# Supplementary material for: YPR2 is a regulator of light modulated carbon and secondary metabolism in Trichoderma reesei
Source: PubMed Central journal article supplement (PMC6417087; doi:10.1186/s12864-019-5574-8), 2019-03-13
Supplement: 12864_2019_5574_MOESM3_ESM.pdf [file 12864_2019_5574_MOESM3_ESM.pdf]

# YPR2 is a light dependent regulator of carbon and secondary metabolism in *Trichoderma reesei*

## SUPPLEMENTARY MATERIAL

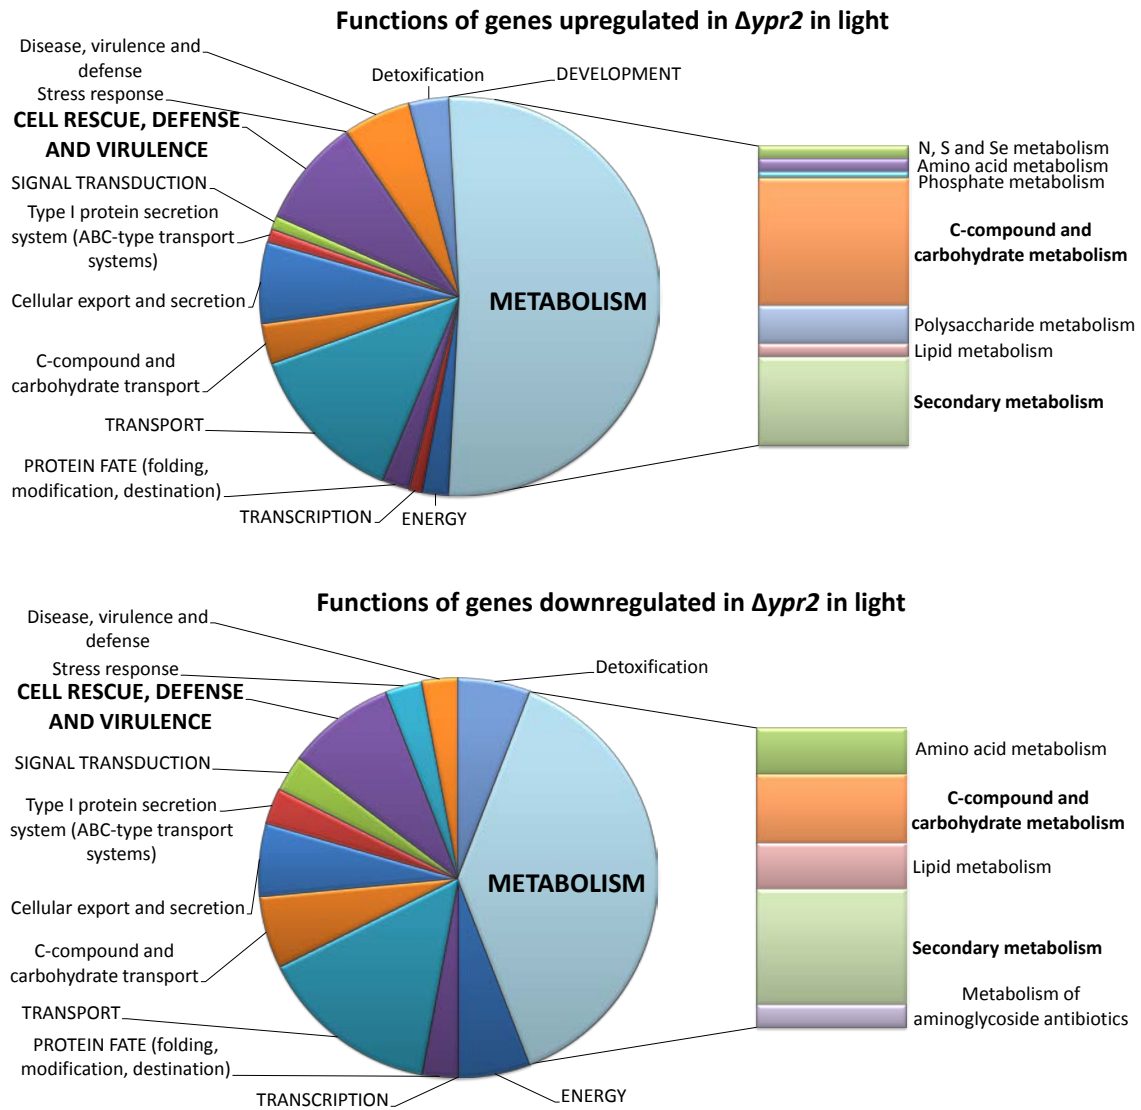

Figure S1. Functions of genes regulated in  $\Delta ypr2$  compared to wildtype upon growth on cellulose in light.
