# Supplementary material for: YPR2 is a regulator of light modulated carbon and secondary metabolism in Trichoderma reesei
Source: BMC Genomics. 2019 Mar 13;20:211. doi: 10.1186/s12864-019-5574-8 (PMC6417087; doi:10.1186/s12864-019-5574-8)
Supplement: Supplementary file 1 — Gene regulation by YPR2. This file contains data on gene regulation by YPR2 in constant light and constant darkness upon growth on cellulose along with clustered regulation and overlapping regulation with induction specific genes as well as by photoreceptors and CRE1. (XLSX 721 kb) [file 12864_2019_5574_MOESM1_ESM.xlsx]

## Sheet: WT_LL vs ypr2_LL
Genes differentially regulated in ∆ypr2 in light upon growth on cellulose																		Schmoll et al., 2016 MMBR annotation Trichoderma									JGI TRE annotation (user curation)			Druzhinina et al., 2016	Annotation Neurospora crassa (BROAD)			Annotation Aspergillus nidulans (Broad)
transcript ID	Protein ID	gene ID	logFC	fold	logCPM	PValue	FDR	regulation in light	regulation in darkness	cluster	TRE number	TRE ID	scaffold JGI	start	end	chromosome (Marie-Nelly et al., 2014)	position in chromosome	TOPIC	gene name	group	subgroup	description	T atro	T virens	N crassa	S cerevisiae	name	defline	description	annotation	LOCUS NCR	SYMBOL	SYNOYM	LOCUS ANID	LENGTH	START	STOP	STRAND	NAME	CHROMOSOME	OPERON	MIPS
jgi|Trire2|59197|e_gw1.6.597.1	59197	e_gw1.6.597.1	1.09272	2.13276	3.68441	6.67434e-15	6.55495e-13	up in ∆ypr2	up in ∆ypr2		59197	TRIRE2_59197	6	704509	704560	1	197	-	-	-	-	-	-	-	-	-	-	-	-	unknown protein, only in Gibberella and Chaetomium	-	-	-	-	-	-	-	-	-	-	-	TRIREDRAFT_59197
jgi|Trire2|121251|estExt_fgenesh5_pg.C_60344	121251	estExt_fgenesh5_pg.C_60344	1.45154	2.735	6.83047	1.03187e-110	3.0158e-107	up in ∆ypr2	-		121251	TRIRE2_121251	6	1203103	1205493	1	306	Effector proteins (competition and defense)	0	Proteins with known effector domains	0	IPR008427 Extracellular membrane protein, CFEM domain	0	212924	NCU10687	0	\N	cell wall protein	Putative cell wall protein. Ser/Thr-rich.	cell wall protein (Metarhizium adhesion Mad1 ?)	NCU10687	0	0	ANID_03141	2825	998113	1000937	-	conserved hypothetical protein	VI	0	TRIREDRAFT_121251
jgi|Trire2|3405|fgenesh1_pm.C_scaffold_6000153	3405	fgenesh1_pm.C_scaffold_6000153	1.45137	2.73467	4.81498	8.49226e-06	0.000189466	up in ∆ypr2	-		3405	TRIRE2_3405	6	1355561	1356002	1	345	Transport	0	Sugar transporter	transporter containing IPR003663 domain	sugar transporter MSF	300941	78848	NCU00809	YDR536W	-	-	-	MSF cellulose response transporter CTR1	NCU00809	0	0	ANID_06831	1814	102046	103859	-	sugar transporter	I	PF07690.9,TIGR00879,PF07690.8,PF00083.17,PF00083.16	TRIREDRAFT_3405
jgi|Trire2|120030|estExt_fgenesh5_pg.C_20094	120030	estExt_fgenesh5_pg.C_20094	1.03655	2.05131	3.50521	8.58076e-15	8.26771e-13	up in ∆ypr2	-		120030	TRIRE2_120030	2	323004	323396	1	434	-	-	-	-	-	-	-	-	-	-	-	-	orphan protein	-	-	-	-	-	-	-	-	-	-	-	TRIREDRAFT_120030
jgi|Trire2|120189|estExt_fgenesh5_pg.C_20401	120189	estExt_fgenesh5_pg.C_20401	1.18078	2.26699	6.7324	1.00231e-66	1.25546e-63	up in ∆ypr2	-		120189	TRIRE2_120189	2	1319789	1320248	1	697	-	-	-	-	-	-	-	-	-	-	-	-	HFBs	-	-	-	-	-	-	-	-	-	-	-	TRIREDRAFT_120189
jgi|Trire2|60518|e_gw1.7.792.1	60518	e_gw1.7.792.1	1.00952	2.01324	1.66971	1.80624e-05	0.000373518	up in ∆ypr2	down in ∆ypr2		60518	TRIRE2_60518	7	1396135	1396902	2	9	-	-	-	-	-	-	-	-	-	-	-	-	short chain dehydrogenase/reductase	NCU02923	0	0	ANID_01300	823	344664	345486	-	conserved hypothetical protein	VIII	PF00106.18	TRIREDRAFT_60518
jgi|Trire2|106686|fgenesh5_pg.C_scaffold_7000487	106686	fgenesh5_pg.C_scaffold_7000487	1.16943	2.24923	0.4951	0.000648967	0.008674	up in ∆ypr2	-		106686	TRIRE2_106686	7	1336359	1336539	2	27	-	-	-	-	-	-	-	-	-	-	-	-	unknown protein	NCU02196	0	0	ANID_06453	1238	226597	227834	+	taurine catabolism dioxygenase TauD	I	PF02668.8,PF02668.9	TRIREDRAFT_106686
jgi|Trire2|60337|e_gw1.7.318.1	60337	e_gw1.7.318.1	2.02189	4.06114	-0.798664	0.000510876	0.00705411	up in ∆ypr2	down in ∆ypr2		60337	TRIRE2_60337	7	1151513	1151620	2	86	-	-	-	-	-	-	-	-	-	-	-	-	unknown protein	-	-	-	-	-	-	-	-	-	-	-	TRIREDRAFT_60337
jgi|Trire2|106606|fgenesh5_pg.C_scaffold_7000407	106606	fgenesh5_pg.C_scaffold_7000407	1.29351	2.45123	2.78908	5.25296e-12	3.65539e-10	up in ∆ypr2	-		106606	TRIRE2_106606	7	1127105	1127417	2	96	-	-	-	-	-	-	-	-	-	-	-	-	unknown protein	-	-	-	-	-	-	-	-	-	-	-	TRIREDRAFT_106606
jgi|Trire2|47424|estExt_Genewise1.C_70669	47424	estExt_Genewise1.C_70669	1.35762	2.56263	2.73031	1.96657e-17	2.49896e-15	up in ∆ypr2	-		47424	TRIRE2_47424	7	1123427	1123811	2	97	-	-	-	-	-	-	-	-	-	-	-	-	unknown protein	NCU05896	0	0	-	-	-	-	-	-	-	-	TRIREDRAFT_47424
jgi|Trire2|46128|estExt_Genewise1.C_40661	46128	estExt_Genewise1.C_40661	1.24338	2.36752	1.43023	1.25487e-06	3.28438e-05	up in ∆ypr2	-		46128	TRIRE2_46128	4	1145422	1145467	2	1171	-	-	-	-	-	-	-	-	-	-	-	-	AAA ATPase	-	-	-	-	-	-	-	-	-	-	-	TRIREDRAFT_46128
jgi|Trire2|57558|e_gw1.4.754.1	57558	e_gw1.4.754.1	1.21211	2.31676	2.67092	1.39403e-13	1.18668e-11	up in ∆ypr2	-		57558	TRIRE2_57558	4	1242265	1242534	2	1198	-	-	-	-	-	-	-	-	-	-	-	-	unknown protein	NCU05694	0	0	ANID_07939	1498	197344	198841	-	conserved hypothetical protein	II	PF09994.2,PF09994.1	TRIREDRAFT_57558
jgi|Trire2|120961|estExt_fgenesh5_pg.C_50250	120961	estExt_fgenesh5_pg.C_50250	6.94304	123.045	-0.801108	3.94926e-06	9.40955e-05	up in ∆ypr2	-		120961	TRIRE2_120961	5	816534	816738	2	1600	CAZymes	cel61b	Glycoside hydrolase	Glycoside hydrolase family61	endo-1,4-glucanase; CEL61B	54785	111696	NCU05969	0	cel61b	Glycoside Hydrolase Family 61	candidate endoglucanase	GH61 polysaccharide monooxygenase CEL61b	-	-	-	-	-	-	-	-	-	-	-	TRIREDRAFT_120961
jgi|Trire2|58602|e_gw1.5.377.1	58602	e_gw1.5.377.1	1.36096	2.56855	3.79858	5.80554e-25	1.27258e-22	up in ∆ypr2	down in ∆ypr2		58602	TRIRE2_58602	5	796536	797120	2	1608	-	-	-	-	-	-	-	-	-	-	-	-	unknown protein	-	-	-	ANID_02117	504	375125	375628	+	conserved hypothetical protein	VII	0	TRIREDRAFT_58602
jgi|Trire2|120926|estExt_fgenesh5_pg.C_50179	120926	estExt_fgenesh5_pg.C_50179	1.53339	2.89466	0.348265	0.000108816	0.0018208	up in ∆ypr2	down in ∆ypr2		120926	TRIRE2_120926	5	556579	556887	2	1666	-	-	-	-	-	-	-	-	-	-	-	-	orphan protein	-	-	-	-	-	-	-	-	-	-	-	TRIREDRAFT_120926
jgi|Trire2|69904|e_gw1.31.42.1	69904	e_gw1.31.42.1	1.40238	2.64337	0.438707	0.000128006	0.00211766	up in ∆ypr2	-		69904	TRIRE2_69904	31	14528	14746	3	66	Heterotrimeric G-protein pathway	0	GPCRs	7-TM receptor	PTH11-like	80140	187849	NCU08718	0	-	-	-	PTH11 GPCR	NCU08718	0	0	-	-	-	-	-	-	-	-	TRIREDRAFT_69904
jgi|Trire2|111237|fgenesh5_pg.C_scaffold_25000079	111237	fgenesh5_pg.C_scaffold_25000079	2.16618	4.48832	-0.905656	0.000507492	0.00702953	up in ∆ypr2	up in ∆ypr2		111237	TRIRE2_111237	25	199951	199974	3	158	-	-	-	-	-	-	-	-	-	-	-	-	orphan protein	-	-	-	-	-	-	-	-	-	-	-	TRIREDRAFT_111237
jgi|Trire2|108010|fgenesh5_pg.C_scaffold_10000400	108010	fgenesh5_pg.C_scaffold_10000400	1.21011	2.31356	1.3553	2.51434e-06	6.263e-05	up in ∆ypr2	down in ∆ypr2		108010	TRIRE2_108010	10	1101250	1102005	3	235	-	-	-	-	-	-	-	-	-	-	-	-	ABC transporter	-	-	-	-	-	-	-	-	-	-	-	TRIREDRAFT_108010
jgi|Trire2|62285|e_gw1.10.412.1	62285	e_gw1.10.412.1	1.04351	2.06123	4.01419	3.85335e-15	4.02217e-13	up in ∆ypr2	up in ∆ypr2		62285	TRIRE2_62285	10	151175	151520	3	528	Sulfur metabolism	0	sulfur assimilation	EC number 2.A.53.1.2	sulfate permease(c-conidial,m-mycelial), related to N. crassa CYS-13 and S. cerevisiae Sul1p/Sul2p	41966	193580	NCU03235	YBR294W	-	-	-	Sulfate permease I (CYS-13)	-	-	-	-	-	-	-	-	-	-	-	TRIREDRAFT_62285
jgi|Trire2|60810|e_gw1.8.811.1	60810	e_gw1.8.811.1	1.1991	2.29596	3.17318	1.32723e-12	1.01193e-10	up in ∆ypr2	up in ∆ypr2		60810	TRIRE2_60810	8	830000	830145	3	816	-	-	-	-	-	-	-	-	-	-	-	-	unknown protein, GPR1/FUN34/yaaH protein, 6TMs	-	-	-	-	-	-	-	-	-	-	-	TRIREDRAFT_60810
jgi|Trire2|121693|estExt_fgenesh5_pg.C_80372	121693	estExt_fgenesh5_pg.C_80372	1.06234	2.08832	3.33683	1.58091e-13	1.33283e-11	up in ∆ypr2	-		121693	TRIRE2_121693	8	1106842	1107075	3	900	-	-	-	-	-	-	-	-	-	-	-	-	Glutathione-dependent formaldehyde-activating, GFA	NCU04342	0	0	-	-	-	-	-	-	-	-	TRIREDRAFT_121693
jgi|Trire2|60758|e_gw1.8.748.1	60758	e_gw1.8.748.1	1.02667	2.03732	1.33861	4.38742e-05	0.000801435	up in ∆ypr2	up in ∆ypr2		60758	TRIRE2_60758	8	1217606	1217780	3	928	-	-	-	-	-	-	-	-	-	-	-	-	SAM-dependent methyltransferase	-	-	-	-	-	-	-	-	-	-	-	TRIREDRAFT_60758
jgi|Trire2|111345|fgenesh5_pg.C_scaffold_26000033	111345	fgenesh5_pg.C_scaffold_26000033	1.11505	2.16602	3.04604	6.01286e-15	5.99099e-13	up in ∆ypr2	down in ∆ypr2		111345	TRIRE2_111345	26	87606	87637	3	1047	-	-	-	-	-	-	-	-	-	-	-	-	unknown protein, Sordariomycetes, 1 TM	NCU02847	0	0	-	-	-	-	-	-	-	-	TRIREDRAFT_111345
jgi|Trire2|71123|e_gw1.54.19.1	71123	e_gw1.54.19.1	1.05054	2.07131	3.16272	3.06606e-11	1.93405e-09	up in ∆ypr2	down in ∆ypr2		71123	TRIRE2_71123	54	4289	4412	3	1501	-	-	-	-	-	-	-	-	-	-	-	-	unknown protein	-	-	-	-	-	-	-	-	-	-	-	TRIREDRAFT_71123
jgi|Trire2|68997|e_gw1.27.30.1	68997	e_gw1.27.30.1	2.85938	7.25702	1.63634	2.28006e-26	7.13984e-24	up in ∆ypr2	down in ∆ypr2		68997	TRIRE2_68997	27	425529	426866	3	1555	-	-	-	-	-	-	-	-	-	-	-	-	unknown TPR domain protein, unknown	-	-	-	-	-	-	-	-	-	-	-	TRIREDRAFT_68997
jgi|Trire2|111584|fgenesh5_pg.C_scaffold_27000155	111584	fgenesh5_pg.C_scaffold_27000155	3.02032	8.11348	-0.547052	1.23803e-06	3.25001e-05	up in ∆ypr2	-		111584	TRIRE2_111584	27	419677	421009	3	1557	-	-	-	-	-	-	-	-	-	-	-	-	unknown protein	-	-	-	-	-	-	-	-	-	-	-	TRIREDRAFT_111584
jgi|Trire2|111494|fgenesh5_pg.C_scaffold_27000065	111494	fgenesh5_pg.C_scaffold_27000065	1.28756	2.44115	1.03652	8.55474e-06	0.000190376	up in ∆ypr2	down in ∆ypr2		111494	TRIRE2_111494	27	159201	160964	3	1635	-	-	-	-	-	-	-	-	-	-	-	-	HET protein	-	-	-	ANID_05504	1851	400723	402573	-	conserved hypothetical protein	V	PF06985.3,PF06985.4	TRIREDRAFT_111494
jgi|Trire2|39426|gw1.27.213.1	39426	gw1.27.213.1	1.96887	3.91461	0.601032	5.64707e-08	1.9885e-06	up in ∆ypr2	down in ∆ypr2		39426	TRIRE2_39426	27	156900	157502	3	1636	-	-	-	-	-	-	-	-	-	-	-	-	unknown protein	-	-	-	-	-	-	-	-	-	-	-	TRIREDRAFT_39426
jgi|Trire2|123818|estExt_fgenesh5_pg.C_270048	123818	estExt_fgenesh5_pg.C_270048	2.2498	4.75616	3.01432	4.52199e-42	3.60443e-39	up in ∆ypr2	-		123818	TRIRE2_123818	27	125545	125816	3	1648	CAZymes	xyn2	Glycoside hydrolase	Glycoside hydrolase family11	xylanase 2 (EC 3.2.1.8)	82355	72838	NCU07225	0	\N	Glycoside Hydrolase Family 11	xylanase 2 (EC 3.2.1.8)	GH11 endo-߀-1,4-xylanase XYN2	NCU07225	gh11-2	0	ANID_09365	712	391384	392095	+	endo-1,4-beta-xylanase B	VIII	PF00457.9,PF00457.10	TRIREDRAFT_123818
jgi|Trire2|112125|fgenesh5_pg.C_scaffold_33000023	112125	fgenesh5_pg.C_scaffold_33000023	1.04651	2.06553	4.79689	1.98396e-16	2.28886e-14	up in ∆ypr2	-		112125	TRIRE2_112125	33	50868	51006	4	19	-	-	-	-	-	-	-	-	-	-	-	-	macrophomate synthase	-	-	-	-	-	-	-	-	-	-	-	TRIREDRAFT_112125
jgi|Trire2|112146|fgenesh5_pg.C_scaffold_33000044	112146	fgenesh5_pg.C_scaffold_33000044	1.1255	2.18177	1.6397	7.50655e-07	2.04402e-05	up in ∆ypr2	up in ∆ypr2		112146	TRIRE2_112146	33	100174	100176	4	36	-	-	-	-	-	-	-	-	-	-	-	-	unknown protein	-	-	-	-	-	-	-	-	-	-	-	TRIREDRAFT_112146
jgi|Trire2|124198|estExt_fgenesh5_pg.C_380025	124198	estExt_fgenesh5_pg.C_380025	3.89936	14.9219	-0.170802	4.83043e-10	2.46297e-08	up in ∆ypr2	up in ∆ypr2		124198	TRIRE2_124198	38	93518	93901	4	82	-	-	-	-	-	-	-	-	-	-	-	-	unknown protein	-	-	-	-	-	-	-	-	-	-	-	TRIREDRAFT_124198
jgi|Trire2|108676|fgenesh5_pg.C_scaffold_13000022	108676	fgenesh5_pg.C_scaffold_13000022	1.45532	2.74218	0.83044	2.90465e-06	7.11396e-05	up in ∆ypr2	up in ∆ypr2		108676	TRIRE2_108676	13	63175	63378	4	130	-	-	-	-	-	-	-	-	-	-	-	-	unknown protein, secreted, only in ascomycota and Acidothermicus cellulolyticus	-	-	-	-	-	-	-	-	-	-	-	TRIREDRAFT_108676
jgi|Trire2|122506|estExt_fgenesh5_pg.C_130033	122506	estExt_fgenesh5_pg.C_130033	1.02162	2.0302	1.28378	5.63776e-05	0.00101295	up in ∆ypr2	-		122506	TRIRE2_122506	13	90455	90515	4	140	Effector proteins (competition and defense)	0	Tandem repeat proteins	0	Tandem repeats	87489	0	0	0	-	-	-	orphan protein	-	-	-	-	-	-	-	-	-	-	-	TRIREDRAFT_122506
jgi|Trire2|105752|fgenesh5_pg.C_scaffold_5000537	105752	fgenesh5_pg.C_scaffold_5000537	2.98479	7.91611	-0.904661	3.03405e-05	0.000582113	up in ∆ypr2	-		105752	TRIRE2_105752	5	1663050	1664192	4	358	-	-	-	-	-	-	-	-	-	-	-	-	C4-dicarboxylate transporter/malic acid transport protein	NCU07517	0	0	ANID_01472	1188	203772	204959	+	conserved hypothetical protein	VII	PF03595.9,PF03595.10,TIGR00816	TRIREDRAFT_105752
jgi|Trire2|46764|estExt_Genewise1.C_50855	46764	estExt_Genewise1.C_50855	1.22716	2.34105	5.67044	2.06694e-13	1.70971e-11	up in ∆ypr2	up in ∆ypr2		46764	TRIRE2_46764	5	1610598	1610681	4	374	-	-	-	-	-	-	-	-	-	-	-	-	unknown protein	-	-	-	-	-	-	-	-	-	-	-	TRIREDRAFT_46764
jgi|Trire2|66888|e_gw1.20.255.1	66888	e_gw1.20.255.1	1.34946	2.54817	0.616152	4.15324e-05	0.000763429	up in ∆ypr2	up in ∆ypr2		66888	TRIRE2_66888	20	353810	355339	4	679	CAZymes	0	Glycosyl transferase	Glycosyl transferase family71	0	291946	231540	0	YIL014W	\N	Glycosyltransferase Family 71	candidate a-glycosyltransferase	GT71 ?-1,3-mannosyltransferase	-	-	-	-	-	-	-	-	-	-	-	TRIREDRAFT_66888
jgi|Trire2|66041|e_gw1.17.138.1	66041	e_gw1.17.138.1	1.17127	2.2521	1.33082	2.74981e-06	6.77256e-05	up in ∆ypr2	-		66041	TRIRE2_66041	17	372708	373110	4	863	CAZymes	chi18-18	Glycoside hydrolase	Glycoside hydrolase family18	chitinase ? Secreted ?	133870	80474	NCU02184	YLR286C	-	-	-	GH18 chitinase CHI18-18	NCU02184	chit-1	0	-	-	-	-	-	-	-	-	TRIREDRAFT_66041
jgi|Trire2|122992|estExt_fgenesh5_pg.C_170057	122992	estExt_fgenesh5_pg.C_170057	1.23303	2.3506	2.34151	1.18721e-09	5.56657e-08	up in ∆ypr2	-		122992	TRIRE2_122992	17	186679	188211	4	915	-	-	-	-	-	-	-	-	-	\N	Glycosyltransferase Family 31	distantly related to b-glycosyltransferases	GT 31 ߀-glycosyltransferase	-	-	-	-	-	-	-	-	-	-	-	TRIREDRAFT_122992
jgi|Trire2|123232|estExt_fgenesh5_pg.C_190084	123232	estExt_fgenesh5_pg.C_190084	6.04372	65.9689	-1.49154	0.000452868	0.00638384	up in ∆ypr2	-		123232	TRIRE2_123232	19	259059	259135	4	1038	CAZymes	egl3/cel12a	Glycoside hydrolase	Glycoside hydrolase family12	endoglucanase	44429	42536	NCU08227	0	cel12A	Glycoside Hydrolase Family 12	\N	GH12 endo-߀-1,4-glucanase	-	-	-	ANID_00452	775	225514	226288	+	xyloglucan-specific endoglucanase	VIII	PF01670.8,PF01670.9	TRIREDRAFT_123232
jgi|Trire2|80639|estExt_GeneWisePlus.C_190288	80639	estExt_GeneWisePlus.C_190288	1.06577	2.09329	5.31162	4.41731e-25	9.93102e-23	up in ∆ypr2	down in ∆ypr2		80639	TRIRE2_80639	19	561024	562127	4	1126	-	-	-	-	-	-	-	-	-	\N	high-affinity iron permease-like protein	Related to yeast FTR1 Iron Permease. Hypothetical iron permease involved in high affinity iron uptake. Transmembrane protein that forms complex with Fet3. Located only 1.5 kb upstream from the tre30893 Fet3 gene model	iron transporter	-	-	-	-	-	-	-	-	-	-	-	TRIREDRAFT_80639
jgi|Trire2|110311|fgenesh5_pg.C_scaffold_19000196	110311	fgenesh5_pg.C_scaffold_19000196	2.6216	6.1543	-1.14663	0.000404897	0.00580088	up in ∆ypr2	-		110311	TRIRE2_110311	19	587584	587764	4	1134	-	-	-	-	-	-	-	-	-	-	-	-	orphan protein	-	-	-	-	-	-	-	-	-	-	-	TRIREDRAFT_110311
jgi|Trire2|123278|estExt_fgenesh5_pg.C_190194	123278	estExt_fgenesh5_pg.C_190194	1.51586	2.85969	1.54712	4.11138e-10	2.14575e-08	up in ∆ypr2	down in ∆ypr2		123278	TRIRE2_123278	19	590133	592075	4	1136	-	-	-	-	-	-	-	-	-	-	-	-	unknown protein	-	-	-	-	-	-	-	-	-	-	-	TRIREDRAFT_123278
jgi|Trire2|80659|estExt_GeneWisePlus.C_190326	80659	estExt_GeneWisePlus.C_190326	2.02686	4.07517	7.93445	2.7849e-76	4.88359e-73	up in ∆ypr2	up in ∆ypr2		80659	TRIRE2_80659	19	609194	609332	4	1141	-	-	-	-	-	-	-	-	-	\N	\N	\N	alcohol oxidase AOX1	NCU01853	0	0	ANID_00567	2416	587672	590087	-	choline dehydrogenase	VIII	PF05199.6,PF05199.5,PF00732.11,PF00732.12	TRIREDRAFT_80659
jgi|Trire2|73643|estExt_GeneWisePlus.C_10274	73643	estExt_GeneWisePlus.C_10274	7.60764	195.042	-0.218703	4.51294e-08	1.61508e-06	up in ∆ypr2	-		73643	TRIRE2_73643	1	524998	525845	5	536	CAZymes	egl4/cel61a	Glycoside hydrolase	Glycoside hydrolase family61	endo-1,4-glucanase; CEL61A (EGL4)	43326	76869	NCU07760	0	cel61A	Glycoside Hydrolase Family 61	endoglucanase (EC 3.2.1.4); C-terminal CBM1 module;identical to CAA71999.1	GH61 polysaccharide monooxygenase CEL61a	NCU07760	gh61-2	0	ANID_10419	996	127031	128026	+	endo-1,4-beta-glucanase	II	PF03443.7,PF03443.6	TRIREDRAFT_73643
jgi|Trire2|73638|estExt_GeneWisePlus.C_10269	73638	estExt_GeneWisePlus.C_10269	4.9963	31.9181	-0.387709	2.11981e-06	5.34094e-05	up in ∆ypr2	-		73638	TRIRE2_73638	1	523161	523836	5	537	CAZymes	0	Carbohydrate binding module	Carbohydrate binding module family1	0	81015	46583	NCU07340	0	cip1	Carbohydrate-Binding Module Family 1	candidate cellulose-binding protein;identical to AAP57751.1	CIP1	-	-	-	-	-	-	-	-	-	-	-	TRIREDRAFT_73638
jgi|Trire2|73631|estExt_GeneWisePlus.C_10262	73631	estExt_GeneWisePlus.C_10262	2.55853	5.89109	1.38244	6.37034e-20	1.01555e-17	up in ∆ypr2	-		73631	TRIRE2_73631	1	506653	506941	5	541	-	-	-	-	-	-	-	-	-	-	-	-	isoamyl alcohol oxidase SOR7	-	-	-	-	-	-	-	-	-	-	-	TRIREDRAFT_73631
jgi|Trire2|43701|estExt_Genewise1.C_10269	43701	estExt_Genewise1.C_10269	4.14729	17.7198	6.40741	0	0	up in ∆ypr2	down in ∆ypr2		43701	TRIRE2_43701	1	501820	502664	5	543	-	-	-	-	-	-	-	-	-	-	-	-	MFS multidrug transporter SOR4	-	-	-	ANID_03270	1724	172382	174105	+	MFS multidrug transporter	VI	PF07690.9,PF07690.8	TRIREDRAFT_43701
jgi|Trire2|109945|fgenesh5_pg.C_scaffold_18000042	109945	fgenesh5_pg.C_scaffold_18000042	1.31665	2.49087	3.27711	1.55857e-16	1.84669e-14	up in ∆ypr2	-		109945	TRIRE2_109945	18	92212	93685	5	932	-	-	-	-	-	-	-	-	-	-	-	-	orphan protein	-	-	-	-	-	-	-	-	-	-	-	TRIREDRAFT_109945
jgi|Trire2|111915|fgenesh5_pg.C_scaffold_30000054	111915	fgenesh5_pg.C_scaffold_30000054	1.09353	2.13395	2.78475	1.21383e-08	4.77259e-07	up in ∆ypr2	down in ∆ypr2		111915	TRIRE2_111915	30	132080	132511	5	1031	-	-	-	-	-	-	-	-	-	-	-	-	SSCRP	NCU09691	0	0	-	-	-	-	-	-	-	-	TRIREDRAFT_111915
jgi|Trire2|5807|fgenesh1_pm.C_scaffold_30000009	5807	fgenesh1_pm.C_scaffold_30000009	1.20627	2.3074	1.38347	1.97689e-06	5.00965e-05	up in ∆ypr2	up in ∆ypr2		5807	TRIRE2_5807	30	83339	83375	5	1049	CAZymes	0	Glycoside hydrolase	Glycoside hydrolase family95	candidate a-glycosidase distantly related to a-1,2-L-fucosidase	50230	67860	0	0	\N	Glycoside Hydrolase Family 95	related to a bacterial a-L-fucosidase	GH95 ?-L-fucosidase	-	-	-	ANID_08149	2701	25713	28413	+	alpha-fucosidase	II	0	TRIREDRAFT_5807
jgi|Trire2|71008|e_gw1.46.25.1	71008	e_gw1.46.25.1	3.66131	12.6522	0.47855	5.87651e-16	6.44066e-14	up in ∆ypr2	down in ∆ypr2	1	71008	TRIRE2_71008	46	44744	44919	5	1083	-	-	-	-	-	-	-	-	-	-	-	-	siderophore transporter	-	-	-	ANID_08365	2008	62799	64806	-	siderophore iron transporter mirB	Unmapped scaffolds	PF07690.9,PF06609.6,PF07690.8	TRIREDRAFT_71008
jgi|Trire2|6085|fgenesh1_pm.C_scaffold_46000008	6085	fgenesh1_pm.C_scaffold_46000008	2.62858	6.18417	1.96557	5.09639e-26	1.44443e-23	up in ∆ypr2	down in ∆ypr2	1	6085	TRIRE2_6085	46	42242	42470	5	1084	-	-	-	-	-	-	-	-	-	-	-	-	Enoyl-CoA hydratase/isomerase, putative	-	-	-	-	-	-	-	-	-	-	-	TRIREDRAFT_6085
jgi|Trire2|82628|estExt_GeneWisePlus.C_460033	82628	estExt_GeneWisePlus.C_460033	2.18988	4.56266	3.4764	7.83779e-35	4.29511e-32	up in ∆ypr2	down in ∆ypr2	1	82628	TRIRE2_82628	46	40455	40826	5	1085	-	-	-	-	-	-	-	-	-	-	-	-	acetyltransferase SidF	-	-	-	ANID_06234	1398	65351	66748	-	siderophore biosynthesis acetylase AceI	I	PF10331.2,PF10331.1	TRIREDRAFT_82628
jgi|Trire2|71010|e_gw1.46.5.1	71010	e_gw1.46.5.1	2.46483	5.52063	1.71332	5.70221e-14	5.20801e-12	up in ∆ypr2	down in ∆ypr2	1	71010	TRIRE2_71010	46	35454	38494	5	1086	Transport	0	ABC transporter	transporter containing IPR003439 domain	Multidrug/pheromone exporter, ABC superfamily	0	51890	NCU08439	YKL209C	-	-	-	MDR-type ABC transporters	-	-	-	ANID_06237	4000	7408	11407	-	ABC multidrug transporter SitT	I	PF00664.15,PF00005.19,PF00664.16,PF00005.20	TRIREDRAFT_71010
jgi|Trire2|112590|fgenesh5_pg.C_scaffold_46000009	112590	fgenesh5_pg.C_scaffold_46000009	1.90506	3.74525	3.33745	3.2019e-17	3.89921e-15	up in ∆ypr2	down in ∆ypr2	1	112590	TRIRE2_112590	46	34241	34300	5	1087	-	-	-	-	-	-	-	-	-	-	-	-	siderophore biosynthesis lipase/esterase	-	-	-	ANID_06239	1092	14226	15317	-	siderophore biosynthesis lipase/esterase	I	PF08538.2,PF08538.3	TRIREDRAFT_112590
jgi|Trire2|71005|e_gw1.46.3.1	71005	e_gw1.46.3.1	2.00883	4.02456	0.828142	3.65331e-09	1.58396e-07	up in ∆ypr2	down in ∆ypr2	1	71005	TRIRE2_71005	46	26764	32532	5	1088	Secondary metabolism	tex20	Nonribosomal peptide synthetase	Siderophore	Nonribosomal peptide synthetase	0	192365	NCU08441	YBR115C	\N	non-ribosomal peptide synthetase	candidate non-ribosomal peptide synthetase (NRPS)	NRPS siderophore synthase	-	-	-	ANID_06236	6367	689	7055	+	nonribosomal peptide synthase SidD	I	PF00550.17,PF00668.13,PF00550.18,PF00501.21,PF00501.20,PF00668.12,TIGR01733	TRIREDRAFT_71005
jgi|Trire2|72567|kg2.C_scaffold_3000002	72567	kg2.C_scaffold_3000002	4.39039	20.972	1.42874	3.75719e-09	1.60698e-07	up in ∆ypr2	-		72567	TRIRE2_72567	3	12573	12664	6	4	CAZymes	cbh2/cel6a	Glycoside hydrolase	Glycoside hydrolase family6	cellobiohydrolase CBH2	44894	78675	NCU09680	0	\N	Glycoside Hydrolase Family 6	cellobiohydrolase II (Cel6A) (EC 3.2.1.91); N-terminal CBM1 module	GH6 Cellobiohydrolase CEL6A/CBH2	NCU09680	gh6-2	0	ANID_01273	1545	259811	261355	-	glycosyl hydrolase family 6 protein	VIII	PF01341.10,PF01341.9	TRIREDRAFT_72567
jgi|Trire2|120312|estExt_fgenesh5_pg.C_30013	120312	estExt_fgenesh5_pg.C_30013	4.15832	17.8558	0.124756	9.50831e-07	2.57311e-05	up in ∆ypr2	-		120312	TRIRE2_120312	3	33880	34208	6	13	CAZymes	egl2/cel5a	Glycoside hydrolase	Glycoside hydrolase family5	endo-1,4-glucanase EGL2	314392	76400	NCU00762	0	cel5A	Glycoside Hydrolase Family 5	endoglucanase Cel5A (EC 3.2.1.4); N-terminal CBM1 module	GH5 endo-?-1,4-glucanase EGL2/CEL5a	NCU00762	gh5-1	0	ANID_01285	1228	292336	293563	-	endo-beta-1,4-glucanase	VIII	PF00150.10,PF00150.11	TRIREDRAFT_120312
jgi|Trire2|104180|fgenesh5_pg.C_scaffold_3000135	104180	fgenesh5_pg.C_scaffold_3000135	6.11321	69.2243	-1.49045	1.86201e-05	0.000383611	up in ∆ypr2	down in ∆ypr2		104180	TRIRE2_104180	3	387432	389206	6	135	-	-	-	-	-	-	-	-	-	-	-	-	Ankyrin	-	-	-	ANID_03513	3771	131598	135368	-	conserved hypothetical protein	II	PF00023.22,PF00023.23	TRIREDRAFT_104180
jgi|Trire2|75247|estExt_GeneWisePlus.C_30301	75247	estExt_GeneWisePlus.C_30301	4.17724	18.0915	1.46916	8.59149e-35	4.43119e-32	up in ∆ypr2	down in ∆ypr2		75247	TRIRE2_75247	3	486980	487987	6	172	-	-	-	-	-	-	-	-	-	-	-	-	AAA+-type ATPase	NCU08641	0	0	ANID_06718	3140	98199	101338	-	AAA family ATPase	I	PF00004.22,PF00004.21	TRIREDRAFT_75247
jgi|Trire2|104293|fgenesh5_pg.C_scaffold_3000248	104293	fgenesh5_pg.C_scaffold_3000248	2.74284	6.69385	-1.06215	0.000152489	0.00245397	up in ∆ypr2	-		104293	TRIRE2_104293	3	778613	778775	6	247	Effector proteins (competition and defense)	0	Hydrophobins	0	Hydrophobins	55116	57903	NCU08192	0	-	-	-	HFB4	NCU08192	0	0	-	-	-	-	-	-	-	-	TRIREDRAFT_104293
jgi|Trire2|123639|estExt_fgenesh5_pg.C_240095	123639	estExt_fgenesh5_pg.C_240095	1.46916	2.7686	0.796684	1.911e-06	4.87082e-05	up in ∆ypr2	up in ∆ypr2		123639	TRIRE2_123639	24	354015	355364	6	866	CAZymes	0	Glycoside hydrolase	Glycoside hydrolase family64	candidate b-glycosidase distantly related to b-1,3-glucanase	41194	50439	NCU06505	0	\N	Glycoside Hydrolase Family 64	candidate b-1,3-glucanase	GH64 endo-1,3-?-glucanase	-	-	-	-	-	-	-	-	-	-	-	TRIREDRAFT_123639
jgi|Trire2|68279|e_gw1.24.264.1	68279	e_gw1.24.264.1	1.38017	2.60299	3.29687	1.41875e-23	2.89294e-21	up in ∆ypr2	-		68279	TRIRE2_68279	24	417081	417620	6	892	-	-	-	-	-	-	-	-	-	-	-	-	Short-chain dehydrogenase/reductase	NCU09735	0	0	ANID_12306	1165	44587	45751	+	short-chain dehydrogenase	VII	PF00106.18	TRIREDRAFT_68279
jgi|Trire2|82026|estExt_GeneWisePlus.C_290148	82026	estExt_GeneWisePlus.C_290148	1.30582	2.47225	6.9804	8.58003e-33	3.95946e-30	up in ∆ypr2	-		82026	TRIRE2_82026	29	265006	265824	6	988	-	-	-	-	-	-	-	-	-	-	-	-	trans-aconitate methyltransferase	-	-	-	ANID_10909	780	57573	58352	+	trans-aconitate 2-methyltransferase	IV	PF05175.7,PF08242.4,PF08241.5,PF08241.4,PF08242.5,PF00891.11	TRIREDRAFT_82026
jgi|Trire2|103189|fgenesh5_pg.C_scaffold_1000822	103189	fgenesh5_pg.C_scaffold_1000822	1.26863	2.40933	0.234266	0.000760516	0.00995254	up in ∆ypr2	-		103189	TRIRE2_103189	1	2971682	2971832	7	266	-	-	-	-	-	-	-	-	-	-	-	-	HET protein	-	-	-	-	-	-	-	-	-	-	-	TRIREDRAFT_103189
jgi|Trire2|74282|estExt_GeneWisePlus.C_11554	74282	estExt_GeneWisePlus.C_11554	1.88171	3.68512	8.48766	7.38826e-26	1.96304e-23	up in ∆ypr2	up in ∆ypr2		74282	TRIRE2_74282	1	2815496	2817706	7	305	Effector proteins (competition and defense)	0	Tandem repeat proteins	0	Tandem repeats: possible associate to cell wall	217708	170508	0	0	-	-	-	QI74 orthologue	-	-	-	-	-	-	-	-	-	-	-	TRIREDRAFT_74282
jgi|Trire2|119864|estExt_fgenesh5_pg.C_10769	119864	estExt_fgenesh5_pg.C_10769	1.94922	3.86165	2.74368	5.56265e-26	1.52417e-23	up in ∆ypr2	-		119864	TRIRE2_119864	1	2808403	2808581	7	307	-	-	-	-	-	-	-	-	-	-	-	-	unknown protein	-	-	-	-	-	-	-	-	-	-	-	TRIREDRAFT_119864
jgi|Trire2|103149|fgenesh5_pg.C_scaffold_1000782	103149	fgenesh5_pg.C_scaffold_1000782	2.00328	4.0091	4.17728	4.77929e-70	6.98414e-67	up in ∆ypr2	-		103149	TRIRE2_103149	1	2804282	2805297	7	308	-	-	-	-	-	-	-	-	-	-	-	-	AAA ATPase	-	-	-	-	-	-	-	-	-	-	-	TRIREDRAFT_103149
jgi|Trire2|54239|e_gw1.1.1456.1	54239	e_gw1.1.1456.1	1.2906	2.44629	0.422546	0.000412925	0.00589662	up in ∆ypr2	up in ∆ypr2		54239	TRIRE2_54239	1	2787639	2788722	7	315	-	-	-	-	-	-	-	-	-	\N	multicopper oxidase	Hypothetical Multicopper Oxidase. Similar to the brown 2 laccase from Aspergillus fumigatus. N-terminal secretion signal predicted by SignalP	Multicopper oxidases	-	-	-	ANID_00901	2078	110269	112346	+	laccase	VIII	PF07732.8,PF07732.7,PF07731.7,PF07731.6,PF00394.15,PF00394.14	TRIREDRAFT_54239
jgi|Trire2|103065|fgenesh5_pg.C_scaffold_1000698	103065	fgenesh5_pg.C_scaffold_1000698	1.51606	2.8601	1.19829	7.31906e-08	2.47774e-06	up in ∆ypr2	down in ∆ypr2		103065	TRIRE2_103065	1	2546736	2548751	7	390	-	-	-	-	-	-	-	-	-	-	-	-	unknown protein	-	-	-	-	-	-	-	-	-	-	-	TRIREDRAFT_103065
jgi|Trire2|110740|fgenesh5_pg.C_scaffold_22000053	110740	fgenesh5_pg.C_scaffold_22000053	1.63759	3.11146	1.32175	6.78345e-10	3.41823e-08	up in ∆ypr2	-		110740	TRIRE2_110740	22	164177	165544	7	896	-	-	-	-	-	-	-	-	-	-	-	-	unknown protein	-	-	-	ANID_02640	1101	11716	12816	+	conserved hypothetical protein	VI	0	TRIREDRAFT_110740
jgi|Trire2|5359|fgenesh1_pm.C_scaffold_22000052	5359	fgenesh1_pm.C_scaffold_22000052	3.64773	12.5336	-1.48981	0.000327825	0.00480664	up in ∆ypr2	up in ∆ypr2		5359	TRIRE2_5359	22	433236	433608	7	973	-	-	-	-	-	-	-	-	-	-	-	-	unknown protein, Duf1348	NCU03152	0	0	ANID_11109	736	15719	16454	+	DUF1348 domain-containing protein	III	PF07080.4,PF07080.3	TRIREDRAFT_5359
jgi|Trire2|110862|fgenesh5_pg.C_scaffold_22000175	110862	fgenesh5_pg.C_scaffold_22000175	1.03837	2.0539	2.2859	1.07099e-08	4.24908e-07	up in ∆ypr2	down in ∆ypr2		110862	TRIRE2_110862	22	537793	539038	7	1002	-	-	-	-	-	-	-	-	-	-	-	-	orphan protein	-	-	-	-	-	-	-	-	-	-	-	TRIREDRAFT_110862
jgi|Trire2|103813|fgenesh5_pg.C_scaffold_2000401	103813	fgenesh5_pg.C_scaffold_2000401	-1.18628	0.439435	1.52101	3.78471e-07	1.10247e-05	down in ∆ypr2	up in ∆ypr2		103813	TRIRE2_103813	2	1311493	1313346	1	694	-	-	-	-	-	-	-	-	-	-	-	-	Serine/threonine protein kinase	-	-	-	-	-	-	-	-	-	-	-	TRIREDRAFT_103813
jgi|Trire2|103907|fgenesh5_pg.C_scaffold_2000495	103907	fgenesh5_pg.C_scaffold_2000495	-1.07992	0.473055	0.766189	0.000292322	0.00437386	down in ∆ypr2	-		103907	TRIRE2_103907	2	1622618	1622839	1	773	-	-	-	-	-	-	-	-	-	-	-	-	unknown protein	-	-	-	-	-	-	-	-	-	-	-	TRIREDRAFT_103907
jgi|Trire2|106537|fgenesh5_pg.C_scaffold_7000338	106537	fgenesh5_pg.C_scaffold_7000338	-1.15092	0.450338	0.426067	0.000707241	0.00935308	down in ∆ypr2	-		106537	TRIRE2_106537	7	946110	946118	2	151	-	-	-	-	-	-	-	-	-	-	-	-	orphan protein	-	-	-	-	-	-	-	-	-	-	-	TRIREDRAFT_106537
jgi|Trire2|57749|e_gw1.4.772.1	57749	e_gw1.4.772.1	-1.01603	0.494475	5.34742	4.4958e-40	3.03224e-37	down in ∆ypr2	up in ∆ypr2		57749	TRIRE2_57749	4	765737	766195	2	1073	-	-	-	-	-	-	-	-	-	-	-	-	MFS permease	-	-	-	ANID_06774	1423	259531	260953	-	conserved hypothetical protein	I	PF07690.9,PF07690.8,PF00083.17	TRIREDRAFT_57749
jgi|Trire2|76065|estExt_GeneWisePlus.C_40750	76065	estExt_GeneWisePlus.C_40750	-1.2791	0.412054	6.52141	2.57995e-40	1.88508e-37	down in ∆ypr2	-		76065	TRIRE2_76065	4	1332061	1332384	2	1225	-	-	-	-	-	-	-	-	-	-	-	-	unknown protein	NCU05404	0	0	ANID_00602	1729	709208	710936	-	endoglucanase	VIII	0	TRIREDRAFT_76065
jgi|Trire2|105445|fgenesh5_pg.C_scaffold_5000230	105445	fgenesh5_pg.C_scaffold_5000230	-1.4802	0.358439	0.593531	6.31926e-06	0.000145809	down in ∆ypr2	-		105445	TRIRE2_105445	5	745058	745109	2	1624	-	-	-	-	-	-	-	-	-	-	-	-	unknown protein, only in Neurospora and A. fumigatus	NCU06412	0	0	-	-	-	-	-	-	-	-	TRIREDRAFT_105445
jgi|Trire2|107972|fgenesh5_pg.C_scaffold_10000362	107972	fgenesh5_pg.C_scaffold_10000362	-1.4203	0.373635	0.00149136	0.000602867	0.00813221	down in ∆ypr2	-		107972	TRIRE2_107972	10	1002901	1002911	3	269	-	-	-	-	-	-	-	-	-	-	-	-	orphan protein	-	-	-	-	-	-	-	-	-	-	-	TRIREDRAFT_107972
jgi|Trire2|60889|e_gw1.8.677.1	60889	e_gw1.8.677.1	-1.36956	0.387009	4.11594	8.34961e-27	2.81575e-24	down in ∆ypr2	-		60889	TRIRE2_60889	8	314239	314622	3	673	-	-	-	-	-	-	-	-	-	-	-	-	MFS permease	-	-	-	-	-	-	-	-	-	-	-	TRIREDRAFT_60889
jgi|Trire2|111514|fgenesh5_pg.C_scaffold_27000085	111514	fgenesh5_pg.C_scaffold_27000085	-1.16951	0.444571	2.13997	4.72057e-09	1.97095e-07	down in ∆ypr2	up in ∆ypr2		111514	TRIRE2_111514	27	205802	205885	3	1616	-	-	-	-	-	-	-	-	-	-	-	-	unknown protein, 1TM	NCU05647	0	0	ANID_03295	948	63160	64107	+	conserved hypothetical protein	VI	0	TRIREDRAFT_111514
jgi|Trire2|112115|fgenesh5_pg.C_scaffold_33000013	112115	fgenesh5_pg.C_scaffold_33000013	-1.36041	0.389471	1.30533	7.03915e-08	2.40153e-06	down in ∆ypr2	-		112115	TRIRE2_112115	33	28755	28830	4	10	-	-	-	-	-	-	-	-	-	-	-	-	unknown protein	-	-	-	-	-	-	-	-	-	-	-	TRIREDRAFT_112115
jgi|Trire2|43101|gw1.38.71.1	43101	gw1.38.71.1	-1.28237	0.411118	1.44913	1.20231e-07	3.9044e-06	down in ∆ypr2	down in ∆ypr2		43101	TRIRE2_43101	38	121104	121490	4	91	-	-	-	-	-	-	-	-	-	-	-	-	unknown protein	-	-	-	-	-	-	-	-	-	-	-	TRIREDRAFT_43101
jgi|Trire2|122614|estExt_fgenesh5_pg.C_130245	122614	estExt_fgenesh5_pg.C_130245	-1.05829	0.480201	7.18848	4.67439e-19	6.94662e-17	down in ∆ypr2	up in ∆ypr2		122614	TRIRE2_122614	13	807321	807553	4	314	-	-	-	-	-	-	-	-	-	-	-	-	orphan protein	-	-	-	-	-	-	-	-	-	-	-	TRIREDRAFT_122614
jgi|Trire2|124318|RAM_jgi|trire1|32977|fgenesh1_pg.C_scaffold_1000574	124318	RAM_jgi	-6.13634	0.014216	2.67943	2.60902e-16	2.97089e-14	down in ∆ypr2	down in ∆ypr2		124318	TRIRE2_124318	1	23637	23654	5	664	-	-	-	-	-	-	-	-	-	\N	Hypothetical protein	shares amino acid sequence identity with ATP-dependent RNA helicase.	ATP-dependent RNA helicase.	-	-	-	-	-	-	-	-	-	-	-	TRIREDRAFT_124318
jgi|Trire2|50616|estExt_Genewise1.C_180149	50616	estExt_Genewise1.C_180149	-1.19372	0.437174	8.62547	6.69897e-21	1.12955e-18	down in ∆ypr2	up in ∆ypr2		50616	TRIRE2_50616	18	274963	275260	5	880	-	-	-	-	-	-	-	-	-	-	-	-	Coenzyme A transferase	NCU08145	0	0	ANID_09394	1955	480092	482046	-	succinyl-CoA:3-ketoacid-coenzyme A transferase subunit A	VIII	TIGR02428,TIGR02429,PF01144.15,PF01144.16	TRIREDRAFT_50616
jgi|Trire2|69811|e_gw1.30.32.1	69811	e_gw1.30.32.1	-1.08504	0.47138	4.563	6.53431e-27	2.3872e-24	down in ∆ypr2	up in ∆ypr2		69811	TRIRE2_69811	30	91417	91963	5	1046	-	-	-	-	-	-	-	-	-	\N	Gamma-glutamyltranspeptidase-like protein	pfam01019, G_glu_transpept, Gamma-glutamyltranspeptidase	?-glutamyltransferase	-	-	-	ANID_10444	2308	703242	705549	-	gamma-glutamyltranspeptidase	II	PF01019.13,PF01019.14,TIGR00066	TRIREDRAFT_69811
jgi|Trire2|57034|e_gw1.3.161.1	57034	e_gw1.3.161.1	-1.14447	0.452357	1.49193	1.31154e-06	3.40224e-05	down in ∆ypr2	-		57034	TRIRE2_57034	3	1398413	1400233	6	423	-	-	-	-	-	-	-	-	-	-	-	-	unknown protein	NCU02625	0	0	-	-	-	-	-	-	-	-	TRIREDRAFT_57034
jgi|Trire2|71823|kg2.C_scaffold_15000010	71823	kg2.C_scaffold_15000010	-2.76073	0.147549	1.61199	1.84458e-25	4.49259e-23	down in ∆ypr2	up in ∆ypr2		71823	TRIRE2_71823	15	52993	53044	7	33	Transcription factors	0	Zn2Cys6	0	conserved hypothetical protein	316880	204757	NCU08136	YIL130W	\N	fungal specific transcription factor domain-containing protein	This domain is found in a number of fungal transcription factors including transcriptional activator xlnR, yeast regulatory protein GAL4, and other transcription proteins regulating a variety of cellular and metabolic processes.	Zn2Cys6 transcriptional regulator	-	-	-	-	-	-	-	-	-	-	-	TRIREDRAFT_71823
jgi|Trire2|65067|e_gw1.15.119.1	65067	e_gw1.15.119.1	-3.36267	0.0972154	0.974934	6.08934e-23	1.16068e-20	down in ∆ypr2	-		65067	TRIRE2_65067	15	56788	56913	7	34	-	-	-	-	-	-	-	-	-	-	-	-	short chain dehydrogenase/reductase	-	-	-	ANID_08658	1725	237542	239266	+	conserved hypothetical protein	III	PF00248.14	TRIREDRAFT_65067
jgi|Trire2|109338|fgenesh5_pg.C_scaffold_15000140	109338	fgenesh5_pg.C_scaffold_15000140	-1.0685	0.476815	1.8304	4.74098e-07	1.35404e-05	down in ∆ypr2	down in ∆ypr2		109338	TRIRE2_109338	15	510647	510843	7	157	-	-	-	-	-	-	-	-	-	-	-	-	unknown protein, in A. oryzae and G. zeae	-	-	-	-	-	-	-	-	-	-	-	TRIREDRAFT_109338
jgi|Trire2|103136|fgenesh5_pg.C_scaffold_1000769	103136	fgenesh5_pg.C_scaffold_1000769	-1.54759	0.342081	4.95416	6.74943e-46	6.57545e-43	down in ∆ypr2	-		103136	TRIRE2_103136	1	2770530	2770562	7	320	-	-	-	-	-	-	-	-	-	-	-	-	Glycolate oxidase	-	-	-	ANID_07055	1314	262884	264197	+	cytochrome b2	IV	PF01070.10,PF01070.11	TRIREDRAFT_103136

## Sheet: WT_DD vs ypr2_DD
Genes differentially regulated in ∆ypr2 in darkness upon growth on cellulose																	Schmoll et al., 2016 MMBR annotation Trichoderma								JGI TRE annotation (user curation)			Druzhinina et al., 2016	Annotation Neurospora crassa (BROAD)			Annotation Aspergillus nidulans (Broad)
transcript ID	Protein ID	gene ID	logFC	fold	logCPM	PValue	FDR	regulation	cluster	TRE number	TRE ID	scaffold JGI	start	end	chromosome (Marie-Nelly et al., 2014)	position in chromosome	TOPIC	gene name	group	subgroup	description	T atro	T virens	S cerevisiae	name	defline	description	annotation	LOCUS NCR	SYMBOL	SYNOYM	LOCUS ANID	LENGTH	START	STOP	STRAND	NAME	CHROMOSOME	OPERON	MIPS
jgi|Trire2|105775|fgenesh5_pg.C_scaffold_6000001	105775	fgenesh5_pg.C_scaffold_6000001	1.91012	3.75842	3.46834	3.7529e-27	6.25179e-26	up in ∆ypr2		105775	TRIRE2_105775	6	2303	2465	1	1	-	-	-	-	-	-	-	-	-	-	-	unknown protein	-	-	-	-	-	-	-	-	-	-	-	TRIREDRAFT_105775
jgi|Trire2|59771|e_gw1.6.253.1	59771	e_gw1.6.253.1	1.80129	3.48532	-0.0160516	4.88741e-05	0.000158172	up in ∆ypr2		59771	TRIRE2_59771	6	28628	29590	1	10	-	-	-	-	-	-	-	-	-	-	-	UbiA prenyltransferase, putative	-	-	-	ANID_09259	1125	61997	63121	+	conserved hypothetical protein	VIII	PF01040.11,PF01040.10	TRIREDRAFT_59771
jgi|Trire2|105787|fgenesh5_pg.C_scaffold_6000013	105787	fgenesh5_pg.C_scaffold_6000013	1.11181	2.16117	0.713671	0.00106095	0.00270817	up in ∆ypr2		105787	TRIRE2_105787	6	29923	29932	1	11	-	-	-	-	-	-	-	-	-	-	-	unknown protein	-	-	-	-	-	-	-	-	-	-	-	TRIREDRAFT_105787
jgi|Trire2|59377|e_gw1.6.515.1	59377	e_gw1.6.515.1	1.57342	2.97609	0.672649	5.1277e-05	0.000165589	up in ∆ypr2		59377	TRIRE2_59377	6	56985	57088	1	18	Secondary metabolism	0	Cytochrome P450	p450 superfamily (cI12078)	0	0	0	0	\N	\N	P450, possibly part of secondary metabolite cluster that contains PKS (tre33804) and PKS-NRPS hybrid (tre14836) genes	Cytochrome P450 CYP2 subfamily	-	-	-	-	-	-	-	-	-	-	-	TRIREDRAFT_59377
jgi|Trire2|105808|fgenesh5_pg.C_scaffold_6000034	105808	fgenesh5_pg.C_scaffold_6000034	5.71903	52.6742	1.36154	5.42114e-35	1.30473e-33	up in ∆ypr2		105808	TRIRE2_105808	6	82826	83770	1	24	Asexual development	con-13	Orthologues of Neurospora crassa con genes involved in asexual reproduction	0	N.crassa CON-13 - conidiation-specific protein CON-13	168477	216126	0	-	-	-	CON-13	NCU07324	con-13	0	ANID_03403	933	445229	446161	-	conserved hypothetical protein	VI	0	TRIREDRAFT_105808
jgi|Trire2|105810|fgenesh5_pg.C_scaffold_6000036	105810	fgenesh5_pg.C_scaffold_6000036	1.51071	2.8495	4.29237	1.4597e-27	2.4685e-26	up in ∆ypr2		105810	TRIRE2_105810	6	89506	89817	1	26	-	-	-	-	-	-	-	-	-	-	-	Peptidase M4, thermolysin, putative	-	-	-	-	-	-	-	-	-	-	-	TRIREDRAFT_105810
jgi|Trire2|121126|estExt_fgenesh5_pg.C_60037	121126	estExt_fgenesh5_pg.C_60037	1.03944	2.05543	7.67168	6.38253e-10	3.83768e-09	up in ∆ypr2		121126	TRIRE2_121126	6	91636	91785	1	27	-	-	-	-	-	-	-	-	-	-	-	unknown protein	NCU06120	0	0	-	-	-	-	-	-	-	-	TRIREDRAFT_121126
jgi|Trire2|59402|e_gw1.6.346.1	59402	e_gw1.6.346.1	1.18302	2.27052	0.996901	0.000525209	0.00141894	up in ∆ypr2		59402	TRIRE2_59402	6	108309	108476	1	30	-	-	-	-	-	-	-	-	-	-	-	arsenate reductase Arc2	NCU07197	0	0	ANID_06362	627	392344	392970	+	arsenate reductase	I	PF00581.12,PF00581.13	TRIREDRAFT_59402
jgi|Trire2|105816|fgenesh5_pg.C_scaffold_6000042	105816	fgenesh5_pg.C_scaffold_6000042	1.38347	2.60895	3.26974	1.8744e-12	1.42197e-11	up in ∆ypr2		105816	TRIRE2_105816	6	109088	110590	1	31	-	-	-	-	-	-	-	-	-	-	-	unknown protein	-	-	-	ANID_11121	3057	110232	113288	+	conserved hypothetical protein	III	PF08386.2,PF08386.3,PF00561.13,PF00561.12	TRIREDRAFT_105816
jgi|Trire2|105823|fgenesh5_pg.C_scaffold_6000049	105823	fgenesh5_pg.C_scaffold_6000049	3.23267	9.40003	1.97709	1.11833e-28	2.01729e-27	up in ∆ypr2		105823	TRIRE2_105823	6	130041	130525	1	37	-	-	-	-	-	-	-	-	-	-	-	FAD binding domain protein	-	-	-	-	-	-	-	-	-	-	-	TRIREDRAFT_105823
jgi|Trire2|59351|e_gw1.6.557.1	59351	e_gw1.6.557.1	1.39109	2.62276	1.11737	4.5469e-06	1.72689e-05	up in ∆ypr2		59351	TRIRE2_59351	6	161087	161351	1	48	-	-	-	-	-	-	-	-	\N	1-aminocyclopropane-1-carboxylate synthase	\N	1-aminocyclopropane-1-carboxylate synthase	-	-	-	-	-	-	-	-	-	-	-	TRIREDRAFT_59351
jgi|Trire2|105844|fgenesh5_pg.C_scaffold_6000070	105844	fgenesh5_pg.C_scaffold_6000070	3.56001	11.7942	4.88795	5.86445e-144	1.74546e-141	up in ∆ypr2		105844	TRIRE2_105844	6	184816	185150	1	55	-	-	-	-	-	-	-	-	-	-	-	SSCRP	-	-	-	-	-	-	-	-	-	-	-	TRIREDRAFT_105844
jgi|Trire2|59491|e_gw1.6.305.1	59491	e_gw1.6.305.1	2.23143	4.696	1.53601	1.22508e-14	1.08843e-13	up in ∆ypr2		59491	TRIRE2_59491	6	186938	187448	1	56	-	-	-	-	-	-	-	-	-	-	-	unknown protein	-	-	-	-	-	-	-	-	-	-	-	TRIREDRAFT_59491
jgi|Trire2|105851|fgenesh5_pg.C_scaffold_6000077	105851	fgenesh5_pg.C_scaffold_6000077	2.63653	6.21833	2.98955	9.31727e-28	1.60089e-26	up in ∆ypr2		105851	TRIRE2_105851	6	205993	206985	1	62	-	-	-	-	-	-	-	-	\N	GMC oxidoreductase	Glucose/Methanol/Choline Oxidoreductase family member; no significantly better alignments with verified examples of these three classes or aryl alcohol oxidase	GMC oxidoreductase family protein	NCU07113	0	0	-	-	-	-	-	-	-	-	TRIREDRAFT_105851
jgi|Trire2|59338|e_gw1.6.603.1	59338	e_gw1.6.603.1	1.33927	2.53024	2.76901	5.21261e-12	3.82444e-11	up in ∆ypr2		59338	TRIRE2_59338	6	209272	210237	1	63	-	-	-	-	-	-	-	-	\N	D-Alanine aminotransferase	cd01558, D-AAT_like, D-Alanine aminotransferase	D-Alanine aminotransferase	-	-	-	-	-	-	-	-	-	-	-	TRIREDRAFT_59338
jgi|Trire2|121138|estExt_fgenesh5_pg.C_60084	121138	estExt_fgenesh5_pg.C_60084	1.15962	2.23398	0.887931	0.000225373	0.000649775	up in ∆ypr2		121138	TRIRE2_121138	6	226058	226186	1	68	Transcription factors	0	Zn2Cys6	0	hypothetical protein	258080	9695	YOR380W	\N	N-terminal fungal transcription regulatory domain-containing protein	The N-terminal region of a number of fungal transcriptional regulatory proteins contains a Cys-rich motif that is involved in zinc-dependent binding of DNA. The region forms a binuclear Zn cluster, in which two Zn atoms are bound by six Cys residues	Zn2Cys6 transcriptional regulator	-	-	-	-	-	-	-	-	-	-	-	TRIREDRAFT_121138
jgi|Trire2|105870|fgenesh5_pg.C_scaffold_6000096	105870	fgenesh5_pg.C_scaffold_6000096	2.41409	5.32982	3.71731	1.85615e-38	5.03754e-37	up in ∆ypr2		105870	TRIRE2_105870	6	262007	262164	1	79	-	-	-	-	-	-	-	-	-	-	-	Aquaporin (major intrinsic protein family)	-	-	-	-	-	-	-	-	-	-	-	TRIREDRAFT_105870
jgi|Trire2|105880|fgenesh5_pg.C_scaffold_6000106	105880	fgenesh5_pg.C_scaffold_6000106	1.46157	2.75408	0.391822	0.000126975	0.000383661	up in ∆ypr2		105880	TRIRE2_105880	6	304997	306313	1	88	Transcription factors	0	Zn2Cys6	0	hypothetical protein	320014	29063	YCR106W	-	-	-	Zn2Cys6 transcriptional regulator	-	-	-	-	-	-	-	-	-	-	-	TRIREDRAFT_105880
jgi|Trire2|3292|fgenesh1_pm.C_scaffold_6000040	3292	fgenesh1_pm.C_scaffold_6000040	1.91713	3.77672	-0.0309246	2.91447e-05	9.71017e-05	up in ∆ypr2	1	3292	TRIRE2_3292	6	348843	348891	1	103	-	-	-	-	-	-	-	-	-	-	-	short chain dehydrogenase/reductase	-	-	-	ANID_02177	1254	135714	136967	+	short chain dehydrogenase/oxidoreductase	VII	PF00106.17,PF00106.18,PF08659.3	TRIREDRAFT_3292
jgi|Trire2|73134|kg2.C_scaffold_6000026	73134	kg2.C_scaffold_6000026	2.64204	6.24214	-0.922719	0.000157881	0.000469281	up in ∆ypr2	1	73134	TRIRE2_73134	6	352450	352821	1	104	CAZymes	0	Glycosyl transferase	Glycosyl transferase family20	0	33098	-	YDR074W	\N	Glycosyltransferase Family 20	candidate trehalose-6-phosphate synthase	GT20 trehalose-6-phosphate synthase/trehalose phosphatase	-	-	-	-	-	-	-	-	-	-	-	TRIREDRAFT_73134
jgi|Trire2|59372|e_gw1.6.638.1	59372	e_gw1.6.638.1	6.07612	67.4676	0.354031	2.29782e-15	2.13056e-14	up in ∆ypr2	1	59372	TRIRE2_59372	6	354842	355192	1	105	-	-	-	-	-	-	-	-	-	-	-	unknown protein	-	-	-	-	-	-	-	-	-	-	-	TRIREDRAFT_59372
jgi|Trire2|105904|fgenesh5_pg.C_scaffold_6000130	105904	fgenesh5_pg.C_scaffold_6000130	1.34153	2.53419	2.4625	5.48783e-09	2.99699e-08	up in ∆ypr2		105904	TRIRE2_105904	6	385061	386041	1	112	-	-	-	-	-	-	-	-	-	-	-	unknown protein	-	-	-	-	-	-	-	-	-	-	-	TRIREDRAFT_105904
jgi|Trire2|59151|e_gw1.6.350.1	59151	e_gw1.6.350.1	2.20459	4.60943	6.15552	2.15523e-46	7.34506e-45	up in ∆ypr2	2	59151	TRIRE2_59151	6	502741	503205	1	135	Asexual development	ccg-13	Orthologues of Neurospora crassa ccg genes involved in asexual reproduction	0	BYS1 domain-containing protein	300786	216106	0	-	-	-	BYS1 domain-containing protein	NCU08907	ccg-13	ncw-7	ANID_08043	480	90538	91017	+	BYS1 domain-containing protein	II	PF04681.5	TRIREDRAFT_59151
jgi|Trire2|105931|fgenesh5_pg.C_scaffold_6000157	105931	fgenesh5_pg.C_scaffold_6000157	1.69728	3.24289	-0.104003	0.0007496	0.00196496	up in ∆ypr2	2	105931	TRIRE2_105931	6	509949	509988	1	137	CAZymes	0	Glycoside hydrolase	Glycoside hydrolase family20	candidate b-glycosidase distantly related to N-acetyl-b-D-glucosaminidase	33962	180069	0	\N	Glycoside Hydrolase Family 20	related to b-N-acetylhexosaminidases	GH20 N-acetyl-?-hexosaminidase	-	-	-	ANID_02424	3102	4432	7533	+	beta-N-acetylhexosaminidase	VII	PF00728.15,PF00728.14	TRIREDRAFT_105931
jgi|Trire2|121163|estExt_fgenesh5_pg.C_60157	121163	estExt_fgenesh5_pg.C_60157	3.4387	10.8431	5.37491	3.29388e-148	1.0893e-145	up in ∆ypr2	2	121163	TRIRE2_121163	6	512920	512997	1	138	-	-	-	-	-	-	-	-	-	-	-	unknown protein	NCU07345	0	0	ANID_00635	639	29094	29732	+	conserved hypothetical protein	VIII	0	TRIREDRAFT_121163
jgi|Trire2|59152|e_gw1.6.342.1	59152	e_gw1.6.342.1	1.0633	2.08971	1.92981	5.37011e-06	2.01724e-05	up in ∆ypr2		59152	TRIRE2_59152	6	541000	541150	1	150	-	-	-	-	-	-	-	-	-	-	-	unknown protein	NCU01855	0	0	-	-	-	-	-	-	-	-	TRIREDRAFT_59152
jgi|Trire2|59382|e_gw1.6.10.1	59382	e_gw1.6.10.1	1.05298	2.07481	4.17031	1.43758e-09	8.32434e-09	up in ∆ypr2		59382	TRIRE2_59382	6	556640	557069	1	154	-	-	-	-	-	-	-	-	-	-	-	unknown protein	NCU01193	0	0	-	-	-	-	-	-	-	-	TRIREDRAFT_59382
jgi|Trire2|59322|e_gw1.6.256.1	59322	e_gw1.6.256.1	5.19832	36.7155	3.73797	3.14668e-89	3.34485e-87	up in ∆ypr2		59322	TRIRE2_59322	6	561647	562160	1	155	-	-	-	-	-	-	-	-	-	-	-	Zinc-binding oxidoreductase	-	-	-	ANID_11094	1280	215788	217067	+	zinc-binding oxidoreductase ToxD	III	PF00107.18,PF00107.19,PF08240.5,PF08240.4	TRIREDRAFT_59322
jgi|Trire2|76758|estExt_GeneWisePlus.C_60277	76758	estExt_GeneWisePlus.C_60277	1.17006	2.25021	1.9851	3.45682e-07	1.52349e-06	up in ∆ypr2		76758	TRIRE2_76758	6	596683	597077	1	164	Transport	0	Sugar transporter	transporter containing IPR003663 domain	0	0	28190	YGR289C	\N	maltose permease	\N	maltose permease	-	-	-	ANID_03515	1593	140734	142326	-	MFS maltose permease	II	PF07690.9,TIGR00879,PF07690.8,PF00083.17,PF00083.16	TRIREDRAFT_76758
jgi|Trire2|121178|estExt_fgenesh5_pg.C_60189	121178	estExt_fgenesh5_pg.C_60189	1.10815	2.15568	6.7467	8.33511e-12	6.0068e-11	up in ∆ypr2		121178	TRIRE2_121178	6	605173	606276	1	167	-	-	-	-	-	-	-	-	-	-	-	unknown protein	-	-	-	-	-	-	-	-	-	-	-	TRIREDRAFT_121178
jgi|Trire2|59267|e_gw1.6.108.1	59267	e_gw1.6.108.1	2.81679	7.04591	0.787011	9.27513e-12	6.65737e-11	up in ∆ypr2	3	59267	TRIRE2_59267	6	656174	657973	1	183	-	-	-	-	-	-	-	-	\N	Pyruvate decarboxylase	COG3961, Pyruvate decarboxylase and related thiamine pyrophosphate-requiring enzymes	pyruvate decarboxylase	-	-	-	ANID_08396	1933	51414	53346	+	pyruvate decarboxylase	Unmapped scaffolds	PF00205.14,PF02775.14,PF00205.15,PF02776.10,PF02775.13,PF02776.11	TRIREDRAFT_59267
jgi|Trire2|105983|fgenesh5_pg.C_scaffold_6000209	105983	fgenesh5_pg.C_scaffold_6000209	5.38745	41.8585	-2.06808	0.00254822	0.00602411	up in ∆ypr2	3	105983	TRIRE2_105983	6	659009	659266	1	184	-	-	-	-	-	-	-	-	-	-	-	unknown protein	-	-	-	-	-	-	-	-	-	-	-	TRIREDRAFT_105983
jgi|Trire2|105984|fgenesh5_pg.C_scaffold_6000210	105984	fgenesh5_pg.C_scaffold_6000210	1.23857	2.35964	3.08877	3.08019e-12	2.2843e-11	up in ∆ypr2	3	105984	TRIRE2_105984	6	660250	661062	1	185	-	-	-	-	-	-	-	-	-	-	-	SSCRP	-	-	-	-	-	-	-	-	-	-	-	TRIREDRAFT_105984
jgi|Trire2|22000|estExt_fgenesh1_pm.C_60083	22000	estExt_fgenesh1_pm.C_60083	1.13572	2.19728	5.61635	5.91903e-07	2.52513e-06	up in ∆ypr2		22000	TRIRE2_22000	6	681181	681327	1	193	-	-	-	-	-	-	-	-	-	-	-	unknown protein	NCU01891	0	0	ANID_10588	798	81136	81933	-	conserved hypothetical protein	III	0	TRIREDRAFT_22000
jgi|Trire2|121187|estExt_fgenesh5_pg.C_60218	121187	estExt_fgenesh5_pg.C_60218	1.79287	3.46503	5.23712	2.65385e-56	1.20286e-54	up in ∆ypr2		121187	TRIRE2_121187	6	688488	688797	1	194	-	-	-	-	-	-	-	-	-	-	-	unknown protein	NCU01893	0	0	-	-	-	-	-	-	-	-	TRIREDRAFT_121187
jgi|Trire2|59197|e_gw1.6.597.1	59197	e_gw1.6.597.1	1.25174	2.38128	3.30821	4.66059e-12	3.44205e-11	up in ∆ypr2		59197	TRIRE2_59197	6	704509	704560	1	197	-	-	-	-	-	-	-	-	-	-	-	unknown protein, only in Gibberella and Chaetomium	-	-	-	-	-	-	-	-	-	-	-	TRIREDRAFT_59197
jgi|Trire2|76784|estExt_GeneWisePlus.C_60334	76784	estExt_GeneWisePlus.C_60334	1.34649	2.54292	6.55556	6.82717e-40	1.97281e-38	up in ∆ypr2		76784	TRIRE2_76784	6	712418	712474	1	201	-	-	-	-	-	-	-	-	-	-	-	sorbitol dehydrogenase	NCU07022	0	0	ANID_00774	1265	148454	149718	-	zinc-dependent alcohol dehydrogenase	VIII	PF00107.18,PF00107.19,PF08240.5,PF08240.4	TRIREDRAFT_76784
jgi|Trire2|106029|fgenesh5_pg.C_scaffold_6000255	106029	fgenesh5_pg.C_scaffold_6000255	1.22621	2.33952	3.87344	2.32397e-15	2.15256e-14	up in ∆ypr2		106029	TRIRE2_106029	6	800268	801178	1	223	-	-	-	-	-	-	-	-	-	-	-	MFS permease	NCU06167	0	0	ANID_04481	1708	35464	37171	-	MFS monocarboxylate transporter	III	PF07690.9,PF07690.8,PF00083.17	TRIREDRAFT_106029
jgi|Trire2|106035|fgenesh5_pg.C_scaffold_6000261	106035	fgenesh5_pg.C_scaffold_6000261	1.16324	2.2396	3.40284	2.27971e-12	1.71487e-11	up in ∆ypr2		106035	TRIRE2_106035	6	824928	826043	1	228	-	-	-	-	-	-	-	-	-	-	-	unknown protein	-	-	-	-	-	-	-	-	-	-	-	TRIREDRAFT_106035
jgi|Trire2|106043|fgenesh5_pg.C_scaffold_6000269	106043	fgenesh5_pg.C_scaffold_6000269	1.29479	2.45342	1.26432	7.82205e-06	2.86477e-05	up in ∆ypr2		106043	TRIRE2_106043	6	866745	867080	1	236	-	-	-	-	-	-	-	-	-	-	-	unknown protein, GFA-domain	-	-	-	-	-	-	-	-	-	-	-	TRIREDRAFT_106043
jgi|Trire2|59381|e_gw1.6.265.1	59381	e_gw1.6.265.1	1.69876	3.24622	2.87364	1.82643e-16	1.79014e-15	up in ∆ypr2		59381	TRIRE2_59381	6	927919	928023	1	250	-	-	-	-	-	-	-	-	-	-	-	SAM-dependent methyltransferases	-	-	-	-	-	-	-	-	-	-	-	TRIREDRAFT_59381
jgi|Trire2|121230|estExt_fgenesh5_pg.C_60300	121230	estExt_fgenesh5_pg.C_60300	1.26193	2.39817	7.20695	1.51925e-07	7.00328e-07	up in ∆ypr2		121230	TRIRE2_121230	6	982863	984359	1	265	-	-	-	-	-	-	-	-	\N	squalene monooxygenase-like protein	\N	orphan protein	NCU08280	0	0	ANID_11008	1509	42688	44196	-	squalene epoxidase	IV	PF08491.2,PF08491.3,PF01266.17,PF01494.12	TRIREDRAFT_121230
jgi|Trire2|106129|fgenesh5_pg.C_scaffold_6000355	106129	fgenesh5_pg.C_scaffold_6000355	1.44344	2.71968	3.73078	3.03401e-20	3.64121e-19	up in ∆ypr2		106129	TRIRE2_106129	6	1233955	1234129	1	311	-	-	-	-	-	-	-	-	-	-	-	unknown protein, only present in ascomycota	NCU07287	0	0	-	-	-	-	-	-	-	-	TRIREDRAFT_106129
jgi|Trire2|106181|fgenesh5_pg.C_scaffold_6000407	106181	fgenesh5_pg.C_scaffold_6000407	2.88418	7.38285	2.53878	3.43201e-11	2.34275e-10	up in ∆ypr2		106181	TRIRE2_106181	6	1414344	1414456	1	360	-	-	-	-	-	-	-	-	-	-	-	orphan protein	-	-	-	-	-	-	-	-	-	-	-	TRIREDRAFT_106181
jgi|Trire2|21412|estExt_fgenesh1_pm.C_20005	21412	estExt_fgenesh1_pm.C_20005	1.22083	2.33081	8.98425	2.46246e-17	2.54483e-16	up in ∆ypr2		21412	TRIRE2_21412	2	44212	44859	1	379	-	-	-	-	-	-	-	-	-	-	-	unknown protein	-	-	-	-	-	-	-	-	-	-	-	TRIREDRAFT_21412
jgi|Trire2|103482|fgenesh5_pg.C_scaffold_2000070	103482	fgenesh5_pg.C_scaffold_2000070	1.68645	3.21864	3.69443	4.87514e-16	4.66061e-15	up in ∆ypr2		103482	TRIRE2_103482	2	230296	230333	1	413	-	-	-	-	-	-	-	-	-	-	-	transcriptional activator with ariadne RING finger	NCU02914	0	0	-	-	-	-	-	-	-	-	TRIREDRAFT_103482
jgi|Trire2|44700|estExt_Genewise1.C_20141	44700	estExt_Genewise1.C_20141	3.32421	10.0158	4.01052	7.58858e-77	5.79132e-75	up in ∆ypr2		44700	TRIRE2_44700	2	284581	284601	1	424	-	-	-	-	-	-	-	-	-	-	-	unknown protein, only present in ascomycota and Bacteriophage phBC6A51	-	-	-	ANID_06633	420	182785	183204	-	conserved hypothetical protein	I	0	TRIREDRAFT_44700
jgi|Trire2|120060|estExt_fgenesh5_pg.C_20141	120060	estExt_fgenesh5_pg.C_20141	1.17482	2.25765	7.75144	2.93146e-15	2.71244e-14	up in ∆ypr2		120060	TRIRE2_120060	2	479502	481865	1	472	-	-	-	-	-	-	-	-	-	-	-	unknown protein with pleckstrin like domain	NCU08047	0	0	ANID_06275	2397	115689	118085	-	conserved hypothetical protein	I	0	TRIREDRAFT_120060
jgi|Trire2|72137|kg2.C_scaffold_2000050	72137	kg2.C_scaffold_2000050	4.4769	22.2679	3.48227	1.69687e-91	1.82547e-89	up in ∆ypr2		72137	TRIRE2_72137	2	640486	640785	1	517	-	-	-	-	-	-	-	-	-	-	-	cytosceleton binding protein	-	-	-	ANID_03703	614	491984	492597	+	conserved hypothetical protein	II	0	TRIREDRAFT_72137
jgi|Trire2|103660|fgenesh5_pg.C_scaffold_2000248	103660	fgenesh5_pg.C_scaffold_2000248	2.37793	5.1979	2.0024	4.46416e-20	5.28654e-19	up in ∆ypr2		103660	TRIRE2_103660	2	794133	794234	1	557	-	-	-	-	-	-	-	-	-	-	-	orphan protein	-	-	-	-	-	-	-	-	-	-	-	TRIREDRAFT_103660
jgi|Trire2|2316|fgenesh1_pm.C_scaffold_2000105	2316	fgenesh1_pm.C_scaffold_2000105	3.1092	8.62904	5.55997	3.64023e-143	1.0485e-140	up in ∆ypr2	4	2316	TRIRE2_2316	2	806880	807007	1	562	-	-	-	-	-	-	-	-	-	-	-	unknown protein with caleosin domain	NCU09043	0	0	ANID_08591	1331	43386	44716	-	caleosin domain-containing protein	III	PF05042.5,PF05042.6,PF00036.24	TRIREDRAFT_2316
jgi|Trire2|55871|e_gw1.2.416.1	55871	e_gw1.2.416.1	2.66521	6.3432	1.37679	1.1322e-17	1.18794e-16	up in ∆ypr2	4	55871	TRIRE2_55871	2	808882	809595	1	563	-	-	-	-	-	-	-	-	-	-	-	Short-chain dehydrogenase/reductase	-	-	-	-	-	-	-	-	-	-	-	TRIREDRAFT_55871
jgi|Trire2|103668|fgenesh5_pg.C_scaffold_2000256	103668	fgenesh5_pg.C_scaffold_2000256	2.23084	4.69406	3.12118	1.45928e-32	3.12467e-31	up in ∆ypr2	4	103668	TRIRE2_103668	2	812333	812977	1	564	-	-	-	-	-	-	-	-	-	-	-	orphan protein	-	-	-	-	-	-	-	-	-	-	-	TRIREDRAFT_103668
jgi|Trire2|103671|fgenesh5_pg.C_scaffold_2000259	103671	fgenesh5_pg.C_scaffold_2000259	1.04659	2.06565	4.46883	7.93112e-15	7.12444e-14	up in ∆ypr2		103671	TRIRE2_103671	2	825713	825786	1	568	-	-	-	-	-	-	-	-	-	-	-	unknown protein	-	-	-	-	-	-	-	-	-	-	-	TRIREDRAFT_103671
jgi|Trire2|56026|e_gw1.2.1079.1	56026	e_gw1.2.1079.1	1.5979	3.02703	3.05699	1.94737e-17	2.02658e-16	up in ∆ypr2		56026	TRIRE2_56026	2	858932	859208	1	578	-	-	-	-	-	-	-	-	-	-	-	unknown protein	NCU04340	0	0	-	-	-	-	-	-	-	-	TRIREDRAFT_56026
jgi|Trire2|103683|fgenesh5_pg.C_scaffold_2000271	103683	fgenesh5_pg.C_scaffold_2000271	2.51174	5.70307	-1.31582	0.000915806	0.00236473	up in ∆ypr2		103683	TRIRE2_103683	2	871641	871703	1	580	-	-	-	-	-	-	-	-	-	-	-	orphan protein	-	-	-	-	-	-	-	-	-	-	-	TRIREDRAFT_103683
jgi|Trire2|103739|fgenesh5_pg.C_scaffold_2000327	103739	fgenesh5_pg.C_scaffold_2000327	1.42539	2.68588	3.83052	6.32793e-18	6.75863e-17	up in ∆ypr2		103739	TRIRE2_103739	2	1078063	1078311	1	629	-	-	-	-	-	-	-	-	-	-	-	Hsp27-ERE-TATA-binding protein/Scaffold attachment factor (SAF-B)	-	-	-	ANID_01192	1109	6701	7809	-	conserved hypothetical protein	VIII	0	TRIREDRAFT_103739
jgi|Trire2|44956|estExt_Genewise1.C_20626	44956	estExt_Genewise1.C_20626	3.27565	9.68428	9.63303	1.51315e-133	3.46433e-131	up in ∆ypr2		44956	TRIRE2_44956	2	1177473	1178632	1	650	-	-	-	-	-	-	-	-	-	-	-	MFS permease	NCU06341	0	0	ANID_01423	1608	53009	54616	+	MFS transporter	VII	PF07690.9,PF07690.8,PF00083.17	TRIREDRAFT_44956
jgi|Trire2|2358|fgenesh1_pm.C_scaffold_2000147	2358	fgenesh1_pm.C_scaffold_2000147	1.24915	2.37701	3.80827	3.57781e-15	3.29004e-14	up in ∆ypr2		2358	TRIRE2_2358	2	1183038	1183580	1	651	-	-	-	-	-	-	-	-	-	-	-	unknown protein with HIT domain	NCU08293	0	0	ANID_06189	595	165703	166297	-	HIT domain-containing protein	I	PF11969.1,PF01230.15,PF01230.16	TRIREDRAFT_2358
jgi|Trire2|56095|e_gw1.2.186.1	56095	e_gw1.2.186.1	2.2054	4.61202	3.39074	1.35087e-35	3.34125e-34	up in ∆ypr2		56095	TRIRE2_56095	2	1191744	1192389	1	654	-	-	-	-	-	-	-	-	-	-	-	MFS permease	-	-	-	ANID_00201	1824	152829	154652	-	MFS multidrug transporter	VIII	PF07690.9,PF07690.8	TRIREDRAFT_56095
jgi|Trire2|103774|fgenesh5_pg.C_scaffold_2000362	103774	fgenesh5_pg.C_scaffold_2000362	1.54408	2.91617	-0.294148	0.00123651	0.00311888	up in ∆ypr2	5	103774	TRIRE2_103774	2	1218065	1218241	1	663	-	-	-	-	-	-	-	-	-	-	-	orphan protein	-	-	-	-	-	-	-	-	-	-	-	TRIREDRAFT_103774
jgi|Trire2|44965|estExt_Genewise1.C_20657	44965	estExt_Genewise1.C_20657	3.67463	12.7695	6.2046	2.88112e-208	6.43138e-205	up in ∆ypr2	5	44965	TRIRE2_44965	2	1220280	1220558	1	664	-	-	-	-	-	-	-	-	-	-	-	zinc binding oxidoreductase	NCU11395	0	0	ANID_02470	1891	3928	5818	+	alcohol dehydrogenase	VII	PF00107.18,PF08240.5,PF08240.4	TRIREDRAFT_44965
jgi|Trire2|55837|e_gw1.2.36.1	55837	e_gw1.2.36.1	1.85845	3.62618	5.91457	9.51784e-26	1.50416e-24	up in ∆ypr2	5	55837	TRIRE2_55837	2	1223986	1227438	1	665	-	-	-	-	-	-	-	-	-	-	-	Adenine phosphoribosyl transferases	-	-	-	-	-	-	-	-	-	-	-	TRIREDRAFT_55837
jgi|Trire2|44967|estExt_Genewise1.C_20662	44967	estExt_Genewise1.C_20662	2.98577	7.92149	9.7189	3.11171e-31	6.37258e-30	up in ∆ypr2	5	44967	TRIRE2_44967	2	1227798	1228532	1	666	-	-	-	-	-	-	-	-	-	-	-	unknown protein,	NCU08154	0	0	ANID_04127	882	116369	117250	+	conserved hypothetical protein	II	0	TRIREDRAFT_44967
jgi|Trire2|55374|e_gw1.2.996.1	55374	e_gw1.2.996.1	1.45518	2.74191	1.41468	0.000298962	0.000845024	up in ∆ypr2		55374	TRIRE2_55374	2	1242446	1243432	1	673	Heterotrimeric G-protein pathway	0	GPCRs	7-TM receptor	XII (family C-like)	130836	179509	0	-	-	-	GPCR XII	NCU06629	0	0	ANID_08601	951	71501	72451	+	conserved hypothetical protein	III	PF11309.1	TRIREDRAFT_55374
jgi|Trire2|39637|gw1.2.947.1	39637	gw1.2.947.1	2.53636	5.80125	3.13615	1.06409e-39	3.04527e-38	up in ∆ypr2		39637	TRIRE2_39637	2	1259267	1259349	1	676	-	-	-	-	-	-	-	-	-	-	-	C4-dicarboxylate transporter/malic acid transport protein	-	-	-	ANID_09133	1420	227876	229295	-	sulfite transporter Ssu1	IV	PF03595.9,PF03595.10,TIGR00816	TRIREDRAFT_39637
jgi|Trire2|44987|estExt_Genewise1.C_20693	44987	estExt_Genewise1.C_20693	1.19574	2.29062	7.4728	9.96908e-06	3.59652e-05	up in ∆ypr2		44987	TRIRE2_44987	2	1265105	1265115	1	678	-	-	-	-	-	-	-	-	\N	sterol desaturase-like protein	homologous to ERG25 C-4 methylsterol oxidase; catalyzes the first step in the removal of the two C-4 methyl groups of 4,4-dimethylzymosterol (by similarity)	ERG25 methylsterol desaturase, SUR2-type hydroxylase/desaturase, catalytic region	NCU06402	0	0	ANID_06973	1379	5039	6417	-	C-4 methyl sterol oxidase Erg25	IV	PF04116.6,PF04116.5	TRIREDRAFT_44987
jgi|Trire2|103801|fgenesh5_pg.C_scaffold_2000389	103801	fgenesh5_pg.C_scaffold_2000389	1.27674	2.42291	0.01979	0.00377468	0.00858047	up in ∆ypr2		103801	TRIRE2_103801	2	1284346	1284509	1	686	-	-	-	-	-	-	-	-	-	-	-	unknown protein	-	-	-	-	-	-	-	-	-	-	-	TRIREDRAFT_103801
jgi|Trire2|103813|fgenesh5_pg.C_scaffold_2000401	103813	fgenesh5_pg.C_scaffold_2000401	2.82352	7.07887	-1.50831	0.0011916	0.00301154	up in ∆ypr2		103813	TRIRE2_103813	2	1311493	1313346	1	694	-	-	-	-	-	-	-	-	-	-	-	Serine/threonine protein kinase	-	-	-	-	-	-	-	-	-	-	-	TRIREDRAFT_103813
jgi|Trire2|40374|gw1.2.982.1	40374	gw1.2.982.1	1.19067	2.28259	2.08145	2.37982e-07	1.07104e-06	up in ∆ypr2		40374	TRIRE2_40374	2	1316059	1316178	1	695	-	-	-	-	-	-	-	-	-	-	-	unknown protein	NCU00872	0	0	-	-	-	-	-	-	-	-	TRIREDRAFT_40374
jgi|Trire2|103825|fgenesh5_pg.C_scaffold_2000413	103825	fgenesh5_pg.C_scaffold_2000413	1.66991	3.18195	2.41079	1.35611e-14	1.19651e-13	up in ∆ypr2		103825	TRIRE2_103825	2	1339857	1340782	1	705	CAZymes	0	Carbohydrate esterase	Carbohydrate esterase family16	0	32980	59637	0	-	-	-	CE16 acetyl esterase	-	-	-	-	-	-	-	-	-	-	-	TRIREDRAFT_103825
jgi|Trire2|21509|estExt_fgenesh1_pm.C_20182	21509	estExt_fgenesh1_pm.C_20182	2.03659	4.10275	5.98026	1.73711e-75	1.27137e-73	up in ∆ypr2		21509	TRIRE2_21509	2	1414888	1415073	1	723	-	-	-	-	-	-	-	-	\N	blue light inducible protein	hypothetical blue light inducible protein with FMN-binding split barrel, related to N. crassa BLI-3	blue light inducible protein BLI-3	NCU07267	bli-3	0	-	-	-	-	-	-	-	-	TRIREDRAFT_21509
jgi|Trire2|72183|kg2.C_scaffold_2000096	72183	kg2.C_scaffold_2000096	1.27506	2.4201	1.80018	0.00107545	0.00274127	up in ∆ypr2		72183	TRIRE2_72183	2	1476132	1476580	1	738	Effector proteins (competition and defense)	0	Proteins with known effector domains	0	IPR011058 Cyanovirin-N	32885	51902	YHR178W	\N	Cyanovirin-N domain-containing protein	Cyanovirin-N domain	orphan protein	-	-	-	-	-	-	-	-	-	-	-	TRIREDRAFT_72183
jgi|Trire2|103866|fgenesh5_pg.C_scaffold_2000454	103866	fgenesh5_pg.C_scaffold_2000454	1.79167	3.46215	3.65559	1.00467e-07	4.75143e-07	up in ∆ypr2		103866	TRIRE2_103866	2	1484674	1485493	1	742	Effector proteins (competition and defense)	0	Tandem repeat proteins	0	Tandem repeats	301255	224140	0	-	-	-	orphan protein	-	-	-	-	-	-	-	-	-	-	-	TRIREDRAFT_103866
jgi|Trire2|2399|fgenesh1_pm.C_scaffold_2000188	2399	fgenesh1_pm.C_scaffold_2000188	2.0288	4.08065	3.68912	5.43828e-34	1.2419e-32	up in ∆ypr2		2399	TRIRE2_2399	2	1501929	1502379	1	745	-	-	-	-	-	-	-	-	-	-	-	unknown protein	-	-	-	-	-	-	-	-	-	-	-	TRIREDRAFT_2399
jgi|Trire2|55179|e_gw1.2.333.1	55179	e_gw1.2.333.1	1.39174	2.62396	4.25338	2.63337e-18	2.86748e-17	up in ∆ypr2	6	55179	TRIRE2_55179	2	1581411	1581994	1	761	-	-	-	-	-	-	-	-	\N	Arginase/agmatinase/formimionoglutamate hydrolase	SpeB, Arginase/agmatinase/formimionoglutamate hydrolase, shares identity with hypothetical protein FG05446.1 [Gibberella zeae PH-1]	Arginase family protein	NCU11320	0	0	ANID_07488	1455	206271	207725	-	agmatinase	IV	PF00491.13,PF00491.14,TIGR01230	TRIREDRAFT_55179
jgi|Trire2|55723|e_gw1.2.260.1	55723	e_gw1.2.260.1	2.31989	4.99293	2.29079	1.25996e-20	1.54324e-19	up in ∆ypr2	6	55723	TRIRE2_55723	2	1583513	1585036	1	762	-	-	-	-	-	-	-	-	\N	Amino acid transporter	hypothetical PotE	PotE	-	-	-	-	-	-	-	-	-	-	-	TRIREDRAFT_55723
jgi|Trire2|120228|estExt_fgenesh5_pg.C_20479	120228	estExt_fgenesh5_pg.C_20479	1.08472	2.12097	3.27626	8.01751e-11	5.26886e-10	up in ∆ypr2	6	120228	TRIRE2_120228	2	1585677	1586268	1	763	Transcription factors	OefC	Zn2Cys6	0	C6 transcription factor OefC	86655	127080	YDL170W	-	-	-	Zn2Cys6 transcriptional regulatorOefC	-	-	-	-	-	-	-	-	-	-	-	TRIREDRAFT_120228
jgi|Trire2|74971|estExt_GeneWisePlus.C_20852	74971	estExt_GeneWisePlus.C_20852	1.47862	2.78682	4.24484	7.08076e-22	9.35268e-21	up in ∆ypr2		74971	TRIRE2_74971	2	1625803	1625965	1	774	-	-	-	-	-	-	-	-	-	-	-	unknown protein	-	-	-	ANID_00033	1237	111162	112398	+	conserved hypothetical protein	VIII	PF11905.1	TRIREDRAFT_74971
jgi|Trire2|120248|estExt_fgenesh5_pg.C_20516	120248	estExt_fgenesh5_pg.C_20516	1.05202	2.07344	4.35658	1.81257e-13	1.46998e-12	up in ∆ypr2		120248	TRIRE2_120248	2	1717562	1717908	1	795	-	-	-	-	-	-	-	-	-	-	-	unknown protein	-	-	-	-	-	-	-	-	-	-	-	TRIREDRAFT_120248
jgi|Trire2|75027|estExt_GeneWisePlus.C_20966	75027	estExt_GeneWisePlus.C_20966	1.94241	3.84347	6.3849	9.68371e-60	4.77712e-58	up in ∆ypr2		75027	TRIRE2_75027	2	1820132	1821468	1	823	-	-	-	-	-	-	-	-	-	-	-	unknown protein	NCU03462	0	0	ANID_05568	2956	86900	89855	+	leucine Rich Repeat domain-containing protein	V	0	TRIREDRAFT_75027
jgi|Trire2|112459|fgenesh5_pg.C_scaffold_40000019	112459	fgenesh5_pg.C_scaffold_40000019	1.01614	2.0225	1.40624	0.000191068	0.000556804	up in ∆ypr2		112459	TRIRE2_112459	40	50778	51251	1	904	-	-	-	-	-	-	-	-	-	-	-	orphan protein	-	-	-	-	-	-	-	-	-	-	-	TRIREDRAFT_112459
jgi|Trire2|78542|estExt_GeneWisePlus.C_110041	78542	estExt_GeneWisePlus.C_110041	1.04404	2.06199	6.2274	1.49409e-20	1.825e-19	up in ∆ypr2		78542	TRIRE2_78542	11	75131	77557	1	937	Lipid Metabolism	0	lipase	phospholipase	Lysophospholipase	154919	48339	YMR008C	-	-	-	cytosolic phospholipase A2, putative	NCU08298	0	0	ANID_06211	2707	252236	254942	+	phospholipase A2	I	PF01735.11	TRIREDRAFT_78542
jgi|Trire2|48747|estExt_Genewise1.C_110047	48747	estExt_Genewise1.C_110047	1.48685	2.80277	4.58711	3.00123e-20	3.60673e-19	up in ∆ypr2		48747	TRIRE2_48747	11	81288	82709	1	939	-	-	-	-	-	-	-	-	-	-	-	unknown protein	NCU06376	0	0	ANID_05453	1672	224223	225894	+	arrestin domain-containing protein	V	PF00339.22,PF04426.5	TRIREDRAFT_48747
jgi|Trire2|62977|e_gw1.11.556.1	62977	e_gw1.11.556.1	2.80952	7.01052	0.343256	1.00543e-08	5.32155e-08	up in ∆ypr2		62977	TRIRE2_62977	11	86270	87028	1	940	-	-	-	-	-	-	-	-	-	-	-	nucleoside diphosphate sugar epimerase, secreted	-	-	-	-	-	-	-	-	-	-	-	TRIREDRAFT_62977
jgi|Trire2|122187|estExt_fgenesh5_pg.C_110032	122187	estExt_fgenesh5_pg.C_110032	1.83161	3.55933	1.50306	4.23258e-10	2.59387e-09	up in ∆ypr2		122187	TRIRE2_122187	11	93494	94015	1	943	-	-	-	-	-	-	-	-	-	-	-	unknown protein	-	-	-	-	-	-	-	-	-	-	-	TRIREDRAFT_122187
jgi|Trire2|122198|estExt_fgenesh5_pg.C_110052	122198	estExt_fgenesh5_pg.C_110052	1.16906	2.24865	6.79186	8.75826e-22	1.14835e-20	up in ∆ypr2		122198	TRIRE2_122198	11	150816	151661	1	961	-	-	-	-	-	-	-	-	-	-	-	orphan protein	NCU05311	0	0	-	-	-	-	-	-	-	-	TRIREDRAFT_122198
jgi|Trire2|78585|estExt_GeneWisePlus.C_110111	78585	estExt_GeneWisePlus.C_110111	3.47516	11.1206	3.336	1.36749e-55	6.04471e-54	up in ∆ypr2		78585	TRIRE2_78585	11	169951	170561	1	968	-	-	-	-	-	-	-	-	-	-	-	MFS permease	-	-	-	-	-	-	-	-	-	-	-	TRIREDRAFT_78585
jgi|Trire2|62985|e_gw1.11.183.1	62985	e_gw1.11.183.1	1.11993	2.17337	5.99224	1.07744e-30	2.14743e-29	up in ∆ypr2		62985	TRIRE2_62985	11	242225	243136	1	984	CAZymes	0	Carbohydrate esterase	Carbohydrate esterase family10	0	301308	17079	YDR428C	-	-	-	CE10 lipase/esterase	NCU07081	0	0	ANID_00313	1014	60527	61540	-	lipase	VIII	PF07859.5,PF07859.6,PF00135.21	TRIREDRAFT_62985
jgi|Trire2|39942|gw1.11.503.1	39942	gw1.11.503.1	1.65216	3.14305	6.96741	7.76879e-27	1.27514e-25	up in ∆ypr2		39942	TRIRE2_39942	11	261825	262139	1	989	CAZymes	0	Glycoside hydrolase	Glycoside hydrolase family17	candidate b-glycosidase distantly related to exo-1,3-glucanase	301307	181202	YGR282C	\N	Glycoside Hydrolase Family 17, beta-1,3-endoglucanase	\N	GH17 glucan endo-1,3-?-glucosidase	NCU06381	0	0	ANID_07950	1672	227830	229501	-	beta-1,3-endoglucanase	II	0	TRIREDRAFT_39942
jgi|Trire2|4231|fgenesh1_pm.C_scaffold_11000048	4231	fgenesh1_pm.C_scaffold_11000048	1.66006	3.16029	6.10688	3.64174e-30	7.00799e-29	up in ∆ypr2		4231	TRIRE2_4231	11	324329	324593	1	1005	Transcription factors	0	GATA type zinc finger	0	GATA transcription factor	174504	192933	YFL021W	\N	Zn-finger GATA type domain-containing protein	GATA-binding transcription factors specifically bind the DNA sequence (A/T)GATA(A/G). Two GATA zinc fingers are found in the GATA transcription factors. However there are several proteins which only contains a single copy of the domain.	GATA type transcriptional regulator	NCU07728	sre	0	ANID_00176	1765	97554	99318	+	siderophore biosynthesis repressor SREA	VIII	PF00320.19,PF00320.20	TRIREDRAFT_4231
jgi|Trire2|108143|fgenesh5_pg.C_scaffold_11000116	108143	fgenesh5_pg.C_scaffold_11000116	1.58009	2.98988	5.45488	4.63844e-29	8.46967e-28	up in ∆ypr2		108143	TRIRE2_108143	11	346066	346193	1	1010	-	-	-	-	-	-	-	-	-	-	-	orphan protein	-	-	-	-	-	-	-	-	-	-	-	TRIREDRAFT_108143
jgi|Trire2|108145|fgenesh5_pg.C_scaffold_11000118	108145	fgenesh5_pg.C_scaffold_11000118	2.54309	5.82837	2.31429	1.75221e-26	2.85502e-25	up in ∆ypr2		108145	TRIRE2_108145	11	352981	353163	1	1012	-	-	-	-	-	-	-	-	-	-	-	orphan protein	-	-	-	-	-	-	-	-	-	-	-	TRIREDRAFT_108145
jgi|Trire2|4240|fgenesh1_pm.C_scaffold_11000057	4240	fgenesh1_pm.C_scaffold_11000057	3.22959	9.38001	2.38243	9.93708e-36	2.47844e-34	up in ∆ypr2		4240	TRIRE2_4240	11	419373	420773	1	1028	-	-	-	-	-	-	-	-	-	-	-	stress response protein Rds1; secreted	NCU05143	0	0	ANID_07640	1519	103726	105244	-	stress response protein	IV	0	TRIREDRAFT_4240
jgi|Trire2|108191|fgenesh5_pg.C_scaffold_11000164	108191	fgenesh5_pg.C_scaffold_11000164	1.26624	2.40533	0.889459	4.85118e-05	0.000157056	up in ∆ypr2		108191	TRIRE2_108191	11	513931	514977	1	1052	-	-	-	-	-	-	-	-	-	-	-	unknown protein	NCU06627	0	0	-	-	-	-	-	-	-	-	TRIREDRAFT_108191
jgi|Trire2|78695|estExt_GeneWisePlus.C_110282	78695	estExt_GeneWisePlus.C_110282	1.15229	2.22267	7.84283	6.80229e-19	7.61124e-18	up in ∆ypr2		78695	TRIRE2_78695	11	521942	523225	1	1053	-	-	-	-	-	-	-	-	\N	Conserved hypothetical protein	Possible homologue of yeast ZPR1, an essential protein with zinc finger motif that binds to translation elongation factor Tef1p.	unknown protein	NCU08507	0	0	ANID_02455	1613	91445	93057	-	zinc finger protein ZPR1	VII	TIGR00310,PF03367.5,PF03367.6	TRIREDRAFT_78695
jgi|Trire2|122271|estExt_fgenesh5_pg.C_110178	122271	estExt_fgenesh5_pg.C_110178	1.26104	2.39668	5.08525	1.22277e-26	1.996e-25	up in ∆ypr2		122271	TRIRE2_122271	11	577186	577875	1	1068	-	-	-	-	-	-	-	-	-	-	-	Zn2Cys6 transcription regulator, C. albicans Fcr1	-	-	-	-	-	-	-	-	-	-	-	TRIREDRAFT_122271
jgi|Trire2|78713|estExt_GeneWisePlus.C_110315	78713	estExt_GeneWisePlus.C_110315	1.33561	2.52382	3.34512	1.09221e-15	1.02656e-14	up in ∆ypr2		78713	TRIRE2_78713	11	588184	588969	1	1070	CAZymes	0	Glycoside hydrolase	Glycoside hydrolase family72	candidate b-1,3-glucanosyltransferase	153706	40106	YLR343W	-	-	-	GH72 ߀-(1-3) glucanosyltransferase	NCU06850	gel-5	0	-	-	-	-	-	-	-	-	TRIREDRAFT_78713
jgi|Trire2|122284|estExt_fgenesh5_pg.C_110199	122284	estExt_fgenesh5_pg.C_110199	1.16196	2.23762	8.24876	4.36316e-17	4.43721e-16	up in ∆ypr2		122284	TRIRE2_122284	11	645085	646655	1	1085	Secondary metabolism	vel1	Cluster expression	Velvet protein complex	0	42972	164251	0	\N	red and blue light sensing protein	related to the red and blue light sensing protein velvet in A. nidulans	vel1, velvet protein	NCU01731	ve-1	0	ANID_01052	2332	25186	27517	+	conserved hypothetical protein	VIII	PF11754.1	TRIREDRAFT_122284
jgi|Trire2|122324|estExt_fgenesh5_pg.C_110278	122324	estExt_fgenesh5_pg.C_110278	4.08025	16.9152	6.18466	6.06518e-251	2.7078e-247	up in ∆ypr2		122324	TRIRE2_122324	11	909648	909812	1	1148	-	-	-	-	-	-	-	-	-	-	-	SSCRP	-	-	-	-	-	-	-	-	-	-	-	TRIREDRAFT_122324
jgi|Trire2|108333|fgenesh5_pg.C_scaffold_11000306	108333	fgenesh5_pg.C_scaffold_11000306	1.13033	2.18909	3.6412	1.06407e-10	6.88485e-10	up in ∆ypr2		108333	TRIRE2_108333	11	988852	991062	1	1169	-	-	-	-	-	-	-	-	-	-	-	unknown protein	-	-	-	-	-	-	-	-	-	-	-	TRIREDRAFT_108333
jgi|Trire2|49048|estExt_Genewise1.C_110543	49048	estExt_Genewise1.C_110543	1.04217	2.05932	4.27481	7.36282e-13	5.70682e-12	up in ∆ypr2	7	49048	TRIRE2_49048	11	1064209	1067165	1	1187	RNAi	rdr3	0	0	Related to RNA-directed RNA polymerase (RdRP)	317554	10390	0	-	-	-	RNA-dependent RNA-polymerase	NCU08435	rrp3	0	ANID_02717	3891	14235	18125	-	RNA-dependent RNA polymerase	VI	PF05183.4,PF05183.5	TRIREDRAFT_49048
jgi|Trire2|108354|fgenesh5_pg.C_scaffold_11000327	108354	fgenesh5_pg.C_scaffold_11000327	2.25669	4.77894	-1.18544	0.00297774	0.00692762	up in ∆ypr2	7	108354	TRIRE2_108354	11	1068828	1069472	1	1188	-	-	-	-	-	-	-	-	-	-	-	orphan protein	-	-	-	-	-	-	-	-	-	-	-	TRIREDRAFT_108354
jgi|Trire2|62872|e_gw1.11.538.1	62872	e_gw1.11.538.1	2.36554	5.15345	3.89783	8.01824e-11	5.26886e-10	up in ∆ypr2	7	62872	TRIRE2_62872	11	1072278	1072459	1	1189	-	-	-	-	-	-	-	-	-	-	-	unknown protein GPR1/FUN34/yaaH-like	-	-	-	ANID_08390	1016	31314	32329	-	plasma membrane ammonium transporter	Unmapped scaffolds	PF01184.12	TRIREDRAFT_62872
jgi|Trire2|122350|estExt_fgenesh5_pg.C_110334	122350	estExt_fgenesh5_pg.C_110334	1.11169	2.16099	6.76868	2.76342e-26	4.47003e-25	up in ∆ypr2		122350	TRIRE2_122350	11	1109261	1109314	1	1197	-	-	-	-	-	-	-	-	\N	Glutamate decarboxylase	\N	Glutamate decarboxylase	NCU06803	0	0	ANID_05447	1894	199831	201724	+	glutamate decarboxylase	V	PF00282.11,PF00282.12,TIGR01788	TRIREDRAFT_122350
jgi|Trire2|40156|gw1.32.100.1	40156	gw1.32.100.1	1.08256	2.11779	3.01218	2.13476e-09	1.21409e-08	up in ∆ypr2		40156	TRIRE2_40156	32	14227	14302	1	1215	Heterotrimeric G-protein pathway	0	GPCRs	7-TM receptor	PTH11-like	158188	39171	0	-	-	-	PTH11 GPCR	NCU05854	0	0	ANID_08971	1533	23214	24746	-	integral membrane protein	VII	0	TRIREDRAFT_40156
jgi|Trire2|70092|e_gw1.32.86.1	70092	e_gw1.32.86.1	1.16275	2.23883	3.03399	3.16211e-10	1.95124e-09	up in ∆ypr2		70092	TRIRE2_70092	32	60853	61044	1	1225	-	-	-	-	-	-	-	-	-	-	-	unknown protein	NCU05500	0	0	-	-	-	-	-	-	-	-	TRIREDRAFT_70092
jgi|Trire2|124051|estExt_fgenesh5_pg.C_320018	124051	estExt_fgenesh5_pg.C_320018	1.35453	2.55714	2.28129	2.02619e-06	8.14217e-06	up in ∆ypr2		124051	TRIRE2_124051	32	70429	70873	1	1230	-	-	-	-	-	-	-	-	-	-	-	alpha/beta hydrolase	NCU09992	0	0	-	-	-	-	-	-	-	-	TRIREDRAFT_124051
jgi|Trire2|70098|e_gw1.32.17.1	70098	e_gw1.32.17.1	2.57696	5.96682	3.88125	4.53672e-51	1.78451e-49	up in ∆ypr2		70098	TRIRE2_70098	32	75812	75852	1	1231	-	-	-	-	-	-	-	-	\N	GABA permease	COG0531, PotE, Amino acid transporters	amino acid permease (GABA)	-	-	-	ANID_02962	2635	463509	466143	-	GABA permease	VI	TIGR00907,PF00324.14	TRIREDRAFT_70098
jgi|Trire2|124056|estExt_fgenesh5_pg.C_320027	124056	estExt_fgenesh5_pg.C_320027	3.37783	10.3951	5.00529	5.10926e-82	4.42919e-80	up in ∆ypr2		124056	TRIRE2_124056	32	102422	103142	1	1238	-	-	-	-	-	-	-	-	-	-	-	phosphatidic acid phosphatase	-	-	-	ANID_08786	1064	165659	166722	-	conserved hypothetical protein	III	0	TRIREDRAFT_124056
jgi|Trire2|23382|estExt_fgenesh1_pm.C_320015	23382	estExt_fgenesh1_pm.C_320015	1.27581	2.42135	0.695469	0.000526672	0.00142203	up in ∆ypr2		23382	TRIRE2_23382	32	175571	175870	1	1255	-	-	-	-	-	-	-	-	-	-	-	aldehyde reductase AKR7	-	-	-	-	-	-	-	-	-	-	-	TRIREDRAFT_23382
jgi|Trire2|112085|fgenesh5_pg.C_scaffold_32000046	112085	fgenesh5_pg.C_scaffold_32000046	1.84777	3.59943	1.96491	1.77645e-11	1.24798e-10	up in ∆ypr2		112085	TRIRE2_112085	32	177043	177126	1	1256	Transcription factors	0	Zn2Cys6	0	hypothetical protein	0	228115	YPL248C	-	-	-	Zn2Cys6 transcriptional regulator	-	-	-	-	-	-	-	-	-	-	-	TRIREDRAFT_112085
jgi|Trire2|70001|e_gw1.32.32.1	70001	e_gw1.32.32.1	3.88223	14.7458	-0.735687	1.11462e-07	5.23536e-07	up in ∆ypr2		70001	TRIRE2_70001	32	186204	186529	1	1259	-	-	-	-	-	-	-	-	-	-	-	unknown protein	-	-	-	-	-	-	-	-	-	-	-	TRIREDRAFT_70001
jgi|Trire2|70373|e_gw1.35.52.1	70373	e_gw1.35.52.1	1.65142	3.14143	7.76484	1.9783e-39	5.60771e-38	up in ∆ypr2		70373	TRIRE2_70373	35	114477	114689	1	1281	CAZymes	0	Glycoside hydrolase	Glycoside hydrolase family125	0	296901	184596	0	-	-	-	GH125 protein	-	-	-	-	-	-	-	-	-	-	-	TRIREDRAFT_70373
jgi|Trire2|5942|fgenesh1_pm.C_scaffold_35000015	5942	fgenesh1_pm.C_scaffold_35000015	1.02811	2.03935	4.12613	3.4798e-10	2.13694e-09	up in ∆ypr2		5942	TRIRE2_5942	35	112435	113172	1	1282	-	-	-	-	-	-	-	-	-	-	-	unknown protein	-	-	-	ANID_06361	765	391129	391893	-	conserved hypothetical protein	I	0	TRIREDRAFT_5942
jgi|Trire2|70375|e_gw1.35.44.1	70375	e_gw1.35.44.1	1.67782	3.19944	5.17988	2.10929e-40	6.21578e-39	up in ∆ypr2		70375	TRIRE2_70375	35	82967	83299	1	1290	-	-	-	-	-	-	-	-	\N	amidase	pfam01425, Amidase	amidase	NCU10409	-	-	ANID_02662	1887	76276	78162	-	acetamidase	VI	PF01425.13,PF01425.14	TRIREDRAFT_70375
jgi|Trire2|112247|fgenesh5_pg.C_scaffold_35000030	112247	fgenesh5_pg.C_scaffold_35000030	1.03208	2.04497	3.14179	5.60519e-09	3.05734e-08	up in ∆ypr2		112247	TRIRE2_112247	35	75189	76331	1	1293	-	-	-	-	-	-	-	-	\N	beta-isopropylmalate dehydrogenase	pfam00180, Iso_dh, Isocitrate/isopropylmalate dehydrogenase	3-isopropylmalate dehydrogenase	-	-	-	-	-	-	-	-	-	-	-	TRIREDRAFT_112247
jgi|Trire2|70355|e_gw1.35.81.1	70355	e_gw1.35.81.1	2.2231	4.66897	5.75852	3.50604e-95	4.01351e-93	up in ∆ypr2		70355	TRIRE2_70355	35	67311	67418	1	1297	-	-	-	-	-	-	-	-	-	-	-	SAM-dependent methylransferase	NCU04907	0	0	-	-	-	-	-	-	-	-	TRIREDRAFT_70355
jgi|Trire2|112239|fgenesh5_pg.C_scaffold_35000022	112239	fgenesh5_pg.C_scaffold_35000022	4.22188	18.66	4.37522	8.71141e-125	1.72854e-122	up in ∆ypr2		112239	TRIRE2_112239	35	63526	65046	1	1298	-	-	-	-	-	-	-	-	-	-	-	unknown protein	-	-	-	-	-	-	-	-	-	-	-	TRIREDRAFT_112239
jgi|Trire2|82327|estExt_GeneWisePlus.C_350035	82327	estExt_GeneWisePlus.C_350035	1.57604	2.98149	5.25229	6.43582e-26	1.02434e-24	up in ∆ypr2		82327	TRIRE2_82327	35	48771	50596	1	1302	Transport	0	ABC transporter	transporter containing IPR003439 domain	Pleiotropic drug resistance proteins (PDR1-15), ABC superfamily, related to S.cerevisiae Pdr5p	314045	64931	YDR011W	-	-	-	PDR-type ABC transporters	-	-	-	ANID_03952	5341	168218	173558	-	ABC transporter	II	PF01061.17,PF03193.9,PF00005.19,PF06422.5,PF06422.4,PF00005.20,PF01061.16	TRIREDRAFT_82327
jgi|Trire2|82321|estExt_GeneWisePlus.C_350025	82321	estExt_GeneWisePlus.C_350025	5.60316	48.6093	5.40749	2.0433e-179	1.82447e-176	up in ∆ypr2		82321	TRIRE2_82321	35	30113	30370	1	1308	-	-	-	-	-	-	-	-	-	-	-	Aquaporin	-	-	-	ANID_10902	1141	101595	102735	-	aquaporin	IV	PF00230.12,PF00230.13,TIGR00861	TRIREDRAFT_82321
jgi|Trire2|70327|e_gw1.35.70.1	70327	e_gw1.35.70.1	2.20766	4.61924	0.369862	1.08418e-05	3.88311e-05	up in ∆ypr2		70327	TRIRE2_70327	35	16915	17508	1	1313	-	-	-	-	-	-	-	-	-	-	-	unknown protein	NCU03376	0	0	ANID_05289	1238	78136	79373	-	conserved hypothetical protein	V	0	TRIREDRAFT_70327
jgi|Trire2|70341|e_gw1.35.94.1	70341	e_gw1.35.94.1	1.22805	2.34251	1.67717	7.20344e-06	2.65126e-05	up in ∆ypr2		70341	TRIRE2_70341	35	6447	6549	1	1316	CAZymes	0	Glycoside hydrolase	Glycoside hydrolase family75	candidate b-glycosidase related to chitosanase	54365	87418	0	\N	Glycoside Hydrolase Family 75	candidate chitosanase	GH75 chitosanase	-	-	-	ANID_04686	1002	62199	63200	+	chitosanase	III	PF07335.3,PF07335.4	TRIREDRAFT_70341
jgi|Trire2|112560|fgenesh5_pg.C_scaffold_45000002	112560	fgenesh5_pg.C_scaffold_45000002	1.4446	2.72186	4.23334	3.56567e-23	4.97467e-22	up in ∆ypr2		112560	TRIRE2_112560	45	4791	4831	1	1319	Transcription factors	0	Zn2Cys6	0	conserved hypothetical protein	164242	115119	YML099C	-	-	-	Zn2Cys6 transcriptional regulator	-	-	-	ANID_06684	2268	40198	42465	-	conserved hypothetical protein	I	0	TRIREDRAFT_112560
jgi|Trire2|70932|e_gw1.45.9.1	70932	e_gw1.45.9.1	1.12309	2.17812	5.09513	3.42464e-23	4.78538e-22	up in ∆ypr2		70932	TRIRE2_70932	45	7049	7375	1	1320	-	-	-	-	-	-	-	-	-	-	-	MFS permease	-	-	-	ANID_10862	1678	69306	70983	+	efflux pump protein	I	PF07690.9,PF07690.8,PF00083.17	TRIREDRAFT_70932
jgi|Trire2|70961|e_gw1.45.34.1	70961	e_gw1.45.34.1	1.62554	3.08557	5.76616	8.89982e-58	4.20458e-56	up in ∆ypr2		70961	TRIRE2_70961	45	25415	25730	1	1327	-	-	-	-	-	-	-	-	-	-	-	dienelactone hydrolase	NCU09656	0	0	ANID_07139	1808	24056	25863	+	dienelactone hydrolase	IV	0	TRIREDRAFT_70961
jgi|Trire2|59900|e_gw1.7.736.1	59900	e_gw1.7.736.1	1.18065	2.26679	2.39868	1.12573e-08	5.9302e-08	up in ∆ypr2		59900	TRIRE2_59900	7	1407983	1409047	2	4	-	-	-	-	-	-	-	-	-	-	-	unknown protein	-	-	-	ANID_05409	1038	92583	93620	-	conserved hypothetical protein	V	PF01370.13,PF05368.6,PF01370.14	TRIREDRAFT_59900
jgi|Trire2|60560|e_gw1.7.476.1	60560	e_gw1.7.476.1	4.14595	17.7033	0.291382	5.10078e-15	4.65694e-14	up in ∆ypr2		60560	TRIRE2_60560	7	1406821	1407137	2	5	-	-	-	-	-	-	-	-	-	-	-	unknown protein	-	-	-	-	-	-	-	-	-	-	-	TRIREDRAFT_60560
jgi|Trire2|59791|e_gw1.7.769.1	59791	e_gw1.7.769.1	1.40749	2.65276	3.31194	1.95833e-12	1.48312e-11	up in ∆ypr2		59791	TRIRE2_59791	7	1398241	1399272	2	8	CAZymes	chi18-15/chit36	Glycoside hydrolase	Glycoside hydrolase family18	candidate chitinase related to bacterial chitinases, does not belong to a fungal subgroup	83999	89999	0	chi18-15	glycoside hydrolase family 18, chitinase	chitinase, precursor protein, glycoside hydrolase family 18, involved in mycoparasitism (PMID: 11425470, 12478390)	GH18, chitinase CHI18-15	-	-	-	-	-	-	-	-	-	-	-	TRIREDRAFT_59791
jgi|Trire2|106706|fgenesh5_pg.C_scaffold_7000507	106706	fgenesh5_pg.C_scaffold_7000507	1.01577	2.02199	5.23067	3.7219e-16	3.57342e-15	up in ∆ypr2		106706	TRIRE2_106706	7	1386797	1387505	2	13	Transcription factors	0	Zn2Cys6	0	predicted protein	0	0	YBR240C	-	-	-	Zn2Cys6 transcriptional regulator	-	-	-	-	-	-	-	-	-	-	-	TRIREDRAFT_106706
jgi|Trire2|41208|gw1.7.789.1	41208	gw1.7.789.1	1.17718	2.26134	5.25963	1.57586e-28	2.8198e-27	up in ∆ypr2		41208	TRIRE2_41208	7	1384838	1385791	2	14	-	-	-	-	-	-	-	-	-	-	-	metallophosphoesterase domain-containing protein, putative	NCU01093	0	0	-	-	-	-	-	-	-	-	TRIREDRAFT_41208
jgi|Trire2|121498|estExt_fgenesh5_pg.C_70496	121498	estExt_fgenesh5_pg.C_70496	3.45762	10.9862	5.63365	6.13733e-111	9.28817e-109	up in ∆ypr2		121498	TRIRE2_121498	7	1378529	1379202	2	16	-	-	-	-	-	-	-	-	\N	hypothetical protein	similar to phosphatidylserine decarboxylase	Phosphatidylserine decarboxylase	NCU02302	0	0	ANID_11161	1392	178709	180100	+	phosphatidylserine decarboxylase	VII	PF02666.7,PF12588.1,PF02666.8	TRIREDRAFT_121498
jgi|Trire2|106697|fgenesh5_pg.C_scaffold_7000498	106697	fgenesh5_pg.C_scaffold_7000498	3.64007	12.4672	-0.926673	1.27712e-06	5.25018e-06	up in ∆ypr2		106697	TRIRE2_106697	7	1371592	1371705	2	19	-	-	-	-	-	-	-	-	-	-	-	esterase/lipase, HGT	-	-	-	ANID_07083	1012	74776	75787	-	conserved hypothetical protein	IV	PF02129.11	TRIREDRAFT_106697
jgi|Trire2|106695|fgenesh5_pg.C_scaffold_7000496	106695	fgenesh5_pg.C_scaffold_7000496	1.01438	2.02004	4.03925	1.25604e-10	8.06845e-10	up in ∆ypr2		106695	TRIRE2_106695	7	1366189	1366778	2	21	Sulfur metabolism	0	sulfur assimilation	EC number 1.8.3.1	sulfite oxidase	146350	231246	0	-	-	-	Sulfite oxidase, molybdopterin-binding component	NCU04474	0	0	-	-	-	-	-	-	-	-	TRIREDRAFT_106695
jgi|Trire2|60018|e_gw1.7.429.1	60018	e_gw1.7.429.1	1.18648	2.27597	0.203622	0.00278481	0.00653326	up in ∆ypr2		60018	TRIRE2_60018	7	1364391	1365119	2	22	-	-	-	-	-	-	-	-	-	-	-	AAA+ ATPase	-	-	-	ANID_11942	774	285082	285855	-	phosphoribulokinase/uridine kinase	II	0	TRIREDRAFT_60018
jgi|Trire2|47479|estExt_Genewise1.C_70798	47479	estExt_Genewise1.C_70798	1.12037	2.17403	4.11151	4.24517e-14	3.63773e-13	up in ∆ypr2		47479	TRIRE2_47479	7	1361823	1361887	2	23	Transcription factors	0	Fungal-trans	0	predicted protein	134299	48130	YPL248C	-	-	-	Zn2Cys6 transcriptional regulator	-	-	-	ANID_08111	2421	287458	289878	-	conserved hypothetical protein	II	PF00172.11,PF00172.10,PF04082.10,PF04082.11	TRIREDRAFT_47479
jgi|Trire2|121491|estExt_fgenesh5_pg.C_70483	121491	estExt_fgenesh5_pg.C_70483	2.37908	5.20204	9.27363	2.41465e-29	4.49176e-28	up in ∆ypr2		121491	TRIRE2_121491	7	1352906	1353491	2	25	CAZymes	0	Glycosyl transferase	Glycosyl transferase family4	0	77441	83336	YGL065C	\N	Glycosyltransferase Family 4	candidate a,a-trehalose phosphorylase/synthase	GT4 ?,?'-trehalose phosphorylase/synthase	NCU09559	ccg-9	0	ANID_05021	2476	509196	511671	+	trehalose synthase	III	PF00534.13,PF00534.12	TRIREDRAFT_121491
jgi|Trire2|60458|e_gw1.7.521.1	60458	e_gw1.7.521.1	1.14052	2.20461	3.18823	4.26974e-09	2.36212e-08	up in ∆ypr2		60458	TRIRE2_60458	7	1346092	1349707	2	26	Secondary metabolism	tex19	Nonribosomal peptide synthetase		Nonribosomal peptide synthetase	229608	224342	YBR115C	\N	non-ribosomal peptide synthetase	candidate non-ribosomal peptide synthetase	NRPS	-	-	-	ANID_08504	2834	399039	401872	-	conserved hypothetical protein	Unmapped scaffolds	PF00550.17,PF07727.7,PF00668.13,PF00550.18,PF00501.21,PF00668.12	TRIREDRAFT_60458
jgi|Trire2|106684|fgenesh5_pg.C_scaffold_7000485	106684	fgenesh5_pg.C_scaffold_7000485	1.80271	3.48876	0.234337	1.37804e-05	4.83859e-05	up in ∆ypr2		106684	TRIRE2_106684	7	1329068	1329383	2	29	-	-	-	-	-	-	-	-	-	-	-	unknown protein	NCU10595	0	0	-	-	-	-	-	-	-	-	TRIREDRAFT_106684
jgi|Trire2|60565|e_gw1.7.603.1	60565	e_gw1.7.603.1	1.05127	2.07236	3.12099	2.67937e-08	1.35778e-07	up in ∆ypr2		60565	TRIRE2_60565	7	1304660	1304707	2	39	Transcription factors	0	Fungal-trans	0	conserved hypothetical protein	31654	48209	YBR297W	-	-	-	Zn2Cys6 transcriptional regulator	-	-	-	ANID_03502	2534	103180	105713	-	C6 zinc finger domain-containing protein	II	PF00172.11,PF00172.10,PF04082.10,PF04082.11	TRIREDRAFT_60565
jgi|Trire2|60085|e_gw1.7.569.1	60085	e_gw1.7.569.1	1.10068	2.14456	1.93905	2.18775e-06	8.7559e-06	up in ∆ypr2		60085	TRIRE2_60085	7	1293984	1296524	2	41	CAZymes	0	Glycoside hydrolase	Glycoside hydrolase family31	candidate a-glycosidase distantly related to a-glucosidase	77454	48285	YBR229C	\N	Glycoside Hydrolase Family 31	candidate a-glucosidase	GH31 ?-glucosidase	-	-	-	ANID_03504	2603	108970	111572	+	glycosyl hydrolase family 31 protein	II	PF01055.19,PF01055.18	TRIREDRAFT_60085
jgi|Trire2|106661|fgenesh5_pg.C_scaffold_7000462	106661	fgenesh5_pg.C_scaffold_7000462	6.21393	74.2298	-1.512	3.09838e-05	0.000102769	up in ∆ypr2	8	106661	TRIRE2_106661	7	1270768	1271478	2	49	-	-	-	-	-	-	-	-	-	-	-	aspartyl protease	-	-	-	-	-	-	-	-	-	-	-	TRIREDRAFT_106661
jgi|Trire2|106657|fgenesh5_pg.C_scaffold_7000458	106657	fgenesh5_pg.C_scaffold_7000458	1.08421	2.12021	4.40503	5.20489e-16	4.97053e-15	up in ∆ypr2	8	106657	TRIRE2_106657	7	1253276	1253287	2	53	Transcription factors	0	Zn2Cys6	0	conserved hypothetical protein	84050	48270	YDR034C	-	-	-	Zn2Cys6 transcriptional regulator	-	-	-	-	-	-	-	-	-	-	-	TRIREDRAFT_106657
jgi|Trire2|77288|estExt_GeneWisePlus.C_70702	77288	estExt_GeneWisePlus.C_70702	2.06448	4.18284	4.16322	8.62787e-16	8.15219e-15	up in ∆ypr2	8	77288	TRIRE2_77288	7	1251911	1252157	2	54	-	-	-	-	-	-	-	-	-	-	-	Thioredoxin reductase	-	-	-	ANID_08218	1344	17830	19173	+	sulphydryl oxidase Sox patent-A1-Aspergillus niger	II	PF07992.6,PF07992.7	TRIREDRAFT_77288
jgi|Trire2|121478|estExt_fgenesh5_pg.C_70449	121478	estExt_fgenesh5_pg.C_70449	1.31865	2.49432	0.76864	8.59152e-05	0.00026683	up in ∆ypr2	8	121478	TRIRE2_121478	7	1250236	1251057	2	55	-	-	-	-	-	-	-	-	-	-	-	short chain dehydrognease/reductase	-	-	-	-	-	-	-	-	-	-	-	TRIREDRAFT_121478
jgi|Trire2|106654|fgenesh5_pg.C_scaffold_7000455	106654	fgenesh5_pg.C_scaffold_7000455	1.79312	3.46564	1.66193	4.24894e-11	2.87851e-10	up in ∆ypr2	8	106654	TRIRE2_106654	7	1246765	1246813	2	56	Transcription factors	0	Fungal-trans	0	hypothetical protein	229754	203212	YJL206C	\N	fungal specific transcription factor domain-containing protein	This domain is found in a number of fungal transcription factors including transcriptional activator xlnR, yeast regulatory protein GAL4, and other transcription proteins regulating a variety of cellular and metabolic processes.	Zn2Cys6 transcriptional regulator	-	-	-	-	-	-	-	-	-	-	-	TRIREDRAFT_106654
jgi|Trire2|106649|fgenesh5_pg.C_scaffold_7000450	106649	fgenesh5_pg.C_scaffold_7000450	3.57925	11.9526	-0.191112	8.32696e-10	4.9403e-09	up in ∆ypr2	8	106649	TRIRE2_106649	7	1226938	1228049	2	60	-	-	-	-	-	-	-	-	-	-	-	3-hydroxyacyl-CoA dehydrogenase, NAD binding domain, putative	-	-	-	ANID_10471	1977	93693	95669	-	3-hydroxyacyl-CoA dehydrogenase	II	PF00725.14,PF02737.11,PF02737.10,PF00725.15	TRIREDRAFT_106649
jgi|Trire2|121474|estExt_fgenesh5_pg.C_70443	121474	estExt_fgenesh5_pg.C_70443	1.52254	2.87296	6.2145	7.58009e-56	3.36729e-54	up in ∆ypr2	8	121474	TRIRE2_121474	7	1223657	1223803	2	61	Transcription factors	0	Zn2Cys6	0	predicted protein	83987	0	YLR256W	\N	N-terminal fungal transcription regulatory domain-containing protein	The N-terminal region of a number of fungal transcriptional regulatory proteins contains a Cys-rich motif that is involved in zinc-dependent binding of DNA. The region forms a binuclear Zn cluster, in which two Zn atoms are bound by six Cys residues	Zn2Cys6 transcriptional regulator	-	-	-	-	-	-	-	-	-	-	-	TRIREDRAFT_121474
jgi|Trire2|106647|fgenesh5_pg.C_scaffold_7000448	106647	fgenesh5_pg.C_scaffold_7000448	1.01918	2.02677	3.29584	0.000322633	0.000907334	up in ∆ypr2	8	106647	TRIRE2_106647	7	1221153	1221809	2	62	-	-	-	-	-	-	-	-	-	-	-	orphan protein	-	-	-	-	-	-	-	-	-	-	-	TRIREDRAFT_106647
jgi|Trire2|60352|e_gw1.7.288.1	60352	e_gw1.7.288.1	4.52123	22.9628	3.03725	3.42106e-73	2.38646e-71	up in ∆ypr2	8	60352	TRIRE2_60352	7	1208667	1209887	2	65	-	-	-	-	-	-	-	-	-	-	-	NADH-dehydrogenase (ubiquinone)	-	-	-	-	-	-	-	-	-	-	-	TRIREDRAFT_60352
jgi|Trire2|3605|fgenesh1_pm.C_scaffold_7000183	3605	fgenesh1_pm.C_scaffold_7000183	1.35989	2.56666	3.1818	5.57737e-14	4.70703e-13	up in ∆ypr2	8	3605	TRIRE2_3605	7	1205358	1205669	2	66	Transcription factors	0	Zn2Cys6	0	fungal specific transcription factor domain-containing protein	182375	124610	YOR162C	-	-	-	Zn2Cys6 transcriptional regulator	-	-	-	-	-	-	-	-	-	-	-	TRIREDRAFT_3605
jgi|Trire2|106642|fgenesh5_pg.C_scaffold_7000443	106642	fgenesh5_pg.C_scaffold_7000443	1.18168	2.2684	2.15379	2.63934e-06	1.03544e-05	up in ∆ypr2	8	106642	TRIRE2_106642	7	1204634	1205227	2	67	-	-	-	-	-	-	-	-	-	-	-	unknown protein	-	-	-	-	-	-	-	-	-	-	-	TRIREDRAFT_106642
jgi|Trire2|29346|gw1.7.260.1	29346	gw1.7.260.1	2.1352	4.39299	3.08474	7.19982e-28	1.24829e-26	up in ∆ypr2		29346	TRIRE2_29346	7	1106224	1106454	2	103	Mevalonate metabolism	lpp1/dpp1	Phosphatidate phosphatase, EC 3.1.3.4	0	polyprenyl phosphate phosphatase	278433	128286	YDR284C	\N	hypothetical protein	belongs to the phosphatidate-phosphatase related phosphoesterase family	phosphatidate-phosphatase	NCU09692	0	0	-	-	-	-	-	-	-	-	TRIREDRAFT_29346
jgi|Trire2|106591|fgenesh5_pg.C_scaffold_7000392	106591	fgenesh5_pg.C_scaffold_7000392	3.22421	9.3451	4.66865	2.49559e-108	3.537e-106	up in ∆ypr2		106591	TRIRE2_106591	7	1088622	1088772	2	108	-	-	-	-	-	-	-	-	-	-	-	orphan protein	-	-	-	-	-	-	-	-	-	-	-	TRIREDRAFT_106591
jgi|Trire2|60490|e_gw1.7.360.1	60490	e_gw1.7.360.1	1.4175	2.67122	3.73239	1.06547e-18	1.17597e-17	up in ∆ypr2		60490	TRIRE2_60490	7	1082826	1083803	2	111	-	-	-	-	-	-	-	-	-	-	-	2-nitropropane dioxygenase	NCU01275	0	0	ANID_03855	1041	82202	83242	-	oxidoreductase	II	PF03060.8,PF03060.7,PF00478.18	TRIREDRAFT_60490
jgi|Trire2|59843|e_gw1.7.590.1	59843	e_gw1.7.590.1	3.83441	14.2651	0.314716	8.10925e-13	6.27448e-12	up in ∆ypr2		59843	TRIRE2_59843	7	1040347	1040505	2	120	-	-	-	-	-	-	-	-	-	-	-	AMP-dependent synthetase and ligase, acetoacetyl-CoA synthase-like	NCU01378	0	0	ANID_01482	2327	241099	243425	+	acetoacetyl-CoA synthase	VII	TIGR01217,PF00501.21,PF00501.20	TRIREDRAFT_59843
jgi|Trire2|106575|fgenesh5_pg.C_scaffold_7000376	106575	fgenesh5_pg.C_scaffold_7000376	1.45584	2.74315	4.0202	1.50376e-19	1.73926e-18	up in ∆ypr2		106575	TRIRE2_106575	7	1035839	1036343	2	122	CAZymes	0	Glycoside hydrolase	Glycoside hydrolase family79	candidate b-glucuronidase	146878	77255	0	\N	Glycoside Hydrolase Family 79	related to b-glycosidases	GH79 ?-glucuronidase	NCU00937	0	0	-	-	-	-	-	-	-	-	TRIREDRAFT_106575
jgi|Trire2|60370|e_gw1.7.300.1	60370	e_gw1.7.300.1	5.08342	33.905	2.82622	3.32094e-56	1.49761e-54	up in ∆ypr2	9	60370	TRIRE2_60370	7	1005454	1006524	2	135	-	-	-	-	-	-	-	-	-	-	-	unknown protein	-	-	-	ANID_04104	1262	52795	54056	-	conserved hypothetical protein	II	0	TRIREDRAFT_60370
jgi|Trire2|59887|e_gw1.7.274.1	59887	e_gw1.7.274.1	2.34119	5.0672	2.39975	1.69946e-24	2.52908e-23	up in ∆ypr2	9	59887	TRIRE2_59887	7	1003284	1003402	2	136	-	-	-	-	-	-	-	-	-	-	-	L-lactate dehydrogenase, putative	NCU04539	0	0	ANID_04421	1380	147298	148677	+	L-lactate dehydrogenase	III	PF01070.10,PF01070.11	TRIREDRAFT_59887
jgi|Trire2|60445|e_gw1.7.775.1	60445	e_gw1.7.775.1	3.07368	8.41916	3.80207	1.68718e-62	8.91408e-61	up in ∆ypr2	9	60445	TRIRE2_60445	7	997225	998229	2	138	-	-	-	-	-	-	-	-	-	-	-	unknown protein	-	-	-	-	-	-	-	-	-	-	-	TRIREDRAFT_60445
jgi|Trire2|106554|fgenesh5_pg.C_scaffold_7000355	106554	fgenesh5_pg.C_scaffold_7000355	4.88783	29.6062	1.24825	1.45662e-29	2.74392e-28	up in ∆ypr2	9	106554	TRIRE2_106554	7	996264	996500	2	139	-	-	-	-	-	-	-	-	-	-	-	SSCRP	-	-	-	-	-	-	-	-	-	-	-	TRIREDRAFT_106554
jgi|Trire2|60422|e_gw1.7.813.1	60422	e_gw1.7.813.1	1.59813	3.02751	2.32734	2.31138e-12	1.73577e-11	up in ∆ypr2	9	60422	TRIRE2_60422	7	994697	995536	2	140	-	-	-	-	-	-	-	-	-	-	-	unknown protein	-	-	-	ANID_06151	825	72930	73754	+	conserved hypothetical protein	I	0	TRIREDRAFT_60422
jgi|Trire2|3568|fgenesh1_pm.C_scaffold_7000146	3568	fgenesh1_pm.C_scaffold_7000146	2.43751	5.41707	3.34533	3.08177e-38	8.31334e-37	up in ∆ypr2	9	3568	TRIRE2_3568	7	990723	992130	2	141	CAZymes	0	Carbohydrate esterase	Carbohydrate esterase family1	0	30423	47993	0	-	-	-	CE1 esterase	NCU09548	0	0	-	-	-	-	-	-	-	-	TRIREDRAFT_3568
jgi|Trire2|121439|estExt_fgenesh5_pg.C_70330	121439	estExt_fgenesh5_pg.C_70330	1.79241	3.46393	3.94411	4.28151e-29	7.83394e-28	up in ∆ypr2		121439	TRIRE2_121439	7	941913	942707	2	153	-	-	-	-	-	-	-	-	-	-	-	unknown protein	-	-	-	-	-	-	-	-	-	-	-	TRIREDRAFT_121439
jgi|Trire2|106516|fgenesh5_pg.C_scaffold_7000317	106516	fgenesh5_pg.C_scaffold_7000317	3.47729	11.137	0.000218369	7.78948e-11	5.1316e-10	up in ∆ypr2		106516	TRIRE2_106516	7	882960	883771	2	169	-	-	-	-	-	-	-	-	-	-	-	short chain dehydrognease/reductase	NCU01861	0	0	ANID_06274	944	113548	114491	-	short chain dehydrogenase/reductase	I	PF00106.17,PF00106.18,PF01370.14,PF08659.3	TRIREDRAFT_106516
jgi|Trire2|77202|estExt_GeneWisePlus.C_70510	77202	estExt_GeneWisePlus.C_70510	2.35452	5.11426	3.92369	7.63795e-50	2.9145e-48	up in ∆ypr2		77202	TRIRE2_77202	7	880777	881113	2	170	-	-	-	-	-	-	-	-	-	-	-	short chain dehydrogenase/reductase	-	-	-	ANID_09002	1214	71144	72357	+	oxidoreductase	VII	PF00106.17,PF00106.18,PF08659.3	TRIREDRAFT_77202
jgi|Trire2|22110|estExt_fgenesh1_pm.C_70120	22110	estExt_fgenesh1_pm.C_70120	2.16803	4.49408	2.39273	4.38412e-06	1.66933e-05	up in ∆ypr2		22110	TRIRE2_22110	7	841177	841231	2	183	-	-	-	-	-	-	-	-	-	-	-	Flavin-containing monooxygenase	NCU09456	0	0	ANID_03043	1568	677933	679500	+	dimethylaniline monooxygenase	VI	PF00743.12,PF07992.7	TRIREDRAFT_22110
jgi|Trire2|73248|kg2.C_scaffold_7000057	73248	kg2.C_scaffold_7000057	1.0446	2.0628	2.90765	8.41612e-09	4.50255e-08	up in ∆ypr2	10	73248	TRIRE2_73248	7	809421	809630	2	198	CAZymes	0	Glycoside hydrolase	Glycoside hydrolase family55	candidate b-1,3-exoglucanase	229344	77195	0	\N	Glycoside Hydrolase Family 55	candidate exo-1,3-b-glucanase	GH55 exo-1,3-?-glucanase	-	-	-	-	-	-	-	-	-	-	-	TRIREDRAFT_73248
jgi|Trire2|106482|fgenesh5_pg.C_scaffold_7000283	106482	fgenesh5_pg.C_scaffold_7000283	5.58617	48.0403	-1.92592	0.00135332	0.00338767	up in ∆ypr2	10	106482	TRIRE2_106482	7	808427	808575	2	199	-	-	-	-	-	-	-	-	-	-	-	orphan protein	-	-	-	-	-	-	-	-	-	-	-	TRIREDRAFT_106482
jgi|Trire2|121416|estExt_fgenesh5_pg.C_70277	121416	estExt_fgenesh5_pg.C_70277	1.91521	3.7717	8.17559	1.10055e-11	7.86145e-11	up in ∆ypr2	10	121416	TRIRE2_121416	7	806024	806147	2	200	-	-	-	-	-	-	-	-	-	-	-	unknown protein	NCU07136	0	0	ANID_02488	1390	61404	62793	+	conserved hypothetical protein	VII	PF10700.1,PF01284.16	TRIREDRAFT_121416
jgi|Trire2|60489|e_gw1.7.459.1	60489	e_gw1.7.459.1	1.89922	3.73012	3.94208	2.53858e-30	4.93834e-29	up in ∆ypr2	10	60489	TRIRE2_60489	7	798601	798893	2	203	CAZymes	0	Carbohydrate esterase	Carbohydrate esterase family5	0	302304	111005	0	\N	Carbohydrate Esterase Family 5	candidate cutinase/esterase	CE5 cutinase	-	-	-	ANID_10346	836	52369	53204	+	cutinase	VI	PF01083.15,PF02230.9,PF01083.14	TRIREDRAFT_60489
jgi|Trire2|59940|e_gw1.7.436.1	59940	e_gw1.7.436.1	1.43606	2.70581	4.48466	7.1947e-27	1.18966e-25	up in ∆ypr2		59940	TRIRE2_59940	7	785708	785788	2	209	-	-	-	-	-	-	-	-	-	-	-	unknown protein	NCU06603	0	0	ANID_06796	879	337799	338677	-	ThiJ/PfpI family protein	I	PF01965.17,PF01965.16	TRIREDRAFT_59940
jgi|Trire2|121405|estExt_fgenesh5_pg.C_70245	121405	estExt_fgenesh5_pg.C_70245	3.41842	10.6917	4.99202	5.36229e-111	8.25516e-109	up in ∆ypr2		121405	TRIRE2_121405	7	713661	713707	2	228	-	-	-	-	-	-	-	-	\N	Aminotransferase class-III	pfam00202, Aminotran_3, Aminotransferase class-III	4-aminobutyrate aminotransferase	-	-	-	-	-	-	-	-	-	-	-	TRIREDRAFT_121405
jgi|Trire2|121396|estExt_fgenesh5_pg.C_70229	121396	estExt_fgenesh5_pg.C_70229	1.37847	2.59992	6.26198	6.39753e-44	2.06969e-42	up in ∆ypr2		121396	TRIRE2_121396	7	653928	654254	2	243	-	-	-	-	-	-	-	-	-	-	-	orphan protein	-	-	-	-	-	-	-	-	-	-	-	TRIREDRAFT_121396
jgi|Trire2|77093|estExt_GeneWisePlus.C_70315	77093	estExt_GeneWisePlus.C_70315	1.33359	2.52028	4.0648	2.30215e-12	1.7303e-11	up in ∆ypr2		77093	TRIRE2_77093	7	516563	517734	2	275	-	-	-	-	-	-	-	-	-	-	-	acid sphingomyelin phosphodiesterase (probably vacuolar)	NCU06697	0	0	-	-	-	-	-	-	-	-	TRIREDRAFT_77093
jgi|Trire2|60123|e_gw1.7.269.1	60123	e_gw1.7.269.1	1.25693	2.38987	4.74479	2.45236e-23	3.44294e-22	up in ∆ypr2		60123	TRIRE2_60123	7	476141	477325	2	287	-	-	-	-	-	-	-	-	-	-	-	unknown protein	NCU09541	0	0	ANID_08181	1616	161421	163036	+	conserved hypothetical protein	II	0	TRIREDRAFT_60123
jgi|Trire2|106371|fgenesh5_pg.C_scaffold_7000172	106371	fgenesh5_pg.C_scaffold_7000172	3.51095	11.3999	-1.6723	0.000821828	0.00213565	up in ∆ypr2		106371	TRIRE2_106371	7	474532	474712	2	288	-	-	-	-	-	-	-	-	-	-	-	SSCRP	-	-	-	ANID_07322	993	111961	112953	-	conserved hypothetical protein	IV	0	TRIREDRAFT_106371
jgi|Trire2|106353|fgenesh5_pg.C_scaffold_7000154	106353	fgenesh5_pg.C_scaffold_7000154	1.61383	3.06064	2.94048	5.80169e-05	0.000185542	up in ∆ypr2		106353	TRIRE2_106353	7	437967	439160	2	301	-	-	-	-	-	-	-	-	-	-	-	unknown protein	-	-	-	-	-	-	-	-	-	-	-	TRIREDRAFT_106353
jgi|Trire2|60425|e_gw1.7.571.1	60425	e_gw1.7.571.1	1.13948	2.20302	4.90653	1.99802e-23	2.81392e-22	up in ∆ypr2		60425	TRIRE2_60425	7	411375	413858	2	309	-	-	-	-	-	-	-	-	-	-	-	Mechanosensitive ion channel family protein	NCU04207	0	0	ANID_07571	2891	486084	488974	+	mechanosensitive ion channel family	IV	PF00924.10,PF00036.24,PF00924.11	TRIREDRAFT_60425
jgi|Trire2|106294|fgenesh5_pg.C_scaffold_7000095	106294	fgenesh5_pg.C_scaffold_7000095	1.4859	2.80093	3.81945	3.50048e-22	4.67901e-21	up in ∆ypr2		106294	TRIRE2_106294	7	271843	272030	2	349	-	-	-	-	-	-	-	-	-	-	-	unknown protein, only in Magnaporthe, Neurospora and Chaetomium	-	-	-	-	-	-	-	-	-	-	-	TRIREDRAFT_106294
jgi|Trire2|106272|fgenesh5_pg.C_scaffold_7000073	106272	fgenesh5_pg.C_scaffold_7000073	1.00181	2.00251	5.57069	7.56624e-22	9.96445e-21	up in ∆ypr2		106272	TRIRE2_106272	7	215526	215729	2	369	Secondary metabolism	pks9g	Polyketide synthase	Reducing clade I	Polyketide synthase	0	35498	YER061C	\N	polyketide synthase	candidate polyketide synthase	PKS9	-	-	-	-	-	-	-	-	-	-	-	TRIREDRAFT_106272
jgi|Trire2|106259|fgenesh5_pg.C_scaffold_7000060	106259	fgenesh5_pg.C_scaffold_7000060	5.54235	46.603	4.45523	5.68217e-150	1.95139e-147	up in ∆ypr2		106259	TRIRE2_106259	7	178984	179002	2	381	Transcription factors	0	Zn2Cys6	0	Cutinase transcription factor 1 beta	0	229239	YLR098C	\N	cutinase transcription factor 1 beta	Contains a N-terminal binuclear Zn cluster and a DNA binding domain; PMID: 11756444	Zn2Cys6 transcriptional regulator	-	-	-	-	-	-	-	-	-	-	-	TRIREDRAFT_106259
jgi|Trire2|106258|fgenesh5_pg.C_scaffold_7000059	106258	fgenesh5_pg.C_scaffold_7000059	4.29827	19.6746	1.14669	4.87667e-24	7.115e-23	up in ∆ypr2		106258	TRIRE2_106258	7	177429	177441	2	382	-	-	-	-	-	-	-	-	-	-	-	unknown protein	-	-	-	-	-	-	-	-	-	-	-	TRIREDRAFT_106258
jgi|Trire2|3447|fgenesh1_pm.C_scaffold_7000025	3447	fgenesh1_pm.C_scaffold_7000025	5.39418	42.0543	3.92565	1.97631e-93	2.15201e-91	up in ∆ypr2		3447	TRIRE2_3447	7	112599	112739	2	396	-	-	-	-	-	-	-	-	-	-	-	NADP-dependent alcohol dehydrogenase (class V)	-	-	-	ANID_08628	1090	143566	144655	-	NADP-dependent alcohol dehydrogenase	III	PF00107.18,PF00107.19,PF08240.5,PF08240.4	TRIREDRAFT_3447
jgi|Trire2|106236|fgenesh5_pg.C_scaffold_7000037	106236	fgenesh5_pg.C_scaffold_7000037	1.00629	2.00874	1.4475	0.00051215	0.00138786	up in ∆ypr2		106236	TRIRE2_106236	7	92787	92815	2	403	-	-	-	-	-	-	-	-	-	-	-	orphan protein	-	-	-	-	-	-	-	-	-	-	-	TRIREDRAFT_106236
jgi|Trire2|121298|estExt_fgenesh5_pg.C_70028	121298	estExt_fgenesh5_pg.C_70028	2.34889	5.09431	8.62309	9.31101e-70	6.06847e-68	up in ∆ypr2		121298	TRIRE2_121298	7	68233	68594	2	409	-	-	-	-	-	-	-	-	fdh1	formate dehydrogenase	\N	formate dehydrogenase	NCU03813	fdh	0	ANID_06525	1831	105856	107686	-	NAD-dependent formate dehydrogenase AciA/Fdh	I	PF00389.22,PF02826.12,PF00389.23,PF02826.11,PF03446.8	TRIREDRAFT_121298
jgi|Trire2|106223|fgenesh5_pg.C_scaffold_7000024	106223	fgenesh5_pg.C_scaffold_7000024	1.79195	3.46284	6.22839	6.90921e-57	3.18002e-55	up in ∆ypr2		106223	TRIRE2_106223	7	62014	62536	2	412	-	-	-	-	-	-	-	-	-	-	-	orphan protein	NCU03773	0	0	-	-	-	-	-	-	-	-	TRIREDRAFT_106223
jgi|Trire2|63397|e_gw1.12.476.1	63397	e_gw1.12.476.1	1.09782	2.14031	4.446	3.46364e-17	3.55481e-16	up in ∆ypr2		63397	TRIRE2_63397	12	909070	909178	2	463	-	-	-	-	-	-	-	-	-	-	-	unknown protein	NCU03949	npd-1	ncd-2	-	-	-	-	-	-	-	-	TRIREDRAFT_63397
jgi|Trire2|49366|estExt_Genewise1.C_120495	49366	estExt_Genewise1.C_120495	2.16854	4.49567	5.32247	9.28319e-73	6.42555e-71	up in ∆ypr2		49366	TRIRE2_49366	12	854280	855012	2	474	-	-	-	-	-	-	-	-	-	-	-	unknown protein	NCU04667	0	0	ANID_05324	1764	182781	184544	-	conserved hypothetical protein	V	0	TRIREDRAFT_49366
jgi|Trire2|4454|fgenesh1_pm.C_scaffold_12000132	4454	fgenesh1_pm.C_scaffold_12000132	1.30303	2.46746	2.20323	1.98729e-09	1.13529e-08	up in ∆ypr2		4454	TRIRE2_4454	12	852047	852319	2	475	-	-	-	-	-	-	-	-	-	-	-	unknown protein, secreted	NCU11309	0	0	ANID_10581	1155	168224	169378	+	integral membrane protein	III	PF10700.1,PF01284.16	TRIREDRAFT_4454
jgi|Trire2|26642|gw1.12.68.1	26642	gw1.12.68.1	1.39623	2.63212	3.9631	4.18588e-20	4.97017e-19	up in ∆ypr2		26642	TRIRE2_26642	12	721137	721229	2	513	-	-	-	-	-	-	-	-	-	-	-	MFS permease	-	-	-	-	-	-	-	-	-	-	-	TRIREDRAFT_26642
jgi|Trire2|108577|fgenesh5_pg.C_scaffold_12000196	108577	fgenesh5_pg.C_scaffold_12000196	1.83659	3.57164	-0.295999	0.000193618	0.000563316	up in ∆ypr2		108577	TRIRE2_108577	12	717734	719350	2	514	-	-	-	-	-	-	-	-	-	-	-	unknown protein	NCU07083	0	0	-	-	-	-	-	-	-	-	TRIREDRAFT_108577
jgi|Trire2|49308|estExt_Genewise1.C_120390	49308	estExt_Genewise1.C_120390	1.6158	3.06481	8.85595	8.372e-39	2.30011e-37	up in ∆ypr2		49308	TRIRE2_49308	12	705926	706006	2	520	-	-	-	-	-	-	-	-	-	-	-	unknown protein	NCU01424	0	0	ANID_07594	669	583853	584521	-	DUF636 domain-containing protein	IV	PF04828.7,PF04828.6	TRIREDRAFT_49308
jgi|Trire2|108540|fgenesh5_pg.C_scaffold_12000159	108540	fgenesh5_pg.C_scaffold_12000159	1.96531	3.90497	-0.45736	0.000244774	0.000702536	up in ∆ypr2		108540	TRIRE2_108540	12	579142	579873	2	553	-	-	-	-	-	-	-	-	-	-	-	unknown protein	-	-	-	-	-	-	-	-	-	-	-	TRIREDRAFT_108540
jgi|Trire2|63909|e_gw1.12.140.1	63909	e_gw1.12.140.1	1.38708	2.61549	-0.129148	0.00328151	0.00759673	up in ∆ypr2		63909	TRIRE2_63909	12	503878	505239	2	576	-	-	-	-	-	-	-	-	-	-	-	unknown protein	-	-	-	-	-	-	-	-	-	-	-	TRIREDRAFT_63909
jgi|Trire2|78984|estExt_GeneWisePlus.C_120225	78984	estExt_GeneWisePlus.C_120225	1.33902	2.5298	7.1068	1.30577e-27	2.22081e-26	up in ∆ypr2		78984	TRIRE2_78984	12	401475	402172	2	601	-	-	-	-	-	-	-	-	-	-	-	unknown protein	NCU09310	0	0	-	-	-	-	-	-	-	-	TRIREDRAFT_78984
jgi|Trire2|78970|estExt_GeneWisePlus.C_120183	78970	estExt_GeneWisePlus.C_120183	1.07064	2.10036	8.75513	3.95956e-19	4.4753e-18	up in ∆ypr2		78970	TRIRE2_78970	12	333145	333432	2	618	-	-	-	-	-	-	-	-	-	-	-	mitochondrial (phosphate) carrier	NCU07465	0	0	ANID_02977	1956	505574	507529	+	mitochondrial phosphate carrier protein 2	VI	PF00153.20,PF00153.19	TRIREDRAFT_78970
jgi|Trire2|63914|e_gw1.12.116.1	63914	e_gw1.12.116.1	1.13482	2.1959	5.48311	2.19265e-26	3.56616e-25	up in ∆ypr2		63914	TRIRE2_63914	12	243874	245034	2	647	-	-	-	-	-	-	-	-	-	-	-	integral membrane protein, putative	NCU02690	0	0	ANID_00294	1617	11047	12663	+	integral membrane protein	VIII	PF10329.2,PF10329.1	TRIREDRAFT_63914
jgi|Trire2|49112|estExt_Genewise1.C_120081	49112	estExt_Genewise1.C_120081	2.38413	5.22028	5.60836	9.64004e-77	7.29457e-75	up in ∆ypr2		49112	TRIRE2_49112	12	177426	177637	2	666	-	-	-	-	-	-	-	-	\N	Glutamate-1-semialdehyde aminotransferase	COG0001, HemL, Glutamate-1-semialdehyde aminotransferase	Glutamate-1-semialdehyde aminotransferase	NCU11422	-	-	ANID_10913	1400	25497	26896	-	conserved hypothetical protein	IV	PF00202.13,PF00202.14	TRIREDRAFT_49112
jgi|Trire2|27599|gw1.12.102.1	27599	gw1.12.102.1	1.63501	3.10589	4.70024	6.74597e-35	1.60626e-33	up in ∆ypr2		27599	TRIRE2_27599	12	52910	53301	2	695	-	-	-	-	-	-	-	-	-	-	-	cation efflux family protein	NCU09368	0	0	ANID_05049	1747	609149	610895	-	cation diffusion facilitator	III	TIGR01297,PF01545.13,PF01545.14	TRIREDRAFT_27599
jgi|Trire2|122363|estExt_fgenesh5_pg.C_120012	122363	estExt_fgenesh5_pg.C_120012	2.70153	6.50494	5.13482	2.7211e-77	2.11276e-75	up in ∆ypr2		122363	TRIRE2_122363	12	32570	33295	2	699	heat shock proteins	0	sHSP	0	hypothetical hsp23, related to S. cerevisiae HSP26p and to N. crassa hsp30-like protein	299986	215292	YDR171W	-	-	-	Hsp23	-	-	-	-	-	-	-	-	-	-	-	TRIREDRAFT_122363
jgi|Trire2|82601|estExt_GeneWisePlus.C_430017	82601	estExt_GeneWisePlus.C_430017	1.26592	2.40481	4.86099	1.18072e-27	2.01967e-26	up in ∆ypr2		82601	TRIRE2_82601	43	53405	53533	2	714	-	-	-	-	-	-	-	-	\N	Aldehyde dehydrogenase	pfam00171, Aldedh, Aldehyde dehydrogenase family	AldedhAldehyde dehydrogenase family	NCU03076	0	0	ANID_01733	1868	37477	39344	+	delta-1-pyrroline-5-carboxylate dehydrogenase	VII	PF00171.15,TIGR01236,PF00171.14	TRIREDRAFT_82601
jgi|Trire2|70894|e_gw1.43.13.1	70894	e_gw1.43.13.1	2.07166	4.20371	3.84864	2.39155e-37	6.28064e-36	up in ∆ypr2	11	70894	TRIRE2_70894	43	35271	35657	2	718	-	-	-	-	-	-	-	-	-	-	-	unknown protein	-	-	-	ANID_10977	381	124059	124439	-	conserved hypothetical protein	IV	0	TRIREDRAFT_70894
jgi|Trire2|124259|estExt_fgenesh5_pg.C_430009	124259	estExt_fgenesh5_pg.C_430009	1.83705	3.57279	1.97774	2.10274e-11	1.46912e-10	up in ∆ypr2	11	124259	TRIRE2_124259	43	30381	31226	2	719	-	-	-	-	-	-	-	-	-	-	-	SSCRP	-	-	-	-	-	-	-	-	-	-	-	TRIREDRAFT_124259
jgi|Trire2|112525|fgenesh5_pg.C_scaffold_43000008	112525	fgenesh5_pg.C_scaffold_43000008	1.09741	2.13971	4.77579	1.10354e-19	1.28468e-18	up in ∆ypr2	11	112525	TRIRE2_112525	43	28604	29473	2	720	-	-	-	-	-	-	-	-	-	-	-	unknown protein	-	-	-	-	-	-	-	-	-	-	-	TRIREDRAFT_112525
jgi|Trire2|112523|fgenesh5_pg.C_scaffold_43000006	112523	fgenesh5_pg.C_scaffold_43000006	1.16854	2.24784	1.41158	2.36551e-05	8.00062e-05	up in ∆ypr2	11	112523	TRIRE2_112523	43	23149	24166	2	722	-	-	-	-	-	-	-	-	-	-	-	unknown protein	-	-	-	-	-	-	-	-	-	-	-	TRIREDRAFT_112523
jgi|Trire2|28409|gw1.43.9.1	28409	gw1.43.9.1	1.97064	3.91942	5.26524	7.66674e-46	2.59304e-44	up in ∆ypr2	11	28409	TRIRE2_28409	43	20586	20777	2	723	-	-	-	-	-	-	-	-	-	-	-	MFS permease	-	-	-	-	-	-	-	-	-	-	-	TRIREDRAFT_28409
jgi|Trire2|112521|fgenesh5_pg.C_scaffold_43000004	112521	fgenesh5_pg.C_scaffold_43000004	1.62451	3.08336	1.98265	3.20833e-11	2.19687e-10	up in ∆ypr2	11	112521	TRIRE2_112521	43	17940	18938	2	724	-	-	-	-	-	-	-	-	-	-	-	4,5-dihydroxyphthalate decarboxylase	-	-	-	-	-	-	-	-	-	-	-	TRIREDRAFT_112521
jgi|Trire2|67509|e_gw1.21.295.1	67509	e_gw1.21.295.1	3.09041	8.51739	-0.894371	7.71912e-05	0.000241246	up in ∆ypr2		67509	TRIRE2_67509	21	562400	562605	2	730	-	-	-	-	-	-	-	-	-	-	-	unknown protein	-	-	-	-	-	-	-	-	-	-	-	TRIREDRAFT_67509
jgi|Trire2|27181|gw1.21.59.1	27181	gw1.21.59.1	1.51368	2.85538	3.37275	5.58222e-15	5.06541e-14	up in ∆ypr2		27181	TRIRE2_27181	21	506491	506551	2	746	-	-	-	-	-	-	-	-	-	-	-	MFS permease	NCU04322	0	0	ANID_02531	1982	35827	37808	-	MFS multidrug transporter	VII	PF07690.9,PF07690.8,PF00083.17	TRIREDRAFT_27181
jgi|Trire2|67334|e_gw1.21.18.1	67334	e_gw1.21.18.1	1.61669	3.0667	5.70608	6.1882e-53	2.53461e-51	up in ∆ypr2		67334	TRIRE2_67334	21	495115	495599	2	747	Heterotrimeric G-protein pathway	0	GPCRs	7-TM receptor (15 TM!)	PTH11-like	79664	142807	0	-	-	-	MFS permease	NCU04310	0	0	ANID_04378	2857	30298	33154	-	MFS monosaccharide transporter	III	PF07690.9,PF07690.8	TRIREDRAFT_67334
jgi|Trire2|123431|estExt_fgenesh5_pg.C_210125	123431	estExt_fgenesh5_pg.C_210125	2.11327	4.32672	1.9812	8.37448e-10	4.96519e-09	up in ∆ypr2		123431	TRIRE2_123431	21	475794	476155	2	753	-	-	-	-	-	-	-	-	-	-	-	thymine diounknown proteingenase	-	-	-	-	-	-	-	-	-	-	-	TRIREDRAFT_123431
jgi|Trire2|110653|fgenesh5_pg.C_scaffold_21000119	110653	fgenesh5_pg.C_scaffold_21000119	1.24829	2.3756	4.72997	3.36315e-23	4.70682e-22	up in ∆ypr2		110653	TRIRE2_110653	21	432883	433000	2	763	-	-	-	-	-	-	-	-	-	-	-	unknown protein	-	-	-	-	-	-	-	-	-	-	-	TRIREDRAFT_110653
jgi|Trire2|5275|fgenesh1_pm.C_scaffold_21000058	5275	fgenesh1_pm.C_scaffold_21000058	1.74907	3.36142	2.63145	3.11715e-15	2.88127e-14	up in ∆ypr2		5275	TRIRE2_5275	21	289956	290216	2	793	Chromatin and histone modification	0	HMKT family proteins	lysine methyltransferases (HMKTs) - SET domain	related to Set2	138765	77874	0	-	-	-	unknown protein with SET domain	NCU08475	0	0	ANID_07208	567	954	1520	+	conserved hypothetical protein	IV	PF00856.21	TRIREDRAFT_5275
jgi|Trire2|80920|estExt_GeneWisePlus.C_210182	80920	estExt_GeneWisePlus.C_210182	1.4319	2.69802	8.88938	2.09999e-11	1.46835e-10	up in ∆ypr2		80920	TRIRE2_80920	21	249581	250581	2	804	-	-	-	-	-	-	-	-	\N	alcohol dehydrogenase	candidate adh1	ADH1	NCU01754	adh-1	0	ANID_08979	1353	8820	10172	-	alcohol dehydrogenase I	VII	PF00107.18,PF00107.19,PF08240.5,PF08240.4	TRIREDRAFT_80920
jgi|Trire2|110593|fgenesh5_pg.C_scaffold_21000059	110593	fgenesh5_pg.C_scaffold_21000059	1.1772	2.26138	5.02873	3.47926e-21	4.41911e-20	up in ∆ypr2		110593	TRIRE2_110593	21	193101	193696	2	822	-	-	-	-	-	-	-	-	-	-	-	unknown protein	NCU08476	0	0	ANID_10645	1141	124037	125177	+	conserved hypothetical protein	V	0	TRIREDRAFT_110593
jgi|Trire2|67493|e_gw1.21.325.1	67493	e_gw1.21.325.1	1.54718	2.92245	3.28653	7.12573e-18	7.58351e-17	up in ∆ypr2		67493	TRIRE2_67493	21	141534	141696	2	841	-	-	-	-	-	-	-	-	\N	\N	pfam05875,aPHC, Alkaline phytoceramidase	Alkaline phytoceramidase	-	-	-	ANID_02333	1199	170734	171932	-	conserved hypothetical protein	VII	PF05875.4,PF05875.5	TRIREDRAFT_67493
jgi|Trire2|80871|estExt_GeneWisePlus.C_210087	80871	estExt_GeneWisePlus.C_210087	1.41403	2.66481	5.48618	7.46145e-31	1.50391e-29	up in ∆ypr2		80871	TRIRE2_80871	21	133124	133325	2	843	-	-	-	-	-	-	-	-	-	-	-	unknown protein	-	-	-	ANID_10714	1285	298100	299384	-	conserved hypothetical protein	V	PF09949.1,PF09949.2	TRIREDRAFT_80871
jgi|Trire2|123382|estExt_fgenesh5_pg.C_210021	123382	estExt_fgenesh5_pg.C_210021	1.33561	2.52382	7.5748	2.3282e-08	1.18588e-07	up in ∆ypr2		123382	TRIRE2_123382	21	54935	55919	2	859	-	-	-	-	-	-	-	-	-	-	-	Coproporphyrinogen III oxidase	NCU01546	0	0	ANID_05130	1592	91619	93210	-	coproporphyrinogen III oxidase	V	PF01218.11,PF01218.10	TRIREDRAFT_123382
jgi|Trire2|80833|estExt_GeneWisePlus.C_210026	80833	estExt_GeneWisePlus.C_210026	1.89633	3.72264	6.43114	9.41459e-78	7.43919e-76	up in ∆ypr2		80833	TRIRE2_80833	21	35199	35341	2	867	CAZymes	chi18-5/ech42/ech1/cht42	Glycoside hydrolase	Glycoside hydrolase family18	chitinase, fungal subgroup A chitinase; known as ECH42 in other Trichoderma species	131598	111866	YDR371W	chi18-5	\N	chitinase (EC 3.2.1.14); glycoside hydrolase family 18, extracellular, frequently used for phylogenetic analysis, possibly involved in mycoparasitism	GH18 chitinase Chi18-5	NCU04883	gh18-4	0	-	-	-	-	-	-	-	-	TRIREDRAFT_80833
jgi|Trire2|57940|e_gw1.4.889.1	57940	e_gw1.4.889.1	1.4251	2.68534	6.32607	1.17828e-48	4.31182e-47	up in ∆ypr2		57940	TRIRE2_57940	4	115671	116009	2	924	-	-	-	-	-	-	-	-	-	-	-	alternative oxidase aox1	NCU07953	aod-1	aod-B	ANID_02099	1436	315216	316651	+	alternative oxidase	VII	PF01786.9,PF01786.10	TRIREDRAFT_57940
jgi|Trire2|104695|fgenesh5_pg.C_scaffold_4000073	104695	fgenesh5_pg.C_scaffold_4000073	1.72679	3.30991	-0.615773	0.00164654	0.00406133	up in ∆ypr2		104695	TRIRE2_104695	4	183780	183816	2	941	-	-	-	-	-	-	-	-	-	-	-	orphan protein	-	-	-	-	-	-	-	-	-	-	-	TRIREDRAFT_104695
jgi|Trire2|57322|e_gw1.4.177.1	57322	e_gw1.4.177.1	1.44262	2.71813	5.46733	1.90895e-40	5.64403e-39	up in ∆ypr2		57322	TRIRE2_57322	4	187590	187847	2	943	-	-	-	-	-	-	-	-	\N	aminotransferase	COG1167, ARO8, Transcriptional regulators containing a DNA-binding HTH domain and an aminotransferase domain (MocR family)	ARO Transcriptional regulators containing a DNA-binding HTH domain and an aminotransferase domain (MocR family)	NCU09116	0	0	ANID_06338	1902	321679	323580	+	aromatic aminotransferase Aro8	I	PF00155.14	TRIREDRAFT_57322
jgi|Trire2|57527|e_gw1.4.915.1	57527	e_gw1.4.915.1	1.18062	2.26675	3.09729	7.69071e-10	4.57803e-09	up in ∆ypr2		57527	TRIRE2_57527	4	230265	230374	2	952	-	-	-	-	-	-	-	-	-	-	-	unknown protein	-	-	-	-	-	-	-	-	-	-	-	TRIREDRAFT_57527
jgi|Trire2|104741|fgenesh5_pg.C_scaffold_4000119	104741	fgenesh5_pg.C_scaffold_4000119	1.33241	2.51824	3.24543	6.04542e-12	4.4029e-11	up in ∆ypr2		104741	TRIRE2_104741	4	357285	358016	2	975	-	-	-	-	-	-	-	-	-	-	-	unknown protein	NCU09807	0	0	-	-	-	-	-	-	-	-	TRIREDRAFT_104741
jgi|Trire2|57643|e_gw1.4.886.1	57643	e_gw1.4.886.1	1.13607	2.19781	0.28124	0.00279451	0.00655258	up in ∆ypr2		57643	TRIRE2_57643	4	661455	661675	2	1043	-	-	-	-	-	-	-	-	-	-	-	unknown protein	-	-	-	-	-	-	-	-	-	-	-	TRIREDRAFT_57643
jgi|Trire2|45971|estExt_Genewise1.C_40386	45971	estExt_Genewise1.C_40386	1.29543	2.45449	6.04955	3.32288e-36	8.4051e-35	up in ∆ypr2		45971	TRIRE2_45971	4	663125	663367	2	1044	-	-	-	-	-	-	-	-	-	-	-	mismatched base pair and cruciform DNA recognition protein	NCU04635	0	0	-	-	-	-	-	-	-	-	TRIREDRAFT_45971
jgi|Trire2|21758|estExt_fgenesh1_pm.C_40114	21758	estExt_fgenesh1_pm.C_40114	2.04153	4.11682	8.604	6.73436e-55	2.93323e-53	up in ∆ypr2		21758	TRIRE2_21758	4	705678	705908	2	1057	-	-	-	-	-	-	-	-	acu3	isocitrate lyase	\N	isocitrate lyase	NCU04230	acu-3	0	ANID_05634	1994	88696	90689	-	isocitrate lyase	V	PF00463.14,PF00463.13,TIGR01346	TRIREDRAFT_21758
jgi|Trire2|46002|estExt_Genewise1.C_40441	46002	estExt_Genewise1.C_40441	2.00665	4.01848	10.367	4.7175e-53	1.94298e-51	up in ∆ypr2		46002	TRIRE2_46002	4	739119	739119	2	1065	-	-	-	-	-	-	-	-	-	-	-	unknown protein, only in fungi	NCU04314	0	0	-	-	-	-	-	-	-	-	TRIREDRAFT_46002
jgi|Trire2|104867|fgenesh5_pg.C_scaffold_4000245	104867	fgenesh5_pg.C_scaffold_4000245	1.28324	2.43386	1.69691	2.80636e-07	1.24853e-06	up in ∆ypr2		104867	TRIRE2_104867	4	755512	755595	2	1070	-	-	-	-	-	-	-	-	-	-	-	orphan protein	-	-	-	-	-	-	-	-	-	-	-	TRIREDRAFT_104867
jgi|Trire2|57749|e_gw1.4.772.1	57749	e_gw1.4.772.1	1.36231	2.57096	3.35093	2.51591e-16	2.44712e-15	up in ∆ypr2		57749	TRIRE2_57749	4	765737	766195	2	1073	-	-	-	-	-	-	-	-	-	-	-	MFS permease	-	-	-	ANID_06774	1423	259531	260953	-	conserved hypothetical protein	I	PF07690.9,PF07690.8,PF00083.17	TRIREDRAFT_57749
jgi|Trire2|75884|estExt_GeneWisePlus.C_40445	75884	estExt_GeneWisePlus.C_40445	1.55131	2.93083	6.15956	2.65075e-54	1.13247e-52	up in ∆ypr2		75884	TRIRE2_75884	4	771298	771320	2	1074	-	-	-	-	-	-	-	-	-	-	-	unknown protein	NCU04219	0	0	-	-	-	-	-	-	-	-	TRIREDRAFT_75884
jgi|Trire2|120696|estExt_fgenesh5_pg.C_40258	120696	estExt_fgenesh5_pg.C_40258	3.17205	9.01324	4.92187	1.09122e-111	1.70938e-109	up in ∆ypr2		120696	TRIRE2_120696	4	807795	808820	2	1085	-	-	-	-	-	-	-	-	-	-	-	alcohol dehydrogenase	-	-	-	ANID_06813	1422	47913	49334	+	alcohol dehydrogenase	I	PF08240.5,PF08240.4	TRIREDRAFT_120696
jgi|Trire2|75937|estExt_GeneWisePlus.C_40542	75937	estExt_GeneWisePlus.C_40542	1.97789	3.93917	3.77713	7.63558e-35	1.81325e-33	up in ∆ypr2		75937	TRIRE2_75937	4	947868	948913	2	1126	-	-	-	-	-	-	-	-	-	-	-	unknown protein	NCU00754	0	0	ANID_08122	1709	323973	325681	+	MFS multidrug transporter	II	PF07690.9,PF06609.6,PF07690.8,PF00083.17,TIGR00880	TRIREDRAFT_75937
jgi|Trire2|120751|estExt_fgenesh5_pg.C_40358	120751	estExt_fgenesh5_pg.C_40358	1.04376	2.06159	6.2899	4.72405e-17	4.79331e-16	up in ∆ypr2		120751	TRIRE2_120751	4	1151203	1151798	2	1173	-	-	-	-	-	-	-	-	-	-	-	unknown protein	NCU00132	0	0	ANID_00898	833	101725	102557	+	conserved hypothetical protein	VIII	0	TRIREDRAFT_120751
jgi|Trire2|57524|e_gw1.4.322.1	57524	e_gw1.4.322.1	1.46543	2.76146	6.29901	2.6196e-49	9.82791e-48	up in ∆ypr2		57524	TRIRE2_57524	4	1245575	1246714	2	1200	-	-	-	-	-	-	-	-	-	-	-	amidohydrolase 2	NCU06417	0	0	ANID_00050	1192	2247	3438	-	uracil-5-carboxylate decarboxylase	VIII	PF04909.6,PF04909.7	TRIREDRAFT_57524
jgi|Trire2|76034|estExt_GeneWisePlus.C_40700	76034	estExt_GeneWisePlus.C_40700	1.8276	3.54947	5.16087	2.2114e-51	8.73698e-50	up in ∆ypr2		76034	TRIRE2_76034	4	1247436	1247480	2	1201	-	-	-	-	-	-	-	-	-	-	-	Iron/ascorbate family oxidoreductases	NCU06416	0	0	ANID_00051	1217	3820	5036	+	oxidoreductase	VIII	PF03171.12,PF03171.13	TRIREDRAFT_76034
jgi|Trire2|105106|fgenesh5_pg.C_scaffold_4000484	105106	fgenesh5_pg.C_scaffold_4000484	1.88848	3.70244	3.52432	1.23035e-18	1.3546e-17	up in ∆ypr2		105106	TRIRE2_105106	4	1483641	1484234	2	1269	-	-	-	-	-	-	-	-	-	-	-	orphan protein	-	-	-	-	-	-	-	-	-	-	-	TRIREDRAFT_105106
jgi|Trire2|76117|estExt_GeneWisePlus.C_40860	76117	estExt_GeneWisePlus.C_40860	1.20825	2.31057	5.85467	3.41255e-29	6.29558e-28	up in ∆ypr2		76117	TRIRE2_76117	4	1540339	1540999	2	1282	-	-	-	-	-	-	-	-	-	-	-	unknown protein	NCU07959	0	0	ANID_08063	1422	139103	140524	-	conserved hypothetical protein	II	PF00328.15,PF00328.14	TRIREDRAFT_76117
jgi|Trire2|57914|e_gw1.4.318.1	57914	e_gw1.4.318.1	2.14954	4.43685	1.43537	5.67545e-13	4.457e-12	up in ∆ypr2		57914	TRIRE2_57914	4	1621844	1623028	2	1306	CAZymes	0	Carbohydrate esterase	Carbohydrate esterase family10	0	-	-	YNL320W	-	-	-	CE10 esterase/lipase/thioesterase	-	-	-	-	-	-	-	-	-	-	-	TRIREDRAFT_57914
jgi|Trire2|46285|estExt_Genewise1.C_40949	46285	estExt_Genewise1.C_40949	4.70409	26.0658	8.18019	2.60641e-40	7.63036e-39	up in ∆ypr2		46285	TRIRE2_46285	4	1629360	1629923	2	1308	heat shock proteins	0	sHSP	0	hypothetical hsp23, related to S. cerevisiae HSP42p and to N. crassa hsp30-like protein	301737	217094	YDR171W	-	-	-	Hsp26/Hsp42	-	-	-	ANID_07892	994	78951	79944	-	hsp30-like protein	II	PF00011.13,PF00011.14	TRIREDRAFT_46285
jgi|Trire2|105155|fgenesh5_pg.C_scaffold_4000533	105155	fgenesh5_pg.C_scaffold_4000533	1.69362	3.23466	0.0874099	0.000189769	0.000553198	up in ∆ypr2		105155	TRIRE2_105155	4	1641981	1646231	2	1311	-	-	-	-	-	-	-	-	-	-	-	unknown protein	-	-	-	-	-	-	-	-	-	-	-	TRIREDRAFT_105155
jgi|Trire2|57555|e_gw1.4.762.1	57555	e_gw1.4.762.1	2.21878	4.65499	1.31618	1.78652e-13	1.45149e-12	up in ∆ypr2		57555	TRIRE2_57555	4	1718721	1718971	2	1331	Secondary metabolism	0	Cytochrome P450	p450 superfamily (cI12078)	0	0	0	0	-	-	-	cytochrome P450 monooxygenase	-	-	-	ANID_07359	1608	87110	88717	-	cytochrome P450 oxidoreductase	IV	PF00067.14,PF00067.15	TRIREDRAFT_57555
jgi|Trire2|58472|e_gw1.5.692.1	58472	e_gw1.5.692.1	5.15814	35.707	5.47469	8.89278e-173	7.21851e-170	up in ∆ypr2	12	58472	TRIRE2_58472	5	1591039	1591241	2	1389	Antioxidant system	cat-3	0	0	Catalase	88135	166093	YDR256C	\N	catalase	\N	Catalase	-	-	-	-	-	-	-	-	-	-	-	TRIREDRAFT_58472
jgi|Trire2|76601|estExt_GeneWisePlus.C_50808	76601	estExt_GeneWisePlus.C_50808	5.10208	34.3462	6.87336	7.32483e-180	7.26705e-177	up in ∆ypr2	12	76601	TRIRE2_76601	5	1588514	1589993	2	1390	Sulfur metabolism	0	sulfur assimilation	EC number 1.8.3.1	sulfite oxidase	0	215055	0	\N	sulfite oxidase	\N	Sulfite oxidase, molybdopterin-binding component	-	-	-	-	-	-	-	-	-	-	-	TRIREDRAFT_76601
jgi|Trire2|105722|fgenesh5_pg.C_scaffold_5000507	105722	fgenesh5_pg.C_scaffold_5000507	4.22581	18.7109	2.12673	6.38556e-30	1.21312e-28	up in ∆ypr2	12	105722	TRIRE2_105722	5	1587761	1587763	2	1391	-	-	-	-	-	-	-	-	-	-	-	orphan protein	-	-	-	-	-	-	-	-	-	-	-	TRIREDRAFT_105722
jgi|Trire2|121082|estExt_fgenesh5_pg.C_50483	121082	estExt_fgenesh5_pg.C_50483	2.2292	4.68875	6.96125	1.92276e-55	8.41585e-54	up in ∆ypr2		121082	TRIRE2_121082	5	1502131	1502717	2	1409	-	-	-	-	-	-	-	-	-	-	-	orphan protein	-	-	-	-	-	-	-	-	-	-	-	TRIREDRAFT_121082
jgi|Trire2|76571|estExt_GeneWisePlus.C_50747	76571	estExt_GeneWisePlus.C_50747	1.60878	3.04994	5.76299	5.55636e-49	2.05862e-47	up in ∆ypr2		76571	TRIRE2_76571	5	1467419	1467469	2	1422	-	-	-	-	-	-	-	-	-	-	-	unknown protein	NCU07453	0	0	ANID_03943	1051	128177	129227	-	pyroglutamyl peptidase type I	II	PF01470.10	TRIREDRAFT_76571
jgi|Trire2|58774|e_gw1.5.645.1	58774	e_gw1.5.645.1	1.62536	3.0852	3.0462	7.90286e-05	0.000246643	up in ∆ypr2		58774	TRIRE2_58774	5	1401282	1401814	2	1438	-	-	-	-	-	-	-	-	-	-	-	unknown protein	NCU07508	0	0	ANID_03750	1775	633223	634997	-	conserved hypothetical protein	II	0	TRIREDRAFT_58774
jgi|Trire2|21908|estExt_fgenesh1_pm.C_50108	21908	estExt_fgenesh1_pm.C_50108	1.40882	2.65519	6.85177	4.02786e-35	9.74655e-34	up in ∆ypr2		21908	TRIRE2_21908	5	1015898	1016536	2	1535	-	-	-	-	-	-	-	-	-	-	-	fatty acid elongase, 5 TM, GNS1/SUR4 membrane protein	NCU08976	0	0	ANID_00981	1658	342050	343707	-	fatty acid elongase	VIII	PF01151.11,PF01151.10	TRIREDRAFT_21908
jgi|Trire2|120993|estExt_fgenesh5_pg.C_50315	120993	estExt_fgenesh5_pg.C_50315	4.31109	19.8503	8.12992	2.8221e-102	3.65196e-100	up in ∆ypr2	13	120993	TRIRE2_120993	5	987131	987183	2	1544	-	-	-	-	-	-	-	-	-	-	-	unknown protein	-	-	-	-	-	-	-	-	-	-	-	TRIREDRAFT_120993
jgi|Trire2|105533|fgenesh5_pg.C_scaffold_5000318	105533	fgenesh5_pg.C_scaffold_5000318	4.84162	28.6729	10.1179	2.22454e-103	2.92102e-101	up in ∆ypr2	13	105533	TRIRE2_105533	5	986705	986866	2	1545	-	-	-	-	-	-	-	-	-	-	-	SSCRP	NCU00607	0	0	-	-	-	-	-	-	-	-	TRIREDRAFT_105533
jgi|Trire2|105532|fgenesh5_pg.C_scaffold_5000317	105532	fgenesh5_pg.C_scaffold_5000317	3.02656	8.14865	-0.365481	1.46316e-07	6.75169e-07	up in ∆ypr2	13	105532	TRIRE2_105532	5	983332	983411	2	1546	-	-	-	-	-	-	-	-	-	-	-	orphan protein	-	-	-	-	-	-	-	-	-	-	-	TRIREDRAFT_105532
jgi|Trire2|58802|e_gw1.5.84.1	58802	e_gw1.5.84.1	2.0923	4.26426	3.9463	9.61927e-36	2.40589e-34	up in ∆ypr2	13	58802	TRIRE2_58802	5	979795	981473	2	1547	CAZymes	0	Glycoside hydrolase	Glycoside hydrolase family95	candidate a-glycosidase distantly related to a-1,2-L-fucosidase	83589	52642	0	\N	Glycoside Hydrolase Family 95	related to a bacterial a-L-fucosidase	GH95 ?-L-fucosidase	-	-	-	ANID_06673	2543	6738	9280	+	conserved hypothetical protein	I	0	TRIREDRAFT_58802
jgi|Trire2|58699|e_gw1.5.872.1	58699	e_gw1.5.872.1	2.07034	4.19986	2.70367	3.33623e-17	3.43193e-16	up in ∆ypr2		58699	TRIRE2_58699	5	952758	953474	2	1556	-	-	-	-	-	-	-	-	-	-	-	unknown protein	NCU06747	0	0	-	-	-	-	-	-	-	-	TRIREDRAFT_58699
jgi|Trire2|105518|fgenesh5_pg.C_scaffold_5000303	105518	fgenesh5_pg.C_scaffold_5000303	1.35537	2.55862	4.43719	9.70861e-24	1.39146e-22	up in ∆ypr2		105518	TRIRE2_105518	5	947698	947828	2	1557	-	-	-	-	-	-	-	-	-	-	-	K+ channel	NCU04065	0	0	-	-	-	-	-	-	-	-	TRIREDRAFT_105518
jgi|Trire2|105514|fgenesh5_pg.C_scaffold_5000299	105514	fgenesh5_pg.C_scaffold_5000299	3.19838	9.1793	1.42528	3.66522e-14	3.15287e-13	up in ∆ypr2		105514	TRIRE2_105514	5	937032	937069	2	1561	-	-	-	-	-	-	-	-	-	-	-	orphan protein	-	-	-	-	-	-	-	-	-	-	-	TRIREDRAFT_105514
jgi|Trire2|120981|estExt_fgenesh5_pg.C_50287	120981	estExt_fgenesh5_pg.C_50287	1.1214	2.17558	6.9199	4.26645e-26	6.85165e-25	up in ∆ypr2		120981	TRIRE2_120981	5	919746	920341	2	1567	-	-	-	-	-	-	-	-	-	-	-	magnesium and cobalt transporter CorA	NCU07816	0	0	ANID_00042	1867	148307	150173	+	CorA family metal ion transporter	VIII	0	TRIREDRAFT_120981
jgi|Trire2|58580|e_gw1.5.790.1	58580	e_gw1.5.790.1	3.29402	9.80841	-0.150895	2.99006e-09	1.68063e-08	up in ∆ypr2		58580	TRIRE2_58580	5	802215	802376	2	1605	-	-	-	-	-	-	-	-	-	-	-	?-ketoglutarate dependent (FeII) oxygenase	-	-	-	ANID_02390	1151	120265	121415	+	conserved hypothetical protein	VII	PF03171.12,PF03171.13	TRIREDRAFT_58580
jgi|Trire2|58521|e_gw1.5.862.1	58521	e_gw1.5.862.1	6.24331	75.7572	-1.50859	8.37506e-06	3.05727e-05	up in ∆ypr2		58521	TRIRE2_58521	5	797438	798079	2	1607	-	-	-	-	-	-	-	-	-	-	-	SAM (and some other nucleotide) binding motif	-	-	-	ANID_03996	929	106073	107001	+	conserved hypothetical protein	II	PF08242.4,PF08241.5,PF08241.4,PF03141.9,PF08242.5,PF01209.11	TRIREDRAFT_58521
jgi|Trire2|76366|estExt_GeneWisePlus.C_50366	76366	estExt_GeneWisePlus.C_50366	3.92318	15.1703	6.67256	2.37585e-162	1.24788e-159	up in ∆ypr2		76366	TRIRE2_76366	5	790711	791733	2	1610	-	-	-	-	-	-	-	-	-	-	-	NADH:flavin oxidoreductase/12-oxophytodienoate reductase	-	-	-	ANID_01882	1497	229825	231321	-	NADH-dependent flavin oxidoreductase	VII	PF00724.12,PF00724.13	TRIREDRAFT_76366
jgi|Trire2|105458|fgenesh5_pg.C_scaffold_5000243	105458	fgenesh5_pg.C_scaffold_5000243	5.5034	45.3615	-1.99495	0.00144543	0.0036067	up in ∆ypr2		105458	TRIRE2_105458	5	787482	787526	2	1611	Transcription factors	0	C2H2 zinc finger	0	conserved hypothetical protein	0	0	0	-	-	-	C2H2 transcription factor	-	-	-	ANID_07362	3211	95877	99087	-	conserved hypothetical protein	IV	0	TRIREDRAFT_105458
jgi|Trire2|58952|e_gw1.5.8.1	58952	e_gw1.5.8.1	2.73648	6.66441	3.35927	1.98073e-27	3.32442e-26	up in ∆ypr2		58952	TRIRE2_58952	5	778394	780864	2	1613	Calcium signaling	0	Calcium ATPases	0	hypothetical Cation transporting ATPase, putative Ca2+ pump, related to S. cerevisiae Pmc1p and to N. crassa nca2/3	0	33876	YGL006W	\N	Cation transporting ATPase	Cation transporting ATPase	calcium transporting ATPase, ion pump	-	-	-	-	-	-	-	-	-	-	-	TRIREDRAFT_58952
jgi|Trire2|105447|fgenesh5_pg.C_scaffold_5000232	105447	fgenesh5_pg.C_scaffold_5000232	5.15045	35.5173	-0.417447	9.89475e-11	6.43015e-10	up in ∆ypr2		105447	TRIRE2_105447	5	753095	753132	2	1622	-	-	-	-	-	-	-	-	-	-	-	unknown protein	-	-	-	-	-	-	-	-	-	-	-	TRIREDRAFT_105447
jgi|Trire2|120943|estExt_fgenesh5_pg.C_50214	120943	estExt_fgenesh5_pg.C_50214	1.59056	3.01167	9.21203	2.10944e-25	3.28139e-24	up in ∆ypr2		120943	TRIRE2_120943	5	671103	674227	2	1636	-	-	-	-	-	-	-	-	\N	NAD-dependent glutamate dehydrogenase	\N	NAD-dependent glutamate dehydrogenase	NCU00461	gdh-1	0	ANID_07451	3637	85696	89332	-	NAD dependent glutamate dehydrogenase	IV	PF00208.13,PF00208.14,PF05088.5	TRIREDRAFT_120943
jgi|Trire2|59053|e_gw1.5.868.1	59053	e_gw1.5.868.1	1.82254	3.53704	4.21585	1.41265e-31	2.90635e-30	up in ∆ypr2		59053	TRIRE2_59053	5	658570	658740	2	1638	-	-	-	-	-	-	-	-	\N	adenosine/AMP deaminase	cd00443, ADA_AMPD, Adenosine/AMP deaminase	Adenosine/AMP deaminase	NCU00438	0	0	ANID_00662	1327	41363	42689	-	adenosine deaminase	VIII	PF00962.15,PF00962.14,TIGR01430	TRIREDRAFT_59053
jgi|Trire2|3094|fgenesh1_pm.C_scaffold_5000055	3094	fgenesh1_pm.C_scaffold_5000055	1.86678	3.64718	-0.388176	0.000251791	0.000721748	up in ∆ypr2		3094	TRIRE2_3094	5	496684	497551	2	1686	CAZymes	0	Glycoside hydrolase	Glycoside hydrolase family30	candidate b-1,6-glucanase; similar to T. harzianum BGN16.3 (GenBank acc no Q8J0I9)	43222	46824	0	\N	Glycoside Hydrolase Family 30	candidate b-1,6-glucanase	GH30 glucan endo 1,6-?-glucanase	NCU04395	neg-1	gh30-1	-	-	-	-	-	-	-	-	TRIREDRAFT_3094
jgi|Trire2|105363|fgenesh5_pg.C_scaffold_5000148	105363	fgenesh5_pg.C_scaffold_5000148	2.80899	7.00792	3.857	5.15543e-62	2.66086e-60	up in ∆ypr2		105363	TRIRE2_105363	5	447800	448150	2	1695	-	-	-	-	-	-	-	-	-	-	-	aldolase/citrate lyase family protein	-	-	-	-	-	-	-	-	-	-	-	TRIREDRAFT_105363
jgi|Trire2|59078|e_gw1.5.850.1	59078	e_gw1.5.850.1	1.41938	2.67471	2.3016	2.31968e-10	1.4535e-09	up in ∆ypr2		59078	TRIRE2_59078	5	436342	437142	2	1697	-	-	-	-	-	-	-	-	-	-	-	unknown protein	-	-	-	-	-	-	-	-	-	-	-	TRIREDRAFT_59078
jgi|Trire2|58244|e_gw1.5.88.1	58244	e_gw1.5.88.1	1.52862	2.88509	5.12423	1.53119e-30	3.00484e-29	up in ∆ypr2		58244	TRIRE2_58244	5	395926	398151	2	1711	-	-	-	-	-	-	-	-	-	-	-	unknown protein	NCU04669	0	0	ANID_06169	2399	126296	128694	+	conserved hypothetical protein	I	0	TRIREDRAFT_58244
jgi|Trire2|105342|fgenesh5_pg.C_scaffold_5000127	105342	fgenesh5_pg.C_scaffold_5000127	1.02784	2.03898	2.96342	0.000196457	0.000571389	up in ∆ypr2		105342	TRIRE2_105342	5	381625	381781	2	1717	-	-	-	-	-	-	-	-	-	-	-	Iron/ascorbate family oxidoreductases	-	-	-	-	-	-	-	-	-	-	-	TRIREDRAFT_105342
jgi|Trire2|21876|estExt_fgenesh1_pm.C_50041	21876	estExt_fgenesh1_pm.C_50041	3.78443	13.7793	4.31602	1.8211e-12	1.38271e-11	up in ∆ypr2		21876	TRIRE2_21876	5	380175	381137	2	1718	-	-	-	-	-	-	-	-	-	-	-	Zinc-binding oxidoreductase	-	-	-	-	-	-	-	-	-	-	-	TRIREDRAFT_21876
jgi|Trire2|58689|e_gw1.5.628.1	58689	e_gw1.5.628.1	1.13518	2.19646	1.91746	9.30486e-06	3.37188e-05	up in ∆ypr2		58689	TRIRE2_58689	5	349760	349904	2	1726	Secondary metabolism	0	Cytochrome P450	CypX (COG2124)	0	0	0	0	\N	sterol desaturase	similar to ERG5 C-22 sterol desaturase, a cytochrome P450 enzyme that catalyzes the formation of the C-22(23) double bond in the sterol side chain in ergosterol biosynthesis	ERG5 C-22 sterol desaturase, a cytochrome P450 enzyme that catalyzes the formation of the C-22(23) double bond in the sterol side chain in ergosterol biosynthesis	-	-	-	-	-	-	-	-	-	-	-	TRIREDRAFT_58689
jgi|Trire2|120911|estExt_fgenesh5_pg.C_50113	120911	estExt_fgenesh5_pg.C_50113	1.73072	3.31892	3.43522	2.16798e-22	2.93302e-21	up in ∆ypr2		120911	TRIRE2_120911	5	339585	339911	2	1729	-	-	-	-	-	-	-	-	-	-	-	short chain dehydrogenase/reductase	-	-	-	ANID_07193	1233	175474	176706	+	aldehyde reductase I	IV	PF00248.14,PF00248.13	TRIREDRAFT_120911
jgi|Trire2|58669|e_gw1.5.190.1	58669	e_gw1.5.190.1	1.20693	2.30845	1.80519	1.64139e-06	6.67493e-06	up in ∆ypr2		58669	TRIRE2_58669	5	331103	331299	2	1731	-	-	-	-	-	-	-	-	-	-	-	aspartyl protease	NCU09155	0	0	-	-	-	-	-	-	-	-	TRIREDRAFT_58669
jgi|Trire2|58672|e_gw1.5.791.1	58672	e_gw1.5.791.1	1.33533	2.52334	0.0554047	0.0017788	0.00435507	up in ∆ypr2		58672	TRIRE2_58672	5	283179	283610	2	1741	-	-	-	-	-	-	-	-	-	-	-	short chain dehydrogenase/reductase	-	-	-	-	-	-	-	-	-	-	-	TRIREDRAFT_58672
jgi|Trire2|105291|fgenesh5_pg.C_scaffold_5000076	105291	fgenesh5_pg.C_scaffold_5000076	2.57485	5.95807	2.07175	1.18836e-21	1.54677e-20	up in ∆ypr2		105291	TRIRE2_105291	5	199415	199786	2	1758	-	-	-	-	-	-	-	-	-	-	-	unknown protein	-	-	-	-	-	-	-	-	-	-	-	TRIREDRAFT_105291
jgi|Trire2|76238|estExt_GeneWisePlus.C_50107	76238	estExt_GeneWisePlus.C_50107	2.96746	7.82159	8.31354	4.48853e-85	4.21875e-83	up in ∆ypr2		76238	TRIRE2_76238	5	193774	196131	2	1760	-	-	-	-	-	-	-	-	-	-	-	plasma membrane H+ ATPase	-	-	-	ANID_04859	3623	21715	25337	+	plasma membrane H(+)ATPase	III	PF00702.19,TIGR01647,PF00702.18,PF00690.19,PF00122.12,PF00690.18,PF00122.13,TIGR01494	TRIREDRAFT_76238
jgi|Trire2|105287|fgenesh5_pg.C_scaffold_5000072	105287	fgenesh5_pg.C_scaffold_5000072	4.87084	29.2596	3.24635	1.01746e-75	7.50816e-74	up in ∆ypr2		105287	TRIRE2_105287	5	188288	188749	2	1762	-	-	-	-	-	-	-	-	-	-	-	unknown protein	-	-	-	-	-	-	-	-	-	-	-	TRIREDRAFT_105287
jgi|Trire2|58675|e_gw1.5.783.1	58675	e_gw1.5.783.1	1.8276	3.54946	2.03216	4.9311e-14	4.18534e-13	up in ∆ypr2		58675	TRIRE2_58675	5	175051	175478	2	1768	-	-	-	-	-	-	-	-	-	-	-	short chain dehydrogenase/reductase	-	-	-	-	-	-	-	-	-	-	-	TRIREDRAFT_58675
jgi|Trire2|59119|e_gw1.5.665.1	59119	e_gw1.5.665.1	1.9217	3.7887	-0.484077	0.000259391	0.000741627	up in ∆ypr2		59119	TRIRE2_59119	5	168381	169913	2	1771	-	-	-	-	-	-	-	-	-	-	-	amidohydrolase family protein	-	-	-	ANID_08593	1498	47973	49470	-	chlorohydrolase	III	PF01979.13,PF01979.12	TRIREDRAFT_59119
jgi|Trire2|58450|e_gw1.5.72.1	58450	e_gw1.5.72.1	1.13097	2.19005	0.772936	0.00241264	0.00573853	up in ∆ypr2		58450	TRIRE2_58450	5	160734	163124	2	1773	CAZymes	xyl3b	Glycoside hydrolase	Glycoside hydrolase family3	cadidate b-glycosidase distantly related to a-L-arabinofuanosidase / b-xylosidase	161158	192759	0	\N	Glycoside Hydrolase Family 3	candidate b-xylosidase.	GH3 ?-xylosidase XYL3b	NCU09923	gh3-7	0	-	-	-	-	-	-	-	-	TRIREDRAFT_58450
jgi|Trire2|105275|fgenesh5_pg.C_scaffold_5000060	105275	fgenesh5_pg.C_scaffold_5000060	1.23183	2.34864	2.8781	7.63871e-08	3.67292e-07	up in ∆ypr2		105275	TRIRE2_105275	5	157199	157762	2	1774	-	-	-	-	-	-	-	-	-	-	-	unknown protein, secreted, contains parallel beta-helix repeat	NCU09424	0	0	-	-	-	-	-	-	-	-	TRIREDRAFT_105275
jgi|Trire2|76230|estExt_GeneWisePlus.C_50075	76230	estExt_GeneWisePlus.C_50075	4.01505	16.1678	5.41761	1.97855e-110	2.94441e-108	up in ∆ypr2	14	76230	TRIRE2_76230	5	148362	148494	2	1777	-	-	-	-	-	-	-	-	-	-	-	Flavin-containing monooxygenase	-	-	-	ANID_05421	2044	122759	124802	-	steroid monooxygenase	V	0	TRIREDRAFT_76230
jgi|Trire2|58717|e_gw1.5.717.1	58717	e_gw1.5.717.1	3.7237	13.2113	3.21102	2.53442e-40	7.44401e-39	up in ∆ypr2	14	58717	TRIRE2_58717	5	146320	146735	2	1778	-	-	-	-	-	-	-	-	-	-	-	߀-lactamase class C	-	-	-	ANID_05422	1495	125651	127145	+	beta-lactamase	V	PF00144.17,PF00144.16	TRIREDRAFT_58717
jgi|Trire2|105269|fgenesh5_pg.C_scaffold_5000054	105269	fgenesh5_pg.C_scaffold_5000054	1.7773	3.42785	4.53173	1.71359e-36	4.35917e-35	up in ∆ypr2	14	105269	TRIRE2_105269	5	143211	145282	2	1779	Transcription factors	0	Zn2Cys6	0	conserved hypothetical protein	0	0	0	-	-	-	Zn2Cys6 transcriptional regulator	-	-	-	ANID_08978	2526	3903	6428	-	regulatory protein alcR	VII	PF00172.11,PF00172.10	TRIREDRAFT_105269
jgi|Trire2|58639|e_gw1.5.343.1	58639	e_gw1.5.343.1	3.36561	10.3074	2.29268	6.81916e-33	1.48871e-31	up in ∆ypr2	14	58639	TRIRE2_58639	5	141782	142141	2	1780	-	-	-	-	-	-	-	-	-	-	-	unknown protein	-	-	-	ANID_07186	907	155571	156477	+	conserved hypothetical protein	IV	0	TRIREDRAFT_58639
jgi|Trire2|3055|fgenesh1_pm.C_scaffold_5000016	3055	fgenesh1_pm.C_scaffold_5000016	3.65418	12.5898	3.88932	1.83155e-84	1.68597e-82	up in ∆ypr2	14	3055	TRIRE2_3055	5	140272	140623	2	1781	-	-	-	-	-	-	-	-	-	-	-	short chain dehydrogenase/reductase	NCU09821	0	0	ANID_03679	1046	422151	423196	+	general stress protein 39	II	PF00106.17,PF00106.18,PF08659.3	TRIREDRAFT_3055
jgi|Trire2|58701|e_gw1.5.247.1	58701	e_gw1.5.247.1	1.69103	3.22887	3.12778	5.95992e-20	7.03918e-19	up in ∆ypr2	14	58701	TRIRE2_58701	5	137510	138448	2	1782	-	-	-	-	-	-	-	-	\N	hexose-6-phosphate isomerase	\N	Mannose-6-phosphate isomerase	NCU02322	0	0	ANID_01715	1683	380185	381867	+	mannose-6-phosphate isomerase	VII	PF01238.13,PF01238.14,TIGR00218	TRIREDRAFT_58701
jgi|Trire2|105260|fgenesh5_pg.C_scaffold_5000045	105260	fgenesh5_pg.C_scaffold_5000045	3.68264	12.8406	5.79531	1.24474e-118	2.22286e-116	up in ∆ypr2	14	105260	TRIRE2_105260	5	126277	126308	2	1786	Transport	0	Sugar transporter	transporter containing IPR003663 domain	Predicted transporter (major facilitator superfamily)	80986	223834	YOL103W	-	-	-	MFS permease	-	-	-	-	-	-	-	-	-	-	-	TRIREDRAFT_105260
jgi|Trire2|3049|fgenesh1_pm.C_scaffold_5000010	3049	fgenesh1_pm.C_scaffold_5000010	1.45859	2.74839	6.12497	2.52225e-18	2.75219e-17	up in ∆ypr2		3049	TRIRE2_3049	5	111408	112328	2	1791	-	-	-	-	-	-	-	-	-	-	-	methionine aminopeptidase	-	-	-	-	-	-	-	-	-	-	-	TRIREDRAFT_3049
jgi|Trire2|58412|e_gw1.5.764.1	58412	e_gw1.5.764.1	2.41217	5.32275	-0.434585	9.76221e-06	3.52902e-05	up in ∆ypr2		58412	TRIRE2_58412	5	101859	102152	2	1794	-	-	-	-	-	-	-	-	\N	\N	COG1064, AdhP, Zn-dependent alcohol dehydrogenases	AdhP Zn-dependent alcohol dehydrogenases	NCU08402	0	0	ANID_05355	1151	267703	268853	+	zinc-binding alcohol dehydrogenase	V	PF00107.18,PF00107.19,PF08240.5,PF08240.4	TRIREDRAFT_58412
jgi|Trire2|120877|estExt_fgenesh5_pg.C_50028	120877	estExt_fgenesh5_pg.C_50028	1.27511	2.42018	5.83412	7.13837e-37	1.85286e-35	up in ∆ypr2		120877	TRIRE2_120877	5	85539	85948	2	1800	-	-	-	-	-	-	-	-	-	-	-	Zn-dependent ߀-lactamase	NCU07111	0	0	ANID_01826	1026	83424	84449	+	metallo-beta-lactamase domain-containing protein	VII	PF00753.19,PF00753.20	TRIREDRAFT_120877
jgi|Trire2|58285|e_gw1.5.446.1	58285	e_gw1.5.446.1	1.20075	2.2986	1.17485	5.64711e-05	0.000180793	up in ∆ypr2		58285	TRIRE2_58285	5	25618	30062	2	1814	Secondary metabolism	tex11	PKS/NRPS Hybrid	PKS/NRPS Hybrid	PKS/NRPS Hybrid	0	192717	YBR115C	\N	polyketide synthase/non-ribosomal peptide synthase hybrid	candidate polyketide synthase - non-ribosomal peptide synthase hybrid	PKS-NRPS	-	-	-	ANID_08412	11936	92194	104129	+	polyketide synthase	Unmapped scaffolds	PF00109.19,PF00106.17,PF00550.17,PF07993.5,PF08242.4,PF07993.4,PF00106.18,PF08241.5,PF10294.2,PF08659.2,PF00698.13,PF00668.13,PF08241.4,PF00698.14,PF00550.18,PF02801.14,PF00501.21,PF02801.15,PF08242.5,PF01370.14,PF01209.11,PF00501.20,PF00668.12,TIGR01733,PF00109.18,PF08659.3	TRIREDRAFT_58285
jgi|Trire2|69944|e_gw1.31.80.1	69944	e_gw1.31.80.1	1.00206	2.00286	6.49303	9.12333e-12	6.55896e-11	up in ∆ypr2	15	69944	TRIRE2_69944	31	182991	183161	3	15	CAZymes	0	Glycoside hydrolase	Glycoside hydrolase family31	candidate a-xylosidase	55060	34797	YBR229C	\N	Glycoside Hydrolase Family 31	candidate a-xylosidase	GH31 ?-xylosidase/?-glucosidase	-	-	-	ANID_07505	2654	256000	258653	-	alpha-xylosidase	IV	PF01055.19,PF01055.18	TRIREDRAFT_69944
jgi|Trire2|69957|e_gw1.31.88.1	69957	e_gw1.31.88.1	1.96482	3.90363	6.96142	1.01354e-73	7.18248e-72	up in ∆ypr2	15	69957	TRIRE2_69957	31	179270	179459	3	16	Transport	0	Sugar transporter	transporter containing IPR003663 domain	Predicted transporter (major facilitator superfamily) / hypothetical maltose permease	83926	34676	YBR298C	\N	maltose permease	\N	MFS permease	-	-	-	-	-	-	-	-	-	-	-	TRIREDRAFT_69957
jgi|Trire2|112022|fgenesh5_pg.C_scaffold_31000060	112022	fgenesh5_pg.C_scaffold_31000060	2.06702	4.19019	1.52042	2.4656e-13	1.98515e-12	up in ∆ypr2	15	112022	TRIRE2_112022	31	177387	177399	3	17	-	-	-	-	-	-	-	-	-	-	-	glutathione-S-transferase	-	-	-	-	-	-	-	-	-	-	-	TRIREDRAFT_112022
jgi|Trire2|69896|e_gw1.31.47.1	69896	e_gw1.31.47.1	2.33486	5.04502	-0.6743	0.000117571	0.000356709	up in ∆ypr2	15	69896	TRIRE2_69896	31	174726	175131	3	18	-	-	-	-	-	-	-	-	-	-	-	alpha/beta hydrolase	-	-	-	-	-	-	-	-	-	-	-	TRIREDRAFT_69896
jgi|Trire2|112014|fgenesh5_pg.C_scaffold_31000052	112014	fgenesh5_pg.C_scaffold_31000052	1.89011	3.70663	2.92619	3.38896e-22	4.54355e-21	up in ∆ypr2		112014	TRIRE2_112014	31	153922	154156	3	25	-	-	-	-	-	-	-	-	-	-	-	unknown protein	-	-	-	-	-	-	-	-	-	-	-	TRIREDRAFT_112014
jgi|Trire2|112001|fgenesh5_pg.C_scaffold_31000039	112001	fgenesh5_pg.C_scaffold_31000039	2.48883	5.61323	5.52696	9.38416e-98	1.11722e-95	up in ∆ypr2		112001	TRIRE2_112001	31	123355	123837	3	34	-	-	-	-	-	-	-	-	-	-	-	unknown protein	-	-	-	-	-	-	-	-	-	-	-	TRIREDRAFT_112001
jgi|Trire2|5849|fgenesh1_pm.C_scaffold_31000013	5849	fgenesh1_pm.C_scaffold_31000013	1.30309	2.46757	5.14167	1.55914e-20	1.90186e-19	up in ∆ypr2		5849	TRIRE2_5849	31	103227	103712	3	41	-	-	-	-	-	-	-	-	-	-	-	unknown protein, Duf967	-	-	-	ANID_11862	657	186402	187058	+	DUF967 domain-containing protein	VII	PF03928.6,PF03928.7	TRIREDRAFT_5849
jgi|Trire2|124030|estExt_fgenesh5_pg.C_310021	124030	estExt_fgenesh5_pg.C_310021	1.05096	2.0719	5.11954	7.01376e-21	8.68597e-20	up in ∆ypr2		124030	TRIRE2_124030	31	71851	72084	3	50	-	-	-	-	-	-	-	-	-	-	-	unknown protein with TIM barrel	NCU00864	0	0	ANID_08932	939	54898	55836	+	TIM-barrel enzyme family protein	VII	PF09370.2,PF09370.3	TRIREDRAFT_124030
jgi|Trire2|69885|e_gw1.31.23.1	69885	e_gw1.31.23.1	1.93328	3.81924	4.11231	5.1016e-37	1.33194e-35	up in ∆ypr2		69885	TRIRE2_69885	31	66063	66184	3	53	-	-	-	-	-	-	-	-	\N	Hypothetical protein	\N	initiation factor 2B	NCU11341	0	0	ANID_02410	1748	188535	190282	+	translation initiation factor eIF-2B subunit family protein	VII	PF01008.10,PF00293.20,PF00293.21	TRIREDRAFT_69885
jgi|Trire2|70829|e_gw1.41.13.1	70829	e_gw1.41.13.1	1.20364	2.3032	1.88996	1.01032e-06	4.19781e-06	up in ∆ypr2		70829	TRIRE2_70829	41	57084	57659	3	72	-	-	-	-	-	-	-	-	-	-	-	MFS multidrug transporter, putative	-	-	-	ANID_08610	1637	92669	94305	-	MFS multidrug transporter	III	PF07690.9,PF07690.8,PF00083.17,TIGR00880	TRIREDRAFT_70829
jgi|Trire2|123659|estExt_fgenesh5_pg.C_250001	123659	estExt_fgenesh5_pg.C_250001	4.05638	16.6376	7.2834	9.01148e-157	4.02318e-154	up in ∆ypr2		123659	TRIRE2_123659	25	5490	5633	3	92	Effector proteins (competition and defense)	0	Tandem repeat proteins	0	Tandem repeats: possible associate to cell wall, no signal peptide in T. virens	308283	228928	YJL158C	\N	cell wall protein	Putative cell wall protein. Distantly related to S. cerevisiae Pir3p.	cell wall protein, istantly related to S. cerevisiae Pir3p.	NCU04033	0	0	-	-	-	-	-	-	-	-	TRIREDRAFT_123659
jgi|Trire2|51686|estExt_Genewise1.C_250006	51686	estExt_Genewise1.C_250006	1.57913	2.98789	6.96022	3.1387e-48	1.12552e-46	up in ∆ypr2		51686	TRIRE2_51686	25	8920	8969	3	94	-	-	-	-	-	-	-	-	-	-	-	Dienelactone hydrolase	NCU07127	0	0	ANID_03712	1011	512770	513780	+	dienelactone hydrolase	II	PF01738.10,PF01738.11	TRIREDRAFT_51686
jgi|Trire2|68566|e_gw1.25.36.1	68566	e_gw1.25.36.1	1.64771	3.13335	4.65916	8.71633e-36	2.18618e-34	up in ∆ypr2		68566	TRIRE2_68566	25	45505	47253	3	104	-	-	-	-	-	-	-	-	-	-	-	unknown protein	NCU02046	0	0	ANID_04922	1962	222535	224496	-	conserved hypothetical protein	III	0	TRIREDRAFT_68566
jgi|Trire2|123686|estExt_fgenesh5_pg.C_250056	123686	estExt_fgenesh5_pg.C_250056	1.20349	2.30296	8.12868	9.53785e-10	5.61394e-09	up in ∆ypr2		123686	TRIRE2_123686	25	161789	162056	3	140	-	-	-	-	-	-	-	-	-	-	-	unknown protein	-	-	-	-	-	-	-	-	-	-	-	TRIREDRAFT_123686
jgi|Trire2|123687|estExt_fgenesh5_pg.C_250057	123687	estExt_fgenesh5_pg.C_250057	1.76924	3.40875	2.5017	4.15076e-17	4.24051e-16	up in ∆ypr2		123687	TRIRE2_123687	25	163859	165100	3	141	-	-	-	-	-	-	-	-	-	-	-	unknown protein	-	-	-	-	-	-	-	-	-	-	-	TRIREDRAFT_123687
jgi|Trire2|123697|estExt_fgenesh5_pg.C_250075	123697	estExt_fgenesh5_pg.C_250075	1.48503	2.79923	7.95477	1.48824e-30	2.92698e-29	up in ∆ypr2		123697	TRIRE2_123697	25	193267	193351	3	155	Sexual development	MSC1	meiotic recombination	others	Mutant is defective in directing meiotic recombination events to homologous chromatids,	151996	72979	YML128C	-	-	-	MSC1, involved in meiotic recombination	NCU04415	0	0	ANID_04940	1962	275618	277579	-	conserved hypothetical protein	III	PF10281.1,PF10281.2	TRIREDRAFT_123697
jgi|Trire2|111237|fgenesh5_pg.C_scaffold_25000079	111237	fgenesh5_pg.C_scaffold_25000079	3.14953	8.87367	1.16846	7.52687e-14	6.26351e-13	up in ∆ypr2	16	111237	TRIRE2_111237	25	199951	199974	3	158	-	-	-	-	-	-	-	-	-	-	-	orphan protein	-	-	-	-	-	-	-	-	-	-	-	TRIREDRAFT_111237
jgi|Trire2|123699|estExt_fgenesh5_pg.C_250079	123699	estExt_fgenesh5_pg.C_250079	1.00538	2.00747	5.47889	2.35621e-19	2.7042e-18	up in ∆ypr2	16	123699	TRIRE2_123699	25	201259	202468	3	159	Transcription factors	0	Zn2Cys6	0	fungal specific transcription factor, putative	299684	140473	YLR228C	\N	N-terminal binuclear Zn cluster-containing/DNA binding domain-containing protein	\N	Zn2Cys6 transcriptional regulator	-	-	-	ANID_05052	2278	618777	621054	-	C6 transcription factor	III	PF04082.10,PF04082.11	TRIREDRAFT_123699
jgi|Trire2|111239|fgenesh5_pg.C_scaffold_25000081	111239	fgenesh5_pg.C_scaffold_25000081	1.18724	2.27716	3.36718	1.25685e-09	7.31104e-09	up in ∆ypr2	16	111239	TRIRE2_111239	25	204248	207516	3	160	-	-	-	-	-	-	-	-	-	-	-	unknown protein	-	-	-	-	-	-	-	-	-	-	-	TRIREDRAFT_111239
jgi|Trire2|111245|fgenesh5_pg.C_scaffold_25000087	111245	fgenesh5_pg.C_scaffold_25000087	2.16844	4.49536	3.30924	1.95411e-31	4.01108e-30	up in ∆ypr2		111245	TRIRE2_111245	25	222903	222925	3	165	CAZymes	0	Polysaccharide lyase	Polysaccharide lyase family8	0	318424	62770	0	\N	Polysaccharide Lyase Family 8	candidate polysaccharide lyase; distantly related to chondroitin lyases	PL8 polysaccharide lyase; distantly related to chondroitin lyases	-	-	-	-	-	-	-	-	-	-	-	TRIREDRAFT_111245
jgi|Trire2|81511|estExt_GeneWisePlus.C_250149	81511	estExt_GeneWisePlus.C_250149	1.27919	2.42703	4.62227	5.49309e-24	7.97525e-23	up in ∆ypr2		81511	TRIRE2_81511	25	226639	226829	3	166	-	-	-	-	-	-	-	-	-	-	-	formamidase	NCU02361	0	0	ANID_04577	1466	325415	326880	-	formamidase	III	PF03069.8,PF03069.7	TRIREDRAFT_81511
jgi|Trire2|68470|e_gw1.25.180.1	68470	e_gw1.25.180.1	1.19898	2.29577	1.66248	6.65896e-06	2.46713e-05	up in ∆ypr2		68470	TRIRE2_68470	25	232211	233776	3	168	CAZymes	0	Glycosyl transferase	Glycosyl transferase family4	0	39427	33447	YPL175W	\N	Glycosyltransferase Family 4	candidate a-glycosyltransferase	GT4 glycosyl transferase	-	-	-	-	-	-	-	-	-	-	-	TRIREDRAFT_68470
jgi|Trire2|81522|estExt_GeneWisePlus.C_250164	81522	estExt_GeneWisePlus.C_250164	1.21081	2.31468	7.49444	1.7692e-25	2.76658e-24	up in ∆ypr2		81522	TRIRE2_81522	25	257676	257805	3	175	-	-	-	-	-	-	-	-	\N	Selenocysteine lyase-like protein	COG0520, CsdB, Selenocysteine lyase	Selenocysteine lyase-like protein	NCU11365	0	0	ANID_06227	1520	27365	28884	-	aminotransferase	I	PF00155.14,PF00266.12	TRIREDRAFT_81522
jgi|Trire2|123710|estExt_fgenesh5_pg.C_250102	123710	estExt_fgenesh5_pg.C_250102	1.06097	2.08633	3.85379	1.59669e-10	1.01908e-09	up in ∆ypr2		123710	TRIRE2_123710	25	270350	270751	3	180	Transcription factors	0	Zn2Cys6	0	conserved hypothetical protein	242742	140811	0	-	-	-	Zn2Cys6 transcriptional regulator	-	-	-	-	-	-	-	-	-	-	-	TRIREDRAFT_123710
jgi|Trire2|68608|e_gw1.25.221.1	68608	e_gw1.25.221.1	1.55809	2.94464	9.18346	1.33629e-28	2.40074e-27	up in ∆ypr2		68608	TRIRE2_68608	25	285803	285897	3	182	-	-	-	-	-	-	-	-	thi4	Thiazole biosynthetic enzyme	\N	Thiazole biosynthetic enzyme (Stress-inducible protein sti35)	NCU06110	0	0	ANID_03928	1554	77342	78895	-	thiazole biosynthetic enzyme	II	PF05834.5,PF01266.17,TIGR00292,PF01946.9,PF01946.10	TRIREDRAFT_68608
jgi|Trire2|81536|estExt_GeneWisePlus.C_250195	81536	estExt_GeneWisePlus.C_250195	1.676	3.19541	3.41437	6.50873e-17	6.5817e-16	up in ∆ypr2		81536	TRIRE2_81536	25	318118	320145	3	189	Calcium signaling	0	Calcium ATPases	0	hypothetical Cation transporting ATPase, putative Ca2+ pump, related to S. cerevisiae Ena2p	0	34827	YDR039C	\N	Cation transporting ATPase	Cation transporting ATPase	cation transporting ATPase	NCU07966	0	0	-	-	-	-	-	-	-	-	TRIREDRAFT_81536
jgi|Trire2|123718|estExt_fgenesh5_pg.C_250118	123718	estExt_fgenesh5_pg.C_250118	3.62447	12.3332	5.48663	6.63313e-137	1.6452e-134	up in ∆ypr2		123718	TRIRE2_123718	25	329551	330056	3	192	-	-	-	-	-	-	-	-	\N	Transmembrane amino acid transporter	pfam01490, Aa_trans, Transmembrane amino acid transporter protein	amino acid transporter, neutral 11 TM	-	-	-	-	-	-	-	-	-	-	-	TRIREDRAFT_123718
jgi|Trire2|68574|e_gw1.25.174.1	68574	e_gw1.25.174.1	4.68454	25.715	2.23798	3.29457e-44	1.07362e-42	up in ∆ypr2	17	68574	TRIRE2_68574	25	362041	363339	3	200	-	-	-	-	-	-	-	-	-	-	-	unknown protein	-	-	-	ANID_03528	1527	8141	9667	+	conserved hypothetical protein	II	PF12051.1	TRIREDRAFT_68574
jgi|Trire2|81553|estExt_GeneWisePlus.C_250221	81553	estExt_GeneWisePlus.C_250221	1.30903	2.47775	6.10417	1.97009e-34	4.58098e-33	up in ∆ypr2	17	81553	TRIRE2_81553	25	364757	365011	3	201	-	-	-	-	-	-	-	-	-	-	-	short chain dehydrogenase/reductase	NCU03566	0	0	ANID_05557	1103	52492	53594	+	short chain dehydrogenase/reductase	V	PF00106.17,PF00106.18,PF08659.3	TRIREDRAFT_81553
jgi|Trire2|123726|estExt_fgenesh5_pg.C_250133	123726	estExt_fgenesh5_pg.C_250133	3.46247	11.0232	6.18935	5.63294e-169	3.86896e-166	up in ∆ypr2	17	123726	TRIRE2_123726	25	369499	370281	3	202	CAZymes	0	Glycoside hydrolase	Glycoside hydrolase family16	candidate endo-1,3(4)-b-glucanase	37969	55235	YJL171C	\N	Glycoside Hydrolase Family 16	candidate b-1,3-1,4-glucanase	GH16 glucan endo-1,3(4)-?-D-glucosidase	NCU04431	0	0	ANID_06620	1226	151010	152235	-	conserved hypothetical protein	I	PF03935.8,PF00722.14	TRIREDRAFT_123726
jgi|Trire2|68508|e_gw1.25.101.1	68508	e_gw1.25.101.1	1.45824	2.74772	1.99874	4.27612e-10	2.61875e-09	up in ∆ypr2	17	68508	TRIRE2_68508	25	371019	371357	3	203	-	-	-	-	-	-	-	-	-	-	-	unknown protein	NCU07782	0	0	ANID_03599	1183	166563	167745	-	conserved hypothetical protein	II	PF03061.15	TRIREDRAFT_68508
jgi|Trire2|68427|e_gw1.25.249.1	68427	e_gw1.25.249.1	1.71715	3.28787	1.78454	8.596e-12	6.18682e-11	up in ∆ypr2	17	68427	TRIRE2_68427	25	372332	373036	3	204	-	-	-	-	-	-	-	-	-	-	-	metal-dependent phosphohydrolase	NCU10889	0	0	-	-	-	-	-	-	-	-	TRIREDRAFT_68427
jgi|Trire2|68590|e_gw1.25.79.1	68590	e_gw1.25.79.1	2.00336	4.00933	3.20929	3.85182e-28	6.77025e-27	up in ∆ypr2	17	68590	TRIRE2_68590	25	373643	374136	3	205	-	-	-	-	-	-	-	-	\N	alcohol dehydrogenase	\N	Alcohol dehydrogenase, class V	-	-	-	ANID_11861	1259	184944	186202	+	alcohol dehydrogenase	VII	PF00107.18,PF00107.19,PF08240.5,PF08240.4	TRIREDRAFT_68590
jgi|Trire2|123732|estExt_fgenesh5_pg.C_250146	123732	estExt_fgenesh5_pg.C_250146	1.64556	3.12869	3.96408	4.85534e-28	8.46745e-27	up in ∆ypr2		123732	TRIRE2_123732	25	395788	404100	3	212	Effector proteins (competition and defense)	0	Tandem repeat proteins	0	Tandem repeats	0	217588	YBR016W	-	-	-	orphan protein	-	-	-	-	-	-	-	-	-	-	-	TRIREDRAFT_123732
jgi|Trire2|111306|fgenesh5_pg.C_scaffold_25000148	111306	fgenesh5_pg.C_scaffold_25000148	1.68386	3.21286	1.40899	0.000977606	0.00251268	up in ∆ypr2		111306	TRIRE2_111306	25	406433	407955	3	213	-	-	-	-	-	-	-	-	-	-	-	unknown protein	-	-	-	-	-	-	-	-	-	-	-	TRIREDRAFT_111306
jgi|Trire2|108024|fgenesh5_pg.C_scaffold_10000414	108024	fgenesh5_pg.C_scaffold_10000414	3.19293	9.14468	0.0274002	4.00993e-06	1.53602e-05	up in ∆ypr2		108024	TRIRE2_108024	10	1142314	1143921	3	222	-	-	-	-	-	-	-	-	-	-	-	unknown protein	-	-	-	-	-	-	-	-	-	-	-	TRIREDRAFT_108024
jgi|Trire2|62380|e_gw1.10.113.1	62380	e_gw1.10.113.1	4.31186	19.8609	6.83952	8.49879e-143	2.29957e-140	up in ∆ypr2		62380	TRIRE2_62380	10	1127990	1128290	3	225	Transport	0	Sugar transporter	transporter containing IPR003663 domain	MSF major facilitator, putative galactose permease	153153	32818	YLR081W	\N	galactose permease	\N	MFS permease (galactose permease ?)	-	-	-	ANID_04277	2194	3542	5735	-	sugar transporter	II	PF07690.9,TIGR00879,PF07690.8,PF00083.17,PF00083.16	TRIREDRAFT_62380
jgi|Trire2|4179|fgenesh1_pm.C_scaffold_10000157	4179	fgenesh1_pm.C_scaffold_10000157	1.53731	2.90252	0.708985	1.29159e-05	4.56195e-05	up in ∆ypr2		4179	TRIRE2_4179	10	1119932	1120390	3	228	-	-	-	-	-	-	-	-	-	-	-	isoflavone reductase family protein	NCU06945	0	0	ANID_08354	1021	35088	36108	-	isoflavone reductase	Unmapped scaffolds	PF05368.6,PF01118.17,PF05368.5	TRIREDRAFT_4179
jgi|Trire2|62622|e_gw1.10.125.1	62622	e_gw1.10.125.1	1.03585	2.05032	2.73435	6.9115e-07	2.92201e-06	up in ∆ypr2		62622	TRIRE2_62622	10	1118204	1118986	3	229	Transcription factors	0	Zn2Cys6	0	hypothetical protein	0	0	YAL051W	-	-	-	Zn2Cys6 transcriptional regulator	-	-	-	-	-	-	-	-	-	-	-	TRIREDRAFT_62622
jgi|Trire2|62611|e_gw1.10.7.1	62611	e_gw1.10.7.1	1.08222	2.11729	7.00802	2.76274e-21	3.52912e-20	up in ∆ypr2		62611	TRIRE2_62611	10	1091586	1092922	3	237	Transport	0	ABC transporter	transporter containing IPR003439 domain	0	0	20223	YDR135C	-	-	-	MRP-type ABC transporter	-	-	-	-	-	-	-	-	-	-	-	TRIREDRAFT_62611
jgi|Trire2|62581|e_gw1.10.556.1	62581	e_gw1.10.556.1	1.17962	2.26517	4.11854	1.48942e-16	1.46627e-15	up in ∆ypr2		62581	TRIRE2_62581	10	1087299	1087433	3	239	-	-	-	-	-	-	-	-	\N	gluconolactonase-like protein	\N	gluconolactonase-like protein	NCU01866	0	0	ANID_08977	1118	1524	2641	-	conserved hypothetical protein	VII	PF03088.8,PF03088.9,PF08450.4,PF08450.5	TRIREDRAFT_62581
jgi|Trire2|4171|fgenesh1_pm.C_scaffold_10000149	4171	fgenesh1_pm.C_scaffold_10000149	3.65302	12.5797	0.909014	2.38832e-19	2.73752e-18	up in ∆ypr2		4171	TRIRE2_4171	10	1057036	1057206	3	251	Calcium signaling	0	Calcium transporters	0	hypothetical Ca2+ transporter; putative Ca2+/sodium exchanger	0	51695	0	\N	Ca2+ transporter	hypothetical Ca2+ transporter	calcium transporter	NCU08490	0	0	-	-	-	-	-	-	-	-	TRIREDRAFT_4171
jgi|Trire2|62522|e_gw1.10.297.1	62522	e_gw1.10.297.1	2.33611	5.0494	1.06541	4.23272e-09	2.34308e-08	up in ∆ypr2		62522	TRIRE2_62522	10	1055907	1056254	3	252	-	-	-	-	-	-	-	-	-	-	-	SSCRP	-	-	-	-	-	-	-	-	-	-	-	TRIREDRAFT_62522
jgi|Trire2|107971|fgenesh5_pg.C_scaffold_10000361	107971	fgenesh5_pg.C_scaffold_10000361	1.48092	2.79128	2.35032	5.54405e-11	3.7053e-10	up in ∆ypr2		107971	TRIRE2_107971	10	999130	999406	3	270	-	-	-	-	-	-	-	-	-	-	-	SSCRP	-	-	-	-	-	-	-	-	-	-	-	TRIREDRAFT_107971
jgi|Trire2|122140|estExt_fgenesh5_pg.C_100356	122140	estExt_fgenesh5_pg.C_100356	1.27551	2.42085	4.78501	2.9293e-25	4.5174e-24	up in ∆ypr2		122140	TRIRE2_122140	10	998149	998817	3	271	-	-	-	-	-	-	-	-	-	-	-	orphan protein	-	-	-	-	-	-	-	-	-	-	-	TRIREDRAFT_122140
jgi|Trire2|32243|gw1.10.276.1	32243	gw1.10.276.1	1.2977	2.45836	4.31568	2.49618e-21	3.19776e-20	up in ∆ypr2	18	32243	TRIRE2_32243	10	947642	947750	3	290	CAZymes	0	Carbohydrate esterase	Carbohydrate esterase family1	0	302595	83633	YKL094W	-	-	-	CE1 Alpha/beta hydrolase	-	-	-	ANID_04531	2005	200756	202760	+	alpha/beta hydrolase	III	PF00561.13,PF00561.12,PF03096.7	TRIREDRAFT_32243
jgi|Trire2|78462|estExt_GeneWisePlus.C_100526	78462	estExt_GeneWisePlus.C_100526	2.61842	6.14077	2.84375	4.99192e-33	1.10056e-31	up in ∆ypr2	18	78462	TRIRE2_78462	10	944995	945516	3	291	-	-	-	-	-	-	-	-	-	-	-	L-carnitine dehydratase/alpha-methylacyl-CoA racemase	NCU00052	0	0	ANID_03895	1860	197834	199693	+	CAIB/BAIF family enzyme	II	PF02515.9,PF02515.10	TRIREDRAFT_78462
jgi|Trire2|62165|e_gw1.10.259.1	62165	e_gw1.10.259.1	2.04616	4.13004	3.82968	1.3964e-38	3.81299e-37	up in ∆ypr2	18	62165	TRIRE2_62165	10	943134	943316	3	292	-	-	-	-	-	-	-	-	-	-	-	catechol dioxigenase	NCU00055	0	0	ANID_04532	1062	203183	204244	+	catechol dioxygenase	III	PF04444.6,PF00775.14,PF00775.13,PF04444.7	TRIREDRAFT_62165
jgi|Trire2|4146|fgenesh1_pm.C_scaffold_10000124	4146	fgenesh1_pm.C_scaffold_10000124	2.98498	7.91712	3.23662	5.94081e-48	2.10498e-46	up in ∆ypr2	18	4146	TRIRE2_4146	10	941073	941495	3	293	-	-	-	-	-	-	-	-	-	-	-	flavoprotein monooxygenase	-	-	-	ANID_02653	1505	48160	49664	+	salicylate hydroxylase	VI	PF01266.17,PF00890.17,PF01262.14,PF00070.20,PF01494.12,PF07992.7	TRIREDRAFT_4146
jgi|Trire2|62576|e_gw1.10.221.1	62576	e_gw1.10.221.1	1.58409	2.99818	5.3109	5.17984e-41	1.56253e-39	up in ∆ypr2	18	62576	TRIRE2_62576	10	935752	936463	3	295	-	-	-	-	-	-	-	-	-	-	-	alpha/beta hydrolase	NCU06058	0	0	ANID_06723	1108	123255	124362	+	amidohydrolase	I	PF04909.6,PF04909.7	TRIREDRAFT_62576
jgi|Trire2|62693|e_gw1.10.362.1	62693	e_gw1.10.362.1	1.03135	2.04394	6.56777	1.53243e-18	1.67685e-17	up in ∆ypr2		62693	TRIRE2_62693	10	900880	902825	3	304	Transport	STE6	ABC transporter	transporter containing IPR003439 domain	TRE62693, candidate ABC-transporter, related to a-factor exporter Ste6p (26 % identity)	268603	182026	YKL209C	\N	ABC-transporter	candidate ABC-transporter, related to a-factor exporter Ste6p	ABC-transporter Ste6p	NCU09443	0	0	-	-	-	-	-	-	-	-	TRIREDRAFT_62693
jgi|Trire2|122110|estExt_fgenesh5_pg.C_100304	122110	estExt_fgenesh5_pg.C_100304	1.31058	2.48041	5.24075	7.73157e-33	1.67969e-31	up in ∆ypr2	19	122110	TRIRE2_122110	10	861721	861823	3	316	Lipid Metabolism	0	Triglyceride utilization	Acyl-CoA synthetase	Acyl-CoA synthetase	230369	49433	YBR222C	-	-	-	4-coumarate:coenzyme A ligase	NCU10546	0	0	ANID_10657	1709	73757	75465	-	4-coumarate-CoA ligase 2	V	PF00501.21,PF00501.20	TRIREDRAFT_122110
jgi|Trire2|107914|fgenesh5_pg.C_scaffold_10000304	107914	fgenesh5_pg.C_scaffold_10000304	1.91325	3.76655	0.981359	5.68303e-09	3.09602e-08	up in ∆ypr2	19	107914	TRIRE2_107914	10	855294	855303	3	318	-	-	-	-	-	-	-	-	-	-	-	orphan protein	-	-	-	-	-	-	-	-	-	-	-	TRIREDRAFT_107914
jgi|Trire2|107913|fgenesh5_pg.C_scaffold_10000303	107913	fgenesh5_pg.C_scaffold_10000303	1.98921	3.9702	1.18093	6.97733e-11	4.6217e-10	up in ∆ypr2	19	107913	TRIRE2_107913	10	853098	853111	3	319	-	-	-	-	-	-	-	-	-	-	-	orphan protein	-	-	-	-	-	-	-	-	-	-	-	TRIREDRAFT_107913
jgi|Trire2|62367|e_gw1.10.53.1	62367	e_gw1.10.53.1	1.57202	2.97322	4.21954	6.67477e-26	1.06048e-24	up in ∆ypr2	19	62367	TRIRE2_62367	10	850000	850221	3	320	Sulfur metabolism	0	sulfur assimilation	EC number 1.8.3.1	sulfite oxidase	313009	213747	YMR272C	\N	sulfite oxidase-like protein	\N	Sulfite oxidase, molybdopterin-binding component	NCU06931	0	0	ANID_08058	1264	128956	130219	-	sulfite oxidase	II	PF00174.12,PF00174.11,PF03404.8,PF03404.9	TRIREDRAFT_62367
jgi|Trire2|62651|e_gw1.10.426.1	62651	e_gw1.10.426.1	1.10617	2.15273	4.75324	3.60599e-18	3.89804e-17	up in ∆ypr2		62651	TRIRE2_62651	10	764264	765433	3	347	Lipid Metabolism	fat1	Triglyceride utilization	Acyl-CoA synthetase	Very long-chain acyl-CoA synthetase/fatty acid transporter	322594	49558	YBR041W	-	-	-	long-chain fatty acid transporter,	NCU06032	0	0	ANID_05192	2021	114780	116800	-	long-chain fatty acid transporter	V	PF00501.21,PF00501.20	TRIREDRAFT_62651
jgi|Trire2|122089|estExt_fgenesh5_pg.C_100260	122089	estExt_fgenesh5_pg.C_100260	1.47103	2.77219	6.20199	3.08183e-47	1.07913e-45	up in ∆ypr2		122089	TRIRE2_122089	10	742289	742629	3	352	-	-	-	-	-	-	-	-	-	-	-	unknown protein	NCU09169	0	0	ANID_04608	1105	49366	50470	-	NmrA family transcriptional regulator	III	PF05368.6,PF01073.12,PF05368.5	TRIREDRAFT_122089
jgi|Trire2|107853|fgenesh5_pg.C_scaffold_10000243	107853	fgenesh5_pg.C_scaffold_10000243	4.04486	16.5053	1.64629	2.75507e-30	5.34784e-29	up in ∆ypr2		107853	TRIRE2_107853	10	694655	694775	3	371	-	-	-	-	-	-	-	-	-	-	-	unknown protein	-	-	-	-	-	-	-	-	-	-	-	TRIREDRAFT_107853
jgi|Trire2|107852|fgenesh5_pg.C_scaffold_10000242	107852	fgenesh5_pg.C_scaffold_10000242	1.02277	2.03181	1.07991	0.0005263	0.00142146	up in ∆ypr2		107852	TRIRE2_107852	10	692761	692906	3	372	-	-	-	-	-	-	-	-	-	-	-	Alcohol dehydrogenase, class V	-	-	-	ANID_05913	1612	40830	42441	+	alcohol dehydrogenase	I	PF00107.18,PF00107.19,PF08240.5,PF08240.4	TRIREDRAFT_107852
jgi|Trire2|4114|fgenesh1_pm.C_scaffold_10000092	4114	fgenesh1_pm.C_scaffold_10000092	3.49273	11.2568	0.0157853	1.20585e-10	7.76839e-10	up in ∆ypr2		4114	TRIRE2_4114	10	678350	679585	3	379	-	-	-	-	-	-	-	-	-	-	-	FAD linked oxidase	-	-	-	-	-	-	-	-	-	-	-	TRIREDRAFT_4114
jgi|Trire2|62300|e_gw1.10.608.1	62300	e_gw1.10.608.1	1.03055	2.0428	2.36348	1.63512e-05	5.6721e-05	up in ∆ypr2		62300	TRIRE2_62300	10	591715	592463	3	408	-	-	-	-	-	-	-	-	-	-	-	unknown protein	NCU08433	0	0	-	-	-	-	-	-	-	-	TRIREDRAFT_62300
jgi|Trire2|78357|estExt_GeneWisePlus.C_100319	78357	estExt_GeneWisePlus.C_100319	1.03364	2.04718	7.11184	3.83152e-21	4.83216e-20	up in ∆ypr2		78357	TRIRE2_78357	10	588962	588988	3	409	-	-	-	-	-	-	-	-	-	-	-	NADH-quinone oxidoreductase, putative	NCU02948	ncw-4	mig-1	ANID_00297	1148	16464	17611	-	protoplast secreted protein 2	VIII	PF02525.10,TIGR01755,PF03358.8,PF00258.18,PF00258.17	TRIREDRAFT_78357
jgi|Trire2|107775|fgenesh5_pg.C_scaffold_10000165	107775	fgenesh5_pg.C_scaffold_10000165	1.1468	2.21423	5.92454	1.95154e-20	2.37079e-19	up in ∆ypr2		107775	TRIRE2_107775	10	503692	505995	3	435	-	-	-	-	-	-	-	-	-	-	-	unknown protein	NCU05722	0	0	-	-	-	-	-	-	-	-	TRIREDRAFT_107775
jgi|Trire2|122047|estExt_fgenesh5_pg.C_100155	122047	estExt_fgenesh5_pg.C_100155	1.13511	2.19635	3.94086	7.59375e-15	6.82825e-14	up in ∆ypr2	20	122047	TRIRE2_122047	10	477261	477308	3	443	Effector proteins (competition and defense)	0	Tandem repeat proteins	0	Tandem repeats: Trichoderma specific	0	225056	0	\N	cell wall protein	Putative cell wall protein. Ser/Thr-rich.	cell wall protein. Ser/Thr-rich.	-	-	-	-	-	-	-	-	-	-	-	TRIREDRAFT_122047
jgi|Trire2|62475|e_gw1.10.651.1	62475	e_gw1.10.651.1	1.21263	2.3176	0.779297	0.000318723	0.000896904	up in ∆ypr2	20	62475	TRIRE2_62475	10	474525	474700	3	444	-	-	-	-	-	-	-	-	-	-	-	glutathione-dependent formaldehyde-activating	-	-	-	-	-	-	-	-	-	-	-	TRIREDRAFT_62475
jgi|Trire2|62556|e_gw1.10.598.1	62556	e_gw1.10.598.1	2.18159	4.53654	4.6757	5.89935e-54	2.48468e-52	up in ∆ypr2	20	62556	TRIRE2_62556	10	471395	471742	3	445	-	-	-	-	-	-	-	-	-	-	-	unknown protein	-	-	-	-	-	-	-	-	-	-	-	TRIREDRAFT_62556
jgi|Trire2|38527|gw1.10.517.1	38527	gw1.10.517.1	1.0883	2.12624	0.297536	0.00372766	0.00849088	up in ∆ypr2		38527	TRIRE2_38527	10	447077	447448	3	451	-	-	-	-	-	-	-	-	-	-	-	unknown protein, only present in Aspergilli and Gibberella	-	-	-	-	-	-	-	-	-	-	-	TRIREDRAFT_38527
jgi|Trire2|107745|fgenesh5_pg.C_scaffold_10000135	107745	fgenesh5_pg.C_scaffold_10000135	1.39515	2.63015	0.291499	0.000879516	0.00227695	up in ∆ypr2		107745	TRIRE2_107745	10	422188	422341	3	462	-	-	-	-	-	-	-	-	-	-	-	unknown protein	NCU00652	mb-2	0	-	-	-	-	-	-	-	-	TRIREDRAFT_107745
jgi|Trire2|107704|fgenesh5_pg.C_scaffold_10000094	107704	fgenesh5_pg.C_scaffold_10000094	1.20759	2.30952	4.95568	5.40798e-25	8.25434e-24	up in ∆ypr2		107704	TRIRE2_107704	10	270352	270644	3	496	Effector proteins (competition and defense)	0	Proteins with known effector domains	0	IPR008701 Necrosis inducing Peptide	302472	50664	YPR157W	-	-	-	unknown protein of IPR008701 Necrosis inducing Peptide	-	-	-	-	-	-	-	-	-	-	-	TRIREDRAFT_107704
jgi|Trire2|62153|e_gw1.10.84.1	62153	e_gw1.10.84.1	1.65495	3.14913	6.35687	2.34848e-25	3.64688e-24	up in ∆ypr2		62153	TRIRE2_62153	10	244154	244916	3	504	-	-	-	-	-	-	-	-	\N	malate dehydrogenase	\N	malate dehydrogenase	NCU02906	0	0	ANID_06933	1963	53336	55298	-	malate dehydrogenase	I	PF03949.7,PF03949.8,PF00390.12,PF00390.11	TRIREDRAFT_62153
jgi|Trire2|107669|fgenesh5_pg.C_scaffold_10000059	107669	fgenesh5_pg.C_scaffold_10000059	2.0218	4.0609	2.27342	1.08966e-17	1.14466e-16	up in ∆ypr2		107669	TRIRE2_107669	10	179452	180544	3	521	CAZymes	0	Carbohydrate esterase	Carbohydrate esterase family10	0	-	1980	YHR028C	-	-	-	Dipeptidyl aminopeptidase	-	-	-	ANID_09372	1878	413471	415348	-	conserved hypothetical protein	VIII	PF00326.13,PF00326.14,PF07676.5,PF07676.4	TRIREDRAFT_107669
jgi|Trire2|62285|e_gw1.10.412.1	62285	e_gw1.10.412.1	1.08229	2.11739	5.02794	5.42867e-11	3.63363e-10	up in ∆ypr2		62285	TRIRE2_62285	10	151175	151520	3	528	Sulfur metabolism	0	sulfur assimilation	EC number 2.A.53.1.2	sulfate permease(c-conidial,m-mycelial), related to N. crassa CYS-13 and S. cerevisiae Sul1p/Sul2p	41966	193580	YBR294W	-	-	-	Sulfate permease I (CYS-13)	-	-	-	-	-	-	-	-	-	-	-	TRIREDRAFT_62285
jgi|Trire2|121989|estExt_fgenesh5_pg.C_100051	121989	estExt_fgenesh5_pg.C_100051	1.1917	2.28421	6.40324	1.29729e-12	9.93439e-12	up in ∆ypr2		121989	TRIRE2_121989	10	143160	143516	3	529	-	-	-	-	-	-	-	-	\N	oxalate decarboxylase	\N	oxalate decarboxylase	NCU00865	0	0	-	-	-	-	-	-	-	-	TRIREDRAFT_121989
jgi|Trire2|121986|estExt_fgenesh5_pg.C_100048	121986	estExt_fgenesh5_pg.C_100048	1.69254	3.23225	4.13735	1.9302e-19	2.22098e-18	up in ∆ypr2		121986	TRIRE2_121986	10	120335	120807	3	531	-	-	-	-	-	-	-	-	-	-	-	MFS permease	NCU09027	0	0	ANID_07027	1882	176392	178273	-	MFS transporter	IV	PF07690.9,PF07690.8	TRIREDRAFT_121986
jgi|Trire2|60616|e_gw1.8.593.1	60616	e_gw1.8.593.1	1.08739	2.12489	3.68583	1.63071e-10	1.04005e-09	up in ∆ypr2		60616	TRIRE2_60616	8	61873	62418	3	600	-	-	-	-	-	-	-	-	-	-	-	unknown protein	NCU02378	0	0	ANID_03714	2206	517092	519297	+	integral membrane protein	II	PF10348.2,PF10355.1,PF10348.1,PF10355.2	TRIREDRAFT_60616
jgi|Trire2|121534|estExt_fgenesh5_pg.C_80051	121534	estExt_fgenesh5_pg.C_80051	2.36404	5.14808	10.1421	3.74795e-15	3.44295e-14	up in ∆ypr2		121534	TRIRE2_121534	8	104186	104486	3	613	Sexual development	PDC1	Other genes involved in meiosis in yeasts	0	Pyruvate decarboxylase, Decarboxylates pyruvate to acetaldehyde	150078	74222	YLR134W	\N	pyruvate decarboxylase	COG0028, IlvB, Thiamine pyrophosphate-requiring enzymes	pyruvate decarboxylase	NCU02397	ilv-5	0	ANID_04888	2143	110339	112481	-	pyruvate decarboxylase	III	PF00205.14,PF02775.14,PF00205.15,PF02776.10,PF02775.13,PF02776.11	TRIREDRAFT_121534
jgi|Trire2|60849|e_gw1.8.368.1	60849	e_gw1.8.368.1	1.29163	2.44805	3.69716	5.22219e-06	1.96498e-05	up in ∆ypr2		60849	TRIRE2_60849	8	107465	107803	3	614	-	-	-	-	-	-	-	-	-	-	-	FAD-dependent sulfhydryl oxidase Erv1	NCU02396	0	0	ANID_03027	777	635140	635916	-	FAD dependent sulfhydryl oxidase Erv1	VI	PF04777.6,PF04777.5	TRIREDRAFT_60849
jgi|Trire2|106828|fgenesh5_pg.C_scaffold_8000107	106828	fgenesh5_pg.C_scaffold_8000107	1.07935	2.11308	3.61723	2.11901e-10	1.33809e-09	up in ∆ypr2		106828	TRIRE2_106828	8	273048	273413	3	659	-	-	-	-	-	-	-	-	-	-	-	unknown protein	NCU06879	0	0	ANID_02253	494	92771	93264	-	YggU family protein	VII	PF02594.8,PF02594.9	TRIREDRAFT_106828
jgi|Trire2|60791|e_gw1.8.472.1	60791	e_gw1.8.472.1	1.53771	2.90333	1.28838	9.05452e-08	4.31879e-07	up in ∆ypr2		60791	TRIRE2_60791	8	299120	299252	3	669	-	-	-	-	-	-	-	-	-	-	-	subtilisin like protease	-	-	-	-	-	-	-	-	-	-	-	TRIREDRAFT_60791
jgi|Trire2|3719|fgenesh1_pm.C_scaffold_8000086	3719	fgenesh1_pm.C_scaffold_8000086	2.13335	4.38736	3.65335	3.87081e-38	1.03791e-36	up in ∆ypr2		3719	TRIRE2_3719	8	455814	455909	3	720	-	-	-	-	-	-	-	-	-	-	-	Flavonol reductase/cinnamoyl-CoA reductase	NCU06936	0	0	-	-	-	-	-	-	-	-	TRIREDRAFT_3719
jgi|Trire2|61284|e_gw1.8.744.1	61284	e_gw1.8.744.1	1.1309	2.18995	5.99756	3.45398e-27	5.7646e-26	up in ∆ypr2		61284	TRIRE2_61284	8	459332	460051	3	721	-	-	-	-	-	-	-	-	-	-	-	methyltransferase	-	-	-	ANID_02165	1171	103453	104623	+	TAM domain methyltransferase	VII	PF08242.4,PF08241.5,PF08241.4,PF08242.5	TRIREDRAFT_61284
jgi|Trire2|106900|fgenesh5_pg.C_scaffold_8000179	106900	fgenesh5_pg.C_scaffold_8000179	1.45474	2.74108	0.203276	0.00028369	0.00080466	up in ∆ypr2		106900	TRIRE2_106900	8	480418	480738	3	727	-	-	-	-	-	-	-	-	-	-	-	orphan protein	-	-	-	-	-	-	-	-	-	-	-	TRIREDRAFT_106900
jgi|Trire2|35777|gw1.8.477.1	35777	gw1.8.477.1	1.71751	3.28868	7.00012	7.52421e-32	1.56971e-30	up in ∆ypr2		35777	TRIRE2_35777	8	566778	566879	3	748	-	-	-	-	-	-	-	-	-	-	-	K(+)/H(+) antiporter 1	NCU07068	0	0	ANID_01290	2806	310275	313080	+	K+ homeostasis protein Kha1	VIII	PF00999.13,PF00999.14	TRIREDRAFT_35777
jgi|Trire2|22210|estExt_fgenesh1_pm.C_80103	22210	estExt_fgenesh1_pm.C_80103	1.84752	3.59881	5.5794	3.38469e-64	1.88887e-62	up in ∆ypr2		22210	TRIRE2_22210	8	597418	598084	3	755	-	-	-	-	-	-	-	-	-	-	-	Zinc carboxypeptidase	NCU07536	0	0	-	-	-	-	-	-	-	-	TRIREDRAFT_22210
jgi|Trire2|61055|e_gw1.8.221.1	61055	e_gw1.8.221.1	1.1471	2.21468	1.13543	0.000116616	0.000354051	up in ∆ypr2		61055	TRIRE2_61055	8	599405	599725	3	756	-	-	-	-	-	-	-	-	-	-	-	orphan protein	NCU01230	0	0	ANID_04005	1741	133187	134927	+	conserved hypothetical protein	II	0	TRIREDRAFT_61055
jgi|Trire2|60665|e_gw1.8.170.1	60665	e_gw1.8.170.1	1.71298	3.27837	3.19064	3.86998e-22	5.15748e-21	up in ∆ypr2		60665	TRIRE2_60665	8	624466	625854	3	761	Transcription factors	0	Zn2Cys6	0	hypothetical protein	222577	147011	YML099C	-	-	-	Zn2Cys6 transcriptional regulator	NCU00017	0	0	ANID_09050	1617	203722	205338	-	conserved hypothetical protein	VII	PF00172.11,PF00172.10	TRIREDRAFT_60665
jgi|Trire2|61293|e_gw1.8.613.1	61293	e_gw1.8.613.1	1.51701	2.86197	4.69212	1.10663e-29	2.08902e-28	up in ∆ypr2		61293	TRIRE2_61293	8	631170	632549	3	764	CAZymes	0	Carbohydrate esterase	Carbohydrate esterase family10	0	36069	56034	0	-	-	-	dipeptidyl peptidase 5	NCU00761	0	0	ANID_01433	1726	81902	83627	+	triacylglycerol lipase	VII	PF00326.14,PF07859.6,PF00135.21,PF00135.20	TRIREDRAFT_61293
jgi|Trire2|32027|gw1.8.320.1	32027	gw1.8.320.1	1.6728	3.18832	-0.190836	0.000633561	0.00168065	up in ∆ypr2		32027	TRIRE2_32027	8	691395	691776	3	778	CAZymes	0	Carbohydrate esterase	Carbohydrate esterase family10	0	17904	193216	YLR118C	-	-	-	CE10 protein	-	-	-	-	-	-	-	-	-	-	-	TRIREDRAFT_32027
jgi|Trire2|60847|e_gw1.8.384.1	60847	e_gw1.8.384.1	1.3911	2.62279	6.53034	2.54419e-39	7.14372e-38	up in ∆ypr2		60847	TRIRE2_60847	8	781219	781365	3	804	-	-	-	-	-	-	-	-	-	-	-	Mitochondrial F1F0-ATP synthase, subunit c/ATP9/proteolipid	NCU02250	oli	atp-9,prl-1	ANID_01624	913	74653	75565	-	mitochondrial ATP synthase	VII	PF00137.14,PF00137.13	TRIREDRAFT_60847
jgi|Trire2|60810|e_gw1.8.811.1	60810	e_gw1.8.811.1	5.05863	33.3273	6.51894	5.57001e-143	1.55421e-140	up in ∆ypr2		60810	TRIRE2_60810	8	830000	830145	3	816	-	-	-	-	-	-	-	-	-	-	-	unknown protein, GPR1/FUN34/yaaH protein, 6TMs	-	-	-	-	-	-	-	-	-	-	-	TRIREDRAFT_60810
jgi|Trire2|121653|estExt_fgenesh5_pg.C_80277	121653	estExt_fgenesh5_pg.C_80277	4.62898	24.7435	5.90649	1.11335e-207	1.98823e-204	up in ∆ypr2		121653	TRIRE2_121653	8	831341	831624	3	817	-	-	-	-	-	-	-	-	-	-	-	unknown protein	-	-	-	-	-	-	-	-	-	-	-	TRIREDRAFT_121653
jgi|Trire2|107007|fgenesh5_pg.C_scaffold_8000286	107007	fgenesh5_pg.C_scaffold_8000286	3.36853	10.3283	-0.364234	3.08789e-08	1.55422e-07	up in ∆ypr2		107007	TRIRE2_107007	8	849805	850056	3	823	-	-	-	-	-	-	-	-	-	-	-	SSCRP	NCU09525	0	0	ANID_11046	850	196845	197694	+	secreted protein	II	PF09352.2,PF09352.3	TRIREDRAFT_107007
jgi|Trire2|61212|e_gw1.8.604.1	61212	e_gw1.8.604.1	1.59187	3.0144	5.50024	2.92632e-50	1.13113e-48	up in ∆ypr2		61212	TRIRE2_61212	8	881020	881088	3	833	Secondary metabolism	0	Cytochrome P450	p450 superfamily (cI12078)	0	0	0	0	-	-	-	cytochrome P450 monooxygenase	NCU06895	0	0	ANID_09007	1742	91444	93185	-	benzoate 4-monooxygenase cytochrome P450	VII	PF00067.14,PF00067.15	TRIREDRAFT_61212
jgi|Trire2|107032|fgenesh5_pg.C_scaffold_8000311	107032	fgenesh5_pg.C_scaffold_8000311	2.27389	4.83625	2.19977	1.24277e-21	1.61524e-20	up in ∆ypr2		107032	TRIRE2_107032	8	910508	911221	3	845	-	-	-	-	-	-	-	-	-	-	-	unknown protein	-	-	-	-	-	-	-	-	-	-	-	TRIREDRAFT_107032
jgi|Trire2|77647|estExt_GeneWisePlus.C_80615	77647	estExt_GeneWisePlus.C_80615	2.03944	4.11087	3.61463	4.94725e-26	7.9307e-25	up in ∆ypr2		77647	TRIRE2_77647	8	943543	944619	3	858	-	-	-	-	-	-	-	-	-	-	-	threonine aldolase	-	-	-	-	-	-	-	-	-	-	-	TRIREDRAFT_77647
jgi|Trire2|77699|estExt_GeneWisePlus.C_80711	77699	estExt_GeneWisePlus.C_80711	1.41298	2.66286	7.33791	1.212e-14	1.07788e-13	up in ∆ypr2		77699	TRIRE2_77699	8	1128987	1130030	3	907	-	-	-	-	-	-	-	-	-	-	-	unknown protein	NCU05525	0	0	ANID_06058	1199	65208	66406	-	DUF833 domain-containing protein	I	PF05742.4,PF05742.5	TRIREDRAFT_77699
jgi|Trire2|60758|e_gw1.8.748.1	60758	e_gw1.8.748.1	1.3375	2.52714	3.61447	5.69168e-14	4.79896e-13	up in ∆ypr2		60758	TRIRE2_60758	8	1217606	1217780	3	928	-	-	-	-	-	-	-	-	-	-	-	SAM-dependent methyltransferase	-	-	-	-	-	-	-	-	-	-	-	TRIREDRAFT_60758
jgi|Trire2|61127|e_gw1.8.603.1	61127	e_gw1.8.603.1	1.46321	2.75721	4.96687	8.81401e-31	1.76063e-29	up in ∆ypr2		61127	TRIRE2_61127	8	1234574	1235076	3	932	-	-	-	-	-	-	-	-	-	-	-	Serine carboxypeptidase	-	-	-	-	-	-	-	-	-	-	-	TRIREDRAFT_61127
jgi|Trire2|61078|e_gw1.8.409.1	61078	e_gw1.8.409.1	1.6769	3.1974	5.49647	1.31175e-54	5.63108e-53	up in ∆ypr2		61078	TRIRE2_61078	8	1330240	1330368	3	956	-	-	-	-	-	-	-	-	-	-	-	esterase/ lipase	-	-	-	ANID_06005	458	121780	122237	-	conserved hypothetical protein	I	0	TRIREDRAFT_61078
jgi|Trire2|107172|fgenesh5_pg.C_scaffold_8000451	107172	fgenesh5_pg.C_scaffold_8000451	1.16885	2.24833	0.933841	0.000351774	0.00098248	up in ∆ypr2		107172	TRIRE2_107172	8	1336705	1338111	3	958	-	-	-	-	-	-	-	-	\N	4-aminobutyrate aminotransferase-like protein	COG0160, GabT, 4-aminobutyrate aminotransferase and related aminotransferases	2,2-dialkylglycine decarboxylase, AIB forming ?	NCU07623	0	0	ANID_07656	1359	157625	158983	+	2,2-dialkylglycine decarboxylase	IV	PF00202.13,PF00202.14	TRIREDRAFT_107172
jgi|Trire2|60931|e_gw1.8.504.1	60931	e_gw1.8.504.1	1.0139	2.01936	2.17408	7.66188e-06	2.80841e-05	up in ∆ypr2		60931	TRIRE2_60931	8	1338556	1339399	3	959	Transcription factors	0	Zn2Cys6	0	conserved hypothetical protein	309446	63931	YIR023W	\N	N-terminal binuclear Zn cluster-containing/DNA binding domain-containing protein	\N	Zn2Cys6 transcriptional regulator	-	-	-	ANID_10979	1996	155072	157067	-	conserved hypothetical protein	IV	PF04082.10,PF04082.11	TRIREDRAFT_60931
jgi|Trire2|124115|estExt_fgenesh5_pg.C_340036	124115	estExt_fgenesh5_pg.C_340036	3.09005	8.51528	8.20572	1.47871e-71	1.00026e-69	up in ∆ypr2		124115	TRIRE2_124115	34	119104	120447	3	990	-	-	-	-	-	-	-	-	\N	phosphoenolpyruvate carboxykinase	phosphoenolpyruvate carboxykinase (ATP), aligns to Emericella nidulans AcuF protein (gi15983749)	phosphoenolpyruvate carboxykinase AcuF	NCU09873	acu-6	con-3,pck-1	ANID_01918	2687	333663	336349	-	phosphoenolpyruvate carboxykinase AcuF	VII	PF01293.12,PF01293.13,TIGR00224	TRIREDRAFT_124115
jgi|Trire2|124097|estExt_fgenesh5_pg.C_340008	124097	estExt_fgenesh5_pg.C_340008	1.50976	2.84762	5.34698	2.38814e-20	2.8777e-19	up in ∆ypr2		124097	TRIRE2_124097	34	30576	31544	3	1014	-	-	-	-	-	-	-	-	\N	Phenazine biosynthesis PhzC/PhzF protein	\N	phenazine biosynthesis protein phzF	NCU11356	0	0	ANID_07010	1164	111973	113136	+	conserved hypothetical protein	IV	PF02567.8,PF02567.9,TIGR00654	TRIREDRAFT_124097
jgi|Trire2|81586|estExt_GeneWisePlus.C_260018	81586	estExt_GeneWisePlus.C_260018	2.10033	4.28806	3.25687	4.31614e-17	4.39439e-16	up in ∆ypr2		81586	TRIRE2_81586	26	39999	40520	3	1029	-	-	-	-	-	-	-	-	-	-	-	unknown protein	NCU11291	0	0	ANID_06423	719	116664	117382	+	conserved hypothetical protein	I	PF09351.3,PF09351.2	TRIREDRAFT_81586
jgi|Trire2|111362|fgenesh5_pg.C_scaffold_26000050	111362	fgenesh5_pg.C_scaffold_26000050	3.32861	10.0464	4.8529	1.32775e-106	1.79629e-104	up in ∆ypr2		111362	TRIRE2_111362	26	154941	155076	3	1062	-	-	-	-	-	-	-	-	-	-	-	unknown protein	-	-	-	-	-	-	-	-	-	-	-	TRIREDRAFT_111362
jgi|Trire2|123777|estExt_fgenesh5_pg.C_260071	123777	estExt_fgenesh5_pg.C_260071	2.45906	5.49857	5.57522	2.16625e-83	1.93424e-81	up in ∆ypr2		123777	TRIRE2_123777	26	208911	209234	3	1078	-	-	-	-	-	-	-	-	-	-	-	orphan protein	-	-	-	-	-	-	-	-	-	-	-	TRIREDRAFT_123777
jgi|Trire2|81659|estExt_GeneWisePlus.C_260138	81659	estExt_GeneWisePlus.C_260138	2.82081	7.06557	4.63234	8.30877e-83	7.34545e-81	up in ∆ypr2		81659	TRIRE2_81659	26	266541	267355	3	1089	-	-	-	-	-	-	-	-	-	-	-	unknown protein	NCU07349	0	0	ANID_03024	1527	627884	629410	-	conserved hypothetical protein	VI	0	TRIREDRAFT_81659
jgi|Trire2|5612|fgenesh1_pm.C_scaffold_26000042	5612	fgenesh1_pm.C_scaffold_26000042	1.17289	2.25464	3.01976	1.74852e-10	1.11359e-09	up in ∆ypr2		5612	TRIRE2_5612	26	274586	274745	3	1093	-	-	-	-	-	-	-	-	-	-	-	MFS permease	-	-	-	ANID_06934	1891	55644	57534	-	MFS transporter	I	PF07690.9,PF07690.8	TRIREDRAFT_5612
jgi|Trire2|81668|estExt_GeneWisePlus.C_260199	81668	estExt_GeneWisePlus.C_260199	1.41606	2.66855	0.959656	1.27827e-05	4.52207e-05	up in ∆ypr2		81668	TRIRE2_81668	26	346984	348594	3	1099	-	-	-	-	-	-	-	-	-	-	-	unknown protein	-	-	-	-	-	-	-	-	-	-	-	TRIREDRAFT_81668
jgi|Trire2|34252|gw1.26.102.1	34252	gw1.26.102.1	1.13383	2.19441	3.25595	4.35335e-11	2.94701e-10	up in ∆ypr2		34252	TRIRE2_34252	26	384634	384836	3	1109	-	-	-	-	-	-	-	-	-	-	-	unknown protein	-	-	-	ANID_05401	561	60638	61198	-	conserved hypothetical protein	V	PF11338.1	TRIREDRAFT_34252
jgi|Trire2|81690|estExt_GeneWisePlus.C_260242	81690	estExt_GeneWisePlus.C_260242	1.17288	2.25462	6.55542	2.27976e-11	1.58536e-10	up in ∆ypr2		81690	TRIRE2_81690	26	422136	422987	3	1121	-	-	-	-	-	-	-	-	\N	beta-arrestin protein	hypothetical beta-arrestin protein, shares similarity with Aspergillus idulans CreD, possible inhibitor of G-protein coupled receptors	߀-arrestin protein, shares similarity with Aspergillus idulans CreD, possible inhibitor of G-protein coupled receptors	NCU03887	0	0	ANID_04170	2416	247018	249433	+	carbon catabolite repression protein CreD	II	PF02752.14,PF02752.15,PF00339.21,PF00339.22	TRIREDRAFT_81690
jgi|Trire2|49898|estExt_Genewise1.C_140432	49898	estExt_Genewise1.C_140432	2.02192	4.06125	6.63838	8.7493e-59	4.17767e-57	up in ∆ypr2		49898	TRIRE2_49898	14	721568	721879	3	1158	-	-	-	-	-	-	-	-	-	-	-	glucosamine-6-phosphate isomerase	NCU04727	0	0	ANID_01418	1546	40690	42235	+	glucosamine-6-phosphate isomerase	VII	PF01182.12,PF01182.13,TIGR00502	TRIREDRAFT_49898
jgi|Trire2|79671|estExt_GeneWisePlus.C_140421	79671	estExt_GeneWisePlus.C_140421	2.60508	6.08424	6.52238	3.92252e-70	2.57531e-68	up in ∆ypr2		79671	TRIRE2_79671	14	714554	714937	3	1160	CAZymes	0	Carbohydrate esterase	Carbohydrate esterase family9	0	79361	89342	0	\N	Carbohydrate Esterase Family 9	candidate N-acetyl-glucosamine-6-phosphate deacetylase	N-acetyl-glucosamine-6-phosphate deacetylase	NCU04725	0	0	ANID_01428	1293	71217	72509	+	n-acetylglucosamine-6-phosphate deacetylase	VII	PF01979.13,TIGR00221,PF01979.12	TRIREDRAFT_79671
jgi|Trire2|109146|fgenesh5_pg.C_scaffold_14000220	109146	fgenesh5_pg.C_scaffold_14000220	2.65685	6.30654	-1.6151	0.00342245	0.00786793	up in ∆ypr2		109146	TRIRE2_109146	14	697198	697687	3	1165	Heterotrimeric G-protein pathway	0	GPCRs	7-TM receptor	PTH11-like	319558	200188	0	-	-	-	PTH11 GPCR	-	-	-	-	-	-	-	-	-	-	-	TRIREDRAFT_109146
jgi|Trire2|4682|fgenesh1_pm.C_scaffold_14000093	4682	fgenesh1_pm.C_scaffold_14000093	1.23044	2.34639	6.0491	5.81801e-33	1.27326e-31	up in ∆ypr2		4682	TRIRE2_4682	14	616905	617702	3	1189	-	-	-	-	-	-	-	-	-	-	-	short chain dehydrogenase/reductase	-	-	-	ANID_07128	828	135782	136609	-	conserved hypothetical protein	IV	PF00106.17,PF00106.18	TRIREDRAFT_4682
jgi|Trire2|64667|e_gw1.14.513.1	64667	e_gw1.14.513.1	1.13428	2.19508	4.54268	2.24086e-11	1.55952e-10	up in ∆ypr2		64667	TRIRE2_64667	14	599398	599519	3	1194	-	-	-	-	-	-	-	-	-	-	-	unknown protein	-	-	-	-	-	-	-	-	-	-	-	TRIREDRAFT_64667
jgi|Trire2|39606|gw1.14.443.1	39606	gw1.14.443.1	1.11155	2.16078	2.29045	4.28696e-07	1.8636e-06	up in ∆ypr2		39606	TRIRE2_39606	14	458039	458818	3	1231	-	-	-	-	-	-	-	-	-	-	-	unknown protein	NCU02613	0	0	ANID_03818	1047	855771	856817	+	conserved hypothetical protein	II	0	TRIREDRAFT_39606
jgi|Trire2|49753|estExt_Genewise1.C_140195	49753	estExt_Genewise1.C_140195	1.71859	3.29115	5.19131	2.07125e-49	7.83651e-48	up in ∆ypr2		49753	TRIRE2_49753	14	340083	341016	3	1264	-	-	-	-	-	-	-	-	lad1	L-arabinitol 4-dehydrogenase	\N	L-arabinitol 4-dehydrogenase	NCU00643	0	0	ANID_00942	1487	228959	230445	-	xylitol dehydrogenase XdhB	VIII	PF00107.18,PF00107.19,PF08240.5,PF08240.4	TRIREDRAFT_49753
jgi|Trire2|4626|fgenesh1_pm.C_scaffold_14000037	4626	fgenesh1_pm.C_scaffold_14000037	1.59618	3.02341	7.30979	2.26587e-39	6.40252e-38	up in ∆ypr2		4626	TRIRE2_4626	14	243487	246636	3	1284	-	-	-	-	-	-	-	-	-	-	-	unknown protein, C2 domain	NCU08064	0	0	-	-	-	-	-	-	-	-	TRIREDRAFT_4626
jgi|Trire2|64672|e_gw1.14.496.1	64672	e_gw1.14.496.1	1.51258	2.8532	2.4216	3.19473e-08	1.60528e-07	up in ∆ypr2		64672	TRIRE2_64672	14	127378	128064	3	1317	Genome integrity	Ada1	0	0	Bifunctional transcriptional activator/DNA repair enzyme Ada	323331	138325	0	-	-	-	Helix-turn-helix, AraC type	-	-	-	ANID_02276	681	72023	72703	+	DNA repair and transcription factor Ada	VII	PF02805.8,PF02805.9,PF00165.16,PF00165.15	TRIREDRAFT_64672
jgi|Trire2|41590|gw1.14.482.1	41590	gw1.14.482.1	1.77618	3.42518	3.69734	1.50221e-23	2.12908e-22	up in ∆ypr2		41590	TRIRE2_41590	14	125739	126476	3	1318	-	-	-	-	-	-	-	-	-	-	-	iron transporter	NCU11307	0	0	ANID_03681	1058	425955	427012	+	calcium transporter	II	PF01988.12,PF01988.11	TRIREDRAFT_41590
jgi|Trire2|123572|estExt_fgenesh5_pg.C_230126	123572	estExt_fgenesh5_pg.C_230126	2.79024	6.91747	4.54565	4.05706e-62	2.11845e-60	up in ∆ypr2		123572	TRIRE2_123572	23	427024	427098	3	1375	-	-	-	-	-	-	-	-	-	-	-	Phospholipase A2	NCU07476	0	0	-	-	-	-	-	-	-	-	TRIREDRAFT_123572
jgi|Trire2|81260|estExt_GeneWisePlus.C_230209	81260	estExt_GeneWisePlus.C_230209	1.42139	2.67844	7.82655	2.38344e-30	4.64668e-29	up in ∆ypr2		81260	TRIRE2_81260	23	377567	377723	3	1394	-	-	-	-	-	-	-	-	-	-	-	adenylate kinase	NCU03216	0	0	ANID_00259	1352	343419	344770	-	adenylate kinase 2	VIII	PF05191.7,PF00406.15,PF05191.6,PF00406.14,TIGR01351	TRIREDRAFT_81260
jgi|Trire2|123550|estExt_fgenesh5_pg.C_230087	123550	estExt_fgenesh5_pg.C_230087	1.85951	3.62885	5.59382	1.80395e-66	1.06672e-64	up in ∆ypr2		123550	TRIRE2_123550	23	294975	296001	3	1414	-	-	-	-	-	-	-	-	-	-	-	Indoleamine 2,3-dioxygenase-like protein	NCU01402	0	0	ANID_09108	1712	160909	162620	+	indoleamine 2,3-dioxygenase	IV	PF01231.11	TRIREDRAFT_123550
jgi|Trire2|51415|estExt_Genewise1.C_230092	51415	estExt_Genewise1.C_230092	2.70284	6.51082	6.36457	5.76509e-86	5.47622e-84	up in ∆ypr2		51415	TRIRE2_51415	23	140852	140948	3	1450	-	-	-	-	-	-	-	-	-	-	-	unknown protein	NCU04605	0	0	-	-	-	-	-	-	-	-	TRIREDRAFT_51415
jgi|Trire2|110901|fgenesh5_pg.C_scaffold_23000039	110901	fgenesh5_pg.C_scaffold_23000039	2.41232	5.32328	0.927554	9.87638e-12	7.07754e-11	up in ∆ypr2		110901	TRIRE2_110901	23	103358	103382	3	1462	Transcription factors	0	Fungal-trans	0	hypothetical protein	288385	219306	0	\N	fungal specific transcription factor domain-containing protein	This domain is found in a number of fungal transcription factors including transcriptional activator xlnR, yeast regulatory protein GAL4, and other transcription proteins regulating a variety of cellular and metabolic processes	Zn2Cys6 transcriptional regulator	-	-	-	-	-	-	-	-	-	-	-	TRIREDRAFT_110901
jgi|Trire2|27706|gw1.23.39.1	27706	gw1.23.39.1	1.26671	2.40612	2.59383	8.65863e-09	4.62674e-08	up in ∆ypr2		27706	TRIRE2_27706	23	100097	100189	3	1463	Secondary metabolism	0	Cytochrome P450	p450 superfamily (cI12078)	0	0	0	0	-	-	-	Cytochrome P450 CYP2 subfamily	-	-	-	-	-	-	-	-	-	-	-	TRIREDRAFT_27706
jgi|Trire2|110891|fgenesh5_pg.C_scaffold_23000029	110891	fgenesh5_pg.C_scaffold_23000029	2.64515	6.25559	0.320302	4.78064e-10	2.90977e-09	up in ∆ypr2		110891	TRIRE2_110891	23	72813	73400	3	1472	-	-	-	-	-	-	-	-	-	-	-	orphan protein	-	-	-	-	-	-	-	-	-	-	-	TRIREDRAFT_110891
jgi|Trire2|110879|fgenesh5_pg.C_scaffold_23000017	110879	fgenesh5_pg.C_scaffold_23000017	1.63051	3.09622	8.74201	7.63542e-07	3.2174e-06	up in ∆ypr2		110879	TRIRE2_110879	23	44654	44838	3	1484	-	-	-	-	-	-	-	-	-	-	-	unknown protein	-	-	-	-	-	-	-	-	-	-	-	TRIREDRAFT_110879
jgi|Trire2|67964|e_gw1.23.43.1	67964	e_gw1.23.43.1	3.20586	9.22702	6.57706	1.13933e-94	1.28773e-92	up in ∆ypr2		67964	TRIRE2_67964	23	34867	34992	3	1487	Secondary metabolism	0	Cytochrome P450	p450 superfamily (cI12078)	0	0	0	0	-	-	-	Cytochrome P450 CYP2 subfamily	NCU00987	0	0	ANID_09296	1836	181278	183113	+	pisatin demethylase	VIII	PF00067.14,PF00067.15	TRIREDRAFT_67964
jgi|Trire2|81136|estExt_GeneWisePlus.C_230018	81136	estExt_GeneWisePlus.C_230018	1.74227	3.34561	8.24727	5.60053e-45	1.86594e-43	up in ∆ypr2		81136	TRIRE2_81136	23	30722	30771	3	1489	-	-	-	-	-	-	-	-	-	-	-	serine/threonine phosphatase 2 C, PTC2	NCU06660	0	0	ANID_11705	849	817172	818020	-	stress response RCI peptide	VI	PF01679.10,PF01679.9	TRIREDRAFT_81136
jgi|Trire2|123510|estExt_fgenesh5_pg.C_230008	123510	estExt_fgenesh5_pg.C_230008	1.71732	3.28825	3.41102	5.69551e-21	7.11261e-20	up in ∆ypr2		123510	TRIRE2_123510	23	16344	17054	3	1492	Transcription factors	0	Zn2Cys6	0	conserved hypothetical protein	0	0	YMR280C	\N	N-terminal fungal transcription regulatory domain-containing protein	The N-terminal region of a number of fungal transcriptional regulatory proteins contains a Cys-rich motif that is involved in zinc-dependent binding of DNA. The region forms a binuclear Zn cluster, in which two Zn atoms are bound by six Cys residues	Zn2Cys6 transcriptional regulator	-	-	-	-	-	-	-	-	-	-	-	TRIREDRAFT_123510
jgi|Trire2|110868|fgenesh5_pg.C_scaffold_23000006	110868	fgenesh5_pg.C_scaffold_23000006	6.10982	69.0621	-1.61329	4.16206e-05	0.000135681	up in ∆ypr2		110868	TRIRE2_110868	23	13688	13744	3	1494	-	-	-	-	-	-	-	-	-	-	-	unknown protein	-	-	-	-	-	-	-	-	-	-	-	TRIREDRAFT_110868
jgi|Trire2|82662|estExt_GeneWisePlus.C_540005	82662	estExt_GeneWisePlus.C_540005	3.13027	8.75598	5.06991	3.2731e-29	6.06339e-28	up in ∆ypr2		82662	TRIRE2_82662	54	7178	7533	3	1503	Asexual development	ccg-14	Orthologues of Neurospora crassa ccg genes involved in asexual reproduction	0	Epl1 protein	302952	110852	0	\N	\N	hypothetical protein bearing a cerato-platanin domain, related to N. crassa SnodProt1 and T. atroviride epr1 which is constitutively expressed and involved in induction of systemic resistence in plants	unknown protein related to CCG14	NCU07787	ccg-14	0	ANID_06273	620	112351	112970	+	conserved hypothetical protein	I	PF07249.4,PF07249.5	TRIREDRAFT_82662
jgi|Trire2|112665|fgenesh5_pg.C_scaffold_54000004	112665	fgenesh5_pg.C_scaffold_54000004	1.34809	2.54574	1.82511	4.38406e-08	2.16512e-07	up in ∆ypr2		112665	TRIRE2_112665	54	10983	11606	3	1504	-	-	-	-	-	-	-	-	-	-	-	GCN5-related N-acetyltransferase	-	-	-	-	-	-	-	-	-	-	-	TRIREDRAFT_112665
jgi|Trire2|5971|fgenesh1_pm.C_scaffold_36000027	5971	fgenesh1_pm.C_scaffold_36000027	1.46331	2.7574	-0.341628	0.00258149	0.00609954	up in ∆ypr2	21	5971	TRIRE2_5971	36	131300	132220	3	1513	-	-	-	-	-	-	-	-	-	-	-	unknown protein	-	-	-	-	-	-	-	-	-	-	-	TRIREDRAFT_5971
jgi|Trire2|112319|fgenesh5_pg.C_scaffold_36000050	112319	fgenesh5_pg.C_scaffold_36000050	1.33717	2.52655	2.22815	5.3135e-09	2.90712e-08	up in ∆ypr2	21	112319	TRIRE2_112319	36	127866	129751	3	1514	-	-	-	-	-	-	-	-	-	-	-	HET domain protein	-	-	-	-	-	-	-	-	-	-	-	TRIREDRAFT_112319
jgi|Trire2|5970|fgenesh1_pm.C_scaffold_36000026	5970	fgenesh1_pm.C_scaffold_36000026	1.55926	2.94703	4.4827	1.58427e-21	2.04717e-20	up in ∆ypr2	21	5970	TRIRE2_5970	36	124470	125254	3	1515	-	-	-	-	-	-	-	-	-	-	-	Amidase	-	-	-	-	-	-	-	-	-	-	-	TRIREDRAFT_5970
jgi|Trire2|82374|estExt_GeneWisePlus.C_360044	82374	estExt_GeneWisePlus.C_360044	1.52345	2.87478	8.10665	3.49439e-34	8.04161e-33	up in ∆ypr2		82374	TRIRE2_82374	36	72022	72156	3	1530	-	-	-	-	-	-	-	-	-	-	-	unknown protein	NCU08949	0	0	ANID_04299	755	7187	7941	+	conserved hypothetical protein	III	PF08570.3,PF08570.2	TRIREDRAFT_82374
jgi|Trire2|112281|fgenesh5_pg.C_scaffold_36000012	112281	fgenesh5_pg.C_scaffold_36000012	3.7899	13.8317	0.495006	7.40943e-16	7.03069e-15	up in ∆ypr2		112281	TRIRE2_112281	36	35409	36813	3	1544	-	-	-	-	-	-	-	-	-	-	-	orphan protein	-	-	-	-	-	-	-	-	-	-	-	TRIREDRAFT_112281
jgi|Trire2|70491|e_gw1.36.70.1	70491	e_gw1.36.70.1	4.32639	20.062	3.63903	5.10934e-88	5.24383e-86	up in ∆ypr2		70491	TRIRE2_70491	36	33706	34662	3	1545	-	-	-	-	-	-	-	-	-	-	-	esterase/lipase	-	-	-	-	-	-	-	-	-	-	-	TRIREDRAFT_70491
jgi|Trire2|112275|fgenesh5_pg.C_scaffold_36000006	112275	fgenesh5_pg.C_scaffold_36000006	1.24502	2.37022	0.509754	0.00135863	0.00340001	up in ∆ypr2		112275	TRIRE2_112275	36	15734	16093	3	1549	-	-	-	-	-	-	-	-	-	-	-	orphan protein	-	-	-	-	-	-	-	-	-	-	-	TRIREDRAFT_112275
jgi|Trire2|70414|e_gw1.36.13.1	70414	e_gw1.36.13.1	1.15073	2.22026	2.25364	1.8244e-07	8.31127e-07	up in ∆ypr2		70414	TRIRE2_70414	36	9989	10045	3	1551	Transcription factors	0	Zn2Cys6	0	predicted protein	155848	143736	YLR278C	-	-	-	Zn2Cys6 transcriptional regulator	-	-	-	-	-	-	-	-	-	-	-	TRIREDRAFT_70414
jgi|Trire2|23292|estExt_fgenesh1_pm.C_270069	23292	estExt_fgenesh1_pm.C_270069	2.44477	5.44438	6.53607	2.33046e-87	2.31207e-85	up in ∆ypr2		23292	TRIRE2_23292	27	428043	428927	3	1554	-	-	-	-	-	-	-	-	-	-	-	Zinc-binding oxidoreductase	-	-	-	-	-	-	-	-	-	-	-	TRIREDRAFT_23292
jgi|Trire2|111570|fgenesh5_pg.C_scaffold_27000141	111570	fgenesh5_pg.C_scaffold_27000141	1.55794	2.94433	3.52741	5.92055e-20	7.00193e-19	up in ∆ypr2		111570	TRIRE2_111570	27	386393	386453	3	1570	-	-	-	-	-	-	-	-	-	-	-	short chain dehydrogenase/reductase	-	-	-	-	-	-	-	-	-	-	-	TRIREDRAFT_111570
jgi|Trire2|111567|fgenesh5_pg.C_scaffold_27000138	111567	fgenesh5_pg.C_scaffold_27000138	1.64363	3.12451	5.34916	2.32837e-49	8.77215e-48	up in ∆ypr2		111567	TRIRE2_111567	27	378110	378516	3	1572	-	-	-	-	-	-	-	-	-	-	-	C2H2 transcription factor	-	-	-	-	-	-	-	-	-	-	-	TRIREDRAFT_111567
jgi|Trire2|111527|fgenesh5_pg.C_scaffold_27000098	111527	fgenesh5_pg.C_scaffold_27000098	1.261	2.39663	4.06548	1.58674e-16	1.55864e-15	up in ∆ypr2		111527	TRIRE2_111527	27	235387	235831	3	1606	-	-	-	-	-	-	-	-	-	-	-	orphan protein	-	-	-	-	-	-	-	-	-	-	-	TRIREDRAFT_111527
jgi|Trire2|111517|fgenesh5_pg.C_scaffold_27000088	111517	fgenesh5_pg.C_scaffold_27000088	2.00612	4.01701	-0.0558564	1.89462e-05	6.48655e-05	up in ∆ypr2	22	111517	TRIRE2_111517	27	213390	213608	3	1613	-	-	-	-	-	-	-	-	-	-	-	orphan protein	-	-	-	-	-	-	-	-	-	-	-	TRIREDRAFT_111517
jgi|Trire2|111515|fgenesh5_pg.C_scaffold_27000086	111515	fgenesh5_pg.C_scaffold_27000086	3.2489	9.50641	2.05471	8.63121e-23	1.19485e-21	up in ∆ypr2	22	111515	TRIRE2_111515	27	207908	208200	3	1615	Transcription factors	0	Zn2Cys6	0	fungal specific transcription factor, putative	323033	219505	YJL206C	\N	fungal specific transcription factor domain-containing protein	This domain is found in a number of fungal transcription factors including transcriptional activator xlnR, yeast regulatory protein GAL4, and other transcription proteins regulating a variety of cellular and metabolic processes.	Zn2Cys6 transcriptional regulator	-	-	-	-	-	-	-	-	-	-	-	TRIREDRAFT_111515
jgi|Trire2|111514|fgenesh5_pg.C_scaffold_27000085	111514	fgenesh5_pg.C_scaffold_27000085	2.26359	4.80185	-0.385214	2.37697e-05	8.03634e-05	up in ∆ypr2	22	111514	TRIRE2_111514	27	205802	205885	3	1616	-	-	-	-	-	-	-	-	-	-	-	unknown protein, 1TM	NCU05647	0	0	ANID_03295	948	63160	64107	+	conserved hypothetical protein	VI	0	TRIREDRAFT_111514
jgi|Trire2|68973|e_gw1.27.187.1	68973	e_gw1.27.187.1	1.68182	3.20832	0.855596	8.7683e-07	3.6688e-06	up in ∆ypr2	22	68973	TRIRE2_68973	27	202989	204500	3	1617	-	-	-	-	-	-	-	-	-	-	-	acid phosphatase with metalloesterase domain	NCU09649	0	0	-	-	-	-	-	-	-	-	TRIREDRAFT_68973
jgi|Trire2|68925|e_gw1.27.55.1	68925	e_gw1.27.55.1	2.48422	5.59532	-0.765899	0.000243645	0.000699743	up in ∆ypr2		68925	TRIRE2_68925	27	182354	183726	3	1624	-	-	-	-	-	-	-	-	-	-	-	MFS permease	NCU05207	0	0	-	-	-	-	-	-	-	-	TRIREDRAFT_68925
jgi|Trire2|5647|fgenesh1_pm.C_scaffold_27000025	5647	fgenesh1_pm.C_scaffold_27000025	2.83536	7.13721	0.694907	6.75815e-13	5.27018e-12	up in ∆ypr2		5647	TRIRE2_5647	27	154283	154504	3	1637	Heterotrimeric G-protein pathway	0	GPCRs	7-TM receptor	PTH11-like	85568	0	0	\N	GPCR, PTH11-type	hypothetical GPCR, PTH11-type	PTH11 GPCR	-	-	-	ANID_07232	1269	84774	86042	-	conserved hypothetical protein	IV	0	TRIREDRAFT_5647
jgi|Trire2|69066|e_gw1.27.112.1	69066	e_gw1.27.112.1	2.98782	7.93276	1.33652	6.8346e-19	7.63782e-18	up in ∆ypr2		69066	TRIRE2_69066	27	150522	150698	3	1638	-	-	-	-	-	-	-	-	-	-	-	alpha/beta hydrolase	-	-	-	ANID_07233	1036	87832	88867	+	alpha/beta hydrolase	IV	PF00561.13,PF00561.12	TRIREDRAFT_69066
jgi|Trire2|123820|estExt_fgenesh5_pg.C_270052	123820	estExt_fgenesh5_pg.C_270052	1.2952	2.45412	6.61124	1.1588e-35	2.87415e-34	up in ∆ypr2		123820	TRIRE2_123820	27	133740	134798	3	1645	-	-	-	-	-	-	-	-	\N	Branched chain aminotransferase	cd01557, BCAT_beta_family	BCAT_beta_family	NCU04292	0	0	ANID_05957	1400	190469	191868	+	branched-chain amino acid aminotransferase	I	PF01063.12,PF01063.11,TIGR01123	TRIREDRAFT_123820
jgi|Trire2|42848|gw1.27.266.1	42848	gw1.27.266.1	2.4171	5.34096	7.05643	2.04934e-61	1.05164e-59	up in ∆ypr2		42848	TRIRE2_42848	27	83280	83753	3	1659	-	-	-	-	-	-	-	-	-	-	-	unknown protein	-	-	-	-	-	-	-	-	-	-	-	TRIREDRAFT_42848
jgi|Trire2|111446|fgenesh5_pg.C_scaffold_27000017	111446	fgenesh5_pg.C_scaffold_27000017	1.59431	3.01949	4.37677	9.02735e-23	1.24583e-21	up in ∆ypr2	23	111446	TRIRE2_111446	27	41968	42116	3	1673	Transcription factors	0	Zn2Cys6	0	predicted protein	231261	113817	YJL206C	-	-	-	Zn2Cys6 transcriptional regulator	-	-	-	-	-	-	-	-	-	-	-	TRIREDRAFT_111446
jgi|Trire2|123806|estExt_fgenesh5_pg.C_270016	123806	estExt_fgenesh5_pg.C_270016	2.40021	5.2788	4.90312	1.15634e-70	7.64815e-69	up in ∆ypr2	23	123806	TRIRE2_123806	27	39527	39786	3	1674	Heterotrimeric G-protein pathway	Gpr1	GPCRs	7-TM receptor	V (cAMP receptor-like, Dicty_CAR domain)	160995	33049	0	\N	G-protein coupled receptor protein	hypothetical G-protein coupled receptor protein, family 2, secretin like, possibly involved in signal transduction	GPCR, secretin like	-	-	-	-	-	-	-	-	-	-	-	TRIREDRAFT_123806
jgi|Trire2|111443|fgenesh5_pg.C_scaffold_27000014	111443	fgenesh5_pg.C_scaffold_27000014	4.00095	16.0106	1.2149	6.72629e-25	1.01968e-23	up in ∆ypr2	23	111443	TRIRE2_111443	27	35547	35807	3	1676	-	-	-	-	-	-	-	-	-	-	-	orphan protein	-	-	-	-	-	-	-	-	-	-	-	TRIREDRAFT_111443
jgi|Trire2|111442|fgenesh5_pg.C_scaffold_27000013	111442	fgenesh5_pg.C_scaffold_27000013	1.64464	3.12671	2.28169	7.20165e-08	3.47399e-07	up in ∆ypr2	23	111442	TRIRE2_111442	27	30118	30786	3	1677	-	-	-	-	-	-	-	-	-	-	-	Epl1/Sm1	-	-	-	-	-	-	-	-	-	-	-	TRIREDRAFT_111442
jgi|Trire2|111716|fgenesh5_pg.C_scaffold_28000129	111716	fgenesh5_pg.C_scaffold_28000129	5.25505	38.1881	1.29904	1.9541e-32	4.16424e-31	up in ∆ypr2		111716	TRIRE2_111716	28	372406	373419	3	1692	-	-	-	-	-	-	-	-	-	-	-	Flavonol reductase/cinnamoyl-CoA reductase	-	-	-	ANID_00765	1093	117065	118157	-	3-beta hydroxysteroid dehydrogenase/isomerase	VIII	PF07993.5,PF05368.6,PF00106.18,PF01073.12,PF01370.14	TRIREDRAFT_111716
jgi|Trire2|69245|e_gw1.28.19.1	69245	e_gw1.28.19.1	1.04642	2.0654	4.81772	8.00539e-16	7.58008e-15	up in ∆ypr2		69245	TRIRE2_69245	28	386646	388360	3	1698	CAZymes	0	Glycoside hydrolase	Glycoside hydrolase family2	candidate b-mannosidase	36554	33307	0	\N	Glycoside Hydrolase Family 2	candidate b-mannosidase	GH2 ?-mannosidase	-	-	-	-	-	-	-	-	-	-	-	TRIREDRAFT_69245
jgi|Trire2|112104|fgenesh5_pg.C_scaffold_33000002	112104	fgenesh5_pg.C_scaffold_33000002	1.28316	2.43371	0.703876	0.000132921	0.000400557	up in ∆ypr2		112104	TRIRE2_112104	33	6313	6406	4	2	-	-	-	-	-	-	-	-	-	-	-	unknown protein	-	-	-	-	-	-	-	-	-	-	-	TRIREDRAFT_112104
jgi|Trire2|70197|e_gw1.33.45.1	70197	e_gw1.33.45.1	3.5046	11.3498	5.13478	1.55339e-153	5.77927e-151	up in ∆ypr2		70197	TRIRE2_70197	33	43320	44375	4	16	-	-	-	-	-	-	-	-	-	-	-	Zn-dependent ߀-lactamase	NCU04908	0	0	-	-	-	-	-	-	-	-	TRIREDRAFT_70197
jgi|Trire2|112129|fgenesh5_pg.C_scaffold_33000027	112129	fgenesh5_pg.C_scaffold_33000027	1.23363	2.35158	0.393878	0.00113742	0.00288605	up in ∆ypr2		112129	TRIRE2_112129	33	64671	64714	4	22	Transcription factors	0	Zn2Cys6	0	hypothetical protein	0	0	YAL051W	-	-	-	Zn2Cys6 transcriptional regulator	-	-	-	-	-	-	-	-	-	-	-	TRIREDRAFT_112129
jgi|Trire2|112134|fgenesh5_pg.C_scaffold_33000032	112134	fgenesh5_pg.C_scaffold_33000032	1.07227	2.10274	5.79191	1.30587e-21	1.69233e-20	up in ∆ypr2		112134	TRIRE2_112134	33	74042	74470	4	27	Transcription factors	0	Fungal-trans	0	conserved hypothetical protein	87585	148629	YIL130W	-	-	-	Zn2Cys6 transcriptional regulator	NCU07055	0	0	-	-	-	-	-	-	-	-	TRIREDRAFT_112134
jgi|Trire2|112146|fgenesh5_pg.C_scaffold_33000044	112146	fgenesh5_pg.C_scaffold_33000044	4.97669	31.4872	5.96341	1.98131e-118	3.46885e-116	up in ∆ypr2	24	112146	TRIRE2_112146	33	100174	100176	4	36	-	-	-	-	-	-	-	-	-	-	-	unknown protein	-	-	-	-	-	-	-	-	-	-	-	TRIREDRAFT_112146
jgi|Trire2|112147|fgenesh5_pg.C_scaffold_33000045	112147	fgenesh5_pg.C_scaffold_33000045	4.84505	28.7412	3.56876	6.13923e-54	2.57358e-52	up in ∆ypr2	24	112147	TRIRE2_112147	33	105118	105477	4	37	-	-	-	-	-	-	-	-	-	-	-	unknown protein	-	-	-	-	-	-	-	-	-	-	-	TRIREDRAFT_112147
jgi|Trire2|5894|fgenesh1_pm.C_scaffold_33000014	5894	fgenesh1_pm.C_scaffold_33000014	1.23673	2.35664	2.98066	2.91663e-11	2.00637e-10	up in ∆ypr2	24	5894	TRIRE2_5894	33	106858	106890	4	38	CAZymes	0	Glycoside hydrolase	Glycoside hydrolase family109	0	300680	45259	YMR315W	-	-	-	GH109 protein	NCU09794	0	0	ANID_07353	1392	72972	74363	+	oxidoreductase family	IV	PF01408.14,PF01408.15	TRIREDRAFT_5894
jgi|Trire2|124084|estExt_fgenesh5_pg.C_330047	124084	estExt_fgenesh5_pg.C_330047	2.56108	5.9015	3.41695	2.1388e-28	3.81184e-27	up in ∆ypr2	24	124084	TRIRE2_124084	33	121517	121565	4	41	-	-	-	-	-	-	-	-	-	-	-	unknown protein	NCU03847	0	0	ANID_00825	941	122075	123015	-	conserved hypothetical protein	VIII	0	TRIREDRAFT_124084
jgi|Trire2|70608|e_gw1.38.35.1	70608	e_gw1.38.35.1	4.14658	17.7111	-1.23008	8.51569e-06	3.10353e-05	up in ∆ypr2		70608	TRIRE2_70608	38	47776	48093	4	69	-	-	-	-	-	-	-	-	-	-	-	unknown protein, HHE domains	NCU05005	0	0	ANID_08638	916	175098	176013	+	HHE domain-containing protein	III	PF01814.15,PF01814.16	TRIREDRAFT_70608
jgi|Trire2|112380|fgenesh5_pg.C_scaffold_38000012	112380	fgenesh5_pg.C_scaffold_38000012	8.61234	391.357	0.490606	1.60389e-22	2.18643e-21	up in ∆ypr2		112380	TRIRE2_112380	38	49267	49483	4	70	-	-	-	-	-	-	-	-	-	-	-	unknown protein	NCU04398	0	0	ANID_09194	1230	67013	68242	+	conserved hypothetical protein	IV	PF05368.6	TRIREDRAFT_112380
jgi|Trire2|70600|e_gw1.38.48.1	70600	e_gw1.38.48.1	3.42341	10.7288	-1.73032	0.00144567	0.0036067	up in ∆ypr2		70600	TRIRE2_70600	38	51156	51280	4	71	-	-	-	-	-	-	-	-	cat1	catalase	large subunit type of catalase (PMID|14601669)	catalase, large subunit type	-	-	-	ANID_08553	2217	52006	54222	+	catalase	Unmapped scaffolds	PF06628.4,PF00199.11,PF06628.5,PF00199.12	TRIREDRAFT_70600
jgi|Trire2|124198|estExt_fgenesh5_pg.C_380025	124198	estExt_fgenesh5_pg.C_380025	4.8281	28.4056	8.55907	7.14073e-192	1.06266e-188	up in ∆ypr2		124198	TRIRE2_124198	38	93518	93901	4	82	-	-	-	-	-	-	-	-	-	-	-	unknown protein	-	-	-	-	-	-	-	-	-	-	-	TRIREDRAFT_124198
jgi|Trire2|70631|e_gw1.38.8.1	70631	e_gw1.38.8.1	1.70159	3.2526	0.874626	3.23906e-07	1.42893e-06	up in ∆ypr2		70631	TRIRE2_70631	38	97802	98603	4	83	CAZymes	0	Carbohydrate esterase	Carbohydrate esterase family10	0	305317	49586	0	-	-	-	dipeptidyl peptidase 5	-	-	-	ANID_07046	2200	237315	239514	+	carboxylesterase	IV	PF00135.21,PF00135.20	TRIREDRAFT_70631
jgi|Trire2|21416|estExt_fgenesh1_pm.C_20011	21416	estExt_fgenesh1_pm.C_20011	1.53446	2.8968	5.31439	6.94221e-42	2.13014e-40	up in ∆ypr2		21416	TRIRE2_21416	2	112757	114349	4	96	-	-	-	-	-	-	-	-	-	-	-	unknown protein	NCU00802	0	0	-	-	-	-	-	-	-	-	TRIREDRAFT_21416
jgi|Trire2|103451|fgenesh5_pg.C_scaffold_2000039	103451	fgenesh5_pg.C_scaffold_2000039	1.39998	2.63897	2.90173	6.10989e-14	5.13219e-13	up in ∆ypr2		103451	TRIRE2_103451	2	130618	130707	4	103	-	-	-	-	-	-	-	-	\N	GDP-forming succinate-CoA ligase, beta subunit	\N	GDP-forming succinate-CoA ligase, beta subunit	-	-	-	-	-	-	-	-	-	-	-	TRIREDRAFT_103451
jgi|Trire2|55630|e_gw1.2.924.1	55630	e_gw1.2.924.1	1.08052	2.1148	2.6103	2.77988e-07	1.23798e-06	up in ∆ypr2		55630	TRIRE2_55630	2	136228	136372	4	105	-	-	-	-	-	-	-	-	-	-	-	monocarboxylate transporter	-	-	-	ANID_02591	1605	250054	251658	+	conserved hypothetical protein	VII	PF07690.9,PF07690.8	TRIREDRAFT_55630
jgi|Trire2|108669|fgenesh5_pg.C_scaffold_13000015	108669	fgenesh5_pg.C_scaffold_13000015	2.34172	5.06907	0.483692	3.71941e-09	2.06919e-08	up in ∆ypr2		108669	TRIRE2_108669	13	43588	43714	4	124	-	-	-	-	-	-	-	-	-	-	-	unknown protein	-	-	-	-	-	-	-	-	-	-	-	TRIREDRAFT_108669
jgi|Trire2|108671|fgenesh5_pg.C_scaffold_13000017	108671	fgenesh5_pg.C_scaffold_13000017	1.6245	3.08335	3.77926	8.59741e-26	1.3611e-24	up in ∆ypr2		108671	TRIRE2_108671	13	47706	47874	4	126	CAZymes	bgl3f	Glycoside hydrolase	Glycoside hydrolase family3	candidate b-glycosidase related to b-xylosidase	79493	200353	0	\N	Glycoside Hydrolase Family 3	candidate b-glycosidase	GH3 ?-glucosidase/glucan 1,4-?-glucosidase BGL3f	-	-	-	-	-	-	-	-	-	-	-	TRIREDRAFT_108671
jgi|Trire2|108676|fgenesh5_pg.C_scaffold_13000022	108676	fgenesh5_pg.C_scaffold_13000022	1.59115	3.01289	1.84466	1.45116e-07	6.69981e-07	up in ∆ypr2		108676	TRIRE2_108676	13	63175	63378	4	130	-	-	-	-	-	-	-	-	-	-	-	unknown protein, secreted, only in ascomycota and Acidothermicus cellulolyticus	-	-	-	-	-	-	-	-	-	-	-	TRIREDRAFT_108676
jgi|Trire2|22654|estExt_fgenesh1_pm.C_130006	22654	estExt_fgenesh1_pm.C_130006	1.60035	3.03216	7.54876	7.67253e-42	2.34616e-40	up in ∆ypr2		22654	TRIRE2_22654	13	67695	69104	4	132	-	-	-	-	-	-	-	-	-	-	-	monodehydroascorbate reductase	NCU05850	0	0	ANID_09103	1822	146461	148282	-	rubredoxin-NAD(+) reductase	IV	PF00355.19,PF07992.6,PF00070.19,PF00070.20,PF00355.18,PF07992.7	TRIREDRAFT_22654
jgi|Trire2|108684|fgenesh5_pg.C_scaffold_13000030	108684	fgenesh5_pg.C_scaffold_13000030	1.09995	2.14348	1.95311	2.22897e-06	8.90092e-06	up in ∆ypr2		108684	TRIRE2_108684	13	83767	83857	4	137	Effector proteins (competition and defense)	0	Proteins with known effector domains	0	IPR011329; IPR015131; Killer KP4 toxin	300654	58093	0	-	-	-	KP4 killer toxin	-	-	-	-	-	-	-	-	-	-	-	TRIREDRAFT_108684
jgi|Trire2|79222|estExt_GeneWisePlus.C_130059	79222	estExt_GeneWisePlus.C_130059	2.6774	6.39701	2.19257	7.24159e-27	1.1952e-25	up in ∆ypr2		79222	TRIRE2_79222	13	135265	136512	4	152	-	-	-	-	-	-	-	-	-	-	-	unknown protein	NCU00787	0	0	-	-	-	-	-	-	-	-	TRIREDRAFT_79222
jgi|Trire2|64018|e_gw1.13.399.1	64018	e_gw1.13.399.1	1.47473	2.77932	3.71968	4.84445e-14	4.12356e-13	up in ∆ypr2		64018	TRIRE2_64018	13	140487	140617	4	154	Heterotrimeric G-protein pathway	Hpr1	GPCRs	7-TM receptor	I (STE2-type pheromone receptor)	36032	147400	0	\N	mating type pheromone G-protein coupled receptor	candidate mating type pheromone G-protein coupled receptor	GPCR, mating type pheromone G-protein coupled receptor	NCU05758	pre-2	0	ANID_02520	1205	1080	2284	-	pheromone receptor PREB	VII	PF02116.8	TRIREDRAFT_64018
jgi|Trire2|64330|e_gw1.13.339.1	64330	e_gw1.13.339.1	1.09362	2.13408	3.38772	1.36651e-07	6.3319e-07	up in ∆ypr2		64330	TRIRE2_64330	13	143532	144096	4	155	-	-	-	-	-	-	-	-	-	-	-	indoleamine 2,3-dioxygenase	NCU05752	0	0	ANID_02509	1515	72109	73623	+	indoleamine 2,3-dioxygenase subfamily	VII	PF01231.10,PF01231.11	TRIREDRAFT_64330
jgi|Trire2|122523|estExt_fgenesh5_pg.C_130067	122523	estExt_fgenesh5_pg.C_130067	3.03428	8.19234	6.67889	5.05426e-69	3.22354e-67	up in ∆ypr2		122523	TRIRE2_122523	13	203911	204664	4	172	Transcription factors	0	Zn2Cys6	0	conserved hypothetical protein	127907	128625	YMR280C	\N	N-terminal fungal transcription regulatory domain-containing protein	The N-terminal region of a number of fungal transcriptional regulatory proteins contains a Cys-rich motif that is involved in zinc-dependent binding of DNA. The region forms a binuclear Zn cluster, in which two Zn atoms are bound by six Cys residues	Zn2Cys6 transcriptional regulator	NCU02142	0	0	ANID_03433	1387	37656	39042	-	C6 transcription factor	VI	PF00172.11,PF00172.10	TRIREDRAFT_122523
jgi|Trire2|122541|estExt_fgenesh5_pg.C_130097	122541	estExt_fgenesh5_pg.C_130097	1.27911	2.4269	4.84564	4.01203e-24	5.88233e-23	up in ∆ypr2		122541	TRIRE2_122541	13	307049	307150	4	197	Transcription factors	0	C2H2 zinc finger	0	conserved hypothetical protein	36070	89428	YDR253C	-	-	-	C2H2 transcriptional regulator	NCU10006	0	0	-	-	-	-	-	-	-	-	TRIREDRAFT_122541
jgi|Trire2|79271|estExt_GeneWisePlus.C_130146	79271	estExt_GeneWisePlus.C_130146	1.50436	2.83699	7.65964	1.21343e-30	2.40772e-29	up in ∆ypr2		79271	TRIRE2_79271	13	321485	321542	4	198	-	-	-	-	-	-	-	-	acu9	\N	\N	malate synthase	NCU10007	acu-9	0	ANID_06653	2059	240715	242773	-	malate synthase	I	PF01274.15,PF01274.14,TIGR01344	TRIREDRAFT_79271
jgi|Trire2|122569|estExt_fgenesh5_pg.C_130153	122569	estExt_fgenesh5_pg.C_130153	1.0533	2.07527	8.40973	3.77846e-06	1.4561e-05	up in ∆ypr2		122569	TRIRE2_122569	13	472031	472507	4	239	-	-	-	-	-	-	-	-	-	-	-	unknown protein	-	-	-	-	-	-	-	-	-	-	-	TRIREDRAFT_122569
jgi|Trire2|79324|estExt_GeneWisePlus.C_130258	79324	estExt_GeneWisePlus.C_130258	1.21904	2.32792	6.25262	7.55093e-37	1.94862e-35	up in ∆ypr2		79324	TRIRE2_79324	13	504813	505630	4	246	-	-	-	-	-	-	-	-	-	-	-	nucleoside-diphosphate-sugar epimerase, putative (check!)	-	-	-	ANID_08988	1097	30787	31883	+	conserved hypothetical protein	VII	PF01118.17	TRIREDRAFT_79324
jgi|Trire2|79329|estExt_GeneWisePlus.C_130263	79329	estExt_GeneWisePlus.C_130263	1.52689	2.88163	8.14371	8.79694e-33	1.89729e-31	up in ∆ypr2		79329	TRIRE2_79329	13	523202	523779	4	251	-	-	-	-	-	-	-	-	-	-	-	MFS permease	NCU03107	0	0	ANID_04019	1575	173228	174802	+	MFS transporter	II	PF07690.9,PF07690.8	TRIREDRAFT_79329
jgi|Trire2|49589|estExt_Genewise1.C_130360	49589	estExt_Genewise1.C_130360	1.28888	2.44339	7.13888	5.05254e-29	9.18822e-28	up in ∆ypr2		49589	TRIRE2_49589	13	693569	693712	4	295	-	-	-	-	-	-	-	-	-	-	-	unknown protein	NCU02092	0	0	-	-	-	-	-	-	-	-	TRIREDRAFT_49589
jgi|Trire2|122614|estExt_fgenesh5_pg.C_130245	122614	estExt_fgenesh5_pg.C_130245	1.80016	3.48259	1.93693	5.63376e-08	2.74584e-07	up in ∆ypr2		122614	TRIRE2_122614	13	807321	807553	4	314	-	-	-	-	-	-	-	-	-	-	-	orphan protein	-	-	-	-	-	-	-	-	-	-	-	TRIREDRAFT_122614
jgi|Trire2|59137|e_gw1.5.411.1	59137	e_gw1.5.411.1	1.0085	2.01182	5.52236	9.26533e-18	9.81377e-17	up in ∆ypr2		59137	TRIRE2_59137	5	1691995	1692507	4	349	-	-	-	-	-	-	-	-	-	-	-	unknown protein	NCU04946	0	0	-	-	-	-	-	-	-	-	TRIREDRAFT_59137
jgi|Trire2|46794|estExt_Genewise1.C_50904	46794	estExt_Genewise1.C_50904	1.80495	3.49418	8.91653	6.49792e-41	1.934e-39	up in ∆ypr2		46794	TRIRE2_46794	5	1670912	1672304	4	356	-	-	-	-	-	-	-	-	-	-	-	oligopeptide transporter	NCU05079	0	0	ANID_08903	2099	102659	104757	-	oligopeptide transporter	VII	PF00854.13,PF07690.8,PF00854.14	TRIREDRAFT_46794
jgi|Trire2|76620|estExt_GeneWisePlus.C_50837	76620	estExt_GeneWisePlus.C_50837	1.44583	2.7242	6.60999	8.37998e-22	1.10199e-20	up in ∆ypr2		76620	TRIRE2_76620	5	1627351	1628138	4	367	-	-	-	-	-	-	-	-	\N	glycerol-3-phosphate dehydrogenase	\N	Glycerol-3-phosphate dehydrogenase	NCU05454	0	0	ANID_01396	2272	63869	66140	-	glycerol-3-phosphate dehydrogenase	VIII	PF01266.17,PF00890.17,PF01266.16	TRIREDRAFT_76620
jgi|Trire2|58698|e_gw1.5.263.1	58698	e_gw1.5.263.1	2.08565	4.24467	1.99661	4.03514e-17	4.13185e-16	up in ∆ypr2		58698	TRIRE2_58698	5	1625376	1625821	4	368	-	-	-	-	-	-	-	-	\N	serine protease	42-123aa pfam05922, Subtilisin_N, Subtilisin N-terminal Region; 149-399aa pfam00082, Peptidase_S8, Subtilase family	subtilisin like protease (SUB2)	-	-	-	-	-	-	-	-	-	-	-	TRIREDRAFT_58698
jgi|Trire2|58525|e_gw1.5.237.1	58525	e_gw1.5.237.1	1.53984	2.90762	3.37402	2.58782e-10	1.61472e-09	up in ∆ypr2		58525	TRIRE2_58525	5	1619955	1621223	4	370	-	-	-	-	-	-	-	-	-	-	-	unknown protein	-	-	-	-	-	-	-	-	-	-	-	TRIREDRAFT_58525
jgi|Trire2|46764|estExt_Genewise1.C_50855	46764	estExt_Genewise1.C_50855	2.99257	7.95891	8.10059	6.08068e-41	1.82809e-39	up in ∆ypr2		46764	TRIRE2_46764	5	1610598	1610681	4	374	-	-	-	-	-	-	-	-	-	-	-	unknown protein	-	-	-	-	-	-	-	-	-	-	-	TRIREDRAFT_46764
jgi|Trire2|58479|e_gw1.5.202.1	58479	e_gw1.5.202.1	1.06261	2.0887	0.891038	0.000808234	0.002104	up in ∆ypr2		58479	TRIRE2_58479	5	1601367	1602575	4	377	CAZymes	0	Glycoside hydrolase	Glycoside hydrolase family109	0	39113	188014	YML051W	-	-	-	GH109 protein	-	-	-	-	-	-	-	-	-	-	-	TRIREDRAFT_58479
jgi|Trire2|53872|e_gw1.1.1459.1	53872	e_gw1.1.1459.1	2.82787	7.10027	-1.50808	0.00119804	0.00302697	up in ∆ypr2		53872	TRIRE2_53872	1	3729576	3730011	4	387	-	-	-	-	-	-	-	-	\N	Dehydratase	pfam00920, ILVD_EDD, Dehydratase family	Dihydroxy-acid dehydratase	-	-	-	ANID_05138	1889	118738	120626	+	dihydroxy-acid dehydratase	V	PF00920.13,PF00920.14,TIGR00110	TRIREDRAFT_53872
jgi|Trire2|53859|e_gw1.1.1848.1	53859	e_gw1.1.1848.1	1.47045	2.77108	3.72279	8.57314e-21	1.05731e-19	up in ∆ypr2		53859	TRIRE2_53859	1	3712683	3713711	4	392	-	-	-	-	-	-	-	-	-	-	-	C-4 sterol methyl oxidase	NCU07910	0	0	-	-	-	-	-	-	-	-	TRIREDRAFT_53859
jgi|Trire2|103393|fgenesh5_pg.C_scaffold_1001026	103393	fgenesh5_pg.C_scaffold_1001026	1.35248	2.5535	0.368528	0.000272075	0.000774421	up in ∆ypr2		103393	TRIRE2_103393	1	3691257	3691447	4	399	-	-	-	-	-	-	-	-	-	-	-	SSCRP	-	-	-	-	-	-	-	-	-	-	-	TRIREDRAFT_103393
jgi|Trire2|54260|e_gw1.1.560.1	54260	e_gw1.1.560.1	1.64657	3.13088	1.94962	9.62439e-09	5.09704e-08	up in ∆ypr2		54260	TRIRE2_54260	1	3679284	3679601	4	402	-	-	-	-	-	-	-	-	-	-	-	potential indoleamine 2,3-dioxygenase	-	-	-	ANID_01858	1422	164325	165746	+	indoleamine 2,3-dioxygenase pyrrole 2,3-dioxygenase	VII	PF01231.10,PF01231.11	TRIREDRAFT_54260
jgi|Trire2|53500|e_gw1.1.638.1	53500	e_gw1.1.638.1	1.22787	2.34221	4.74346	1.8537e-23	2.61479e-22	up in ∆ypr2		53500	TRIRE2_53500	1	3603139	3603240	4	420	-	-	-	-	-	-	-	-	-	-	-	unknown protein	NCU01347	0	0	ANID_03487	1082	53211	54292	-	conserved hypothetical protein	II	PF00043.17,PF00043.18	TRIREDRAFT_53500
jgi|Trire2|103366|fgenesh5_pg.C_scaffold_1000999	103366	fgenesh5_pg.C_scaffold_1000999	2.05692	4.16098	1.47478	2.38557e-11	1.65636e-10	up in ∆ypr2		103366	TRIRE2_103366	1	3582364	3583983	4	424	-	-	-	-	-	-	-	-	-	-	-	unknown protein	NCU04236	0	0	-	-	-	-	-	-	-	-	TRIREDRAFT_103366
jgi|Trire2|119956|estExt_fgenesh5_pg.C_10955	119956	estExt_fgenesh5_pg.C_10955	2.12076	4.34924	8.0827	1.70534e-40	5.05879e-39	up in ∆ypr2	25	119956	TRIRE2_119956	1	3499986	3499990	4	450	-	-	-	-	-	-	-	-	-	-	-	unknown protein	-	-	-	ANID_12348	312	62415	62726	+	predicted protein	VIII	0	TRIREDRAFT_119956
jgi|Trire2|32261|gw1.1.911.1	32261	gw1.1.911.1	1.07785	2.11089	4.27696	1.5453e-15	1.4433e-14	up in ∆ypr2	25	32261	TRIRE2_32261	1	3488816	3488957	4	451	-	-	-	-	-	-	-	-	-	-	-	unknown protein	NCU04644	0	0	ANID_04309	802	13416	14217	+	conserved hypothetical protein	III	PF06916.6	TRIREDRAFT_32261
jgi|Trire2|103336|fgenesh5_pg.C_scaffold_1000969	103336	fgenesh5_pg.C_scaffold_1000969	9.00774	514.753	0.870964	6.7104e-24	9.71105e-23	up in ∆ypr2	25	103336	TRIRE2_103336	1	3484481	3486276	4	452	-	-	-	-	-	-	-	-	-	-	-	unknown protein	NCU01012	0	0	-	-	-	-	-	-	-	-	TRIREDRAFT_103336
jgi|Trire2|53372|e_gw1.1.1572.1	53372	e_gw1.1.1572.1	1.01186	2.01651	3.98728	2.01148e-10	1.27379e-09	up in ∆ypr2	25	53372	TRIRE2_53372	1	3476921	3477725	4	456	-	-	-	-	-	-	-	-	-	-	-	acyltransferase 3	NCU01014	0	0	ANID_01696	1644	328820	330463	-	acyltransferase	VII	PF01757.15	TRIREDRAFT_53372
jgi|Trire2|54886|e_gw1.1.1987.1	54886	e_gw1.1.1987.1	1.3123	2.48337	-0.106689	0.0038732	0.0087843	up in ∆ypr2	25	54886	TRIRE2_54886	1	3473744	3473900	4	457	-	-	-	-	-	-	-	-	-	-	-	unknown protein	-	-	-	-	-	-	-	-	-	-	-	TRIREDRAFT_54886
jgi|Trire2|34297|gw1.1.1141.1	34297	gw1.1.1141.1	2.20106	4.59817	4.11921	1.4934e-19	1.72952e-18	up in ∆ypr2		34297	TRIRE2_34297	1	3436158	3436203	4	473	-	-	-	-	-	-	-	-	-	-	-	SSCRP	NCU06682	0	0	ANID_12426	672	4887	5558	-	hydrophobic protein LTI6A	Unmapped scaffolds	PF01679.10,PF01679.9	TRIREDRAFT_34297
jgi|Trire2|53542|e_gw1.1.193.1	53542	e_gw1.1.193.1	1.07709	2.10978	6.63013	7.34103e-28	1.27031e-26	up in ∆ypr2		53542	TRIRE2_53542	1	3048714	3049550	4	570	CAZymes	0	Glycoside hydrolase	Glycoside hydrolase family76	candidate a-glycosidase	161116	213831	YKL046C	\N	Glycoside Hydrolase Family 76	related to a bacterial a-1,6-mannanase	GH76 ?-1,6-mannanase	NCU02032	gh76-1	0	ANID_10345	1391	22040	23430	+	cell wall glycosyl hydrolase Dfg5	VI	PF03663.6,PF03663.7	TRIREDRAFT_53542
jgi|Trire2|110366|fgenesh5_pg.C_scaffold_20000025	110366	fgenesh5_pg.C_scaffold_20000025	1.21015	2.31361	2.04173	3.61908e-07	1.58951e-06	up in ∆ypr2		110366	TRIRE2_110366	20	73722	74404	4	608	-	-	-	-	-	-	-	-	-	-	-	orphan protein	-	-	-	-	-	-	-	-	-	-	-	TRIREDRAFT_110366
jgi|Trire2|80685|estExt_GeneWisePlus.C_200047	80685	estExt_GeneWisePlus.C_200047	2.4325	5.39828	3.42604	6.12513e-35	1.46625e-33	up in ∆ypr2		80685	TRIRE2_80685	20	96878	97614	4	613	-	-	-	-	-	-	-	-	-	-	-	unknown protein	-	-	-	-	-	-	-	-	-	-	-	TRIREDRAFT_80685
jgi|Trire2|67013|e_gw1.20.249.1	67013	e_gw1.20.249.1	1.29702	2.4572	1.85045	3.86074e-07	1.68735e-06	up in ∆ypr2		67013	TRIRE2_67013	20	313305	313435	4	667	Antioxidant system	cat-4	0	0	Catalase	283309	88881	YDR256C	\N	\N	\N	catalase	NCU05169	cat-4	ctt-1	-	-	-	-	-	-	-	-	TRIREDRAFT_67013
jgi|Trire2|110440|fgenesh5_pg.C_scaffold_20000099	110440	fgenesh5_pg.C_scaffold_20000099	1.96776	3.91159	5.55442	1.0528e-65	6.10419e-64	up in ∆ypr2		110440	TRIRE2_110440	20	317179	317385	4	668	-	-	-	-	-	-	-	-	-	-	-	orphan protein	-	-	-	-	-	-	-	-	-	-	-	TRIREDRAFT_110440
jgi|Trire2|5182|fgenesh1_pm.C_scaffold_20000048	5182	fgenesh1_pm.C_scaffold_20000048	2.7938	6.93452	4.01875	4.64372e-57	2.17088e-55	up in ∆ypr2		5182	TRIRE2_5182	20	319967	320932	4	669	-	-	-	-	-	-	-	-	-	-	-	iron-dependent peroxidase	-	-	-	-	-	-	-	-	-	-	-	TRIREDRAFT_5182
jgi|Trire2|66888|e_gw1.20.255.1	66888	e_gw1.20.255.1	1.61286	3.05859	4.22853	1.72413e-27	2.8992e-26	up in ∆ypr2	26	66888	TRIRE2_66888	20	353810	355339	4	679	CAZymes	0	Glycosyl transferase	Glycosyl transferase family71	0	291946	231540	YIL014W	\N	Glycosyltransferase Family 71	candidate a-glycosyltransferase	GT71 ?-1,3-mannosyltransferase	-	-	-	-	-	-	-	-	-	-	-	TRIREDRAFT_66888
jgi|Trire2|50996|estExt_Genewise1.C_200192	50996	estExt_Genewise1.C_200192	1.02908	2.04072	6.09337	7.49782e-22	9.88893e-21	up in ∆ypr2	26	50996	TRIRE2_50996	20	357017	357307	4	680	-	-	-	-	-	-	-	-	-	-	-	unknown protein, C2 domain	NCU01510	0	0	-	-	-	-	-	-	-	-	TRIREDRAFT_50996
jgi|Trire2|110455|fgenesh5_pg.C_scaffold_20000114	110455	fgenesh5_pg.C_scaffold_20000114	2.59574	6.04498	0.154753	7.22634e-09	3.87764e-08	up in ∆ypr2	26	110455	TRIRE2_110455	20	361108	361197	4	681	-	-	-	-	-	-	-	-	-	-	-	short chain dehydrogenase/reductase	-	-	-	ANID_02694	917	77786	78702	+	oxidoreductase	VI	PF00106.17,PF00106.18,PF08659.3	TRIREDRAFT_110455
jgi|Trire2|110471|fgenesh5_pg.C_scaffold_20000130	110471	fgenesh5_pg.C_scaffold_20000130	3.01884	8.10518	3.35902	4.90823e-46	1.66637e-44	up in ∆ypr2		110471	TRIRE2_110471	20	414717	414934	4	696	-	-	-	-	-	-	-	-	-	-	-	Cu2+/Zn2+ superoxide dismutase SOD1	-	-	-	-	-	-	-	-	-	-	-	TRIREDRAFT_110471
jgi|Trire2|33312|gw1.20.156.1	33312	gw1.20.156.1	1.20579	2.30664	6.6326	1.61626e-29	3.03823e-28	up in ∆ypr2		33312	TRIRE2_33312	20	461049	461261	4	707	-	-	-	-	-	-	-	-	-	-	-	unknown protein	NCU01559	0	0	ANID_02171	954	114977	115930	-	conserved hypothetical protein	VII	0	TRIREDRAFT_33312
jgi|Trire2|66937|e_gw1.20.62.1	66937	e_gw1.20.62.1	1.56467	2.95811	5.03056	1.548e-35	3.81826e-34	up in ∆ypr2		66937	TRIRE2_66937	20	574944	575573	4	733	-	-	-	-	-	-	-	-	-	-	-	FAD binding domain-containing protein	NCU06804	0	0	-	-	-	-	-	-	-	-	TRIREDRAFT_66937
jgi|Trire2|72259|kg2.C_scaffold_20000036	72259	kg2.C_scaffold_20000036	2.49876	5.65198	5.28739	1.05754e-34	2.48494e-33	up in ∆ypr2		72259	TRIRE2_72259	20	584884	585818	4	735	Heterotrimeric G-protein pathway	0	RGS proteins	0	RgsA-like	41236	83004	YOR107W	\N	PAK-box protein, p21-Rho binding	hypothetical PAK-box protein, p21-Rho binding, probable regulator of G-proteins	RgsA, regulator of G-protein signaling	NCU05435	0	0	ANID_05755	1976	432444	434419	-	conserved hypothetical protein	V	PF00615.12,PF00615.11	TRIREDRAFT_72259
jgi|Trire2|80291|estExt_GeneWisePlus.C_170428	80291	estExt_GeneWisePlus.C_170428	1.6548	3.14879	6.04932	2.31344e-50	8.98119e-49	up in ∆ypr2		80291	TRIRE2_80291	17	762610	763131	4	762	Transcription factors	0	Zn2Cys6	0	conserved hypothetical protein	52148	42523	YKL222C	-	-	-	Zn2Cys6 transcriptional regulator	-	-	-	ANID_08506	2586	7588	10173	-	conserved hypothetical protein	Unmapped scaffolds	PF00172.11,PF00172.10,PF04082.11	TRIREDRAFT_80291
jgi|Trire2|109883|fgenesh5_pg.C_scaffold_17000213	109883	fgenesh5_pg.C_scaffold_17000213	1.04145	2.0583	2.94115	3.23593e-07	1.42826e-06	up in ∆ypr2		109883	TRIRE2_109883	17	735565	735792	4	772	-	-	-	-	-	-	-	-	-	-	-	unknown protein	-	-	-	-	-	-	-	-	-	-	-	TRIREDRAFT_109883
jgi|Trire2|65711|e_gw1.17.354.1	65711	e_gw1.17.354.1	1.40895	2.65544	6.13851	1.19683e-26	1.95723e-25	up in ∆ypr2		65711	TRIRE2_65711	17	639988	640047	4	788	-	-	-	-	-	-	-	-	-	-	-	SAM-dependent methyltransferase	NCU10490	-	-	ANID_05415	1500	105803	107302	-	conserved hypothetical protein	V	PF00891.10,PF00891.11	TRIREDRAFT_65711
jgi|Trire2|109850|fgenesh5_pg.C_scaffold_17000180	109850	fgenesh5_pg.C_scaffold_17000180	1.56444	2.95764	6.36788	1.29236e-45	4.33815e-44	up in ∆ypr2		109850	TRIRE2_109850	17	590494	590915	4	798	-	-	-	-	-	-	-	-	-	-	-	unknown protein	NCU02172	0	0	ANID_05780	2280	511649	513928	+	conserved hypothetical protein	V	0	TRIREDRAFT_109850
jgi|Trire2|65883|e_gw1.17.372.1	65883	e_gw1.17.372.1	2.81376	7.03117	3.24773	2.26238e-35	5.53446e-34	up in ∆ypr2		65883	TRIRE2_65883	17	501239	501570	4	822	-	-	-	-	-	-	-	-	-	-	-	D-isomer-specific 2-hydroxy acid dehydrogenase	NCU05050	0	0	ANID_01563	1298	109276	110573	+	dehydrogenase	VII	PF02826.12,PF02826.11	TRIREDRAFT_65883
jgi|Trire2|66092|e_gw1.17.450.1	66092	e_gw1.17.450.1	3.20922	9.24853	3.65769	7.19847e-68	4.46355e-66	up in ∆ypr2		66092	TRIRE2_66092	17	487672	487807	4	828	-	-	-	-	-	-	-	-	-	-	-	orphan protein	NCU02596	0	0	ANID_06856	503	171650	172152	+	conserved hypothetical protein	I	0	TRIREDRAFT_66092
jgi|Trire2|65975|e_gw1.17.116.1	65975	e_gw1.17.116.1	1.78602	3.44861	2.90414	4.75914e-21	5.9767e-20	up in ∆ypr2		65975	TRIRE2_65975	17	484306	484626	4	829	-	-	-	-	-	-	-	-	-	-	-	unknown protein	NCU09858	0	0	ANID_00963	1059	289978	291036	+	acylamide-delta3(E)-desaturase	VIII	PF00487.17	TRIREDRAFT_65975
jgi|Trire2|65817|e_gw1.17.101.1	65817	e_gw1.17.101.1	3.78382	13.7735	2.73855	1.58314e-22	2.16144e-21	up in ∆ypr2		65817	TRIRE2_65817	17	427608	428585	4	844	CAZymes	0	Glycosyl transferase	Glycosyl transferase family69	0	316521	232012	0	-	-	-	GT69 ?-1,3-mannosyltransferase CMT1	-	-	-	-	-	-	-	-	-	-	-	TRIREDRAFT_65817
jgi|Trire2|65718|e_gw1.17.456.1	65718	e_gw1.17.456.1	2.63142	6.19638	6.86731	4.19894e-130	8.92675e-128	up in ∆ypr2		65718	TRIRE2_65718	17	426930	427016	4	845	-	-	-	-	-	-	-	-	-	-	-	unknown protein	-	-	-	-	-	-	-	-	-	-	-	TRIREDRAFT_65718
jgi|Trire2|65819|e_gw1.17.318.1	65819	e_gw1.17.318.1	1.20137	2.29957	2.43896	6.81274e-09	3.67337e-08	up in ∆ypr2		65819	TRIRE2_65819	17	410614	410694	4	850	heat shock proteins	0	HSP70 family	0	hypothetical protein, related to hsp70, related to S. cerevisiae SSB1p and to N. crassa hypothetical protein	157515	42380	YDL229W	-	-	-	Molecular chaperone Hsp70 family	-	-	-	-	-	-	-	-	-	-	-	TRIREDRAFT_65819
jgi|Trire2|80142|estExt_GeneWisePlus.C_170155	80142	estExt_GeneWisePlus.C_170155	2.01486	4.04142	10.4144	1.17223e-45	3.94976e-44	up in ∆ypr2		80142	TRIRE2_80142	17	277361	280132	4	894	heat shock proteins	0	HSP104/Clp family	0	hypothetical hsp104, related to S. cerevisiae HSP104p and to N. crassa heat shock protein 98	157453	216898	YLL026W	-	-	-	HSP104 and related ATP-dependent Clp proteases	NCU00104	hsp98	0	ANID_00858	3076	226860	229935	-	heat shock protein CLPA	VIII	PF07728.7,PF02861.13,PF10431.1,PF02861.12,PF00004.22,PF07724.6,PF07728.6,PF00004.21,PF07724.7,PF10431.2,PF00158.19	TRIREDRAFT_80142
jgi|Trire2|4941|fgenesh1_pm.C_scaffold_17000020	4941	fgenesh1_pm.C_scaffold_17000020	1.82797	3.55038	5.53599	3.314e-63	1.78257e-61	up in ∆ypr2		4941	TRIRE2_4941	17	213561	213913	4	906	Lipid Metabolism	faa2	Triglyceride utilization	Acyl-CoA synthetase	Acyl-CoA synthetase	298651	80487	YBR222C	-	-	-	phenylacetyl-CoA ligase,	NCU03295	0	0	ANID_05990	1771	82499	84269	-	phenylacetyl-CoA ligase	I	PF00501.21,PF00501.20	TRIREDRAFT_4941
jgi|Trire2|65915|e_gw1.17.330.1	65915	e_gw1.17.330.1	1.76133	3.3901	5.39112	2.67556e-32	5.6746e-31	up in ∆ypr2		65915	TRIRE2_65915	17	67895	68279	4	943	-	-	-	-	-	-	-	-	-	-	-	MFS permease	-	-	-	ANID_08814	2366	247563	249928	+	MFS allantoate transporter	III	PF07690.9,PF07690.8	TRIREDRAFT_65915
jgi|Trire2|109687|fgenesh5_pg.C_scaffold_17000017	109687	fgenesh5_pg.C_scaffold_17000017	1.17224	2.25362	2.68972	2.49196e-09	1.40917e-08	up in ∆ypr2		109687	TRIRE2_109687	17	46909	47122	4	950	-	-	-	-	-	-	-	-	\N	\N	pfam01488, Shikimate_DH, Shikimate / quinate 5-dehydrogenase	Shikimate dehydrogenase	NCU06025	qa-3	0	ANID_01137	990	280367	281356	-	quinate 5-dehydrogenase	VIII	PF01488.13,PF08501.4,PF08501.3,PF01488.12	TRIREDRAFT_109687
jgi|Trire2|66726|e_gw1.19.281.1	66726	e_gw1.19.281.1	3.67442	12.7677	3.53748	2.30143e-75	1.65721e-73	up in ∆ypr2		66726	TRIRE2_66726	19	5594	5727	4	970	-	-	-	-	-	-	-	-	-	-	-	FAD binding protein	-	-	-	ANID_09308	1601	213560	215160	+	FAD binding domain-containing protein	VIII	PF01565.16,PF08031.4,PF08031.5,PF01565.15	TRIREDRAFT_66726
jgi|Trire2|110167|fgenesh5_pg.C_scaffold_19000052	110167	fgenesh5_pg.C_scaffold_19000052	4.33691	20.2087	4.12668	2.72582e-108	3.80295e-106	up in ∆ypr2		110167	TRIRE2_110167	19	154043	154375	4	1012	-	-	-	-	-	-	-	-	-	-	-	orphan protein	-	-	-	-	-	-	-	-	-	-	-	TRIREDRAFT_110167
jgi|Trire2|50793|estExt_Genewise1.C_190090	50793	estExt_Genewise1.C_190090	1.12109	2.17512	3.07242	9.01653e-09	4.80075e-08	up in ∆ypr2		50793	TRIRE2_50793	19	206711	206872	4	1025	-	-	-	-	-	-	-	-	-	-	-	tyrosinase	NCU08615	0	0	ANID_08435	2920	171663	174582	+	conserved hypothetical protein	Unmapped scaffolds	PF00264.12,PF00264.13	TRIREDRAFT_50793
jgi|Trire2|123223|estExt_fgenesh5_pg.C_190071	123223	estExt_fgenesh5_pg.C_190071	1.03762	2.05283	5.48137	1.70075e-22	2.31493e-21	up in ∆ypr2		123223	TRIRE2_123223	19	228892	228955	4	1029	-	-	-	-	-	-	-	-	\N	\N	COG2008, GLY1, Threonine aldolase; endo-1,4-glucanase Cel12A (EC 3.2.1.4)	threonine aldolase GLY1	NCU00944	thr-5	0	ANID_07564	1352	470718	472069	-	l-allo-threonine aldolase	IV	PF01212.14,PF01212.13	TRIREDRAFT_123223
jgi|Trire2|123226|estExt_fgenesh5_pg.C_190074	123226	estExt_fgenesh5_pg.C_190074	2.08391	4.23954	6.00959	2.33777e-61	1.1928e-59	up in ∆ypr2		123226	TRIRE2_123226	19	231674	231867	4	1030	CAZymes	0	Glycoside hydrolase	Glycoside hydrolase family37	candidate trehalase	44425	42275	YDR001C	\N	Glycoside Hydrolase Family 37	candidate trehalase	GH37 ?,?-trehalase	NCU00943	tre-1	0	-	-	-	-	-	-	-	-	TRIREDRAFT_123226
jgi|Trire2|66562|e_gw1.19.190.1	66562	e_gw1.19.190.1	1.21986	2.32925	4.76709	6.43334e-21	8.01162e-20	up in ∆ypr2		66562	TRIRE2_66562	19	240978	241086	4	1032	-	-	-	-	-	-	-	-	-	-	-	unknown protein	-	-	-	-	-	-	-	-	-	-	-	TRIREDRAFT_66562
jgi|Trire2|5084|fgenesh1_pm.C_scaffold_19000028	5084	fgenesh1_pm.C_scaffold_19000028	3.48255	11.1777	1.24649	3.53295e-22	4.71535e-21	up in ∆ypr2		5084	TRIRE2_5084	19	258223	258260	4	1037	Asexual development	con-10	Orthologues of Neurospora crassa con genes involved in asexual reproduction	0	N.crassa CON-10 - conidation-specific protein CON-10	291013	92556	0	-	-	-	conidiation-specific protein 10	NCU07325	con-10	0	ANID_05015	593	494789	495381	+	conidiation-specific protein 10	III	PF10685.2,PF10685.1	TRIREDRAFT_5084
jgi|Trire2|66819|e_gw1.19.43.1	66819	e_gw1.19.43.1	1.8487	3.60175	5.46403	3.05062e-41	9.23355e-40	up in ∆ypr2		66819	TRIRE2_66819	19	262498	264171	4	1039	-	-	-	-	-	-	-	-	\N	conserved hypothetical protein	COG0833, LysP, Amino acid transporters	Amino acid transporter LysP	-	-	-	-	-	-	-	-	-	-	-	TRIREDRAFT_66819
jgi|Trire2|110214|fgenesh5_pg.C_scaffold_19000099	110214	fgenesh5_pg.C_scaffold_19000099	3.30999	9.9176	1.99229	1.4791e-30	2.91542e-29	up in ∆ypr2		110214	TRIRE2_110214	19	293602	294220	4	1050	-	-	-	-	-	-	-	-	-	-	-	orphan protein	-	-	-	-	-	-	-	-	-	-	-	TRIREDRAFT_110214
jgi|Trire2|66786|e_gw1.19.180.1	66786	e_gw1.19.180.1	2.70677	6.52856	1.96541	1.87099e-22	2.53891e-21	up in ∆ypr2		66786	TRIRE2_66786	19	336858	336999	4	1064	Heterotrimeric G-protein pathway	0	GPCRs	7-TM receptor	PTH11-like	316718	42454	0	-	-	-	PTH11 receptor	-	-	-	-	-	-	-	-	-	-	-	TRIREDRAFT_66786
jgi|Trire2|123251|estExt_fgenesh5_pg.C_190128	123251	estExt_fgenesh5_pg.C_190128	1.68253	3.20991	5.73267	6.72626e-17	6.78631e-16	up in ∆ypr2		123251	TRIRE2_123251	19	421842	423113	4	1080	-	-	-	-	-	-	-	-	\N	flavohemoglobin	\N	flavohemoglobin	-	-	-	-	-	-	-	-	-	-	-	TRIREDRAFT_123251
jgi|Trire2|5107|fgenesh1_pm.C_scaffold_19000051	5107	fgenesh1_pm.C_scaffold_19000051	2.82457	7.08403	2.28281	1.81132e-29	3.39775e-28	up in ∆ypr2		5107	TRIRE2_5107	19	439701	439894	4	1086	-	-	-	-	-	-	-	-	-	-	-	ACC deaminase [Trichoderma asperellum]	NCU04657	0	0	ANID_08899	1152	94160	95311	-	1-aminocyclopropane-1-carboxylate deaminase	VII	TIGR01274,PF00291.18	TRIREDRAFT_5107
jgi|Trire2|66776|e_gw1.19.185.1	66776	e_gw1.19.185.1	1.62452	3.0834	0.669881	4.45632e-05	0.000144798	up in ∆ypr2		66776	TRIRE2_66776	19	444529	445077	4	1088	-	-	-	-	-	-	-	-	-	-	-	unknown protein	-	-	-	ANID_09310	553	218654	219206	+	conserved hypothetical protein	VIII	0	TRIREDRAFT_66776
jgi|Trire2|110261|fgenesh5_pg.C_scaffold_19000146	110261	fgenesh5_pg.C_scaffold_19000146	2.70235	6.5086	3.35549	6.45559e-41	1.93223e-39	up in ∆ypr2		110261	TRIRE2_110261	19	456699	456941	4	1093	-	-	-	-	-	-	-	-	-	-	-	orphan protein	-	-	-	-	-	-	-	-	-	-	-	TRIREDRAFT_110261
jgi|Trire2|110262|fgenesh5_pg.C_scaffold_19000147	110262	fgenesh5_pg.C_scaffold_19000147	1.46521	2.76104	1.76043	5.35173e-09	2.92624e-08	up in ∆ypr2		110262	TRIRE2_110262	19	458349	458617	4	1094	-	-	-	-	-	-	-	-	-	-	-	Zinc-binding oxidoreductase	-	-	-	-	-	-	-	-	-	-	-	TRIREDRAFT_110262
jgi|Trire2|66751|e_gw1.19.354.1	66751	e_gw1.19.354.1	1.22042	2.33014	0.0409366	0.00362113	0.00826932	up in ∆ypr2		66751	TRIRE2_66751	19	463554	464258	4	1096	-	-	-	-	-	-	-	-	\N	dehydrogenase	hypothetical dehydrogenase	unknown protein	-	-	-	ANID_08299	754	6896	7649	+	short-chain alcohol dehydrogenase	Unmapped scaffolds	PF00106.18,PF08659.3	TRIREDRAFT_66751
jgi|Trire2|110265|fgenesh5_pg.C_scaffold_19000150	110265	fgenesh5_pg.C_scaffold_19000150	4.47582	22.2513	4.39234	1.9437e-142	5.10451e-140	up in ∆ypr2		110265	TRIRE2_110265	19	466653	467143	4	1097	-	-	-	-	-	-	-	-	-	-	-	unknown protein	-	-	-	ANID_06023	2035	52314	54348	-	conserved hypothetical protein	I	PF00175.14	TRIREDRAFT_110265
jgi|Trire2|123260|estExt_fgenesh5_pg.C_190147	123260	estExt_fgenesh5_pg.C_190147	1.67177	3.18606	3.17615	4.58336e-17	4.65584e-16	up in ∆ypr2		123260	TRIRE2_123260	19	469168	469196	4	1098	-	-	-	-	-	-	-	-	-	-	-	unknown protein	-	-	-	-	-	-	-	-	-	-	-	TRIREDRAFT_123260
jgi|Trire2|66696|e_gw1.19.189.1	66696	e_gw1.19.189.1	3.80228	13.9508	1.05462	2.4024e-17	2.48563e-16	up in ∆ypr2	27	66696	TRIRE2_66696	19	482896	483261	4	1101	-	-	-	-	-	-	-	-	-	-	-	unknown protein, Duf636	NCU01127	0	0	ANID_03558	577	53903	54479	-	DUF636 domain-containing protein	II	PF04828.7,PF04828.6	TRIREDRAFT_66696
jgi|Trire2|66689|e_gw1.19.17.1	66689	e_gw1.19.17.1	2.32637	5.01543	0.920278	9.50157e-12	6.81442e-11	up in ∆ypr2	27	66689	TRIRE2_66689	19	483979	484610	4	1102	-	-	-	-	-	-	-	-	\N	\N	cd01321, ADGF, Adenosine deaminase-related growth factors	Adenine deaminase/adenosine deaminase	-	-	-	-	-	-	-	-	-	-	-	TRIREDRAFT_66689
jgi|Trire2|110271|fgenesh5_pg.C_scaffold_19000156	110271	fgenesh5_pg.C_scaffold_19000156	1.76294	3.3939	-0.589709	0.00111006	0.00282305	up in ∆ypr2	27	110271	TRIRE2_110271	19	486123	487142	4	1103	-	-	-	-	-	-	-	-	-	-	-	NAD-dependent epimerase/dehydratase	-	-	-	-	-	-	-	-	-	-	-	TRIREDRAFT_110271
jgi|Trire2|110281|fgenesh5_pg.C_scaffold_19000166	110281	fgenesh5_pg.C_scaffold_19000166	3.96242	15.5886	-1.36321	2.68802e-05	8.99938e-05	up in ∆ypr2		110281	TRIRE2_110281	19	507499	508134	4	1113	-	-	-	-	-	-	-	-	-	-	-	unknown protein	-	-	-	-	-	-	-	-	-	-	-	TRIREDRAFT_110281
jgi|Trire2|123274|estExt_fgenesh5_pg.C_190186	123274	estExt_fgenesh5_pg.C_190186	2.22339	4.66991	7.55388	1.07263e-60	5.37052e-59	up in ∆ypr2		123274	TRIRE2_123274	19	569112	569447	4	1129	-	-	-	-	-	-	-	-	\N	aldehyde dehydrogenase	arylsulfatase domain COG3119.1; for scavenging S from organic sulfate esters; 5 transmembrane domains and signal sequence are consistent with membrane location	Aldehyde dehydrogenase	-	-	-	-	-	-	-	-	-	-	-	TRIREDRAFT_123274
jgi|Trire2|80654|estExt_GeneWisePlus.C_190306	80654	estExt_GeneWisePlus.C_190306	3.75275	13.48	4.13339	1.17143e-81	9.96162e-80	up in ∆ypr2		80654	TRIRE2_80654	19	580777	580976	4	1132	CAZymes	0	Glycosyl transferase	Glycosyl transferase family1	UDP-glucuronosyl and UDP-glucosyl transferase	128710	66295	YLR189C	\N	Glycosyltransferase Family 1	candidate UDP-glucose:sterol b-glucosyltransferase	UDP-glucuronosyl and UDP-glucosyl transferase	-	-	-	-	-	-	-	-	-	-	-	TRIREDRAFT_80654
jgi|Trire2|80659|estExt_GeneWisePlus.C_190326	80659	estExt_GeneWisePlus.C_190326	4.42246	21.4434	11.3696	1.1042e-156	4.69497e-154	up in ∆ypr2	28	80659	TRIRE2_80659	19	609194	609332	4	1141	-	-	-	-	-	-	-	-	\N	\N	\N	alcohol oxidase AOX1	NCU01853	0	0	ANID_00567	2416	587672	590087	-	choline dehydrogenase	VIII	PF05199.6,PF05199.5,PF00732.11,PF00732.12	TRIREDRAFT_80659
jgi|Trire2|123282|estExt_fgenesh5_pg.C_190201	123282	estExt_fgenesh5_pg.C_190201	2.63788	6.22416	3.49755	2.52526e-48	9.09196e-47	up in ∆ypr2	28	123282	TRIRE2_123282	19	614435	614515	4	1142	-	-	-	-	-	-	-	-	-	-	-	unknown protein	-	-	-	-	-	-	-	-	-	-	-	TRIREDRAFT_123282
jgi|Trire2|110323|fgenesh5_pg.C_scaffold_19000208	110323	fgenesh5_pg.C_scaffold_19000208	2.45539	5.48462	1.97446	1.73407e-21	2.23428e-20	up in ∆ypr2	28	110323	TRIRE2_110323	19	618915	619577	4	1144	-	-	-	-	-	-	-	-	-	-	-	orphan protein	-	-	-	-	-	-	-	-	-	-	-	TRIREDRAFT_110323
jgi|Trire2|66614|e_gw1.19.111.1	66614	e_gw1.19.111.1	1.93231	3.81665	1.79264	4.87769e-14	4.14395e-13	up in ∆ypr2	28	66614	TRIRE2_66614	19	621026	621862	4	1145	-	-	-	-	-	-	-	-	-	-	-	alpha/beta hydrolase	-	-	-	-	-	-	-	-	-	-	-	TRIREDRAFT_66614
jgi|Trire2|66598|e_gw1.19.124.1	66598	e_gw1.19.124.1	1.70944	3.27034	1.4166	2.93899e-08	1.48177e-07	up in ∆ypr2	28	66598	TRIRE2_66598	19	623260	623976	4	1146	-	-	-	-	-	-	-	-	-	-	-	NADPH:quinone oxidoreductase	-	-	-	-	-	-	-	-	-	-	-	TRIREDRAFT_66598
jgi|Trire2|110330|fgenesh5_pg.C_scaffold_19000215	110330	fgenesh5_pg.C_scaffold_19000215	1.97594	3.93386	-0.588567	0.000382316	0.00105982	up in ∆ypr2	28	110330	TRIRE2_110330	19	636367	636459	4	1151	-	-	-	-	-	-	-	-	-	-	-	unknown protein	-	-	-	ANID_10857	891	169868	170758	-	conserved hypothetical protein	I	0	TRIREDRAFT_110330
jgi|Trire2|66534|e_gw1.19.241.1	66534	e_gw1.19.241.1	3.651	12.562	4.04079	2.97486e-86	2.85619e-84	up in ∆ypr2	28	66534	TRIRE2_66534	19	638764	639498	4	1152	Secondary metabolism	0	Cytochrome P450	p450 superfamily (cI12078)	0	0	0	0	-	-	-	Cytochrome P450 CYP2 subfamily	NCU09636	0	0	-	-	-	-	-	-	-	-	TRIREDRAFT_66534
jgi|Trire2|28036|gw1.19.50.1	28036	gw1.19.50.1	3.48877	11.2259	3.00186	1.35501e-43	4.33653e-42	up in ∆ypr2	28	28036	TRIRE2_28036	19	650389	651296	4	1156	-	-	-	-	-	-	-	-	-	-	-	MFS permease	NCU08144	-	-	-	-	-	-	-	-	-	-	TRIREDRAFT_28036
jgi|Trire2|54972|e_gw1.1.336.1	54972	e_gw1.1.336.1	2.02089	4.05834	0.741882	6.79108e-09	3.66612e-08	up in ∆ypr2		54972	TRIRE2_54972	1	2421292	2422905	5	13	-	-	-	-	-	-	-	-	-	-	-	MFS permease	-	-	-	-	-	-	-	-	-	-	-	TRIREDRAFT_54972
jgi|Trire2|103034|fgenesh5_pg.C_scaffold_1000667	103034	fgenesh5_pg.C_scaffold_1000667	2.93771	7.66194	2.16884	3.2018e-30	6.18808e-29	up in ∆ypr2		103034	TRIRE2_103034	1	2417912	2418141	5	14	Transcription factors	0	Zn2Cys6	0	conserved hypothetical protein	0	52721	YNR063W	-	-	-	Zn2Cys6 transcriptional regulator	-	-	-	-	-	-	-	-	-	-	-	TRIREDRAFT_103034
jgi|Trire2|103031|fgenesh5_pg.C_scaffold_1000664	103031	fgenesh5_pg.C_scaffold_1000664	1.19556	2.29034	0.0903164	0.00428257	0.00960297	up in ∆ypr2		103031	TRIRE2_103031	1	2406353	2407453	5	17	-	-	-	-	-	-	-	-	-	-	-	unknown protein	-	-	-	-	-	-	-	-	-	-	-	TRIREDRAFT_103031
jgi|Trire2|74214|estExt_GeneWisePlus.C_11345	74214	estExt_GeneWisePlus.C_11345	1.68638	3.21847	3.56705	7.80431e-21	9.64124e-20	up in ∆ypr2		74214	TRIRE2_74214	1	2404032	2404260	5	18	-	-	-	-	-	-	-	-	-	-	-	unknown protein	-	-	-	ANID_02236	1951	43506	45456	+	DUF500 domain-containing protein	VII	PF04366.5,PF04366.4	TRIREDRAFT_74214
jgi|Trire2|71399|kg2.C_scaffold_1000184	71399	kg2.C_scaffold_1000184	1.29649	2.45631	4.78496	3.41511e-26	5.51421e-25	up in ∆ypr2		71399	TRIRE2_71399	1	2395425	2395705	5	20	CAZymes	0	Glycoside hydrolase	Glycoside hydrolase family16	candidate b-glycosidase distantly related to b-1,3-glucanase	92402	91306	0	\N	Glycoside Hydrolase Family 16	candidate b-glycosidase	GH16 endo-1,3-?-glucanase	-	-	-	-	-	-	-	-	-	-	-	TRIREDRAFT_71399
jgi|Trire2|74194|estExt_GeneWisePlus.C_11306	74194	estExt_GeneWisePlus.C_11306	2.96087	7.78596	7.84433	6.8937e-101	8.66955e-99	up in ∆ypr2		74194	TRIRE2_74194	1	2354765	2355084	5	36	CAZymes	0	Glycoside hydrolase	Glycoside hydrolase family99	lxr1	297930	110629	YNL202W	lxr1	L-xylulose reductase	\N	mannitol dehydrogenase LXR1	NCU09041	0	0	ANID_07590	801	570390	571190	-	L-xylulose reductase	IV	PF00106.17,PF00106.18,PF08659.3	TRIREDRAFT_74194
jgi|Trire2|44278|estExt_Genewise1.C_11338	44278	estExt_Genewise1.C_11338	1.19177	2.28432	9.58822	1.97335e-21	2.53525e-20	up in ∆ypr2		44278	TRIRE2_44278	1	2343288	2343531	5	39	Transport	0	Oligopeptide transporter OPT superfamily	transporter containing IPR004813 domain	0	156562	81566	YGL114W	-	-	-	Rab geranyl transferase escort protein	NCU09874	0	0	-	-	-	-	-	-	-	-	TRIREDRAFT_44278
jgi|Trire2|103009|fgenesh5_pg.C_scaffold_1000642	103009	fgenesh5_pg.C_scaffold_1000642	5.5526	46.9353	5.74012	2.02877e-150	7.24594e-148	up in ∆ypr2		103009	TRIRE2_103009	1	2339829	2340061	5	40	-	-	-	-	-	-	-	-	-	-	-	unknown protein	-	-	-	-	-	-	-	-	-	-	-	TRIREDRAFT_103009
jgi|Trire2|53824|e_gw1.1.1936.1	53824	e_gw1.1.1936.1	3.36107	10.275	4.12356	3.51757e-53	1.46086e-51	up in ∆ypr2		53824	TRIRE2_53824	1	2337661	2337738	5	41	-	-	-	-	-	-	-	-	-	-	-	unknown secreted protein	-	-	-	ANID_08625	1147	136136	137282	+	conserved hypothetical protein	III	PF11807.1	TRIREDRAFT_53824
jgi|Trire2|119823|estExt_fgenesh5_pg.C_10626	119823	estExt_fgenesh5_pg.C_10626	2.41807	5.34455	7.67458	6.45645e-88	6.5511e-86	up in ∆ypr2		119823	TRIRE2_119823	1	2326203	2327024	5	46	-	-	-	-	-	-	-	-	-	-	-	SAM-dependent methyltransferases	NCU04695	0	0	ANID_07175	801	128817	129617	+	ubiE/COQ5 methyltransferase	IV	PF07021.5,PF05175.7,PF08242.4,PF08241.5,PF08704.3,PF08003.4,PF08241.4,PF01209.11,PF08242.5,PF01135.12	TRIREDRAFT_119823
jgi|Trire2|53079|e_gw1.1.71.1	53079	e_gw1.1.71.1	2.3311	5.0319	5.52535	6.06104e-84	5.52235e-82	up in ∆ypr2		53079	TRIRE2_53079	1	2317714	2318111	5	48	Secondary metabolism	0	Cytochrome P450	bifunctional_CYPOR (cd06206)	0	0	0	0	-	-	-	NADP/FAD dependent oxidoreductase	-	-	-	-	-	-	-	-	-	-	-	TRIREDRAFT_53079
jgi|Trire2|102996|fgenesh5_pg.C_scaffold_1000629	102996	fgenesh5_pg.C_scaffold_1000629	2.07843	4.22349	-0.856315	0.00129661	0.0032594	up in ∆ypr2		102996	TRIRE2_102996	1	2301441	2302162	5	53	-	-	-	-	-	-	-	-	-	-	-	unknown protein	-	-	-	ANID_00723	1090	48130	49219	+	conserved hypothetical protein	VIII	0	TRIREDRAFT_102996
jgi|Trire2|102985|fgenesh5_pg.C_scaffold_1000618	102985	fgenesh5_pg.C_scaffold_1000618	1.21191	2.31644	6.30961	4.15171e-34	9.52971e-33	up in ∆ypr2		102985	TRIRE2_102985	1	2257966	2258633	5	64	-	-	-	-	-	-	-	-	-	-	-	unknown protein	-	-	-	-	-	-	-	-	-	-	-	TRIREDRAFT_102985
jgi|Trire2|74156|estExt_GeneWisePlus.C_11223	74156	estExt_GeneWisePlus.C_11223	1.01771	2.0247	2.59875	2.46502e-06	9.73902e-06	up in ∆ypr2		74156	TRIRE2_74156	1	2191952	2192445	5	80	-	-	-	-	-	-	-	-	pap1	aspartate protease	\N	aspartyl protease	NCU08739	0	0	-	-	-	-	-	-	-	-	TRIREDRAFT_74156
jgi|Trire2|1999|fgenesh1_pm.C_scaffold_1000333	1999	fgenesh1_pm.C_scaffold_1000333	1.91589	3.77345	4.85636	1.72297e-51	6.83751e-50	up in ∆ypr2		1999	TRIRE2_1999	1	2176845	2176946	5	86	-	-	-	-	-	-	-	-	-	-	-	unknown protein	NCU07921	0	0	-	-	-	-	-	-	-	-	TRIREDRAFT_1999
jgi|Trire2|102953|fgenesh5_pg.C_scaffold_1000586	102953	fgenesh5_pg.C_scaffold_1000586	1.61249	3.05779	3.9118	5.49701e-21	6.87434e-20	up in ∆ypr2		102953	TRIRE2_102953	1	2142152	2142638	5	96	Asexual development	dtr1	Orthologues of Neurospora crassa genes expressed upon conidiation	0	Dityrosine transporter	49156	71648	YBR043C	-	-	-	dityrosine transporter, required for spore wall synthesis	NCU01411	0	0	ANID_05656	1829	158159	159987	+	MFS multidrug resistance transporter	V	PF07690.9,PF07690.8,PF00083.17,TIGR00880	TRIREDRAFT_102953
jgi|Trire2|54703|e_gw1.1.1447.1	54703	e_gw1.1.1447.1	1.14892	2.21748	5.52012	3.54937e-26	5.72063e-25	up in ∆ypr2		54703	TRIRE2_54703	1	2044956	2045094	5	129	Transcription factors	0	C2H2 zinc finger	0	predicted protein	214001	30573	0	-	-	-	C2H2 transcriptional regulator	-	-	-	-	-	-	-	-	-	-	-	TRIREDRAFT_54703
jgi|Trire2|102920|fgenesh5_pg.C_scaffold_1000553	102920	fgenesh5_pg.C_scaffold_1000553	1.63998	3.11662	6.53424	6.40292e-39	1.77002e-37	up in ∆ypr2		102920	TRIRE2_102920	1	2030663	2030929	5	130	Transcription factors	0	C2H2 zinc finger	0	hypothetical protein	165061	125918	0	-	-	-	C2H2 transcriptional regulator	-	-	-	-	-	-	-	-	-	-	-	TRIREDRAFT_102920
jgi|Trire2|54865|e_gw1.1.1571.1	54865	e_gw1.1.1571.1	2.18437	4.54529	1.99951	1.35987e-05	4.78044e-05	up in ∆ypr2	29	54865	TRIRE2_54865	1	1966958	1967339	5	142	Sulfur metabolism	0	sulfur assimilation	EC number 2.A.3.8.4	methionine permease, related to S. cerevisiae Mup1p	297834	177947	YGR055W	\N	Amino acid transporter	COG0531, PotE, Amino acid transporters	Amino acid transporters	NCU04942	0	0	ANID_01631	1828	104025	105852	-	high-affinity methionine permease	VII	PF00324.14	TRIREDRAFT_54865
jgi|Trire2|102906|fgenesh5_pg.C_scaffold_1000539	102906	fgenesh5_pg.C_scaffold_1000539	1.07728	2.11006	1.08834	0.000273714	0.000778341	up in ∆ypr2	29	102906	TRIRE2_102906	1	1964214	1964413	5	143	-	-	-	-	-	-	-	-	-	-	-	orphan protein	-	-	-	-	-	-	-	-	-	-	-	TRIREDRAFT_102906
jgi|Trire2|119789|estExt_fgenesh5_pg.C_10532	119789	estExt_fgenesh5_pg.C_10532	1.38974	2.62032	7.34051	5.43276e-33	1.19187e-31	up in ∆ypr2	29	119789	TRIRE2_119789	1	1959009	1960018	5	144	-	-	-	-	-	-	-	-	-	-	-	MFS permease	NCU00195	0	0	ANID_02282	2005	13477	15481	+	MFS transporter	VII	PF07690.9,PF07690.8	TRIREDRAFT_119789
jgi|Trire2|44175|estExt_Genewise1.C_11097	44175	estExt_Genewise1.C_11097	2.18823	4.55745	8.12147	1.70751e-33	3.82113e-32	up in ∆ypr2		44175	TRIRE2_44175	1	1901913	1902890	5	166	Transport	0	General substrate transporter	transporter containing IPR005828 domain	hypothetical sugar transporter family protein	49508	177974	YKL217W	\N	lactate/pyruvate transporter	\N	MFS H+ sugar transporter	NCU07607	0	0	ANID_06703	1599	48095	49693	+	sugar transporter	I	PF07690.9,PF07690.8,PF00083.17,TIGR00891,PF00083.16	TRIREDRAFT_44175
jgi|Trire2|42063|gw1.1.2000.1	42063	gw1.1.2000.1	1.29043	2.44601	4.14879	3.67659e-20	4.39468e-19	up in ∆ypr2		42063	TRIRE2_42063	1	1888070	1888648	5	173	-	-	-	-	-	-	-	-	-	-	-	unknown protein	-	-	-	-	-	-	-	-	-	-	-	TRIREDRAFT_42063
jgi|Trire2|102876|fgenesh5_pg.C_scaffold_1000509	102876	fgenesh5_pg.C_scaffold_1000509	1.01849	2.0258	1.01802	0.00102104	0.00261529	up in ∆ypr2		102876	TRIRE2_102876	1	1884612	1884985	5	174	-	-	-	-	-	-	-	-	-	-	-	orphan protein	-	-	-	-	-	-	-	-	-	-	-	TRIREDRAFT_102876
jgi|Trire2|53331|e_gw1.1.1902.1	53331	e_gw1.1.1902.1	1.05313	2.07503	4.62741	5.25606e-15	4.78891e-14	up in ∆ypr2		53331	TRIRE2_53331	1	1822019	1822288	5	192	-	-	-	-	-	-	-	-	-	-	-	short chain dehydrogenase/reductase	NCU01703	0	0	ANID_08036	983	68849	69831	-	aldo-keto reductase	II	PF00248.14,PF00248.13	TRIREDRAFT_53331
jgi|Trire2|53888|e_gw1.1.821.1	53888	e_gw1.1.821.1	2.03	4.08405	3.87355	7.28707e-37	1.88598e-35	up in ∆ypr2		53888	TRIRE2_53888	1	1742035	1742201	5	211	-	-	-	-	-	-	-	-	-	-	-	pirin	NCU03369	mig-8	0	ANID_01460	1230	164594	165823	-	pirin domain-containing protein	VII	PF02678.8,PF05726.6,PF02678.9,PF07883.4,PF05726.5	TRIREDRAFT_53888
jgi|Trire2|102830|fgenesh5_pg.C_scaffold_1000463	102830	fgenesh5_pg.C_scaffold_1000463	1.29263	2.44974	5.01601	3.34122e-29	6.17675e-28	up in ∆ypr2		102830	TRIRE2_102830	1	1717213	1717710	5	219	-	-	-	-	-	-	-	-	-	-	-	unknown protein	NCU03535	0	0	ANID_10547	513	81207	81719	+	conserved hypothetical protein	III	0	TRIREDRAFT_102830
jgi|Trire2|1925|fgenesh1_pm.C_scaffold_1000259	1925	fgenesh1_pm.C_scaffold_1000259	1.54177	2.91151	8.18995	1.06798e-08	5.63595e-08	up in ∆ypr2		1925	TRIRE2_1925	1	1700386	1701098	5	224	Lipid Metabolism	0	Fatty acid synthesis and acyl group transfer	fatty acid desaturation	Sphingolipid fatty acid hydroxylase	129308	110700	YMR272C	-	-	-	fatty acid hydroxylase, Cytb5, SUR2-type hydroxylase/desaturase, catalytic region	NCU03492	0	0	ANID_00918	1352	155585	156936	-	fatty acid hydroxylase	VIII	PF04116.6,PF00173.20,PF00173.21,PF04116.5	TRIREDRAFT_1925
jgi|Trire2|53501|e_gw1.1.396.1	53501	e_gw1.1.396.1	1.44428	2.72128	6.17418	6.58759e-42	2.02829e-40	up in ∆ypr2		53501	TRIRE2_53501	1	1646206	1647567	5	239	-	-	-	-	-	-	-	-	-	-	-	unknown protein	NCU11076	-	-	ANID_01355	1359	135606	136964	+	DUF6 domain-containing protein	VIII	PF00892.13,PF00892.12	TRIREDRAFT_53501
jgi|Trire2|102789|fgenesh5_pg.C_scaffold_1000422	102789	fgenesh5_pg.C_scaffold_1000422	1.43199	2.69819	-0.187219	0.00163417	0.00403414	up in ∆ypr2		102789	TRIRE2_102789	1	1579427	1580096	5	260	-	-	-	-	-	-	-	-	-	-	-	orphan protein	-	-	-	-	-	-	-	-	-	-	-	TRIREDRAFT_102789
jgi|Trire2|102735|fgenesh5_pg.C_scaffold_1000368	102735	fgenesh5_pg.C_scaffold_1000368	1.61679	3.06692	2.80189	5.85015e-15	5.29777e-14	up in ∆ypr2		102735	TRIRE2_102735	1	1393663	1394137	5	312	-	-	-	-	-	-	-	-	\N	COOH terminal WSC domain-containing protein	containing conserved COOH terminal WSC domain possibly involved in carbohydrated binding.	unknown protein, WSC domain	NCU00309	0	0	-	-	-	-	-	-	-	-	TRIREDRAFT_102735
jgi|Trire2|119710|estExt_fgenesh5_pg.C_10361	119710	estExt_fgenesh5_pg.C_10361	1.47753	2.78471	5.44382	2.9765e-21	3.79132e-20	up in ∆ypr2		119710	TRIRE2_119710	1	1383063	1383466	5	314	-	-	-	-	-	-	-	-	-	-	-	MFS multidrug transporter	NCU00306	0	0	ANID_00732	2236	17794	20029	-	MFS multidrug transporter	VIII	PF07690.9,PF07690.8,PF00083.17,TIGR00880	TRIREDRAFT_119710
jgi|Trire2|1818|fgenesh1_pm.C_scaffold_1000152	1818	fgenesh1_pm.C_scaffold_1000152	1.69982	3.2486	9.21105	6.48319e-27	1.074e-25	up in ∆ypr2		1818	TRIRE2_1818	1	1029410	1029895	5	399	-	-	-	-	-	-	-	-	-	-	-	unknown protein	NCU01835	0	0	-	-	-	-	-	-	-	-	TRIREDRAFT_1818
jgi|Trire2|43873|estExt_Genewise1.C_10578	43873	estExt_Genewise1.C_10578	2.01661	4.04633	4.94595	6.47035e-41	1.93223e-39	up in ∆ypr2		43873	TRIRE2_43873	1	981101	981785	5	407	CAZymes	chi18-12/cht2	Glycoside hydrolase	Glycoside hydrolase family18	chitinase; fungal subgroup B chitinase	49469	178019	YLR286C	chi18-12	Glycoside Hydrolase Family 18	chitinase, precursor protein, glycosyl hydrolases family 18	GH18 chitinase CHI18-12	NCU04500	gh18-1	0	ANID_11059	1521	15880	17400	+	class III chitinase	II	PF00704.20,PF00704.21	TRIREDRAFT_43873
jgi|Trire2|119624|estExt_fgenesh5_pg.C_10202	119624	estExt_fgenesh5_pg.C_10202	1.6202	3.07418	1.55614	1.37096e-09	7.95404e-09	up in ∆ypr2		119624	TRIRE2_119624	1	749960	750050	5	472	-	-	-	-	-	-	-	-	-	-	-	unknown protein	-	-	-	-	-	-	-	-	-	-	-	TRIREDRAFT_119624
jgi|Trire2|102562|fgenesh5_pg.C_scaffold_1000195	102562	fgenesh5_pg.C_scaffold_1000195	4.08226	16.9389	0.757114	7.47765e-20	8.79683e-19	up in ∆ypr2		102562	TRIRE2_102562	1	705113	705802	5	481	-	-	-	-	-	-	-	-	-	-	-	unknown protein, Duf899 domain	-	-	-	-	-	-	-	-	-	-	-	TRIREDRAFT_102562
jgi|Trire2|102561|fgenesh5_pg.C_scaffold_1000194	102561	fgenesh5_pg.C_scaffold_1000194	2.27863	4.85217	3.12354	4.71652e-32	9.90912e-31	up in ∆ypr2		102561	TRIRE2_102561	1	702993	704459	5	482	-	-	-	-	-	-	-	-	-	-	-	FAD binding domain-containing protein	-	-	-	-	-	-	-	-	-	-	-	TRIREDRAFT_102561
jgi|Trire2|54230|e_gw1.1.1587.1	54230	e_gw1.1.1587.1	1.50418	2.83663	1.38647	8.62994e-08	4.1273e-07	up in ∆ypr2		54230	TRIRE2_54230	1	531948	533537	5	534	-	-	-	-	-	-	-	-	-	-	-	NACHT domain WD40 repeat-containing protein, related to HET	NCU09717	0	0	-	-	-	-	-	-	-	-	TRIREDRAFT_54230
jgi|Trire2|53722|e_gw1.1.959.1	53722	e_gw1.1.959.1	1.98922	3.97023	3.01111	1.31866e-22	1.81144e-21	up in ∆ypr2		53722	TRIRE2_53722	1	331958	332162	5	581	-	-	-	-	-	-	-	-	-	-	-	unknown protein	NCU09231	0	0	-	-	-	-	-	-	-	-	TRIREDRAFT_53722
jgi|Trire2|53267|e_gw1.1.480.1	53267	e_gw1.1.480.1	1.10311	2.14818	3.25183	8.57982e-10	5.07346e-09	up in ∆ypr2		53267	TRIRE2_53267	1	171231	172679	5	626	-	-	-	-	-	-	-	-	-	-	-	unknown protein, only in fungi	-	-	-	-	-	-	-	-	-	-	-	TRIREDRAFT_53267
jgi|Trire2|102411|fgenesh5_pg.C_scaffold_1000044	102411	fgenesh5_pg.C_scaffold_1000044	1.4249	2.68495	1.77871	1.65982e-08	8.59659e-08	up in ∆ypr2		102411	TRIRE2_102411	1	164883	165335	5	628	-	-	-	-	-	-	-	-	-	-	-	unknown protein	-	-	-	-	-	-	-	-	-	-	-	TRIREDRAFT_102411
jgi|Trire2|73519|estExt_GeneWisePlus.C_10050	73519	estExt_GeneWisePlus.C_10050	1.6571	3.15381	6.78747	1.40759e-42	4.364e-41	up in ∆ypr2		73519	TRIRE2_73519	1	107655	108132	5	642	-	-	-	-	-	-	-	-	-	-	-	unknown protein, 4 TM	NCU03735	0	0	ANID_00600	917	703763	704679	+	conserved hypothetical protein	VIII	0	TRIREDRAFT_73519
jgi|Trire2|53777|e_gw1.1.252.1	53777	e_gw1.1.252.1	1.81486	3.51825	3.38774	3.50707e-21	4.4481e-20	up in ∆ypr2		53777	TRIRE2_53777	1	76467	76645	5	648	-	-	-	-	-	-	-	-	-	-	-	unknown protein	NCU03751	0	0	-	-	-	-	-	-	-	-	TRIREDRAFT_53777
jgi|Trire2|73516|estExt_GeneWisePlus.C_10038	73516	estExt_GeneWisePlus.C_10038	4.06337	16.7185	9.00938	3.39489e-169	2.52608e-166	up in ∆ypr2		73516	TRIRE2_73516	1	72276	72363	5	649	Asexual development	ccg-1	Orthologues of Neurospora crassa ccg genes involved in asexual reproduction	0	N.crassa GRG-1 - glucose-repressible gene-1 protein	52968	229103	0	-	-	-	Grg1 Glucose repressible protein	NCU03753	ccg-1	0	ANID_09285	548	149001	149548	-	conserved hypothetical protein	VIII	PF11034.1	TRIREDRAFT_73516
jgi|Trire2|119534|estExt_fgenesh5_pg.C_10016	119534	estExt_fgenesh5_pg.C_10016	2.10378	4.29835	7.14934	2.92529e-67	1.80137e-65	up in ∆ypr2		119534	TRIRE2_119534	1	48779	50005	5	655	-	-	-	-	-	-	-	-	-	-	-	orphan protein	-	-	-	-	-	-	-	-	-	-	-	TRIREDRAFT_119534
jgi|Trire2|102382|fgenesh5_pg.C_scaffold_1000015	102382	fgenesh5_pg.C_scaffold_1000015	1.33065	2.51516	6.95357	1.6235e-36	4.14177e-35	up in ∆ypr2		102382	TRIRE2_102382	1	40246	40332	5	657	-	-	-	-	-	-	-	-	-	-	-	hydroxyacylglutathione hydrolase	NCU03749	0	0	ANID_06840	1212	135859	137070	+	hydroxyacylglutathione hydrolase	I	PF00753.19,TIGR03413,PF00753.20	TRIREDRAFT_102382
jgi|Trire2|52073|estExt_Genewise1.C_280001	52073	estExt_Genewise1.C_280001	1.12244	2.17715	6.28166	2.65189e-26	4.29741e-25	up in ∆ypr2		52073	TRIRE2_52073	28	4270	6801	5	672	-	-	-	-	-	-	-	-	\N	sulfatase	arylsulfatase domain COG3119.1;for scavenging S from organic sulfate esters; 5 transmembrane domains and signal sequence are consistent with plasma membrane location	sulfatase	-	-	-	ANID_07229	2853	73164	76016	+	sulfatase domain-containing protein	IV	PF00884.15,PF00884.16,PF01663.15	TRIREDRAFT_52073
jgi|Trire2|69282|e_gw1.28.73.1	69282	e_gw1.28.73.1	2.40182	5.2847	4.16262	6.67948e-57	3.09021e-55	up in ∆ypr2		69282	TRIRE2_69282	28	11592	12101	5	674	-	-	-	-	-	-	-	-	-	-	-	monocarboxylate transporter	-	-	-	-	-	-	-	-	-	-	-	TRIREDRAFT_69282
jgi|Trire2|81819|estExt_GeneWisePlus.C_280019	81819	estExt_GeneWisePlus.C_280019	3.61484	12.2511	3.55754	2.46383e-14	2.1442e-13	up in ∆ypr2		81819	TRIRE2_81819	28	36789	37490	5	679	-	-	-	-	-	-	-	-	-	-	-	unknown protein	-	-	-	-	-	-	-	-	-	-	-	TRIREDRAFT_81819
jgi|Trire2|81822|estExt_GeneWisePlus.C_280025	81822	estExt_GeneWisePlus.C_280025	1.12714	2.18425	7.12751	1.48984e-13	1.21486e-12	up in ∆ypr2		81822	TRIRE2_81822	28	42239	44596	5	681	-	-	-	-	-	-	-	-	\N	Conserved hypothetical protein	Related to mitochondrial leucyl-tRNA synthetase.	mitochondrial leucyl-tRNA synthetase.	NCU03814	leu-5	0	ANID_06526	3025	109017	112041	-	leucyl-tRNA synthetase	I	PF00133.15,PF09334.4,PF08264.6,TIGR00396	TRIREDRAFT_81822
jgi|Trire2|81843|estExt_GeneWisePlus.C_280055	81843	estExt_GeneWisePlus.C_280055	1.50175	2.83185	3.95691	5.33546e-24	7.77167e-23	up in ∆ypr2		81843	TRIRE2_81843	28	95835	96380	5	693	-	-	-	-	-	-	-	-	-	-	-	Alkaline phosphatase	NCU01376	pho-2	0	ANID_02493	2104	13747	15850	-	extracellular phytase	VII	PF00245.12,PF00884.16,PF00245.13,PF01663.15	TRIREDRAFT_81843
jgi|Trire2|123888|estExt_fgenesh5_pg.C_280033	123888	estExt_fgenesh5_pg.C_280033	2.82087	7.06587	6.82545	2.42927e-126	4.92976e-124	up in ∆ypr2		123888	TRIRE2_123888	28	103650	103763	5	696	-	-	-	-	-	-	-	-	\N	\N	homology to A. falvus Aflatoxin biosynthesis gene hypA	unknown protein	NCU03793	0	0	ANID_07517	1754	311431	313184	-	conserved hypothetical protein	IV	0	TRIREDRAFT_123888
jgi|Trire2|69290|e_gw1.28.60.1	69290	e_gw1.28.60.1	1.13655	2.19854	3.05515	8.01925e-11	5.26886e-10	up in ∆ypr2		69290	TRIRE2_69290	28	121221	122602	5	701	-	-	-	-	-	-	-	-	\N	Asparaginase	cd00411, Asparaginase, Asparaginase (amidohydrolase); 3' domain cd00204, ANK, ankyrin repeats	Asparaginase, Asparaginase (amidohydrolase); 3' domain cd00204, ANK, ankyrin repeats	NCU03768	0	0	ANID_08169	2082	115939	118020	-	lysophospholipase	II	PF00710.13,PF00023.22,PF00710.12,PF00023.23	TRIREDRAFT_69290
jgi|Trire2|34221|gw1.28.161.1	34221	gw1.28.161.1	2.96133	7.7884	-0.192786	5.11241e-08	2.50404e-07	up in ∆ypr2		34221	TRIRE2_34221	28	182245	182544	5	721	Transcription factors	0	Myb	0	conserved hypothetical protein	53194	19767	YMR213W	-	-	-	myb transcriptional regulator	NCU01312	rca-1	myb-1	ANID_00279	945	401372	402316	-	conserved hypothetical protein	VIII	PF00249.23,PF00249.24	TRIREDRAFT_34221
jgi|Trire2|123911|estExt_fgenesh5_pg.C_280074	123911	estExt_fgenesh5_pg.C_280074	1.80343	3.49048	5.60729	1.76297e-47	6.19748e-46	up in ∆ypr2		123911	TRIRE2_123911	28	203774	204056	5	727	-	-	-	-	-	-	-	-	\N	hypothetical protein	\N	unknown protein	-	-	-	-	-	-	-	-	-	-	-	TRIREDRAFT_123911
jgi|Trire2|72524|kg2.C_scaffold_28000020	72524	kg2.C_scaffold_28000020	1.52296	2.8738	0.691844	1.08808e-05	3.89396e-05	up in ∆ypr2		72524	TRIRE2_72524	28	210428	210611	5	728	Transcription factors	0	bZIP	0	conserved hypothetical protein	53179	33598	0	\N	basic leucine zipper transcription factor domain-containing protein	The basic-leucine zipper (bZIP) transcription factors of contain a basic region mediating sequence-specific DNA-binding followed by a leucine zipper region required for dimerization.	bZIP transcription factor	-	-	-	-	-	-	-	-	-	-	-	TRIREDRAFT_72524
jgi|Trire2|69426|e_gw1.28.227.1	69426	e_gw1.28.227.1	1.55179	2.93182	-0.0171339	0.000374754	0.00104113	up in ∆ypr2		69426	TRIRE2_69426	28	246783	247106	5	741	-	-	-	-	-	-	-	-	-	-	-	copper transporter	-	-	-	ANID_08608	709	89084	89792	+	conserved hypothetical protein	III	PF03576.7	TRIREDRAFT_69426
jgi|Trire2|69228|e_gw1.28.72.1	69228	e_gw1.28.72.1	1.42627	2.68751	4.7898	1.2447e-30	2.46429e-29	up in ∆ypr2		69228	TRIRE2_69228	28	249199	249529	5	742	-	-	-	-	-	-	-	-	\N	Adenosylmethionine-8-amino-7-oxononanoate aminotransferase-like protein	COG0161, BioA, Adenosylmethionine-8-amino-7-oxononanoate aminotransferase	BioA Adenosylmethionine--amino--oxononanoate aminotransferase	NCU08011	0	0	ANID_00991	1559	7925	9483	-	aminotransferase	VIII	PF00202.13,PF00202.14	TRIREDRAFT_69228
jgi|Trire2|111682|fgenesh5_pg.C_scaffold_28000095	111682	fgenesh5_pg.C_scaffold_28000095	1.05085	2.07175	1.38406	0.000127265	0.000384292	up in ∆ypr2		111682	TRIRE2_111682	28	268205	269001	5	747	-	-	-	-	-	-	-	-	-	-	-	unknown protein	-	-	-	ANID_08478	1419	306795	308213	+	conserved hypothetical protein	Unmapped scaffolds	PF11017.1	TRIREDRAFT_111682
jgi|Trire2|52165|estExt_Genewise1.C_280186	52165	estExt_Genewise1.C_280186	2.71421	6.56235	5.06514	2.34471e-29	4.37075e-28	up in ∆ypr2		52165	TRIRE2_52165	28	275152	275181	5	750	-	-	-	-	-	-	-	-	-	-	-	unknown protein, 1 TM	NCU03660	0	0	ANID_05768	1446	469540	470985	-	suppressor Sfk1	V	PF10277.2,PF10277.1	TRIREDRAFT_52165
jgi|Trire2|69362|e_gw1.28.247.1	69362	e_gw1.28.247.1	1.09114	2.13042	2.42092	8.13231e-08	3.89557e-07	up in ∆ypr2		69362	TRIRE2_69362	28	331059	331303	5	771	Lipid Metabolism	0	lipase	phospholipase	Phospholiase A	52517	33744	0	-	-	-	phospholipase A2 protein family	NCU03670	0	0	-	-	-	-	-	-	-	-	TRIREDRAFT_69362
jgi|Trire2|80425|estExt_GeneWisePlus.C_180236	80425	estExt_GeneWisePlus.C_180236	1.0591	2.08362	6.54174	1.00069e-23	1.43191e-22	up in ∆ypr2		80425	TRIRE2_80425	18	537152	538984	5	831	-	-	-	-	-	-	-	-	-	-	-	unknown protein	NCU03697	0	0	ANID_02042	2199	136973	139171	-	FAD binding domain-containing protein	VII	PF00667.12,PF00175.14,PF00667.13,PF00175.13	TRIREDRAFT_80425
jgi|Trire2|66280|e_gw1.18.6.1	66280	e_gw1.18.6.1	1.50324	2.83479	5.04911	1.65603e-32	3.53748e-31	up in ∆ypr2		66280	TRIRE2_66280	18	335320	339819	5	869	-	-	-	-	-	-	-	-	-	-	-	unknown protein	NCU04112	0	0	-	-	-	-	-	-	-	-	TRIREDRAFT_66280
jgi|Trire2|50616|estExt_Genewise1.C_180149	50616	estExt_Genewise1.C_180149	3.45927	10.9988	5.028	1.09132e-84	1.01504e-82	up in ∆ypr2		50616	TRIRE2_50616	18	274963	275260	5	880	-	-	-	-	-	-	-	-	-	-	-	Coenzyme A transferase	NCU08145	0	0	ANID_09394	1955	480092	482046	-	succinyl-CoA:3-ketoacid-coenzyme A transferase subunit A	VIII	TIGR02428,TIGR02429,PF01144.15,PF01144.16	TRIREDRAFT_50616
jgi|Trire2|109972|fgenesh5_pg.C_scaffold_18000069	109972	fgenesh5_pg.C_scaffold_18000069	1.9262	3.80054	4.07027	5.2435e-26	8.39053e-25	up in ∆ypr2		109972	TRIRE2_109972	18	184301	184538	5	908	-	-	-	-	-	-	-	-	-	-	-	orphan protein	-	-	-	-	-	-	-	-	-	-	-	TRIREDRAFT_109972
jgi|Trire2|109949|fgenesh5_pg.C_scaffold_18000046	109949	fgenesh5_pg.C_scaffold_18000046	5.62703	49.4203	-1.92346	0.000695565	0.00183315	up in ∆ypr2		109949	TRIRE2_109949	18	105290	105315	5	928	-	-	-	-	-	-	-	-	-	-	-	unknown protein	-	-	-	-	-	-	-	-	-	-	-	TRIREDRAFT_109949
jgi|Trire2|80335|estExt_GeneWisePlus.C_180053	80335	estExt_GeneWisePlus.C_180053	4.75761	27.051	1.76704	3.34401e-27	5.59152e-26	up in ∆ypr2		80335	TRIRE2_80335	18	103129	104151	5	929	-	-	-	-	-	-	-	-	-	-	-	unknown protein	-	-	-	-	-	-	-	-	-	-	-	TRIREDRAFT_80335
jgi|Trire2|109925|fgenesh5_pg.C_scaffold_18000022	109925	fgenesh5_pg.C_scaffold_18000022	4.70655	26.1104	2.13285	1.32559e-45	4.43302e-44	up in ∆ypr2		109925	TRIRE2_109925	18	54709	54830	5	947	-	-	-	-	-	-	-	-	-	-	-	unknown protein	-	-	-	-	-	-	-	-	-	-	-	TRIREDRAFT_109925
jgi|Trire2|66276|e_gw1.18.346.1	66276	e_gw1.18.346.1	1.35139	2.55159	4.49002	5.77002e-26	9.21655e-25	up in ∆ypr2		66276	TRIRE2_66276	18	37841	38353	5	953	-	-	-	-	-	-	-	-	-	-	-	unknown protein	-	-	-	-	-	-	-	-	-	-	-	TRIREDRAFT_66276
jgi|Trire2|109905|fgenesh5_pg.C_scaffold_18000002	109905	fgenesh5_pg.C_scaffold_18000002	1.05801	2.08206	1.01737	0.000557089	0.00149556	up in ∆ypr2		109905	TRIRE2_109905	18	5380	6720	5	962	-	-	-	-	-	-	-	-	-	-	-	unknown protein	-	-	-	ANID_09265	1404	88008	89411	-	conserved hypothetical protein	VIII	PF02458.8	TRIREDRAFT_109905
jgi|Trire2|112656|fgenesh5_pg.C_scaffold_53000005	112656	fgenesh5_pg.C_scaffold_53000005	1.41466	2.66597	1.10169	3.39552e-06	1.31306e-05	up in ∆ypr2		112656	TRIRE2_112656	53	15692	16193	5	968	-	-	-	-	-	-	-	-	-	-	-	orphan protein	-	-	-	-	-	-	-	-	-	-	-	TRIREDRAFT_112656
jgi|Trire2|73104|kg2.C_scaffold_53000001	73104	kg2.C_scaffold_53000001	1.70069	3.25057	2.53858	4.35875e-16	4.17589e-15	up in ∆ypr2		73104	TRIRE2_73104	53	17569	17616	5	969	Transcription factors	0	Zn2Cys6	0	fungal specific transcription factor, putative	315146	156681	YCR106W	\N	N-terminal binuclear Zn cluster-containing/DNA binding domain-containing protein	\N	Zn2Cys6 transcriptional regulator	NCU03110	0	0	-	-	-	-	-	-	-	-	TRIREDRAFT_73104
jgi|Trire2|112499|fgenesh5_pg.C_scaffold_42000003	112499	fgenesh5_pg.C_scaffold_42000003	1.73513	3.32909	1.58624	2.25015e-10	1.41391e-09	up in ∆ypr2		112499	TRIRE2_112499	42	6740	6886	5	977	Transcription factors	0	Zn2Cys6	0	hypothetical protein	315062	203624	0	-	-	-	Zn2Cys6 transcriptional regulator	-	-	-	-	-	-	-	-	-	-	-	TRIREDRAFT_112499
jgi|Trire2|111951|fgenesh5_pg.C_scaffold_30000090	111951	fgenesh5_pg.C_scaffold_30000090	1.55674	2.94188	4.09011	2.52203e-24	3.72834e-23	up in ∆ypr2		111951	TRIRE2_111951	30	212297	213065	5	1004	-	-	-	-	-	-	-	-	-	-	-	orphan protein	-	-	-	-	-	-	-	-	-	-	-	TRIREDRAFT_111951
jgi|Trire2|124016|estExt_fgenesh5_pg.C_300077	124016	estExt_fgenesh5_pg.C_300077	1.0374	2.05253	6.70327	7.06347e-25	1.06717e-23	up in ∆ypr2		124016	TRIRE2_124016	30	173637	173721	5	1014	CAZymes	agl2	Glycoside hydrolase	Glycoside hydrolase family36	a-galactosidase AGL2 (GenBank acc. No. CAA93245) (EC 3.2.1.22)	82772	46577	0	\N	Glycoside Hydrolase Family 36	a-galactosidase (EC 3.2.1.22)	GH36 ?-galactosidase AGL2	-	-	-	ANID_08138	2400	23171	25570	-	alpha-galactosidase C	II	PF02065.11,PF02065.10,PF02638.8	TRIREDRAFT_124016
jgi|Trire2|5818|fgenesh1_pm.C_scaffold_30000020	5818	fgenesh1_pm.C_scaffold_30000020	1.2153	2.32189	2.24232	1.77748e-08	9.17937e-08	up in ∆ypr2		5818	TRIRE2_5818	30	139335	140009	5	1028	-	-	-	-	-	-	-	-	-	-	-	DSBA oxidoreductase	NCU02220	mig-7	0	ANID_10641	779	135583	136361	+	conserved hypothetical protein	V	PF01323.12,PF01323.13	TRIREDRAFT_5818
jgi|Trire2|111912|fgenesh5_pg.C_scaffold_30000051	111912	fgenesh5_pg.C_scaffold_30000051	1.57971	2.9891	3.41846	3.79992e-18	4.10272e-17	up in ∆ypr2		111912	TRIRE2_111912	30	127157	127384	5	1033	-	-	-	-	-	-	-	-	-	-	-	carbonic anhydrase	NCU01103	0	0	ANID_12035	655	269170	269824	+	carbonic anhydrase	V	PF00484.12	TRIREDRAFT_111912
jgi|Trire2|69736|e_gw1.30.36.1	69736	e_gw1.30.36.1	1.88831	3.70202	3.72724	7.66799e-32	1.59598e-30	up in ∆ypr2		69736	TRIRE2_69736	30	114885	115510	5	1037	CAZymes	0	Glycoside hydrolase	Glycoside hydrolase family30	candidate b-1,6-glucanase	156641	76895	0	\N	Glycoside Hydrolase Family 30	candidate b-1,6-glucanase	GH30 glucan endo 1,6-?-glucanase	-	-	-	-	-	-	-	-	-	-	-	TRIREDRAFT_69736
jgi|Trire2|111901|fgenesh5_pg.C_scaffold_30000040	111901	fgenesh5_pg.C_scaffold_30000040	1.35494	2.55787	0.990333	1.93541e-05	6.61356e-05	up in ∆ypr2		111901	TRIRE2_111901	30	96797	97768	5	1044	-	-	-	-	-	-	-	-	-	-	-	unknown proteins	-	-	-	ANID_00019	954	77388	78341	+	NAD dependent epimerase/dehydratase	VIII	PF00106.18,PF04321.10,PF01370.14,PF01073.12	TRIREDRAFT_111901
jgi|Trire2|69811|e_gw1.30.32.1	69811	e_gw1.30.32.1	2.82934	7.10747	0.0678986	1.36966e-08	7.15603e-08	up in ∆ypr2		69811	TRIRE2_69811	30	91417	91963	5	1046	-	-	-	-	-	-	-	-	\N	Gamma-glutamyltranspeptidase-like protein	pfam01019, G_glu_transpept, Gamma-glutamyltranspeptidase	?-glutamyltransferase	-	-	-	ANID_10444	2308	703242	705549	-	gamma-glutamyltranspeptidase	II	PF01019.13,PF01019.14,TIGR00066	TRIREDRAFT_69811
jgi|Trire2|5807|fgenesh1_pm.C_scaffold_30000009	5807	fgenesh1_pm.C_scaffold_30000009	2.55732	5.88612	2.90614	3.31346e-34	7.64493e-33	up in ∆ypr2		5807	TRIRE2_5807	30	83339	83375	5	1049	CAZymes	0	Glycoside hydrolase	Glycoside hydrolase family95	candidate a-glycosidase distantly related to a-1,2-L-fucosidase	50230	67860	0	\N	Glycoside Hydrolase Family 95	related to a bacterial a-L-fucosidase	GH95 ?-L-fucosidase	-	-	-	ANID_08149	2701	25713	28413	+	alpha-fucosidase	II	0	TRIREDRAFT_5807
jgi|Trire2|69695|e_gw1.30.99.1	69695	e_gw1.30.99.1	1.16611	2.24406	1.81326	1.91124e-05	6.5385e-05	up in ∆ypr2		69695	TRIRE2_69695	30	57316	58450	5	1059	Transcription factors	0	Zn2Cys6	0	conserved hypothetical protein	0	125006	YJL206C	-	-	-	Zn2Cys6 transcriptional regulator	-	-	-	ANID_10192	2455	178945	181399	-	fungal specific transcription factor domain-containing protein	VII	PF00172.11,PF00172.10,PF04082.10,PF04082.11	TRIREDRAFT_69695
jgi|Trire2|70988|e_gw1.46.34.1	70988	e_gw1.46.34.1	3.03854	8.2166	2.21936	1.16753e-30	2.3218e-29	up in ∆ypr2		70988	TRIRE2_70988	46	46945	47844	5	1082	-	-	-	-	-	-	-	-	-	-	-	Flavin-containing monooxygenase	-	-	-	-	-	-	-	-	-	-	-	TRIREDRAFT_70988
jgi|Trire2|70972|e_gw1.46.10.1	70972	e_gw1.46.10.1	4.9164	30.1983	3.77883	3.97282e-61	2.01553e-59	up in ∆ypr2		70972	TRIRE2_70972	46	17130	17438	5	1091	-	-	-	-	-	-	-	-	-	-	-	orphan protein	-	-	-	-	-	-	-	-	-	-	-	TRIREDRAFT_70972
jgi|Trire2|104061|fgenesh5_pg.C_scaffold_3000016	104061	fgenesh5_pg.C_scaffold_3000016	1.4305	2.69541	0.308622	0.000298583	0.000844219	up in ∆ypr2	30	104061	TRIRE2_104061	3	40655	40819	6	16	Transcription factors	0	Zn2Cys6	0	unnamed protein	141953	44495	0	-	-	-	unknown protein	-	-	-	-	-	-	-	-	-	-	-	TRIREDRAFT_104061
jgi|Trire2|56845|e_gw1.3.823.1	56845	e_gw1.3.823.1	3.96993	15.67	-1.36175	2.60223e-05	8.74166e-05	up in ∆ypr2	30	56845	TRIRE2_56845	3	41932	43329	6	17	-	-	-	-	-	-	-	-	-	-	-	flavoprotein monooxygenase	-	-	-	ANID_08206	1519	41155	42673	+	flavin dependent monooxygenase	II	PF00743.12,PF07992.7	TRIREDRAFT_56845
jgi|Trire2|57045|e_gw1.3.982.1	57045	e_gw1.3.982.1	3.18866	9.11764	0.649797	5.96562e-14	5.01572e-13	up in ∆ypr2	30	57045	TRIRE2_57045	3	44151	45143	6	18	-	-	-	-	-	-	-	-	-	-	-	unknown protein	-	-	-	ANID_12033	1041	90351	91391	+	epoxide hydrolase	V	PF00561.13,PF00561.12	TRIREDRAFT_57045
jgi|Trire2|56314|e_gw1.3.742.1	56314	e_gw1.3.742.1	1.15519	2.22714	1.50039	1.3473e-05	4.74182e-05	up in ∆ypr2	30	56314	TRIRE2_56314	3	48357	48512	6	20	-	-	-	-	-	-	-	-	\N	PotE Amino acid transporter	COG0531, PotE, Amino acid transporters	Amino acid transporter PotE	-	-	-	ANID_02287	2367	30918	33284	-	GABA permease	VII	PF00324.14	TRIREDRAFT_56314
jgi|Trire2|57015|e_gw1.3.907.1	57015	e_gw1.3.907.1	1.26653	2.40582	1.15331	3.19709e-05	0.000105925	up in ∆ypr2	30	57015	TRIRE2_57015	3	50433	50486	6	21	-	-	-	-	-	-	-	-	-	-	-	Amino acid transporters	-	-	-	-	-	-	-	-	-	-	-	TRIREDRAFT_57015
jgi|Trire2|104077|fgenesh5_pg.C_scaffold_3000032	104077	fgenesh5_pg.C_scaffold_3000032	1.8357	3.56944	1.74357	3.28788e-12	2.43227e-11	up in ∆ypr2		104077	TRIRE2_104077	3	81506	81606	6	32	-	-	-	-	-	-	-	-	\N	Amino acid transporter-like protein	COG0531, PotE, Amino acid transporters	Amino acid transporter PotE	-	-	-	-	-	-	-	-	-	-	-	TRIREDRAFT_104077
jgi|Trire2|75146|estExt_GeneWisePlus.C_30073	75146	estExt_GeneWisePlus.C_30073	1.06593	2.09352	6.65266	7.14968e-24	1.033e-22	up in ∆ypr2		75146	TRIRE2_75146	3	124243	125904	6	45	RAS-GTPases	0	GTPase regulators	Rab GTPase activator	RabGAP/TBC	90589	89077	YPL249C	-	-	-	unknown protein	NCU02211	0	0	ANID_03752	2868	641109	643976	-	TBC domain-containing protein	II	PF00566.11	TRIREDRAFT_75146
jgi|Trire2|104097|fgenesh5_pg.C_scaffold_3000052	104097	fgenesh5_pg.C_scaffold_3000052	1.61606	3.06536	2.59816	5.89065e-15	5.32364e-14	up in ∆ypr2	31	104097	TRIRE2_104097	3	146097	146711	6	52	-	-	-	-	-	-	-	-	-	-	-	unknown protein	-	-	-	ANID_00467	1090	267142	268231	-	conserved hypothetical protein	VIII	0	TRIREDRAFT_104097
jgi|Trire2|56771|e_gw1.3.1058.1	56771	e_gw1.3.1058.1	1.27448	2.41912	2.94359	7.37169e-10	4.39398e-09	up in ∆ypr2	31	56771	TRIRE2_56771	3	147668	147856	6	53	-	-	-	-	-	-	-	-	-	-	-	SSCRP	NCU07977	0	0	ANID_10135	914	236508	237421	-	conserved hypothetical protein	VIII	0	TRIREDRAFT_56771
jgi|Trire2|56835|e_gw1.3.1017.1	56835	e_gw1.3.1017.1	3.90304	14.9601	0.799107	9.95322e-20	1.16173e-18	up in ∆ypr2	31	56835	TRIRE2_56835	3	151247	151882	6	55	-	-	-	-	-	-	-	-	-	-	-	unknown protein	-	-	-	-	-	-	-	-	-	-	-	TRIREDRAFT_56835
jgi|Trire2|75156|estExt_GeneWisePlus.C_30086	75156	estExt_GeneWisePlus.C_30086	6.21883	74.4828	0.516699	1.15789e-21	1.50931e-20	up in ∆ypr2	31	75156	TRIRE2_75156	3	153407	153661	6	56	-	-	-	-	-	-	-	-	-	-	-	unknown protein	NCU07981	0	0	ANID_05488	6496	344349	350844	-	conserved hypothetical protein	V	PF12396.1	TRIREDRAFT_75156
jgi|Trire2|56418|e_gw1.3.613.1	56418	e_gw1.3.613.1	2.09405	4.26946	2.46807	2.05212e-21	2.63267e-20	up in ∆ypr2	31	56418	TRIRE2_56418	3	158433	159177	6	57	CAZymes	0	Glycoside hydrolase	Glycoside hydrolase family55	candidate b-1,3-exoglucanase	45176	45064	YGL095C	\N	Glycoside Hydrolase Family 55	candidate b-1,3-glucanase	GH55 ?-1 3-glucanase	-	-	-	ANID_04852	3184	39518	42701	-	exo-beta-1,3-glucanase	III	0	TRIREDRAFT_56418
jgi|Trire2|104106|fgenesh5_pg.C_scaffold_3000061	104106	fgenesh5_pg.C_scaffold_3000061	1.52934	2.88654	-0.295823	0.00133905	0.00335665	up in ∆ypr2		104106	TRIRE2_104106	3	167935	168840	6	62	-	-	-	-	-	-	-	-	\N	\N	\N	ADP/ATP carrier protein	-	-	-	-	-	-	-	-	-	-	-	TRIREDRAFT_104106
jgi|Trire2|26255|gw1.3.96.1	26255	gw1.3.96.1	1.14398	2.2099	3.39725	2.37599e-10	1.4867e-09	up in ∆ypr2		26255	TRIRE2_26255	3	170986	172529	6	64	Transcription factors	0	Fungal-trans	0	C6 zinc finger domain-containing protein	319844	44566	YIL130W	-	-	-	Zn2Cys6 transcriptional regulator	-	-	-	ANID_07332	2441	133388	135828	+	C6 zinc finger domain-containing protein	IV	PF00172.11,PF00172.10,PF04082.11	TRIREDRAFT_26255
jgi|Trire2|36335|gw1.3.660.1	36335	gw1.3.660.1	1.24303	2.36695	3.21283	4.68318e-12	3.45588e-11	up in ∆ypr2		36335	TRIRE2_36335	3	179936	180007	6	67	Transcription factors	0	Fungal-trans	0	conserved hypothetical protein	44933	159892	YMR168C	-	-	-	Zn2Cys6 transcriptional regulator	-	-	-	-	-	-	-	-	-	-	-	TRIREDRAFT_36335
jgi|Trire2|36703|gw1.3.688.1	36703	gw1.3.688.1	2.35113	5.10223	3.28745	1.99901e-32	4.2498e-31	up in ∆ypr2		36703	TRIRE2_36703	3	191698	191890	6	70	Transcription factors	0	Zn2Cys6	0	C6 transcription factor, putative	289040	194406	YPL248C	-	-	-	Zn2Cys6 transcriptional regulator	-	-	-	ANID_03863	2359	101469	103827	+	conserved hypothetical protein	II	PF00172.10,PF04082.10,PF04082.11	TRIREDRAFT_36703
jgi|Trire2|75165|estExt_GeneWisePlus.C_30125	75165	estExt_GeneWisePlus.C_30125	1.3479	2.54541	4.42984	4.9109e-25	7.50847e-24	up in ∆ypr2		75165	TRIRE2_75165	3	218943	219340	6	79	-	-	-	-	-	-	-	-	-	-	-	MFS permease	NCU03468	0	0	-	-	-	-	-	-	-	-	TRIREDRAFT_75165
jgi|Trire2|56758|e_gw1.3.424.1	56758	e_gw1.3.424.1	1.01311	2.01826	1.05206	0.0020099	0.00484906	up in ∆ypr2		56758	TRIRE2_56758	3	294407	294627	6	102	-	-	-	-	-	-	-	-	-	-	-	unknown protein	NCU06596	0	0	ANID_07052	1020	255652	256671	+	conserved hypothetical protein	IV	0	TRIREDRAFT_56758
jgi|Trire2|104182|fgenesh5_pg.C_scaffold_3000137	104182	fgenesh5_pg.C_scaffold_3000137	2.16361	4.48036	3.5421	2.61921e-26	4.25216e-25	up in ∆ypr2	32	104182	TRIRE2_104182	3	396452	396504	6	137	Transcription factors	0	Zn2Cys6	0	fungal specific transcription factor, putative	280220	159674	YLR278C	\N	N-terminal binuclear Zn cluster-containing protein	\N	Zn2Cys6 transcriptional regulator	-	-	-	ANID_08298	1661	3304	4964	+	conserved hypothetical protein	Unmapped scaffolds	PF00172.11,PF00172.10,PF04082.10,PF04082.11	TRIREDRAFT_104182
jgi|Trire2|56370|e_gw1.3.939.1	56370	e_gw1.3.939.1	2.41872	5.34698	2.4574	8.92334e-24	1.28304e-22	up in ∆ypr2	32	56370	TRIRE2_56370	3	398768	399880	6	138	-	-	-	-	-	-	-	-	\N	isocitrate/isopropylmalate dehydrogenase	COG0473, LeuB, Isocitrate/isopropylmalate dehydrogenase	Isocitrate/isopropylmalate dehydrogenase	-	-	-	ANID_04822	1208	154337	155544	+	tartrate dehydrogenase	III	PF00180.12,TIGR02089,PF00180.13	TRIREDRAFT_56370
jgi|Trire2|56700|e_gw1.3.326.1	56700	e_gw1.3.326.1	1.74719	3.35705	1.18293	9.41626e-06	3.41086e-05	up in ∆ypr2	32	56700	TRIRE2_56700	3	401406	401779	6	139	-	-	-	-	-	-	-	-	-	-	-	unknown protein	-	-	-	-	-	-	-	-	-	-	-	TRIREDRAFT_56700
jgi|Trire2|56744|e_gw1.3.821.1	56744	e_gw1.3.821.1	1.16713	2.24565	4.63478	6.92043e-21	8.59423e-20	up in ∆ypr2		56744	TRIRE2_56744	3	422846	423328	6	149	Calcium signaling	0	Calcium transporters	0	hypothetical Ca2+ transporter; putative Ca2+/proton exchanger, related to S. cerevisiae Vcx1p	211778	15200	YDL128W	\N	Ca2+ transporter	hypothetical Ca2+ transporter	Calcium transporter	-	-	-	-	-	-	-	-	-	-	-	TRIREDRAFT_56744
jgi|Trire2|120357|estExt_fgenesh5_pg.C_30143	120357	estExt_fgenesh5_pg.C_30143	1.73533	3.32957	5.14567	2.8245e-39	7.88125e-38	up in ∆ypr2		120357	TRIRE2_120357	3	432648	433673	6	150	-	-	-	-	-	-	-	-	-	-	-	Zinc-binding oxidoreductase	-	-	-	ANID_10098	999	331326	332324	-	zinc-binding oxidoreductase	VIII	PF00107.18,PF00107.19	TRIREDRAFT_120357
jgi|Trire2|56860|e_gw1.3.426.1	56860	e_gw1.3.426.1	1.19066	2.28258	5.28714	1.3851e-27	2.34679e-26	up in ∆ypr2		56860	TRIRE2_56860	3	452082	452343	6	159	-	-	-	-	-	-	-	-	-	-	-	unknown protein	-	-	-	ANID_05989	897	81490	82386	+	NAD dependent epimerase/dehydratase	I	PF01370.14	TRIREDRAFT_56860
jgi|Trire2|56819|e_gw1.3.379.1	56819	e_gw1.3.379.1	1.1057	2.15203	4.48453	9.33952e-17	9.28648e-16	up in ∆ypr2		56819	TRIRE2_56819	3	477317	477850	6	168	Sexual development	ECM4	Other genes involved in meiosis in yeasts	0	Glutathione-S-transferase domain,	90432	231757	YKR076W	-	-	-	glutathione-S-transferase	NCU04368	0	0	ANID_10273	1240	123155	124394	-	glutathione S-transferase Gst3	VII	PF00043.17,PF00043.18	TRIREDRAFT_56819
jgi|Trire2|120365|estExt_fgenesh5_pg.C_30181	120365	estExt_fgenesh5_pg.C_30181	1.61419	3.0614	5.44995	4.58906e-52	1.84575e-50	up in ∆ypr2		120365	TRIRE2_120365	3	555413	556375	6	191	Transcription factors	0	bZIP	0	predicted protein	90402	226201	YIL036W	\N	Basic-Leucine zipper transcription factor	\N	BZIP transcriptional regulator	-	-	-	-	-	-	-	-	-	-	-	TRIREDRAFT_120365
jgi|Trire2|72611|kg2.C_scaffold_3000046	72611	kg2.C_scaffold_3000046	1.9604	3.89171	5.82899	4.59384e-49	1.71625e-47	up in ∆ypr2		72611	TRIRE2_72611	3	604868	605471	6	206	Transcription factors	0	Zn2Cys6	0	predicted protein	81200	226216	YMR280C	\N	N-terminal binuclear Zn cluster-containing protein	\N	Zn2Cys6 transcriptional regulator	-	-	-	-	-	-	-	-	-	-	-	TRIREDRAFT_72611
jgi|Trire2|104251|fgenesh5_pg.C_scaffold_3000206	104251	fgenesh5_pg.C_scaffold_3000206	1.26081	2.3963	3.196	0.000567139	0.00151844	up in ∆ypr2		104251	TRIRE2_104251	3	612219	612232	6	208	-	-	-	-	-	-	-	-	-	-	-	unknown protein	-	-	-	-	-	-	-	-	-	-	-	TRIREDRAFT_104251
jgi|Trire2|120371|estExt_fgenesh5_pg.C_30199	120371	estExt_fgenesh5_pg.C_30199	4.58113	23.9363	5.43387	1.83189e-162	1.02231e-159	up in ∆ypr2		120371	TRIRE2_120371	3	625541	626385	6	210	Antioxidant system	cat-7	0	0	Catalase	233892	45138	YGR088W	\N	catalase	Bacterial type catalase	Catalase	-	-	-	-	-	-	-	-	-	-	-	TRIREDRAFT_120371
jgi|Trire2|21595|estExt_fgenesh1_pm.C_30089	21595	estExt_fgenesh1_pm.C_30089	1.54033	2.90862	3.99718	2.39084e-25	3.70622e-24	up in ∆ypr2		21595	TRIRE2_21595	3	631175	632349	6	211	-	-	-	-	-	-	-	-	-	-	-	MFS permease	-	-	-	-	-	-	-	-	-	-	-	TRIREDRAFT_21595
jgi|Trire2|75271|estExt_GeneWisePlus.C_30365	75271	estExt_GeneWisePlus.C_30365	1.29035	2.44588	6.18057	1.81228e-37	4.78753e-36	up in ∆ypr2		75271	TRIRE2_75271	3	647464	648405	6	213	-	-	-	-	-	-	-	-	-	-	-	pyridoxine biosynthesis protein PDX1	NCU06550	pdx-1	0	ANID_07725	1280	50998	52277	+	pyridoxine biosynthesis protein	IV	TIGR00343,PF01680.9,PF01680.10,PF05690.7	TRIREDRAFT_75271
jgi|Trire2|104272|fgenesh5_pg.C_scaffold_3000227	104272	fgenesh5_pg.C_scaffold_3000227	2.50769	5.68707	3.36516	2.40343e-39	6.7698e-38	up in ∆ypr2		104272	TRIRE2_104272	3	701712	701829	6	226	-	-	-	-	-	-	-	-	-	-	-	unknown protein	-	-	-	-	-	-	-	-	-	-	-	TRIREDRAFT_104272
jgi|Trire2|104277|fgenesh5_pg.C_scaffold_3000232	104277	fgenesh5_pg.C_scaffold_3000232	2.88066	7.36486	3.9981	1.61574e-48	5.88854e-47	up in ∆ypr2		104277	TRIRE2_104277	3	718756	719283	6	231	-	-	-	-	-	-	-	-	\N	cell wall protein	Distantly related to A. niger CwpA. Putative cell wall protein.	cell wall protein, distantly related to A. niger CwpA.	-	-	-	-	-	-	-	-	-	-	-	TRIREDRAFT_104277
jgi|Trire2|104304|fgenesh5_pg.C_scaffold_3000259	104304	fgenesh5_pg.C_scaffold_3000259	1.83574	3.56955	0.663198	3.85537e-07	1.68583e-06	up in ∆ypr2		104304	TRIRE2_104304	3	807572	808327	6	258	-	-	-	-	-	-	-	-	-	-	-	unknown protein	-	-	-	-	-	-	-	-	-	-	-	TRIREDRAFT_104304
jgi|Trire2|72627|kg2.C_scaffold_3000062	72627	kg2.C_scaffold_3000062	1.11274	2.16256	2.72241	3.82756e-06	1.47228e-05	up in ∆ypr2		72627	TRIRE2_72627	3	850656	851369	6	275	Heterotrimeric G-protein pathway	0	GPCRs	7-TM receptor	V (cAMP receptor-like, Dicty_CAR domain)	83166	67397	0	\N	G-protein coupled receptor protein	hypothetical G-protein coupled receptor protein, family 2, secretin like, possibly involved in signal transduction	GPCR, secretin like	-	-	-	-	-	-	-	-	-	-	-	TRIREDRAFT_72627
jgi|Trire2|104334|fgenesh5_pg.C_scaffold_3000289	104334	fgenesh5_pg.C_scaffold_3000289	1.45601	2.74349	5.13582	3.01983e-38	8.17094e-37	up in ∆ypr2		104334	TRIRE2_104334	3	915707	916921	6	288	-	-	-	-	-	-	-	-	-	-	-	unknown protein	NCU09030	0	0	-	-	-	-	-	-	-	-	TRIREDRAFT_104334
jgi|Trire2|72632|kg2.C_scaffold_3000067	72632	kg2.C_scaffold_3000067	2.1565	4.45832	4.26004	1.38805e-34	3.24448e-33	up in ∆ypr2		72632	TRIRE2_72632	3	923199	923303	6	292	CAZymes	agl1	Glycoside hydrolase	Glycoside hydrolase family27	a-galactosidase AGL1 (GenBank acc no CAA93244)	51401	76590	0	\N	Glycoside Hydrolase Family 27	a-galactosidase 1 (EC 3.2.1.22);identical to CAA93244.1	GH27 ?-galactosidase AGL1	-	-	-	ANID_07624	1773	49040	50812	+	alpha-galactosidase 1	IV	PF02065.11	TRIREDRAFT_72632
jgi|Trire2|75361|estExt_GeneWisePlus.C_30509	75361	estExt_GeneWisePlus.C_30509	1.05675	2.08024	5.85952	5.91316e-19	6.63299e-18	up in ∆ypr2		75361	TRIRE2_75361	3	925587	926591	6	293	-	-	-	-	-	-	-	-	-	-	-	unknown protein	-	-	-	-	-	-	-	-	-	-	-	TRIREDRAFT_75361
jgi|Trire2|75383|estExt_GeneWisePlus.C_30561	75383	estExt_GeneWisePlus.C_30561	1.39527	2.63037	8.47973	1.71776e-21	2.21646e-20	up in ∆ypr2		75383	TRIRE2_75383	3	1020319	1021413	6	319	-	-	-	-	-	-	-	-	-	-	-	short chain dehydrogenase/reductase	NCU03893	0	0	-	-	-	-	-	-	-	-	TRIREDRAFT_75383
jgi|Trire2|104377|fgenesh5_pg.C_scaffold_3000332	104377	fgenesh5_pg.C_scaffold_3000332	1.87058	3.65679	2.467	8.67559e-17	8.64558e-16	up in ∆ypr2		104377	TRIRE2_104377	3	1065739	1067583	6	329	-	-	-	-	-	-	-	-	-	-	-	unknown protein	-	-	-	-	-	-	-	-	-	-	-	TRIREDRAFT_104377
jgi|Trire2|104380|fgenesh5_pg.C_scaffold_3000335	104380	fgenesh5_pg.C_scaffold_3000335	2.62229	6.15727	-0.0959257	1.48441e-06	6.06049e-06	up in ∆ypr2		104380	TRIRE2_104380	3	1073195	1073773	6	332	Transcription factors	0	Zn2Cys6	0	hypothetical protein	0	210335	YML099C	-	-	-	Zn2Cys6 transcriptional regulator	-	-	-	ANID_01649	1307	162171	163477	-	conserved hypothetical protein	VII	0	TRIREDRAFT_104380
jgi|Trire2|75394|estExt_GeneWisePlus.C_30591	75394	estExt_GeneWisePlus.C_30591	2.01716	4.04787	6.53725	9.91223e-17	9.83403e-16	up in ∆ypr2		75394	TRIRE2_75394	3	1091722	1092384	6	338	-	-	-	-	-	-	-	-	-	-	-	unknown protein	NCU07285	0	0	-	-	-	-	-	-	-	-	TRIREDRAFT_75394
jgi|Trire2|45523|estExt_Genewise1.C_30656	45523	estExt_Genewise1.C_30656	1.17102	2.25171	4.99794	1.08721e-25	1.71212e-24	up in ∆ypr2		45523	TRIRE2_45523	3	1158045	1158314	6	358	-	-	-	-	-	-	-	-	-	-	-	MFS permease	NCU04418	0	0	-	-	-	-	-	-	-	-	TRIREDRAFT_45523
jgi|Trire2|104419|fgenesh5_pg.C_scaffold_3000374	104419	fgenesh5_pg.C_scaffold_3000374	1.36002	2.56689	2.29804	1.27244e-08	6.67937e-08	up in ∆ypr2		104419	TRIRE2_104419	3	1189723	1190057	6	369	-	-	-	-	-	-	-	-	-	-	-	orphan protein, secreted	-	-	-	-	-	-	-	-	-	-	-	TRIREDRAFT_104419
jgi|Trire2|104438|fgenesh5_pg.C_scaffold_3000393	104438	fgenesh5_pg.C_scaffold_3000393	1.38859	2.61822	1.30416	9.58671e-07	3.99812e-06	up in ∆ypr2		104438	TRIRE2_104438	3	1271069	1271105	6	388	-	-	-	-	-	-	-	-	-	-	-	FAD-binding, oxidoreductase	-	-	-	-	-	-	-	-	-	-	-	TRIREDRAFT_104438
jgi|Trire2|45598|estExt_Genewise1.C_30787	45598	estExt_Genewise1.C_30787	1.41823	2.67258	7.04836	6.17759e-40	1.7909e-38	up in ∆ypr2		45598	TRIRE2_45598	3	1424045	1424133	6	430	-	-	-	-	-	-	-	-	-	-	-	unknown protein	NCU08337	0	0	ANID_01127	1608	252029	253636	-	conserved hypothetical protein	VIII	0	TRIREDRAFT_45598
jgi|Trire2|2687|fgenesh1_pm.C_scaffold_3000200	2687	fgenesh1_pm.C_scaffold_3000200	2.08191	4.23368	6.93645	5.28741e-21	6.6215e-20	up in ∆ypr2		2687	TRIRE2_2687	3	1436245	1438419	6	434	heat shock proteins	0	HSP104/Clp family	0	hypothetical hsp78 , related to S. cerevisiae HSP78p and to N. crassa heat shock protein78	157172	80583	YDR258C	-	-	-	AAA ATPase/HSP104	NCU02630	hsp78	0	ANID_01163	2679	358158	360836	+	heat shock protein 78	VIII	PF07728.7,PF10431.1,PF00004.22,PF07724.6,PF07728.6,PF00004.21,PF07724.7,PF10431.2,PF00158.19	TRIREDRAFT_2687
jgi|Trire2|120489|estExt_fgenesh5_pg.C_30473	120489	estExt_fgenesh5_pg.C_30473	1.13792	2.20063	5.57564	1.27834e-27	2.1783e-26	up in ∆ypr2		120489	TRIRE2_120489	3	1617504	1617530	6	479	-	-	-	-	-	-	-	-	-	-	-	unknown protein	-	-	-	-	-	-	-	-	-	-	-	TRIREDRAFT_120489
jgi|Trire2|45652|estExt_Genewise1.C_30910	45652	estExt_Genewise1.C_30910	1.5237	2.87528	1.95198	7.30554e-10	4.35746e-09	up in ∆ypr2		45652	TRIRE2_45652	3	1621783	1621783	6	481	protein kinases	cbk1	AGC kinase	0	AGC type kinase related to Aspergillus nidulans CBK1	181677	123748	YNL161W	-	-	-	Protein kinase	NCU03242	stk-21	0	ANID_10485	2912	5702	8613	-	serine/threonine-protein kinase cbk1	II	PF00069.17,PF07714.10,PF00069.18	TRIREDRAFT_45652
jgi|Trire2|2721|fgenesh1_pm.C_scaffold_3000234	2721	fgenesh1_pm.C_scaffold_3000234	1.13622	2.19804	6.19402	1.16897e-16	1.15334e-15	up in ∆ypr2		2721	TRIRE2_2721	3	1650042	1650294	6	492	-	-	-	-	-	-	-	-	-	-	-	unknown protein	NCU03285	0	0	ANID_10349	1931	343448	345378	-	predicted protein	VI	PF01480.10,PF01480.9	TRIREDRAFT_2721
jgi|Trire2|104557|fgenesh5_pg.C_scaffold_3000512	104557	fgenesh5_pg.C_scaffold_3000512	2.51262	5.70656	2.32078	9.10986e-25	1.36939e-23	up in ∆ypr2		104557	TRIRE2_104557	3	1696725	1697654	6	507	-	-	-	-	-	-	-	-	-	-	-	short-chain dehydrogenase/reductase	-	-	-	-	-	-	-	-	-	-	-	TRIREDRAFT_104557
jgi|Trire2|104585|fgenesh5_pg.C_scaffold_3000540	104585	fgenesh5_pg.C_scaffold_3000540	1.63359	3.10284	-0.435473	0.00149563	0.00372301	up in ∆ypr2		104585	TRIRE2_104585	3	1806115	1806759	6	533	-	-	-	-	-	-	-	-	-	-	-	unknown protein	-	-	-	-	-	-	-	-	-	-	-	TRIREDRAFT_104585
jgi|Trire2|45717|estExt_Genewise1.C_31037	45717	estExt_Genewise1.C_31037	1.76734	3.40425	7.07958	7.05801e-43	2.22689e-41	up in ∆ypr2		45717	TRIRE2_45717	3	1838318	1838907	6	545	CAZymes	mds1	Glycoside hydrolase	Glycoside hydrolase family47	Mannosidase-like protein EDEM2	127412	78530	YJR131W	\N	Glycoside Hydrolase Family 47	a-1,2-mannosidase (EC 3.2.1.113)	GH47 ?-1,2-mannosidase	NCU07067	gh47-5	0	ANID_00787	1747	7940	9686	-	alpha-1,2-mannosidase	VIII	PF01532.13,PF01532.12	TRIREDRAFT_45717
jgi|Trire2|104599|fgenesh5_pg.C_scaffold_3000554	104599	fgenesh5_pg.C_scaffold_3000554	2.18691	4.5533	3.19155	5.85895e-21	7.30651e-20	up in ∆ypr2		104599	TRIRE2_104599	3	1845102	1845257	6	547	-	-	-	-	-	-	-	-	-	-	-	Mandelate racemase/muconate lactonizing enzyme	NCU07064	0	0	ANID_06035	1627	9419	11045	-	mandelate racemase/muconate lactonizing enzyme family protein	I	PF01188.13,PF01188.14,PF02746.9	TRIREDRAFT_104599
jgi|Trire2|65333|e_gw1.16.52.1	65333	e_gw1.16.52.1	1.86742	3.64878	6.09038	4.85018e-59	2.36652e-57	up in ∆ypr2		65333	TRIRE2_65333	16	101080	101216	6	610	CAZymes	0	Glycoside hydrolase	Glycoside hydrolase family15	candidate a-glycosidase distantly related to glucoamylase and a,a-trehalase	226203	146304	0	\N	Glycoside Hydrolase Family 15	candidate a-glycosidase;possible trehalase	GH15 alpha-glycosidase, possible trehalase	NCU03098	0	0	-	-	-	-	-	-	-	-	TRIREDRAFT_65333
jgi|Trire2|65315|e_gw1.16.440.1	65315	e_gw1.16.440.1	1.48519	2.79954	5.85482	9.96248e-40	2.86029e-38	up in ∆ypr2		65315	TRIRE2_65315	16	142705	142824	6	623	Transcription factors	0	bZIP	0	conserved hypothetical protein	298410	208681	YML007W	-	-	-	bZIP transcription factor	NCU04058	0	0	ANID_04324	1039	68916	69954	+	conserved hypothetical protein	III	0	TRIREDRAFT_65315
jgi|Trire2|33387|gw1.16.240.1	33387	gw1.16.240.1	1.21702	2.32466	2.94462	6.56296e-11	4.36667e-10	up in ∆ypr2		33387	TRIRE2_33387	16	218556	218766	6	636	-	-	-	-	-	-	-	-	-	-	-	GCN5-related N-acetyltransferase, putative	NCU04039	0	0	ANID_05330	561	199078	199638	-	conserved hypothetical protein	V	PF00583.17	TRIREDRAFT_33387
jgi|Trire2|109538|fgenesh5_pg.C_scaffold_16000122	109538	fgenesh5_pg.C_scaffold_16000122	3.83423	14.2633	3.45142	4.13955e-64	2.28161e-62	up in ∆ypr2		109538	TRIRE2_109538	16	379565	380367	6	678	Transcription factors	0	bZIP	0	related to activating transcription factor 2, binds to the cAMP responsive region (CRE)	41041	57711	YER045C	\N	\N	Activating transcription factor 2 binds to the cAMP responsive region (CRE; belongs to the basic-leucine zipper (bZIP) transcription factors, these proteins contain a basic region mediating sequence-specific DNA-binding followed by a leucine zipper region required for dimerization	BZIP transcriptional regulator, related to activating transcription factor 2, binds to the cAMP responsive region (CRE)	NCU01459	ts	asl-2	-	-	-	-	-	-	-	-	TRIREDRAFT_109538
jgi|Trire2|80007|estExt_GeneWisePlus.C_160302	80007	estExt_GeneWisePlus.C_160302	1.07761	2.11054	6.09459	4.04289e-29	7.42776e-28	up in ∆ypr2		80007	TRIRE2_80007	16	545399	545409	6	709	-	-	-	-	-	-	-	-	-	-	-	Like Rad54; interacts with Dmc1	NCU05988	0	0	ANID_05598	1386	84417	85802	-	ubiquinol-cytochrome c reductase complex protein	V	PF10349.1,PF10349.2	TRIREDRAFT_80007
jgi|Trire2|65583|e_gw1.16.84.1	65583	e_gw1.16.84.1	3.00468	8.02599	3.15517	9.63542e-05	0.000296876	up in ∆ypr2		65583	TRIRE2_65583	16	640304	640504	6	738	-	-	-	-	-	-	-	-	-	-	-	MFS permease	-	-	-	ANID_10036	1765	33499	35263	-	conserved hypothetical protein	VIII	PF07690.9,PF07690.8,PF00083.17	TRIREDRAFT_65583
jgi|Trire2|4901|fgenesh1_pm.C_scaffold_16000097	4901	fgenesh1_pm.C_scaffold_16000097	1.04241	2.05967	4.25026	2.96165e-10	1.83516e-09	up in ∆ypr2		4901	TRIRE2_4901	16	667466	667732	6	749	-	-	-	-	-	-	-	-	-	-	-	cytochrome c oxidase assembly protein COX16, putative	NCU00641	0	0	ANID_10871	479	38753	39231	+	cytochrome c oxidase-assembly factor cox16	IV	0	TRIREDRAFT_4901
jgi|Trire2|122972|estExt_fgenesh5_pg.C_160247	122972	estExt_fgenesh5_pg.C_160247	1.15626	2.2288	5.07005	2.35117e-22	3.16646e-21	up in ∆ypr2		122972	TRIRE2_122972	16	794646	794906	6	786	Calcium signaling	0	Calcium ATPases	0	hypothetical Cation transporting ATPase, putative Ca2+ pump, related to S. cerevisiae Ena2p and to N. crassa ena-1	128196	57750	YDR039C	\N	Cation transporting ATPase	Cation transporting ATPase	Cation transporting ATPase	NCU05046	ena-1	0	ANID_06642	3819	208745	212563	+	sodium P-type ATPase	I	PF00689.14,PF00702.19,TIGR01523,PF00702.18,PF00690.19,PF00122.12,PF00690.18,PF00689.13,PF00122.13,TIGR01494	TRIREDRAFT_122972
jgi|Trire2|4921|fgenesh1_pm.C_scaffold_16000117	4921	fgenesh1_pm.C_scaffold_16000117	1.54569	2.91944	5.30135	8.67478e-43	2.71779e-41	up in ∆ypr2		4921	TRIRE2_4921	16	815736	816611	6	788	Transcription factors	0	C2H2 zinc finger	0	related to C2H2 conidiation transcription factor FlbC	41152	57749	YPR013C	-	-	-	C2H2 transcriptional regulator	NCU03184	0	0	ANID_08741	990	14830	15819	+	conserved hypothetical protein	III	PF00096.18	TRIREDRAFT_4921
jgi|Trire2|123608|estExt_fgenesh5_pg.C_240035	123608	estExt_fgenesh5_pg.C_240035	1.29771	2.45838	3.70455	1.3138e-15	1.23095e-14	up in ∆ypr2		123608	TRIRE2_123608	24	97868	98293	6	818	-	-	-	-	-	-	-	-	-	-	-	orphan protein	-	-	-	-	-	-	-	-	-	-	-	TRIREDRAFT_123608
jgi|Trire2|111050|fgenesh5_pg.C_scaffold_24000038	111050	fgenesh5_pg.C_scaffold_24000038	3.49991	11.313	-1.6739	0.000982519	0.00252426	up in ∆ypr2		111050	TRIRE2_111050	24	116353	116660	6	821	-	-	-	-	-	-	-	-	-	-	-	orphan protein	-	-	-	-	-	-	-	-	-	-	-	TRIREDRAFT_111050
jgi|Trire2|111053|fgenesh5_pg.C_scaffold_24000041	111053	fgenesh5_pg.C_scaffold_24000041	2.73096	6.63898	5.7061	1.17855e-106	1.61897e-104	up in ∆ypr2		111053	TRIRE2_111053	24	193442	195040	6	823	-	-	-	-	-	-	-	-	-	-	-	retrograde regulation protein 2	-	-	-	ANID_10492	1801	79092	80892	-	retrograde regulation protein 2	II	PF02541.8,PF02541.9	TRIREDRAFT_111053
jgi|Trire2|68169|e_gw1.24.238.1	68169	e_gw1.24.238.1	2.99054	7.94769	2.05326	2.91913e-28	5.1716e-27	up in ∆ypr2		68169	TRIRE2_68169	24	196226	196501	6	824	Calcium signaling	0	Calcium transporters	0	hypothetical Ca2+ transporter; putative Ca2+/proton exchanger, related to S. cerevisiae Vcx1p	88800	43618	YDL128W	\N	Ca2+ transporter	hypothetical Ca2+ transporter	Calcium transporter	-	-	-	-	-	-	-	-	-	-	-	TRIREDRAFT_68169
jgi|Trire2|111059|fgenesh5_pg.C_scaffold_24000047	111059	fgenesh5_pg.C_scaffold_24000047	1.07263	2.10326	2.68823	9.96793e-08	4.71668e-07	up in ∆ypr2		111059	TRIRE2_111059	24	205882	206349	6	827	-	-	-	-	-	-	-	-	-	-	-	unknown protein	-	-	-	-	-	-	-	-	-	-	-	TRIREDRAFT_111059
jgi|Trire2|68204|e_gw1.24.174.1	68204	e_gw1.24.174.1	1.0222	2.03101	5.03966	4.61393e-14	3.94237e-13	up in ∆ypr2		68204	TRIRE2_68204	24	269353	269863	6	848	-	-	-	-	-	-	-	-	\N	non-ribosomal peptide synthetase	candidate non-ribosomal peptide synthetase	NRPS	NCU07231	0	0	ANID_09129	3367	212269	215635	+	non-ribosomal peptide synthetase	IV	PF00501.21,PF00501.20,TIGR01733	TRIREDRAFT_68204
jgi|Trire2|111094|fgenesh5_pg.C_scaffold_24000082	111094	fgenesh5_pg.C_scaffold_24000082	4.25572	19.1028	2.23365	7.60881e-44	2.45267e-42	up in ∆ypr2		111094	TRIRE2_111094	24	293398	294325	6	854	CAZymes	0	Carbohydrate binding module	Carbohydrate binding module family13	0	-	69718	0	\N	Carbohydrate-Binding Module Family 13	candidate carbohydrate-binding protein	CBM 13	-	-	-	-	-	-	-	-	-	-	-	TRIREDRAFT_111094
jgi|Trire2|123639|estExt_fgenesh5_pg.C_240095	123639	estExt_fgenesh5_pg.C_240095	5.9288	60.918	-1.72997	0.000105824	0.000323597	up in ∆ypr2		123639	TRIRE2_123639	24	354015	355364	6	866	CAZymes	0	Glycoside hydrolase	Glycoside hydrolase family64	candidate b-glycosidase distantly related to b-1,3-glucanase	41194	50439	0	\N	Glycoside Hydrolase Family 64	candidate b-1,3-glucanase	GH64 endo-1,3-?-glucanase	-	-	-	-	-	-	-	-	-	-	-	TRIREDRAFT_123639
jgi|Trire2|111119|fgenesh5_pg.C_scaffold_24000107	111119	fgenesh5_pg.C_scaffold_24000107	1.33231	2.51806	0.469578	0.00151131	0.00375997	up in ∆ypr2	33	111119	TRIRE2_111119	24	386595	386784	6	879	Transcription factors	0	bZIP	0	predicted protein	88640	0	YOL028C	\N	AP1-like basic-leucine zipper transcription factor	Basic-leucine zipper (bZIP) transcription factor, possibly related to AP1	bZI) transcription factor, possibly related to AP1	-	-	-	-	-	-	-	-	-	-	-	TRIREDRAFT_111119
jgi|Trire2|68161|e_gw1.24.270.1	68161	e_gw1.24.270.1	1.1538	2.22499	0.816817	0.000416579	0.00114556	up in ∆ypr2	33	68161	TRIRE2_68161	24	388233	389111	6	880	CAZymes	0	Carbohydrate esterase	Carbohydrate esterase family10	0	-	50483	YGR292W	-	-	-	CE10 Arylacetamide deacetylase	NCU09409	0	0	ANID_05501	963	392816	393778	+	alpha/beta hydrolase fold protein	V	PF00326.14,PF07859.5,PF07859.6	TRIREDRAFT_68161
jgi|Trire2|51654|estExt_Genewise1.C_240250	51654	estExt_Genewise1.C_240250	1.32007	2.49677	1.88432	1.01819e-07	4.81026e-07	up in ∆ypr2	33	51654	TRIRE2_51654	24	394782	395372	6	883	-	-	-	-	-	-	-	-	-	-	-	unknown protein	-	-	-	-	-	-	-	-	-	-	-	TRIREDRAFT_51654
jgi|Trire2|111124|fgenesh5_pg.C_scaffold_24000112	111124	fgenesh5_pg.C_scaffold_24000112	1.00176	2.00244	2.3256	1.53808e-06	6.27102e-06	up in ∆ypr2	33	111124	TRIRE2_111124	24	395851	395878	6	884	-	-	-	-	-	-	-	-	-	-	-	unknown protein	-	-	-	ANID_05319	1077	171837	172913	+	conserved hypothetical protein	V	0	TRIREDRAFT_111124
jgi|Trire2|23184|estExt_fgenesh1_pm.C_240047	23184	estExt_fgenesh1_pm.C_240047	1.04288	2.06033	6.7172	2.17858e-24	3.22596e-23	up in ∆ypr2	33	23184	TRIRE2_23184	24	398079	398103	6	885	-	-	-	-	-	-	-	-	\N	\N	COG0473, LeuB, Isocitrate/isopropylmalate dehydrogenase	Isocitrate/isopropylmalate dehydrogenase	NCU02954	lys-7	0	ANID_05206	1329	153353	154681	+	isocitrate dehydrogenase LysB	V	PF00180.12,PF00180.13	TRIREDRAFT_23184
jgi|Trire2|111126|fgenesh5_pg.C_scaffold_24000114	111126	fgenesh5_pg.C_scaffold_24000114	2.27332	4.83433	1.06747	4.50097e-10	2.75268e-09	up in ∆ypr2	33	111126	TRIRE2_111126	24	399811	400400	6	886	Chromatin and histone modification	0	Snf2 family proteins	Swr-like	ris1 related	162130	123065	YOR191W	-	-	-	Snf2 family protein, Swr-like	NCU04445	0	0	-	-	-	-	-	-	-	-	TRIREDRAFT_111126
jgi|Trire2|81410|estExt_GeneWisePlus.C_240265	81410	estExt_GeneWisePlus.C_240265	1.61619	3.06565	7.82989	1.07449e-33	2.42889e-32	up in ∆ypr2		81410	TRIRE2_81410	24	421854	422045	6	893	-	-	-	-	-	-	-	-	-	-	-	unknown protein	NCU04343	egt-1	0	-	-	-	-	-	-	-	-	TRIREDRAFT_81410
jgi|Trire2|111138|fgenesh5_pg.C_scaffold_24000126	111138	fgenesh5_pg.C_scaffold_24000126	1.19039	2.28215	3.77815	1.22764e-10	7.8974e-10	up in ∆ypr2		111138	TRIRE2_111138	24	433646	433784	6	897	CAZymes	0	Glycoside hydrolase	Glycoside hydrolase family95	candidate a-glycosidase related to a-1,2-L-fucosidase	219941	69649	0	-	-	-	candidate a-glycosidase related to a-1,2-L-fucosidase	-	-	-	-	-	-	-	-	-	-	-	TRIREDRAFT_111138
jgi|Trire2|81420|estExt_GeneWisePlus.C_240280	81420	estExt_GeneWisePlus.C_240280	1.73583	3.33071	1.82963	1.04762e-10	6.78332e-10	up in ∆ypr2		81420	TRIRE2_81420	24	469582	469810	6	907	-	-	-	-	-	-	-	-	-	-	-	Argonaute siRNA chaperone (ARC) complex subunit	NCU06316	0	0	-	-	-	-	-	-	-	-	TRIREDRAFT_81420
jgi|Trire2|81430|estExt_GeneWisePlus.C_240293	81430	estExt_GeneWisePlus.C_240293	1.17798	2.26259	9.52975	1.49188e-18	1.63448e-17	up in ∆ypr2		81430	TRIRE2_81430	24	486516	486961	6	912	Calcium signaling	0	Calcium ATPases	0	hypothetical Cation transporting ATPase, putative Ca2+ pump; related to the potassium/sodium P-type ATPase ena2 of N. crassa (57% aa identity), to ENA6 of S. cerevisiae (ACI43585, 40% aa identity), which is involved in Na+ and Li+ exporting system in the plasma membrane, and to the plasma membrane Na+ ATPase of Debaryomyces hansenii (41% aa identity)., related to S. cerevisiae Ena1p and to N. cra…	219964	59192	YDR040C	\N	Cation transporting ATPase	Cation transporting ATPase	Cation transporting ATPase	NCU08147	ph7	ena-2	ANID_10982	3458	187281	190738	-	potassium/sodium P-type ATPase	IV	PF00689.14,PF00702.19,TIGR01523,PF00702.18,PF08282.5,PF00690.19,PF00122.12,PF00690.18,PF00689.13,PF00122.13,TIGR01494	TRIREDRAFT_81430
jgi|Trire2|69605|e_gw1.29.65.1	69605	e_gw1.29.65.1	1.49474	2.81813	1.76396	1.34757e-07	6.25714e-07	up in ∆ypr2		69605	TRIRE2_69605	29	48783	49841	6	927	-	-	-	-	-	-	-	-	\N	Cystathionine beta-lyase/cystathionine gamma-synthase	COG0626, MetC, Cystathionine beta-lyases/cystathionine gamma-synthases	Cystathionine beta-lyases/cystathionine gamma-synthases	-	-	-	ANID_11168	1247	255351	256597	-	cystathionine gamma-synthase	IV	PF01053.13,PF01053.12	TRIREDRAFT_69605
jgi|Trire2|69537|e_gw1.29.211.1	69537	e_gw1.29.211.1	2.88665	7.3955	2.55847	4.10069e-29	7.51849e-28	up in ∆ypr2		69537	TRIRE2_69537	29	53382	54167	6	929	-	-	-	-	-	-	-	-	-	-	-	unknown protein, contains F-box and WD repeat	-	-	-	ANID_00386	918	19981	20898	-	conserved hypothetical protein	VIII	0	TRIREDRAFT_69537
jgi|Trire2|123962|estExt_fgenesh5_pg.C_290039	123962	estExt_fgenesh5_pg.C_290039	3.30922	9.91231	7.46358	8.65633e-24	1.24867e-22	up in ∆ypr2		123962	TRIRE2_123962	29	106649	106664	6	946	-	-	-	-	-	-	-	-	-	-	-	orphan protein	-	-	-	-	-	-	-	-	-	-	-	TRIREDRAFT_123962
jgi|Trire2|69479|e_gw1.29.61.1	69479	e_gw1.29.61.1	1.24937	2.37738	4.35407	6.10383e-16	5.81655e-15	up in ∆ypr2		69479	TRIRE2_69479	29	198693	199922	6	970	-	-	-	-	-	-	-	-	-	-	-	unknown protein	-	-	-	-	-	-	-	-	-	-	-	TRIREDRAFT_69479
jgi|Trire2|123979|estExt_fgenesh5_pg.C_290084	123979	estExt_fgenesh5_pg.C_290084	1.5619	2.95242	2.91906	5.55387e-08	2.71283e-07	up in ∆ypr2		123979	TRIRE2_123979	29	261589	261741	6	986	Sulfur metabolism	0	sulfur assimilation	EC number 1.14.11.17	taurine dioxygenase	139690	77829	YLL057C	-	-	-	taurine dioxigenase	-	-	-	ANID_02200	1292	27516	28807	+	alpha-ketoglutarate-dependent taurine dioxygenase	VII	PF02668.8,PF02668.9	TRIREDRAFT_123979
jgi|Trire2|69574|e_gw1.29.54.1	69574	e_gw1.29.54.1	2.10023	4.28779	3.83924	9.06226e-33	1.94981e-31	up in ∆ypr2		69574	TRIRE2_69574	29	263357	263560	6	987	-	-	-	-	-	-	-	-	-	-	-	MFS permease	-	-	-	ANID_00382	1595	9805	11399	-	conserved hypothetical protein	VIII	PF07690.9,PF07690.8	TRIREDRAFT_69574
jgi|Trire2|111818|fgenesh5_pg.C_scaffold_29000088	111818	fgenesh5_pg.C_scaffold_29000088	2.04724	4.13315	0.170415	3.82869e-06	1.47228e-05	up in ∆ypr2		111818	TRIRE2_111818	29	268986	269908	6	990	-	-	-	-	-	-	-	-	-	-	-	aspartyl protease	-	-	-	-	-	-	-	-	-	-	-	TRIREDRAFT_111818
jgi|Trire2|82032|estExt_GeneWisePlus.C_290155	82032	estExt_GeneWisePlus.C_290155	1.91567	3.77289	7.40283	6.31509e-10	3.79969e-09	up in ∆ypr2		82032	TRIRE2_82032	29	274472	274577	6	992	-	-	-	-	-	-	-	-	-	-	-	unknown protein	NCU07352	0	0	ANID_04051	1079	264824	265902	-	conserved hypothetical protein	II	0	TRIREDRAFT_82032
jgi|Trire2|111832|fgenesh5_pg.C_scaffold_29000102	111832	fgenesh5_pg.C_scaffold_29000102	1.23558	2.35475	4.71862	1.88397e-20	2.29183e-19	up in ∆ypr2	34	111832	TRIRE2_111832	29	304276	304627	6	1002	-	-	-	-	-	-	-	-	-	-	-	Isoflavone reductase superfamily protein	NCU07167	0	0	ANID_08968	1092	18797	19888	-	isoflavone reductase	VII	PF05368.6,PF01370.14,PF05368.5	TRIREDRAFT_111832
jgi|Trire2|82041|estExt_GeneWisePlus.C_290179	82041	estExt_GeneWisePlus.C_290179	2.04883	4.1377	4.37326	1.31347e-33	2.95414e-32	up in ∆ypr2	34	82041	TRIRE2_82041	29	308932	309266	6	1004	Heterotrimeric G-protein pathway	0	GPCRs	7-TM receptor	PTH11-like	220212	192678	0	-	-	-	PTH11 GPCR	NCU05829	0	0	-	-	-	-	-	-	-	-	TRIREDRAFT_82041
jgi|Trire2|5787|fgenesh1_pm.C_scaffold_29000031	5787	fgenesh1_pm.C_scaffold_29000031	2.6329	6.20272	2.37935	8.2081e-17	8.198e-16	up in ∆ypr2	34	5787	TRIRE2_5787	29	311440	311566	6	1005	-	-	-	-	-	-	-	-	\N	conserved hypothetical protein	COG0833, LysP, Amino acid transporters	Amino acid transporters	-	-	-	-	-	-	-	-	-	-	-	TRIREDRAFT_5787
jgi|Trire2|111838|fgenesh5_pg.C_scaffold_29000108	111838	fgenesh5_pg.C_scaffold_29000108	1.70856	3.26834	1.49155	4.27699e-07	1.86017e-06	up in ∆ypr2	34	111838	TRIRE2_111838	29	315964	315992	6	1007	-	-	-	-	-	-	-	-	-	-	-	serin endopeptidase	-	-	-	-	-	-	-	-	-	-	-	TRIREDRAFT_111838
jgi|Trire2|5789|fgenesh1_pm.C_scaffold_29000033	5789	fgenesh1_pm.C_scaffold_29000033	2.36211	5.14123	3.89635	1.43056e-39	4.08098e-38	up in ∆ypr2	34	5789	TRIRE2_5789	29	322659	322815	6	1010	Secondary metabolism	0	Cytochrome P450	p450 superfamily (cI12078)	0	0	0	0	-	-	-	Cytochrome P450 CYP3/CYP5/CYP6/CYP9 subfamilies	-	-	-	-	-	-	-	-	-	-	-	TRIREDRAFT_5789
jgi|Trire2|69613|e_gw1.29.209.1	69613	e_gw1.29.209.1	1.75957	3.38597	-0.732429	0.00247047	0.00585736	up in ∆ypr2		69613	TRIRE2_69613	29	375501	376075	6	1026	-	-	-	-	-	-	-	-	-	-	-	unknown protein (Duf227)	NCU09776	0	0	-	-	-	-	-	-	-	-	TRIREDRAFT_69613
jgi|Trire2|64959|e_gw1.15.57.1	64959	e_gw1.15.57.1	2.11314	4.32631	6.47736	1.52697e-87	1.53194e-85	up in ∆ypr2	35	64959	TRIRE2_64959	15	15618	16994	7	19	-	-	-	-	-	-	-	-	-	-	-	phosphatidyl synthase	NCU04924	cut-1	ovc	ANID_05564	1913	73103	75015	+	phosphatidyl synthase	V	TIGR01456,PF00702.18,TIGR01460	TRIREDRAFT_64959
jgi|Trire2|122778|estExt_fgenesh5_pg.C_150005	122778	estExt_fgenesh5_pg.C_150005	1.56342	2.95554	6.46591	4.50181e-50	1.73261e-48	up in ∆ypr2	35	122778	TRIRE2_122778	15	18400	19356	7	20	-	-	-	-	-	-	-	-	gld1	glycerol dehydrogenase	\N	short chain dehydrogenase/reductase	NCU04923	gcy-1	0	ANID_05563	1596	70646	72241	-	NADP(+)-dependent glycerol dehydrogenase	V	PF00248.14,PF00248.13	TRIREDRAFT_122778
jgi|Trire2|71817|kg2.C_scaffold_15000004	71817	kg2.C_scaffold_15000004	1.14095	2.20526	2.25461	0.00128142	0.00322396	up in ∆ypr2	35	71817	TRIRE2_71817	15	20480	20737	7	21	-	-	-	-	-	-	-	-	-	-	-	unknown protein	-	-	-	-	-	-	-	-	-	-	-	TRIREDRAFT_71817
jgi|Trire2|65117|e_gw1.15.173.1	65117	e_gw1.15.173.1	2.28305	4.86706	-0.514262	0.000112027	0.000340814	up in ∆ypr2		65117	TRIRE2_65117	15	36973	37308	7	27	-	-	-	-	-	-	-	-	-	-	-	ankyrin	-	-	-	-	-	-	-	-	-	-	-	TRIREDRAFT_65117
jgi|Trire2|71823|kg2.C_scaffold_15000010	71823	kg2.C_scaffold_15000010	2.08972	4.25667	0.202465	2.5064e-06	9.88062e-06	up in ∆ypr2		71823	TRIRE2_71823	15	52993	53044	7	33	Transcription factors	0	Zn2Cys6	0	conserved hypothetical protein	316880	204757	YIL130W	\N	fungal specific transcription factor domain-containing protein	This domain is found in a number of fungal transcription factors including transcriptional activator xlnR, yeast regulatory protein GAL4, and other transcription proteins regulating a variety of cellular and metabolic processes.	Zn2Cys6 transcriptional regulator	-	-	-	-	-	-	-	-	-	-	-	TRIREDRAFT_71823
jgi|Trire2|65097|e_gw1.15.326.1	65097	e_gw1.15.326.1	2.48113	5.58336	-0.564556	3.03064e-05	0.000100672	up in ∆ypr2		65097	TRIRE2_65097	15	59125	60081	7	35	-	-	-	-	-	-	-	-	-	-	-	Zinc-binding oxidoreductase	-	-	-	-	-	-	-	-	-	-	-	TRIREDRAFT_65097
jgi|Trire2|65039|e_gw1.15.304.1	65039	e_gw1.15.304.1	1.17045	2.25082	5.46032	1.21452e-28	2.18637e-27	up in ∆ypr2		65039	TRIRE2_65039	15	94737	95105	7	47	-	-	-	-	-	-	-	-	-	-	-	sexual development protein	-	-	-	ANID_02330	1122	164448	165569	+	late sexual development protein	VII	0	TRIREDRAFT_65039
jgi|Trire2|109235|fgenesh5_pg.C_scaffold_15000037	109235	fgenesh5_pg.C_scaffold_15000037	2.64858	6.27051	4.04199	1.87373e-29	3.50011e-28	up in ∆ypr2		109235	TRIRE2_109235	15	116709	117219	7	55	-	-	-	-	-	-	-	-	\N	Carbohydrate-Binding Module Family 18	distantly related to CBM18 modules	CBM 18	-	-	-	-	-	-	-	-	-	-	-	TRIREDRAFT_109235
jgi|Trire2|109276|fgenesh5_pg.C_scaffold_15000078	109276	fgenesh5_pg.C_scaffold_15000078	2.43894	5.42243	0.375865	8.74565e-09	4.67045e-08	up in ∆ypr2	36	109276	TRIRE2_109276	15	311158	311833	7	95	-	-	-	-	-	-	-	-	-	-	-	Tripeptidyl peptidase II	-	-	-	-	-	-	-	-	-	-	-	TRIREDRAFT_109276
jgi|Trire2|109277|fgenesh5_pg.C_scaffold_15000079	109277	fgenesh5_pg.C_scaffold_15000079	2.45229	5.47282	-0.589053	2.88147e-05	9.611e-05	up in ∆ypr2	36	109277	TRIRE2_109277	15	317883	317989	7	96	Transcription factors	0	Zn2Cys6	0	C6 transcription factor RosA-like, putative	46434	51004	YDR213W	-	-	-	Zn2Cys6 transcriptional regulator, RosA like	-	-	-	-	-	-	-	-	-	-	-	TRIREDRAFT_109277
jgi|Trire2|109278|fgenesh5_pg.C_scaffold_15000080	109278	fgenesh5_pg.C_scaffold_15000080	1.00513	2.00713	1.7889	3.57287e-05	0.000117677	up in ∆ypr2	36	109278	TRIRE2_109278	15	320513	321319	7	97	CAZymes	0	Glycoside hydrolase	Glycoside hydrolase family24	candidate b-glycosidase distantly related to lysozyme	-	47208	0	\N	Glycoside Hydrolase Family 24	related to phage lysozymes	GH24 lysozyme	-	-	-	ANID_02719	648	21836	22483	+	conserved hypothetical protein	VI	PF00959.12,PF00959.11	TRIREDRAFT_109278
jgi|Trire2|64922|e_gw1.15.374.1	64922	e_gw1.15.374.1	2.56085	5.90057	3.66113	3.83845e-37	1.00509e-35	up in ∆ypr2	36	64922	TRIRE2_64922	15	325296	325536	7	98	-	-	-	-	-	-	-	-	-	-	-	unknown protein, only present in Gibberella, Neurospora and Magnaporthe	NCU08155	0	0	-	-	-	-	-	-	-	-	TRIREDRAFT_64922
jgi|Trire2|65171|e_gw1.15.330.1	65171	e_gw1.15.330.1	1.59457	3.02005	2.11851	3.29013e-10	2.02744e-09	up in ∆ypr2	36	65171	TRIRE2_65171	15	326192	327121	7	99	-	-	-	-	-	-	-	-	-	-	-	unknown protein	NCU02116	0	0	ANID_01947	1065	421978	423042	-	metallo-beta-lactamase domain-containing protein	VII	PF00753.19,PF00753.20	TRIREDRAFT_65171
jgi|Trire2|109282|fgenesh5_pg.C_scaffold_15000084	109282	fgenesh5_pg.C_scaffold_15000084	2.3744	5.18519	1.9059	7.95954e-19	8.87275e-18	up in ∆ypr2		109282	TRIRE2_109282	15	329655	330386	7	101	-	-	-	-	-	-	-	-	-	-	-	unknown protein	-	-	-	-	-	-	-	-	-	-	-	TRIREDRAFT_109282
jgi|Trire2|65153|e_gw1.15.225.1	65153	e_gw1.15.225.1	1.52829	2.88445	5.59811	1.26844e-19	1.47473e-18	up in ∆ypr2		65153	TRIRE2_65153	15	372826	373103	7	109	Transport	0	Sugar transporter	transporter containing IPR003663 domain	0	154753	89841	YNR072W	-	-	-	MFS permease	NCU05585	0	0	ANID_03220	2285	22931	25215	-	MFS quinate transporter	VI	PF07690.9,TIGR00879,PF07690.8,PF00083.17,PF00083.16	TRIREDRAFT_65153
jgi|Trire2|109296|fgenesh5_pg.C_scaffold_15000098	109296	fgenesh5_pg.C_scaffold_15000098	1.98718	3.96463	3.74324	3.4957e-29	6.4357e-28	up in ∆ypr2		109296	TRIRE2_109296	15	392596	392947	7	115	-	-	-	-	-	-	-	-	-	-	-	unknown protein	NCU08095	0	0	ANID_07960	405	250973	251377	+	conserved hypothetical protein	II	0	TRIREDRAFT_109296
jgi|Trire2|109307|fgenesh5_pg.C_scaffold_15000109	109307	fgenesh5_pg.C_scaffold_15000109	2.16111	4.4726	1.40388	4.08778e-13	3.24443e-12	up in ∆ypr2		109307	TRIRE2_109307	15	424624	425094	7	126	-	-	-	-	-	-	-	-	-	-	-	unknown protein	-	-	-	-	-	-	-	-	-	-	-	TRIREDRAFT_109307
jgi|Trire2|65198|e_gw1.15.18.1	65198	e_gw1.15.18.1	1.47464	2.77914	3.21038	4.29677e-17	4.37966e-16	up in ∆ypr2		65198	TRIRE2_65198	15	431169	431365	7	129	-	-	-	-	-	-	-	-	\N	Adenosylmethionine-8-amino-7-oxononanoate aminotransferase-like protein	COG0161, BioA, Adenosylmethionine-8-amino-7-oxononanoate aminotransferase	BioA Adenosylmethionine--amino--oxononanoate aminotransferase	-	-	-	ANID_06644	2594	215355	217948	-	onanonoxo-7-onima-8-eninoihtemlysoneda	I	TIGR00347,PF00202.14	TRIREDRAFT_65198
jgi|Trire2|109321|fgenesh5_pg.C_scaffold_15000123	109321	fgenesh5_pg.C_scaffold_15000123	4.10943	17.2609	0.786201	4.113e-19	4.64285e-18	up in ∆ypr2		109321	TRIRE2_109321	15	458355	458622	7	140	-	-	-	-	-	-	-	-	-	-	-	unknown protein	-	-	-	-	-	-	-	-	-	-	-	TRIREDRAFT_109321
jgi|Trire2|40808|gw1.15.315.1	40808	gw1.15.315.1	2.44673	5.45179	1.13874	7.99618e-14	6.64167e-13	up in ∆ypr2		40808	TRIRE2_40808	15	591090	591970	7	172	-	-	-	-	-	-	-	-	-	-	-	short-chain dehydrogenase/reductase	NCU08406	0	0	-	-	-	-	-	-	-	-	TRIREDRAFT_40808
jgi|Trire2|64900|e_gw1.15.43.1	64900	e_gw1.15.43.1	4.81699	28.1876	3.53094	1.86044e-97	2.18577e-95	up in ∆ypr2		64900	TRIRE2_64900	15	682207	682597	7	194	Secondary metabolism	0	Cytochrome P450	p450 superfamily (cI12078)	0	0	0	0	-	-	-	Cytochrome P450 CYP2 subfamily	-	-	-	-	-	-	-	-	-	-	-	TRIREDRAFT_64900
jgi|Trire2|122820|estExt_fgenesh5_pg.C_150175	122820	estExt_fgenesh5_pg.C_150175	3.94723	15.4253	2.32289	6.15062e-45	2.04159e-43	up in ∆ypr2		122820	TRIRE2_122820	15	686225	686301	7	195	-	-	-	-	-	-	-	-	\N	Aspartate/tyrosine/aromatic aminotransferase	COG0436	Kynurenine aminotransferase, glutamine transaminase K	-	-	-	-	-	-	-	-	-	-	-	TRIREDRAFT_122820
jgi|Trire2|109381|fgenesh5_pg.C_scaffold_15000183	109381	fgenesh5_pg.C_scaffold_15000183	2.77088	6.82522	-0.563975	5.82301e-06	2.17092e-05	up in ∆ypr2		109381	TRIRE2_109381	15	699841	700252	7	201	-	-	-	-	-	-	-	-	-	-	-	unknown protein	-	-	-	-	-	-	-	-	-	-	-	TRIREDRAFT_109381
jgi|Trire2|65114|e_gw1.15.38.1	65114	e_gw1.15.38.1	3.3028	9.86826	1.25734	2.33903e-12	1.75359e-11	up in ∆ypr2		65114	TRIRE2_65114	15	809539	811197	7	233	-	-	-	-	-	-	-	-	-	-	-	MFS permease	-	-	-	ANID_11821	1671	165568	167238	+	MFS drug efflux transporter	VIII	PF07690.9,PF07690.8,PF00083.17	TRIREDRAFT_65114
jgi|Trire2|82616|estExt_GeneWisePlus.C_440029	82616	estExt_GeneWisePlus.C_440029	1.88084	3.68289	7.39548	1.18996e-27	2.03157e-26	up in ∆ypr2		82616	TRIRE2_82616	44	38982	39452	7	245	CAZymes	cel5b	Glycoside hydrolase	Glycoside hydrolase family5	endo1,4-b-glucanase CEL5b (GenBank acc. No. AAP57754)	46284	89797	YLR299W	cel5B	Glycoside Hydrolase Family 5	candidate membrane-bound endoglucanase	GH5 membrane bound endoglucanase CEL5b	-	-	-	-	-	-	-	-	-	-	-	TRIREDRAFT_82616
jgi|Trire2|112540|fgenesh5_pg.C_scaffold_44000005	112540	fgenesh5_pg.C_scaffold_44000005	2.21415	4.64007	-0.961528	0.00152762	0.00379525	up in ∆ypr2		112540	TRIRE2_112540	44	15767	15891	7	254	-	-	-	-	-	-	-	-	-	-	-	orphan protein	-	-	-	-	-	-	-	-	-	-	-	TRIREDRAFT_112540
jgi|Trire2|54219|e_gw1.1.1008.1	54219	e_gw1.1.1008.1	1.2116	2.31594	2.86883	3.63313e-05	0.000119485	up in ∆ypr2		54219	TRIRE2_54219	1	2974094	2974264	7	265	CAZymes	0	Carbohydrate esterase	Carbohydrate esterase family5	0	-	47222	0	\N	Carbohydrate Esterase Family 5	candidate acetyl xylan esterase	CE5 acetyl xylan esterase	-	-	-	-	-	-	-	-	-	-	-	TRIREDRAFT_54219
jgi|Trire2|53428|e_gw1.1.814.1	53428	e_gw1.1.814.1	1.9608	3.89278	2.50366	7.97999e-20	9.35083e-19	up in ∆ypr2		53428	TRIRE2_53428	1	2939358	2939549	7	275	-	-	-	-	-	-	-	-	-	-	-	SAM-dependent metyhltransferase	NCU05616	0	0	ANID_04625	1170	98315	99484	+	arsenic methyltransferase Cyt19	III	PF08242.4,PF08241.5,PF08241.4,PF02353.13,PF01209.11,PF08242.5,PF01135.12,PF06325.6,PF01170.11	TRIREDRAFT_53428
jgi|Trire2|54444|e_gw1.1.953.1	54444	e_gw1.1.953.1	1.32139	2.49907	2.30213	5.8231e-10	3.5179e-09	up in ∆ypr2		54444	TRIRE2_54444	1	2938268	2938906	7	276	Transcription factors	0	bZIP	0	conserved hypothetical protein	0	58420	0	-	-	-	BZIP transcriptional regulator	-	-	-	-	-	-	-	-	-	-	-	TRIREDRAFT_54444
jgi|Trire2|54226|e_gw1.1.1845.1	54226	e_gw1.1.1845.1	1.10112	2.14522	2.25538	2.06694e-06	8.30218e-06	up in ∆ypr2		54226	TRIRE2_54226	1	2880934	2882073	7	279	-	-	-	-	-	-	-	-	-	-	-	unknown protein	-	-	-	-	-	-	-	-	-	-	-	TRIREDRAFT_54226
jgi|Trire2|2076|fgenesh1_pm.C_scaffold_1000410	2076	fgenesh1_pm.C_scaffold_1000410	3.41863	10.6933	1.78835	1.5102e-23	2.13702e-22	up in ∆ypr2		2076	TRIRE2_2076	1	2871876	2872160	7	284	-	-	-	-	-	-	-	-	-	-	-	malate permease	-	-	-	-	-	-	-	-	-	-	-	TRIREDRAFT_2076
jgi|Trire2|103172|fgenesh5_pg.C_scaffold_1000805	103172	fgenesh5_pg.C_scaffold_1000805	2.8311	7.11618	-0.297999	2.46706e-07	1.10751e-06	up in ∆ypr2		103172	TRIRE2_103172	1	2871251	2871286	7	285	-	-	-	-	-	-	-	-	-	-	-	orphan protein	-	-	-	-	-	-	-	-	-	-	-	TRIREDRAFT_103172
jgi|Trire2|103158|fgenesh5_pg.C_scaffold_1000791	103158	fgenesh5_pg.C_scaffold_1000791	1.27911	2.42689	3.23247	6.69021e-12	4.86061e-11	up in ∆ypr2	37	103158	TRIRE2_103158	1	2829291	2829359	7	299	Transcription factors	0	Zn2Cys6	0	putative transcriptional activator Mut3p	83642	30636	YJL206C	-	-	-	Zn2Cys6 transcriptional regulator	-	-	-	-	-	-	-	-	-	-	-	TRIREDRAFT_103158
jgi|Trire2|103157|fgenesh5_pg.C_scaffold_1000790	103157	fgenesh5_pg.C_scaffold_1000790	1.52136	2.87061	5.71448	1.93643e-48	7.02863e-47	up in ∆ypr2	37	103157	TRIRE2_103157	1	2827619	2827864	7	300	-	-	-	-	-	-	-	-	-	-	-	unknown protein	-	-	-	-	-	-	-	-	-	-	-	TRIREDRAFT_103157
jgi|Trire2|103156|fgenesh5_pg.C_scaffold_1000789	103156	fgenesh5_pg.C_scaffold_1000789	4.8936	29.7248	1.69807	9.70723e-39	2.65877e-37	up in ∆ypr2	37	103156	TRIRE2_103156	1	2825980	2826943	7	301	-	-	-	-	-	-	-	-	-	-	-	unknown protein	-	-	-	-	-	-	-	-	-	-	-	TRIREDRAFT_103156
jgi|Trire2|2068|fgenesh1_pm.C_scaffold_1000402	2068	fgenesh1_pm.C_scaffold_1000402	4.82984	28.4398	2.584	2.67597e-52	1.08608e-50	up in ∆ypr2	37	2068	TRIRE2_2068	1	2822506	2823069	7	303	-	-	-	-	-	-	-	-	-	-	-	MFS permease	-	-	-	-	-	-	-	-	-	-	-	TRIREDRAFT_2068
jgi|Trire2|103153|fgenesh5_pg.C_scaffold_1000786	103153	fgenesh5_pg.C_scaffold_1000786	3.18727	9.10887	2.75473	4.976e-43	1.57556e-41	up in ∆ypr2	37	103153	TRIRE2_103153	1	2820619	2820678	7	304	-	-	-	-	-	-	-	-	-	-	-	orphan protein	-	-	-	-	-	-	-	-	-	-	-	TRIREDRAFT_103153
jgi|Trire2|74282|estExt_GeneWisePlus.C_11554	74282	estExt_GeneWisePlus.C_11554	4.81975	28.2417	14.2409	2.26853e-164	1.35038e-161	up in ∆ypr2	37	74282	TRIRE2_74282	1	2815496	2817706	7	305	Effector proteins (competition and defense)	0	Tandem repeat proteins	0	Tandem repeats: possible associate to cell wall	217708	170508	0	-	-	-	QI74 orthologue	-	-	-	-	-	-	-	-	-	-	-	TRIREDRAFT_74282
jgi|Trire2|44366|estExt_Genewise1.C_11595	44366	estExt_Genewise1.C_11595	1.82034	3.53165	6.03033	1.16667e-64	6.55169e-63	up in ∆ypr2	37	44366	TRIRE2_44366	1	2812103	2813905	7	306	-	-	-	-	-	-	-	-	-	-	-	Glycosylphosphatidylinositol-specific phospholipase C	-	-	-	ANID_06382	1893	874	2766	-	conserved hypothetical protein	I	0	TRIREDRAFT_44366
jgi|Trire2|53961|e_gw1.1.1743.1	53961	e_gw1.1.1743.1	4.4347	21.6261	3.80593	3.59726e-99	4.34053e-97	up in ∆ypr2	37	53961	TRIRE2_53961	1	2802847	2804046	7	309	-	-	-	-	-	-	-	-	-	-	-	Aspartyl protease	-	-	-	ANID_06888	1321	264556	265876	-	propenicillopepsin	I	PF00026.16,PF00026.15	TRIREDRAFT_53961
jgi|Trire2|103147|fgenesh5_pg.C_scaffold_1000780	103147	fgenesh5_pg.C_scaffold_1000780	3.21616	9.29307	8.66914	4.79914e-118	8.24067e-116	up in ∆ypr2	37	103147	TRIRE2_103147	1	2798865	2799146	7	310	Secondary metabolism	0	Cytochrome P450	p450 superfamily (cI12078)	0	0	0	0	-	-	-	unknown protein	-	-	-	ANID_06057	1601	63242	64842	+	cytochrome P450 family protein	I	PF00067.14,PF00067.15	TRIREDRAFT_103147
jgi|Trire2|32364|gw1.1.922.1	32364	gw1.1.922.1	1.1294	2.18768	2.05843	8.67935e-06	3.16002e-05	up in ∆ypr2	37	32364	TRIRE2_32364	1	2796496	2797182	7	311	CAZymes	0	Carbohydrate esterase	Carbohydrate esterase family12	0	8382	130716	YOR126C	-	-	-	CE12 GDSL lipase	-	-	-	-	-	-	-	-	-	-	-	TRIREDRAFT_32364
jgi|Trire2|103145|fgenesh5_pg.C_scaffold_1000778	103145	fgenesh5_pg.C_scaffold_1000778	1.31794	2.4931	1.51779	1.53209e-06	6.24943e-06	up in ∆ypr2	37	103145	TRIRE2_103145	1	2794024	2794674	7	312	-	-	-	-	-	-	-	-	-	-	-	orphan protein	-	-	-	-	-	-	-	-	-	-	-	TRIREDRAFT_103145
jgi|Trire2|54048|e_gw1.1.1884.1	54048	e_gw1.1.1884.1	1.6915	3.22992	2.15392	2.58697e-11	1.78785e-10	up in ∆ypr2	37	54048	TRIRE2_54048	1	2792882	2793784	7	313	-	-	-	-	-	-	-	-	-	-	-	unknown protein	NCU03733	0	0	-	-	-	-	-	-	-	-	TRIREDRAFT_54048
jgi|Trire2|54239|e_gw1.1.1456.1	54239	e_gw1.1.1456.1	3.93817	15.3287	2.50845	4.82877e-35	1.1653e-33	up in ∆ypr2	37	54239	TRIRE2_54239	1	2787639	2788722	7	315	-	-	-	-	-	-	-	-	\N	multicopper oxidase	Hypothetical Multicopper Oxidase. Similar to the brown 2 laccase from Aspergillus fumigatus. N-terminal secretion signal predicted by SignalP	Multicopper oxidases	-	-	-	ANID_00901	2078	110269	112346	+	laccase	VIII	PF07732.8,PF07732.7,PF07731.7,PF07731.6,PF00394.15,PF00394.14	TRIREDRAFT_54239
jgi|Trire2|103134|fgenesh5_pg.C_scaffold_1000767	103134	fgenesh5_pg.C_scaffold_1000767	2.38243	5.21413	3.90619	1.07377e-46	3.67345e-45	up in ∆ypr2	38	103134	TRIRE2_103134	1	2765759	2767609	7	322	-	-	-	-	-	-	-	-	-	-	-	unknown protein only present with low similarity in Neurospora	-	-	-	-	-	-	-	-	-	-	-	TRIREDRAFT_103134
jgi|Trire2|103133|fgenesh5_pg.C_scaffold_1000766	103133	fgenesh5_pg.C_scaffold_1000766	1.54032	2.90859	1.52192	2.13574e-08	1.09284e-07	up in ∆ypr2	38	103133	TRIRE2_103133	1	2764250	2765210	7	323	-	-	-	-	-	-	-	-	-	-	-	unknown protein	NCU03375	0	0	ANID_00021	720	81704	82423	+	conserved hypothetical protein	VIII	0	TRIREDRAFT_103133
jgi|Trire2|103131|fgenesh5_pg.C_scaffold_1000764	103131	fgenesh5_pg.C_scaffold_1000764	1.03565	2.05004	3.16639	1.82926e-07	8.32906e-07	up in ∆ypr2	38	103131	TRIRE2_103131	1	2760073	2760337	7	325	-	-	-	-	-	-	-	-	-	-	-	unknown protein, 1 TM	NCU03374	0	0	-	-	-	-	-	-	-	-	TRIREDRAFT_103131
jgi|Trire2|103130|fgenesh5_pg.C_scaffold_1000763	103130	fgenesh5_pg.C_scaffold_1000763	2.18343	4.54231	4.82886	5.42423e-48	1.9296e-46	up in ∆ypr2	38	103130	TRIRE2_103130	1	2758068	2758816	7	326	Effector proteins (competition and defense)	0	Tandem repeat proteins	0	Tandem repeats	0	0	0	-	-	-	orphan protein	-	-	-	-	-	-	-	-	-	-	-	TRIREDRAFT_103130
jgi|Trire2|103129|fgenesh5_pg.C_scaffold_1000762	103129	fgenesh5_pg.C_scaffold_1000762	1.66625	3.17387	1.24997	2.02196e-08	1.03699e-07	up in ∆ypr2	38	103129	TRIRE2_103129	1	2755407	2755562	7	327	-	-	-	-	-	-	-	-	-	-	-	unknown protein	-	-	-	-	-	-	-	-	-	-	-	TRIREDRAFT_103129
jgi|Trire2|44362|estExt_Genewise1.C_11536	44362	estExt_Genewise1.C_11536	1.56984	2.96872	4.84673	1.13537e-34	2.66081e-33	up in ∆ypr2		44362	TRIRE2_44362	1	2703623	2703810	7	345	-	-	-	-	-	-	-	-	-	-	-	unknown protein	-	-	-	-	-	-	-	-	-	-	-	TRIREDRAFT_44362
jgi|Trire2|54768|e_gw1.1.447.1	54768	e_gw1.1.447.1	1.34304	2.53684	4.67419	1.59757e-24	2.38142e-23	up in ∆ypr2		54768	TRIRE2_54768	1	2699413	2699769	7	347	-	-	-	-	-	-	-	-	-	-	-	unknown protein	-	-	-	ANID_03539	1879	46681	48559	-	conserved hypothetical protein	II	0	TRIREDRAFT_54768
jgi|Trire2|103108|fgenesh5_pg.C_scaffold_1000741	103108	fgenesh5_pg.C_scaffold_1000741	2.36972	5.16841	5.61772	1.72644e-71	1.15905e-69	up in ∆ypr2		103108	TRIRE2_103108	1	2691457	2691905	7	349	-	-	-	-	-	-	-	-	-	-	-	phytanoyl-CoA dioxygenase family protein	-	-	-	ANID_06818	877	58352	59228	+	phytanoyl-CoA dioxygenase	I	PF05721.5,PF05721.6	TRIREDRAFT_103108
jgi|Trire2|119859|estExt_fgenesh5_pg.C_10726	119859	estExt_fgenesh5_pg.C_10726	2.24387	4.73666	4.00365	1.3191e-42	4.10391e-41	up in ∆ypr2		119859	TRIRE2_119859	1	2689222	2689726	7	350	CAZymes	chi18-13/ech30	Glycoside hydrolase	Glycoside hydrolase family18	chitinase; fungal subgroup B chitinase	45585	213202	YLR286C	chi18-13	Glycoside Hydrolase family 18, chitinase	chitinase, precursor protein, glycoside hydrolase family 18	GH18, chitinase CHI18-13	-	-	-	-	-	-	-	-	-	-	-	TRIREDRAFT_119859
jgi|Trire2|103103|fgenesh5_pg.C_scaffold_1000736	103103	fgenesh5_pg.C_scaffold_1000736	1.14517	2.21172	1.04859	0.000586504	0.00156279	up in ∆ypr2		103103	TRIRE2_103103	1	2680317	2680409	7	353	-	-	-	-	-	-	-	-	-	-	-	GCN5-N-Acetyltransferase	-	-	-	-	-	-	-	-	-	-	-	TRIREDRAFT_103103
jgi|Trire2|41325|gw1.1.1900.1	41325	gw1.1.1900.1	2.272	4.82994	1.76054	9.09997e-16	8.58011e-15	up in ∆ypr2		41325	TRIRE2_41325	1	2513549	2514298	7	400	-	-	-	-	-	-	-	-	-	-	-	RTA1 like protein; 7 TM	-	-	-	-	-	-	-	-	-	-	-	TRIREDRAFT_41325
jgi|Trire2|103048|fgenesh5_pg.C_scaffold_1000681	103048	fgenesh5_pg.C_scaffold_1000681	1.85323	3.61309	3.93345	8.1094e-31	1.62717e-29	up in ∆ypr2		103048	TRIRE2_103048	1	2492608	2492629	7	408	-	-	-	-	-	-	-	-	-	-	-	orphan protein	-	-	-	-	-	-	-	-	-	-	-	TRIREDRAFT_103048
jgi|Trire2|73102|kg2.C_scaffold_50000003	73102	kg2.C_scaffold_50000003	1.42074	2.67722	0.237472	0.000424632	0.00116591	up in ∆ypr2		73102	TRIRE2_73102	50	37472	37741	7	413	CAZymes	0	Glycoside hydrolase	Glycoside hydrolase family39	candidate b-glycosidase	33789	51209	0	\N	Glycoside Hydrolase Family 39	related to b-glycosidases	GH39 ?-irunidase	-	-	-	ANID_07117	1560	93909	95468	+	conserved hypothetical protein	IV	0	TRIREDRAFT_73102
jgi|Trire2|112643|fgenesh5_pg.C_scaffold_50000012	112643	fgenesh5_pg.C_scaffold_50000012	5.0352	32.7904	0.75933	5.875e-15	5.31488e-14	up in ∆ypr2		112643	TRIRE2_112643	50	31681	31712	7	415	Transcription factors	0	Fungal-trans	0	hypothetical protein	0	51089	YIL130W	-	-	-	Zn2Cys6 transcriptional regulator	-	-	-	-	-	-	-	-	-	-	-	TRIREDRAFT_112643
jgi|Trire2|71059|e_gw1.50.18.1	71059	e_gw1.50.18.1	2.98721	7.92942	2.04891	3.13321e-28	5.53988e-27	up in ∆ypr2		71059	TRIRE2_71059	50	14662	14862	7	423	-	-	-	-	-	-	-	-	-	-	-	MFS permease	-	-	-	ANID_01681	1823	282084	283906	+	MFS transporter	VII	PF07690.9,PF07690.8	TRIREDRAFT_71059
jgi|Trire2|71072|e_gw1.50.12.1	71072	e_gw1.50.12.1	3.2231	9.33793	1.53552	4.21493e-24	6.1697e-23	up in ∆ypr2		71072	TRIRE2_71072	50	10241	11881	7	424	-	-	-	-	-	-	-	-	-	-	-	Gluconate kinase	-	-	-	ANID_10486	3254	26116	29369	+	conserved hypothetical protein	II	TIGR01746,PF00550.17,PF07993.5,PF07993.4,PF00550.18,PF00501.21,PF01370.14,PF00501.20	TRIREDRAFT_71072
jgi|Trire2|70527|e_gw1.37.11.1	70527	e_gw1.37.11.1	3.46289	11.0264	4.46023	3.69458e-78	2.97197e-76	up in ∆ypr2		70527	TRIRE2_70527	37	11295	12448	7	431	Lipid Metabolism	0	lipase	phospholipase	Phospholiase B	297513	89587	YOL011W	\N	lysophospholipase	based on sequence homology with yeast probable phospholipase	lysophospholipase	-	-	-	-	-	-	-	-	-	-	-	TRIREDRAFT_70527
jgi|Trire2|70520|e_gw1.37.36.1	70520	e_gw1.37.36.1	1.85705	3.62267	1.76172	5.86334e-13	4.59244e-12	up in ∆ypr2		70520	TRIRE2_70520	37	14442	15101	7	432	-	-	-	-	-	-	-	-	-	-	-	short chain dehydrogenase/reductase	-	-	-	-	-	-	-	-	-	-	-	TRIREDRAFT_70520
jgi|Trire2|124175|estExt_fgenesh5_pg.C_370018	124175	estExt_fgenesh5_pg.C_370018	1.98675	3.96344	6.73284	6.5635e-82	5.63515e-80	up in ∆ypr2		124175	TRIRE2_124175	37	43250	44389	7	443	CAZymes	0	Glycoside hydrolase	Glycoside hydrolase family64	candidate b-glycosidase distantly related to b-1,3-glucanase	279684	171010	0	\N	Glycoside Hydrolase Family 64	candidate b-1,3-glucanase	GH64 endo-1,3-?-glucanase	NCU06505	0	0	-	-	-	-	-	-	-	-	TRIREDRAFT_124175
jgi|Trire2|124177|estExt_fgenesh5_pg.C_370023	124177	estExt_fgenesh5_pg.C_370023	1.34251	2.53593	5.19127	2.63815e-28	4.69243e-27	up in ∆ypr2		124177	TRIRE2_124177	37	67596	67744	7	448	-	-	-	-	-	-	-	-	-	-	-	unknown protein	-	-	-	-	-	-	-	-	-	-	-	TRIREDRAFT_124177
jgi|Trire2|82512|estExt_GeneWisePlus.C_390050	82512	estExt_GeneWisePlus.C_390050	2.59946	6.0606	7.12843	2.40099e-44	7.8529e-43	up in ∆ypr2		82512	TRIRE2_82512	39	60619	61120	7	489	Transcription factors	0	C2H2 zinc finger	0	C2H2 transcription factor	53983	183171	YDL020C	-	-	-	26S proteasome regulatory complex subunit Rpn4	NCU01640	rpn-4	0	ANID_00709	3242	4819	8060	-	conserved hypothetical protein	VIII	PF00096.18,PF00096.19	TRIREDRAFT_82512
jgi|Trire2|112439|fgenesh5_pg.C_scaffold_39000037	112439	fgenesh5_pg.C_scaffold_39000037	2.66991	6.36388	6.48551	4.44912e-80	3.74775e-78	up in ∆ypr2		112439	TRIRE2_112439	39	96099	97514	7	498	-	-	-	-	-	-	-	-	-	-	-	unknown protein	-	-	-	ANID_06578	1431	13248	14678	+	camp independent regulatory protein	I	PF09729.2,PF09729.1	TRIREDRAFT_112439
jgi|Trire2|107554|fgenesh5_pg.C_scaffold_9000357	107554	fgenesh5_pg.C_scaffold_9000357	1.16113	2.23632	4.82086	1.85712e-22	2.52393e-21	up in ∆ypr2		107554	TRIRE2_107554	9	1068644	1068684	7	544	Sexual development	GTT1	Other genes involved in meiosis in yeasts	0	ER associated glutathione S-transferase,	191487	66601	YIR038C	\N	glutathione transferase	\N	glutathione transferase	NCU05706	0	0	ANID_00629	875	20285	21159	-	glutathione S-transferase	VIII	PF00043.17,PF02798.13,PF02798.12,PF00043.18	TRIREDRAFT_107554
jgi|Trire2|78072|estExt_GeneWisePlus.C_90561	78072	estExt_GeneWisePlus.C_90561	1.1411	2.2055	0.727068	0.000604015	0.00160609	up in ∆ypr2		78072	TRIRE2_78072	9	1010082	1011809	7	574	-	-	-	-	-	-	-	-	\N	amidase-like protein	pfam01425, Amidase	Amidase	-	-	-	ANID_12124	2088	152602	154689	+	amidase	VII	PF01425.13,PF01425.14	TRIREDRAFT_78072
jgi|Trire2|107525|fgenesh5_pg.C_scaffold_9000328	107525	fgenesh5_pg.C_scaffold_9000328	1.21956	2.32875	2.86661	4.73453e-10	2.88367e-09	up in ∆ypr2		107525	TRIRE2_107525	9	1004045	1004721	7	576	-	-	-	-	-	-	-	-	-	-	-	unknown protein, only in fungi	-	-	-	ANID_10483	1021	8017	9037	+	conserved hypothetical protein	II	PF11905.1	TRIREDRAFT_107525
jgi|Trire2|107524|fgenesh5_pg.C_scaffold_9000327	107524	fgenesh5_pg.C_scaffold_9000327	1.25263	2.38275	2.82081	5.4571e-09	2.98204e-08	up in ∆ypr2		107524	TRIRE2_107524	9	1002539	1002733	7	577	-	-	-	-	-	-	-	-	-	-	-	orphan protein	-	-	-	-	-	-	-	-	-	-	-	TRIREDRAFT_107524
jgi|Trire2|61526|e_gw1.9.694.1	61526	e_gw1.9.694.1	2.69129	6.45889	4.86417	3.3223e-21	4.22575e-20	up in ∆ypr2		61526	TRIRE2_61526	9	996213	996406	7	579	-	-	-	-	-	-	-	-	-	-	-	unknown protein	-	-	-	-	-	-	-	-	-	-	-	TRIREDRAFT_61526
jgi|Trire2|61858|e_gw1.9.356.1	61858	e_gw1.9.356.1	3.14714	8.85897	0.731133	1.34119e-14	1.18452e-13	up in ∆ypr2	39	61858	TRIRE2_61858	9	901479	901691	7	602	-	-	-	-	-	-	-	-	-	-	-	unknown protein	NCU09714	0	0	ANID_04256	541	16934	17474	+	conserved hypothetical protein	II	0	TRIREDRAFT_61858
jgi|Trire2|61553|e_gw1.9.48.1	61553	e_gw1.9.48.1	3.21136	9.26221	2.80985	1.84316e-41	5.59782e-40	up in ∆ypr2	39	61553	TRIRE2_61553	9	898517	898679	7	603	-	-	-	-	-	-	-	-	-	-	-	D-xylulose 5-phosphate/D-fructose 6-phosphate phosphoketolase	NCU05151	0	0	ANID_04913	2784	189663	192446	-	phosphoketolase	III	PF09364.3,PF03894.7,PF03894.8,PF09363.3,PF09364.2,PF09363.2	TRIREDRAFT_61553
jgi|Trire2|107495|fgenesh5_pg.C_scaffold_9000298	107495	fgenesh5_pg.C_scaffold_9000298	3.42738	10.7583	2.15344	3.15009e-30	6.10134e-29	up in ∆ypr2	39	107495	TRIRE2_107495	9	896884	897363	7	604	-	-	-	-	-	-	-	-	-	-	-	unknown protein	-	-	-	-	-	-	-	-	-	-	-	TRIREDRAFT_107495
jgi|Trire2|107494|fgenesh5_pg.C_scaffold_9000297	107494	fgenesh5_pg.C_scaffold_9000297	2.48721	5.60691	3.18436	6.35831e-38	1.69473e-36	up in ∆ypr2	39	107494	TRIRE2_107494	9	895330	896103	7	605	-	-	-	-	-	-	-	-	-	-	-	orphan protein	-	-	-	-	-	-	-	-	-	-	-	TRIREDRAFT_107494
jgi|Trire2|62091|e_gw1.9.668.1	62091	e_gw1.9.668.1	1.98555	3.96013	1.3438	1.68079e-11	1.18545e-10	up in ∆ypr2	39	62091	TRIRE2_62091	9	893239	893676	7	606	-	-	-	-	-	-	-	-	-	-	-	Gluconate kinase	-	-	-	-	-	-	-	-	-	-	-	TRIREDRAFT_62091
jgi|Trire2|48211|estExt_Genewise1.C_90508	48211	estExt_Genewise1.C_90508	2.71791	6.57917	7.04699	1.04933e-109	1.5112e-107	up in ∆ypr2		48211	TRIRE2_48211	9	860866	862683	7	614	-	-	-	-	-	-	-	-	-	-	-	unknown protein, intracellular	NCU06265	0	0	ANID_03627	3525	265535	269059	-	conserved hypothetical protein	II	0	TRIREDRAFT_48211
jgi|Trire2|62100|e_gw1.9.287.1	62100	e_gw1.9.287.1	3.4765	11.1309	9.16417	5.04524e-52	2.02013e-50	up in ∆ypr2		62100	TRIRE2_62100	9	845414	846046	7	621	heat shock proteins	0	sHSP	0	hsp23, related to S. cerevisiae HSP26p and to N. crassa hsp30-like protein	255394	46820	YBR072W	-	-	-	Hsp30	NCU09364	hsp30	0	-	-	-	-	-	-	-	-	TRIREDRAFT_62100
jgi|Trire2|107475|fgenesh5_pg.C_scaffold_9000278	107475	fgenesh5_pg.C_scaffold_9000278	1.04679	2.06592	3.24855	1.06051e-08	5.60311e-08	up in ∆ypr2		107475	TRIRE2_107475	9	843150	843168	7	622	-	-	-	-	-	-	-	-	-	-	-	unknown protein	-	-	-	-	-	-	-	-	-	-	-	TRIREDRAFT_107475
jgi|Trire2|121870|estExt_fgenesh5_pg.C_90268	121870	estExt_fgenesh5_pg.C_90268	1.33134	2.51637	3.89775	4.82849e-18	5.18192e-17	up in ∆ypr2		121870	TRIRE2_121870	9	829231	830715	7	627	-	-	-	-	-	-	-	-	-	-	-	unknown protein	NCU09514	0	0	ANID_00056	1566	17020	18585	-	arrestin domain-containing protein	VIII	PF00339.22	TRIREDRAFT_121870
jgi|Trire2|107463|fgenesh5_pg.C_scaffold_9000266	107463	fgenesh5_pg.C_scaffold_9000266	1.24643	2.37254	5.11537	7.44914e-28	1.28653e-26	up in ∆ypr2		107463	TRIRE2_107463	9	803197	803341	7	632	-	-	-	-	-	-	-	-	-	-	-	exoribonuclease Dhp1	NCU01815	0	0	-	-	-	-	-	-	-	-	TRIREDRAFT_107463
jgi|Trire2|121856|estExt_fgenesh5_pg.C_90250	121856	estExt_fgenesh5_pg.C_90250	1.41829	2.67268	4.99348	9.53165e-25	1.43039e-23	up in ∆ypr2		121856	TRIRE2_121856	9	740717	741961	7	641	-	-	-	-	-	-	-	-	tr42600	4-hydroxyphenylpyruvate dioxygenase	COG3185	4-hydroxyphenylpyruvate dioxygenase	NCU01830	0	0	ANID_01899	1431	267043	268473	+	4-hydroxyphenylpyruvate dioxygenase	VII	TIGR01263,PF00903.18,PF00903.17	TRIREDRAFT_121856
jgi|Trire2|107386|fgenesh5_pg.C_scaffold_9000189	107386	fgenesh5_pg.C_scaffold_9000189	1.24032	2.36252	0.587744	0.000417473	0.00114767	up in ∆ypr2		107386	TRIRE2_107386	9	598327	598437	7	690	-	-	-	-	-	-	-	-	-	-	-	unknown protein, only in Gibberella and Neurospora	NCU01620	0	0	-	-	-	-	-	-	-	-	TRIREDRAFT_107386
jgi|Trire2|61948|e_gw1.9.196.1	61948	e_gw1.9.196.1	4.38808	20.9385	0.443924	6.34412e-07	2.69874e-06	up in ∆ypr2		61948	TRIRE2_61948	9	523415	523753	7	711	-	-	-	-	-	-	-	-	\N	ER-resident thioredoxin	Distantly related to ER-resident PDI-like thioredoxin family proteins involved in protein folding.	Protein disulfide isomerase 2	-	-	-	-	-	-	-	-	-	-	-	TRIREDRAFT_61948
jgi|Trire2|121785|estExt_fgenesh5_pg.C_90123	121785	estExt_fgenesh5_pg.C_90123	5.13836	35.221	4.91346	1.30899e-127	2.71814e-125	up in ∆ypr2		121785	TRIRE2_121785	9	410654	410686	7	746	-	-	-	-	-	-	-	-	-	-	-	ATP-dependent RNA helicase	-	-	-	-	-	-	-	-	-	-	-	TRIREDRAFT_121785
jgi|Trire2|61839|e_gw1.9.152.1	61839	e_gw1.9.152.1	1.49576	2.82013	1.12747	2.31357e-06	9.20582e-06	up in ∆ypr2		61839	TRIRE2_61839	9	337155	337554	7	762	-	-	-	-	-	-	-	-	-	-	-	unknown protein	-	-	-	-	-	-	-	-	-	-	-	TRIREDRAFT_61839
jgi|Trire2|107297|fgenesh5_pg.C_scaffold_9000100	107297	fgenesh5_pg.C_scaffold_9000100	1.29733	2.45773	1.98719	9.83551e-08	4.66143e-07	up in ∆ypr2		107297	TRIRE2_107297	9	314276	315808	7	766	-	-	-	-	-	-	-	-	-	-	-	orphan protein	-	-	-	-	-	-	-	-	-	-	-	TRIREDRAFT_107297
jgi|Trire2|73417|kg2.C_scaffold_9000020	73417	kg2.C_scaffold_9000020	1.10074	2.14465	7.27649	3.71899e-21	4.69687e-20	up in ∆ypr2		73417	TRIRE2_73417	9	276915	277106	7	774	Transcription factors	0	bZIP	0	bZIP transcription factor, related to meaB, which is involved in nitrogen metabolite repression	301990	56326	YOR028C	\N	Basic-leucine zipper transcription factor	Trancription factor meaB is involved in nitrogen metabolite repression	bZIP transcriptional regulator MeaB	NCU00223	0	0	ANID_04900	2263	150222	152484	+	conserved hypothetical protein	III	0	TRIREDRAFT_73417
jgi|Trire2|107268|fgenesh5_pg.C_scaffold_9000071	107268	fgenesh5_pg.C_scaffold_9000071	1.08223	2.11731	6.66264	9.32313e-28	1.60089e-26	up in ∆ypr2		107268	TRIRE2_107268	9	206706	207377	7	790	CAZymes	0	Carbohydrate esterase	Carbohydrate esterase family1	0	301998	82546	YJL068C	-	-	-	CE1 Esterase/lipase/thioesterase	NCU00173	0	0	ANID_08782	992	152814	153805	-	esterase	III	PF00326.14,PF00756.12,PF10503.2,PF00756.13,TIGR02821	TRIREDRAFT_107268
jgi|Trire2|43115|gw1.9.699.1	43115	gw1.9.699.1	1.08051	2.11478	3.20935	3.33626e-10	2.05303e-09	up in ∆ypr2		43115	TRIRE2_43115	9	205599	205673	7	791	-	-	-	-	-	-	-	-	-	-	-	SSCRP	-	-	-	-	-	-	-	-	-	-	-	TRIREDRAFT_43115
jgi|Trire2|121743|estExt_fgenesh5_pg.C_90030	121743	estExt_fgenesh5_pg.C_90030	1.42083	2.67739	6.60073	1.25048e-43	4.01637e-42	up in ∆ypr2		121743	TRIRE2_121743	9	80257	80410	7	822	-	-	-	-	-	-	-	-	\N	mitochondrial succinate-fumarate transporter-like protein	\N	Mitochondrial succinate/fumarate antiporter	NCU08561	0	0	ANID_07287	1201	10107	11307	+	succinate:fumarate antiporter	IV	PF00153.20,PF00153.19	TRIREDRAFT_121743
jgi|Trire2|107218|fgenesh5_pg.C_scaffold_9000021	107218	fgenesh5_pg.C_scaffold_9000021	3.0243	8.1359	0.0515857	1.51677e-09	8.76017e-09	up in ∆ypr2		107218	TRIRE2_107218	9	56873	57378	7	830	-	-	-	-	-	-	-	-	-	-	-	orphan protein	-	-	-	-	-	-	-	-	-	-	-	TRIREDRAFT_107218
jgi|Trire2|77770|estExt_GeneWisePlus.C_90011	77770	estExt_GeneWisePlus.C_90011	1.39241	2.62518	1.89352	7.65793e-09	4.1043e-08	up in ∆ypr2		77770	TRIRE2_77770	9	16135	16314	7	846	-	-	-	-	-	-	-	-	-	-	-	Zinc-containing alcohol dehydrogenase	-	-	-	-	-	-	-	-	-	-	-	TRIREDRAFT_77770
jgi|Trire2|77767|estExt_GeneWisePlus.C_90002	77767	estExt_GeneWisePlus.C_90002	1.08816	2.12603	1.62659	4.46582e-05	0.000145054	up in ∆ypr2		77767	TRIRE2_77767	9	3347	3500	7	849	-	-	-	-	-	-	-	-	-	-	-	Taurine catabolism dioxygenase TauD, putative	NCU09738	0	0	ANID_10081	1240	333151	334390	-	alpha-ketoglutarate dependent xanthine dioxygenase	VIII	PF02668.8,PF02668.9	TRIREDRAFT_77767
jgi|Trire2|110689|fgenesh5_pg.C_scaffold_22000002	110689	fgenesh5_pg.C_scaffold_22000002	2.66498	6.34218	2.40467	1.00646e-18	1.11497e-17	up in ∆ypr2		110689	TRIRE2_110689	22	9847	10259	7	851	Transcription factors	0	Zn2Cys6	0	Fungal transcriptional regulatory protein	321712	123716	YLR266C	-	-	-	Zn2Cys6 transcriptional regulator	-	-	-	-	-	-	-	-	-	-	-	TRIREDRAFT_110689
jgi|Trire2|67588|e_gw1.22.215.1	67588	e_gw1.22.215.1	2.06685	4.1897	3.40131	4.96926e-33	1.09828e-31	up in ∆ypr2		67588	TRIRE2_67588	22	64968	66467	7	865	-	-	-	-	-	-	-	-	-	-	-	NADH-dehydrogenase (ubiquinone)	NCU00153	ndi-1	0	ANID_10660	1736	133005	134740	-	pyridine nucleotide-disulphide oxidoreductase	V	PF07992.6,PF00070.19,PF00070.20,PF07992.7	TRIREDRAFT_67588
jgi|Trire2|110708|fgenesh5_pg.C_scaffold_22000021	110708	fgenesh5_pg.C_scaffold_22000021	1.14044	2.20448	1.59732	2.68022e-05	8.97663e-05	up in ∆ypr2		110708	TRIRE2_110708	22	70789	70995	7	867	-	-	-	-	-	-	-	-	-	-	-	FAD-linked oxidase	-	-	-	-	-	-	-	-	-	-	-	TRIREDRAFT_110708
jgi|Trire2|123455|estExt_fgenesh5_pg.C_220027	123455	estExt_fgenesh5_pg.C_220027	1.14979	2.21881	2.36392	5.11819e-07	2.19819e-06	up in ∆ypr2		123455	TRIRE2_123455	22	89890	90864	7	873	-	-	-	-	-	-	-	-	-	-	-	unknown protein	-	-	-	-	-	-	-	-	-	-	-	TRIREDRAFT_123455
jgi|Trire2|67778|e_gw1.22.277.1	67778	e_gw1.22.277.1	2.3981	5.27109	0.689637	3.04399e-10	1.88356e-09	up in ∆ypr2	40	67778	TRIRE2_67778	22	166734	167462	7	897	-	-	-	-	-	-	-	-	-	-	-	Hydroxysteroid 17-beta dehydrogenase 11	-	-	-	-	-	-	-	-	-	-	-	TRIREDRAFT_67778
jgi|Trire2|123468|estExt_fgenesh5_pg.C_220056	123468	estExt_fgenesh5_pg.C_220056	1.66084	3.162	3.15881	3.82236e-19	4.32571e-18	up in ∆ypr2	40	123468	TRIRE2_123468	22	168488	169558	7	898	-	-	-	-	-	-	-	-	\N	dehydrogenase	COG2070, Dioxygenases related to 2-nitropropane dioxygenase	IMP dehydrogenase	-	-	-	ANID_04120	1236	99821	101056	-	oxidoreductase 2-nitropropane dioxygenase	II	PF03060.8,PF03060.7	TRIREDRAFT_123468
jgi|Trire2|110744|fgenesh5_pg.C_scaffold_22000057	110744	fgenesh5_pg.C_scaffold_22000057	1.05801	2.08206	4.45812	6.27072e-16	5.96286e-15	up in ∆ypr2	40	110744	TRIRE2_110744	22	170144	170164	7	899	Heterotrimeric G-protein pathway	0	GPCRs	7-TM receptor	PTH11-like	0	29230	0	-	-	-	PTH11 GPCR	NCU07649	0	0	-	-	-	-	-	-	-	-	TRIREDRAFT_110744
jgi|Trire2|81058|estExt_GeneWisePlus.C_220090	81058	estExt_GeneWisePlus.C_220090	3.02821	8.15797	1.4529	6.75828e-16	6.41965e-15	up in ∆ypr2	40	81058	TRIRE2_81058	22	176906	178117	7	901	-	-	-	-	-	-	-	-	-	-	-	peptidase family S58	-	-	-	-	-	-	-	-	-	-	-	TRIREDRAFT_81058
jgi|Trire2|5337|fgenesh1_pm.C_scaffold_22000030	5337	fgenesh1_pm.C_scaffold_22000030	1.22237	2.3333	3.52901	1.09273e-11	7.81182e-11	up in ∆ypr2		5337	TRIRE2_5337	22	200103	201881	7	909	-	-	-	-	-	-	-	-	\N	Gamma-glutamyltranspeptidase	pfam01019, G_glu_transpept, Gamma-glutamyltranspeptidase	?-glutamyltranspeptidase	-	-	-	-	-	-	-	-	-	-	-	TRIREDRAFT_5337
jgi|Trire2|110757|fgenesh5_pg.C_scaffold_22000070	110757	fgenesh5_pg.C_scaffold_22000070	3.79914	13.9205	4.0246	2.31497e-73	1.62759e-71	up in ∆ypr2		110757	TRIRE2_110757	22	201943	202959	7	910	-	-	-	-	-	-	-	-	-	-	-	imidazole proprionase-related amidohydrolase	NCU09670	0	0	ANID_01184	1338	432172	433509	-	amidohydrolase	VIII	PF07969.4,PF01979.13,PF01979.12	TRIREDRAFT_110757
jgi|Trire2|123473|estExt_fgenesh5_pg.C_220071	123473	estExt_fgenesh5_pg.C_220071	1.65675	3.15306	6.09124	5.08752e-49	1.89277e-47	up in ∆ypr2		123473	TRIRE2_123473	22	206645	206800	7	912	-	-	-	-	-	-	-	-	-	-	-	MFS permease	-	-	-	ANID_09289	1848	156878	158725	-	membrane transporter	VIII	PF07690.9,PF07690.8,PF00083.17	TRIREDRAFT_123473
jgi|Trire2|110768|fgenesh5_pg.C_scaffold_22000081	110768	fgenesh5_pg.C_scaffold_22000081	1.62985	3.09481	3.76429	2.81026e-18	3.05638e-17	up in ∆ypr2		110768	TRIRE2_110768	22	239605	240758	7	921	-	-	-	-	-	-	-	-	-	-	-	unknown protein	-	-	-	-	-	-	-	-	-	-	-	TRIREDRAFT_110768
jgi|Trire2|123475|estExt_fgenesh5_pg.C_220082	123475	estExt_fgenesh5_pg.C_220082	2.66734	6.35255	10.5335	1.0419e-52	4.24801e-51	up in ∆ypr2		123475	TRIRE2_123475	22	242622	243067	7	923	Effector proteins (competition and defense)	0	Proteins with known effector domains	0	IPR008427 Extracellular membrane protein, CFEM domain	28334	27592	0	\N	cell wall mannoprotein	Putative cell wall Thr-rich mannoprotein. Distantly related to S. ecervisiae Dan4p.	cell wall Thr-rich mannoprotein. Distantly related to S. cerevisiae Dan4p.	-	-	-	-	-	-	-	-	-	-	-	TRIREDRAFT_123475
jgi|Trire2|67538|e_gw1.22.11.1	67538	e_gw1.22.11.1	4.52073	22.9549	5.53473	1.47181e-243	4.38059e-240	up in ∆ypr2		67538	TRIRE2_67538	22	282610	282789	7	934	Antioxidant system	cat-1	0	0	Catalase	295449	38844	YGR088W	\N	catalase	\N	Catalase	NCU08791	cat-1	0	ANID_08637	2428	172148	174575	-	catalase A	III	PF06628.4,PF01965.17,PF00199.11,PF06628.5,PF01965.16,PF00199.12	TRIREDRAFT_67538
jgi|Trire2|5347|fgenesh1_pm.C_scaffold_22000040	5347	fgenesh1_pm.C_scaffold_22000040	1.90979	3.75755	1.77886	7.47109e-13	5.78572e-12	up in ∆ypr2		5347	TRIRE2_5347	22	296069	296875	7	938	-	-	-	-	-	-	-	-	-	-	-	unknown protein	-	-	-	-	-	-	-	-	-	-	-	TRIREDRAFT_5347
jgi|Trire2|81102|estExt_GeneWisePlus.C_220198	81102	estExt_GeneWisePlus.C_220198	1.37057	2.58573	8.45645	1.27393e-21	1.65333e-20	up in ∆ypr2		81102	TRIRE2_81102	22	362223	362480	7	958	-	-	-	-	-	-	-	-	-	-	-	unknown protein	NCU07332	0	0	ANID_05338	1673	224327	225999	+	conserved hypothetical protein	V	PF00743.12,PF07992.7	TRIREDRAFT_81102
jgi|Trire2|5359|fgenesh1_pm.C_scaffold_22000052	5359	fgenesh1_pm.C_scaffold_22000052	4.84645	28.7692	4.34368	7.74086e-145	2.4685e-142	up in ∆ypr2		5359	TRIRE2_5359	22	433236	433608	7	973	-	-	-	-	-	-	-	-	-	-	-	unknown protein, Duf1348	NCU03152	0	0	ANID_11109	736	15719	16454	+	DUF1348 domain-containing protein	III	PF07080.4,PF07080.3	TRIREDRAFT_5359
jgi|Trire2|110830|fgenesh5_pg.C_scaffold_22000143	110830	fgenesh5_pg.C_scaffold_22000143	3.68937	12.9007	1.21084	4.45301e-22	5.92562e-21	up in ∆ypr2		110830	TRIRE2_110830	22	434522	434682	7	974	-	-	-	-	-	-	-	-	-	-	-	orphan protein	-	-	-	-	-	-	-	-	-	-	-	TRIREDRAFT_110830
jgi|Trire2|110831|fgenesh5_pg.C_scaffold_22000144	110831	fgenesh5_pg.C_scaffold_22000144	1.39384	2.62778	3.33387	2.59384e-16	2.52018e-15	up in ∆ypr2		110831	TRIRE2_110831	22	435648	436334	7	975	-	-	-	-	-	-	-	-	-	-	-	unknown protein	-	-	-	ANID_04181	1700	23214	24913	-	conserved hypothetical protein	II	0	TRIREDRAFT_110831
jgi|Trire2|5366|fgenesh1_pm.C_scaffold_22000059	5366	fgenesh1_pm.C_scaffold_22000059	1.15426	2.2257	3.76561	5.16198e-14	4.36884e-13	up in ∆ypr2		5366	TRIRE2_5366	22	491590	491792	7	987	-	-	-	-	-	-	-	-	-	-	-	O-methyltransferase, putative	-	-	-	ANID_03236	910	71443	72352	+	O-methyltransferase	VI	PF01596.10	TRIREDRAFT_5366
jgi|Trire2|67699|e_gw1.22.217.1	67699	e_gw1.22.217.1	3.32722	10.0368	4.53594	1.67445e-65	9.64591e-64	up in ∆ypr2		67699	TRIRE2_67699	22	525868	527313	7	998	-	-	-	-	-	-	-	-	\N	Pyruvate/2-oxoglutarate dehydrogenase	pfam00070, Pyr_redox, Pyridine nucleotide-disulphide oxidoreductase	FAD/NAD-oxidoreductase, only in Hypocreaceae	-	-	-	-	-	-	-	-	-	-	-	TRIREDRAFT_67699
jgi|Trire2|46819|estExt_Genewise1.C_60010	46819	estExt_Genewise1.C_60010	-1.3579	0.390151	7.13549	2.26757e-10	1.42285e-09	down in ∆ypr2		46819	TRIRE2_46819	6	16836	17049	1	6	Transport	0	Sugar transporter	transporter containing IPR003663 domain	0	34851	27972	YDL245C	-	-	-	MFS hexose transporter CLP1, transports cellodextrins in N. crassa	NCU05853	0	0	ANID_00233	1905	256558	258462	+	MFS sugar transporter	VIII	PF07690.9,TIGR00879,PF07690.8,PF00083.17,PF00083.16	TRIREDRAFT_46819
jgi|Trire2|36822|gw1.6.454.1	36822	gw1.6.454.1	-1.34722	0.393048	-0.265699	0.00328707	0.00760755	down in ∆ypr2		36822	TRIRE2_36822	6	46981	48242	1	14	CAZymes	0	Carbohydrate esterase	Carbohydrate esterase family1	0	-	53838	YGR201C	-	-	-	CE1 protein	NCU10521	gst-4	0	ANID_09304	755	207200	207954	+	translation elongation factor eEF-1B gamma subunit	VIII	PF00043.17,PF02798.13,PF02798.12,PF00043.18	TRIREDRAFT_36822
jgi|Trire2|59655|e_gw1.6.586.1	59655	e_gw1.6.586.1	-1.33356	0.396788	1.10429	5.62307e-06	2.10606e-05	down in ∆ypr2		59655	TRIRE2_59655	6	76236	76435	1	23	-	-	-	-	-	-	-	-	-	-	-	unknown protein	-	-	-	-	-	-	-	-	-	-	-	TRIREDRAFT_59655
jgi|Trire2|3267|fgenesh1_pm.C_scaffold_6000015	3267	fgenesh1_pm.C_scaffold_6000015	-2.06121	0.239614	4.94466	4.58159e-67	2.78292e-65	down in ∆ypr2		3267	TRIRE2_3267	6	113793	114080	1	32	-	-	-	-	-	-	-	-	-	-	-	MRSP1/expansin-like	-	-	-	ANID_09205	882	106123	107004	-	integral membrane protein	IV	0	TRIREDRAFT_3267
jgi|Trire2|105820|fgenesh5_pg.C_scaffold_6000046	105820	fgenesh5_pg.C_scaffold_6000046	-2.0774	0.236941	2.84911	7.69209e-25	1.16018e-23	down in ∆ypr2		105820	TRIRE2_105820	6	123750	123824	1	35	-	-	-	-	-	-	-	-	-	-	-	unknown protein	NCU11331	0	0	ANID_10869	1933	9070	11002	+	conserved hypothetical protein	I	PF00069.17,PF07714.10,PF00069.18	TRIREDRAFT_105820
jgi|Trire2|105840|fgenesh5_pg.C_scaffold_6000066	105840	fgenesh5_pg.C_scaffold_6000066	-1.76823	0.29357	4.45883	3.43174e-07	1.51319e-06	down in ∆ypr2		105840	TRIRE2_105840	6	169666	170567	1	51	-	-	-	-	-	-	-	-	-	-	-	unknown protein, 2 TMs	NCU00630	0	0	-	-	-	-	-	-	-	-	TRIREDRAFT_105840
jgi|Trire2|59597|e_gw1.6.569.1	59597	e_gw1.6.569.1	-1.15606	0.448735	1.8405	4.46189e-06	1.69677e-05	down in ∆ypr2		59597	TRIRE2_59597	6	177057	177178	1	53	Secondary metabolism	tps3	Terpenoid synthase	0	Terpenoid synthase domain containing	86577	222187	0	-	-	-	terpenoid synthase 3	-	-	-	-	-	-	-	-	-	-	-	TRIREDRAFT_59597
jgi|Trire2|105860|fgenesh5_pg.C_scaffold_6000086	105860	fgenesh5_pg.C_scaffold_6000086	-1.17977	0.441423	4.3949	8.17718e-17	8.17627e-16	down in ∆ypr2		105860	TRIRE2_105860	6	231285	231796	1	69	-	-	-	-	-	-	-	-	-	-	-	unknown protein	-	-	-	-	-	-	-	-	-	-	-	TRIREDRAFT_105860
jgi|Trire2|105874|fgenesh5_pg.C_scaffold_6000100	105874	fgenesh5_pg.C_scaffold_6000100	-1.07131	0.475887	1.38405	7.16507e-05	0.000225509	down in ∆ypr2		105874	TRIRE2_105874	6	285663	285830	1	82	-	-	-	-	-	-	-	-	-	-	-	FAD binding domain-containing protein	-	-	-	-	-	-	-	-	-	-	-	TRIREDRAFT_105874
jgi|Trire2|76690|estExt_GeneWisePlus.C_60145	76690	estExt_GeneWisePlus.C_60145	-1.16312	0.446545	5.61982	5.96945e-25	9.08027e-24	down in ∆ypr2		76690	TRIRE2_76690	6	328885	330909	1	96	-	-	-	-	-	-	-	-	-	-	-	unknown protein	NCU00984	0	0	ANID_05364	3390	292231	295620	+	von Willebrand factor type A domain-containing protein	V	PF00092.20,PF08487.2,PF05762.7,PF08487.3,PF00092.21	TRIREDRAFT_76690
jgi|Trire2|32712|gw1.6.318.1	32712	gw1.6.318.1	-1.48148	0.358122	7.54203	6.02479e-30	1.14702e-28	down in ∆ypr2	41	32712	TRIRE2_32712	6	459709	460191	1	128	-	-	-	-	-	-	-	-	-	-	-	unknown protein, NACHT domain/ankyrin repeats	NCU02967	0	0	-	-	-	-	-	-	-	-	TRIREDRAFT_32712
jgi|Trire2|105924|fgenesh5_pg.C_scaffold_6000150	105924	fgenesh5_pg.C_scaffold_6000150	-1.30207	0.405545	3.35614	3.33092e-15	3.06616e-14	down in ∆ypr2	41	105924	TRIRE2_105924	6	484124	484400	1	131	-	-	-	-	-	-	-	-	\N	Glycosyltransferase Family 1	candidate b-glycosyltransferase	GT1 ߀-glycosyltransferase	-	-	-	ANID_10777	1596	153167	154762	+	conserved hypothetical protein	I	PF00201.11	TRIREDRAFT_105924
jgi|Trire2|59368|e_gw1.6.311.1	59368	e_gw1.6.311.1	-2.27636	0.206418	5.8951	2.17368e-94	2.4261e-92	down in ∆ypr2	41	59368	TRIRE2_59368	6	486801	487094	1	132	-	-	-	-	-	-	-	-	\N	hypothetical protein	\N	unknown protein, Duf341	NCU06012	0	0	-	-	-	-	-	-	-	-	TRIREDRAFT_59368
jgi|Trire2|59482|e_gw1.6.2.1	59482	e_gw1.6.2.1	-1.9454	0.259643	6.99795	9.97462e-61	5.03183e-59	down in ∆ypr2	41	59482	TRIRE2_59482	6	489709	490009	1	133	Secondary metabolism	pks5g	Polyketide synthase	Reducing clade III	Polyketide synthase	33092	53926	YER061C	\N	polyketide synthase	candidate polyketide synthase	PKS	NCU06013	pks-1	0	-	-	-	-	-	-	-	-	TRIREDRAFT_59482
jgi|Trire2|3333|fgenesh1_pm.C_scaffold_6000081	3333	fgenesh1_pm.C_scaffold_6000081	-1.07946	0.473206	2.5377	3.68359e-08	1.8344e-07	down in ∆ypr2		3333	TRIRE2_3333	6	663761	664695	1	187	-	-	-	-	-	-	-	-	-	-	-	Alcohol dehydrogenase zinc-binding domain protein	-	-	-	-	-	-	-	-	-	-	-	TRIREDRAFT_3333
jgi|Trire2|59763|e_gw1.6.626.1	59763	e_gw1.6.626.1	-3.0768	0.11852	-0.0560944	3.28522e-10	2.02581e-09	down in ∆ypr2		59763	TRIRE2_59763	6	669859	670022	1	189	-	-	-	-	-	-	-	-	-	-	-	unknown protein	-	-	-	ANID_10565	994	306056	307049	+	conserved hypothetical protein	III	PF00106.17,PF00106.18,PF08659.3	TRIREDRAFT_59763
jgi|Trire2|106051|fgenesh5_pg.C_scaffold_6000277	106051	fgenesh5_pg.C_scaffold_6000277	-1.30887	0.403637	4.89899	2.2979e-27	3.84952e-26	down in ∆ypr2		106051	TRIRE2_106051	6	903350	905683	1	244	-	-	-	-	-	-	-	-	-	-	-	unknown protein	-	-	-	-	-	-	-	-	-	-	-	TRIREDRAFT_106051
jgi|Trire2|73173|kg2.C_scaffold_6000065	73173	kg2.C_scaffold_6000065	-3.97672	0.0635166	-1.60973	0.000157246	0.00046755	down in ∆ypr2		73173	TRIRE2_73173	6	1049044	1049209	1	276	Effector proteins (competition and defense)	hfb1	Hydrophobins	0	Hydrophobins	258206	60531	0	hfb1	hydrophobin	hydrophobin belonging to the class II of fungal hydrophobins PMID:8631337	HFB1	-	-	-	-	-	-	-	-	-	-	-	TRIREDRAFT_73173
jgi|Trire2|59434|e_gw1.6.540.1	59434	e_gw1.6.540.1	-1.85936	0.275599	7.82349	1.05063e-54	4.55392e-53	down in ∆ypr2		59434	TRIRE2_59434	6	1110025	1110960	1	286	-	-	-	-	-	-	-	-	-	-	-	unknown protein	NCU01927	0	0	ANID_00777	1897	153572	155468	+	conserved hypothetical protein	VIII	PF03127.7	TRIREDRAFT_59434
jgi|Trire2|59705|e_gw1.6.510.1	59705	e_gw1.6.510.1	-1.23525	0.42477	6.68169	2.23187e-35	5.47483e-34	down in ∆ypr2		59705	TRIRE2_59705	6	1114262	1115671	1	287	-	-	-	-	-	-	-	-	-	-	-	unknown protein	NCU01928	0	0	ANID_00770	1597	128889	130485	+	UBX domain-containing protein	VIII	PF00789.12,PF00789.13	TRIREDRAFT_59705
jgi|Trire2|59196|e_gw1.6.238.1	59196	e_gw1.6.238.1	-1.15187	0.450041	0.706528	0.000960887	0.00247255	down in ∆ypr2		59196	TRIRE2_59196	6	1191277	1191393	1	302	-	-	-	-	-	-	-	-	-	-	-	short chain dehydrogenase/reductase	-	-	-	-	-	-	-	-	-	-	-	TRIREDRAFT_59196
jgi|Trire2|106120|fgenesh5_pg.C_scaffold_6000346	106120	fgenesh5_pg.C_scaffold_6000346	-2.62956	0.161593	6.96011	3.54166e-122	6.58822e-120	down in ∆ypr2		106120	TRIRE2_106120	6	1193766	1193826	1	303	CAZymes	0	Carbohydrate esterase	Carbohydrate esterase family10	0	320236	83938	YDR428C	-	-	-	CE10 esterase/lipase	NCU06152	0	0	ANID_00666	1307	58467	59773	-	alpha/beta hydrolase fold protein	VIII	PF07859.5,PF07859.6,PF10340.2	TRIREDRAFT_106120
jgi|Trire2|106160|fgenesh5_pg.C_scaffold_6000386	106160	fgenesh5_pg.C_scaffold_6000386	-3.18157	0.110218	4.50766	8.71768e-78	6.95001e-76	down in ∆ypr2		106160	TRIRE2_106160	6	1336306	1336463	1	340	-	-	-	-	-	-	-	-	-	-	-	unknown protein, secreted	-	-	-	ANID_07976	843	295371	296213	-	conserved hypothetical protein	II	PF01636.16,PF01636.15	TRIREDRAFT_106160
jgi|Trire2|106161|fgenesh5_pg.C_scaffold_6000387	106161	fgenesh5_pg.C_scaffold_6000387	-1.03783	0.487059	1.54586	0.000707251	0.0018612	down in ∆ypr2		106161	TRIRE2_106161	6	1337854	1338998	1	341	-	-	-	-	-	-	-	-	-	-	-	Ankyrin	-	-	-	-	-	-	-	-	-	-	-	TRIREDRAFT_106161
jgi|Trire2|59628|e_gw1.6.269.1	59628	e_gw1.6.269.1	-1.84268	0.278804	1.71664	9.15644e-12	6.57747e-11	down in ∆ypr2		59628	TRIRE2_59628	6	1384498	1385111	1	350	CAZymes	0	Glycoside hydrolase	Glycoside hydrolase family128	0	34603	54091	0	-	-	-	GH128 protein	-	-	-	-	-	-	-	-	-	-	-	TRIREDRAFT_59628
jgi|Trire2|106171|fgenesh5_pg.C_scaffold_6000397	106171	fgenesh5_pg.C_scaffold_6000397	-1.9951	0.25085	5.4003	2.20906e-48	7.98571e-47	down in ∆ypr2		106171	TRIRE2_106171	6	1386216	1386236	1	351	-	-	-	-	-	-	-	-	-	-	-	HET protein	-	-	-	-	-	-	-	-	-	-	-	TRIREDRAFT_106171
jgi|Trire2|3422|fgenesh1_pm.C_scaffold_6000170	3422	fgenesh1_pm.C_scaffold_6000170	-1.36921	0.387104	-0.178158	0.00246004	0.00583882	down in ∆ypr2		3422	TRIRE2_3422	6	1450504	1450604	1	372	CAZymes	0	Glycoside hydrolase	Glycoside hydrolase family109	0	247050	29113	YMR315W	-	-	-	GH109 protein	-	-	-	ANID_03524	1370	168000	169369	-	oxidoreductase domain-containing protein	II	PF01408.14,PF01118.17,PF01408.15	TRIREDRAFT_3422
jgi|Trire2|119989|estExt_fgenesh5_pg.C_20004	119989	estExt_fgenesh5_pg.C_20004	-2.0457	0.242205	14.2288	4.722e-53	1.94298e-51	down in ∆ypr2		119989	TRIRE2_119989	2	17215	17344	1	374	Effector proteins (competition and defense)	hfb2	Hydrophobins	0	Hydrophobins	258295	91466	0	hfb2	hydrophobin	hydrophobin belonging to the class II of fungal hydrophobins, PMID:9346297	HFB2	-	-	-	-	-	-	-	-	-	-	-	TRIREDRAFT_119989
jgi|Trire2|55272|e_gw1.2.839.1	55272	e_gw1.2.839.1	-1.39413	0.380474	11.667	5.92602e-23	8.22915e-22	down in ∆ypr2		55272	TRIRE2_55272	2	49412	50299	1	382	-	-	-	-	-	-	-	-	-	-	-	unknown protein	-	-	-	-	-	-	-	-	-	-	-	TRIREDRAFT_55272
jgi|Trire2|120000|estExt_fgenesh5_pg.C_20021	120000	estExt_fgenesh5_pg.C_20021	-1.10197	0.465878	6.11477	2.26747e-30	4.43024e-29	down in ∆ypr2		120000	TRIRE2_120000	2	69242	70189	1	387	Transcription factors	0	Myb	0	conserved hypothetical protein	130997	221753	YER008C	\N	N`	\N	unknown protein	NCU01991	0	0	ANID_04813	3088	123895	126982	-	conserved hypothetical protein	III	0	TRIREDRAFT_120000
jgi|Trire2|33827|gw1.2.605.1	33827	gw1.2.605.1	-2.35043	0.196088	8.42672	1.82876e-79	1.52607e-77	down in ∆ypr2		33827	TRIRE2_33827	2	150435	150842	1	394	-	-	-	-	-	-	-	-	-	-	-	unknown protein	NCU09765	0	0	ANID_00493	608	352429	353036	+	surface protein 1	VIII	0	TRIREDRAFT_33827
jgi|Trire2|103463|fgenesh5_pg.C_scaffold_2000051	103463	fgenesh5_pg.C_scaffold_2000051	-4.3992	0.0473923	4.26659	7.39198e-136	1.78386e-133	down in ∆ypr2		103463	TRIRE2_103463	2	165089	166427	1	396	-	-	-	-	-	-	-	-	-	-	-	unknown protein	-	-	-	ANID_03203	1185	11231	12415	+	conserved hypothetical protein	VI	PF00646.25	TRIREDRAFT_103463
jgi|Trire2|120008|estExt_fgenesh5_pg.C_20052	120008	estExt_fgenesh5_pg.C_20052	-2.45049	0.182949	8.09522	5.22558e-89	5.48932e-87	down in ∆ypr2		120008	TRIRE2_120008	2	170380	171975	1	397	-	-	-	-	-	-	-	-	\N	GMC oxidoreductase	\N	GMC oxidoreductase	NCU09798	0	0	ANID_08329	2036	84369	86404	+	aryl-alcohol dehydrogenase	Unmapped scaffolds	PF05199.6,PF05199.5,PF00732.11,PF00732.12	TRIREDRAFT_120008
jgi|Trire2|55561|e_gw1.2.965.1	55561	e_gw1.2.965.1	-1.50834	0.351516	4.33495	5.80531e-14	4.88554e-13	down in ∆ypr2		55561	TRIRE2_55561	2	173617	173824	1	398	Heterotrimeric G-protein pathway	0	GPCRs	7-TM receptor	PTH11-like	130989	0	0	\N	PTH-type GPCR protein	hypothetical GPCR, PTH-type	PTH11 GPCR	NCU09796	0	0	-	-	-	-	-	-	-	-	TRIREDRAFT_55561
jgi|Trire2|55351|e_gw1.2.556.1	55351	e_gw1.2.556.1	-1.19245	0.437558	5.94109	7.92574e-34	1.79617e-32	down in ∆ypr2		55351	TRIRE2_55351	2	201669	201792	1	405	-	-	-	-	-	-	-	-	-	-	-	Alkyl hydroperoxide reductase/peroxiredoxin	NCU03151	0	0	ANID_08080	697	192636	193332	+	putative peroxiredoxin pmp20	II	PF08534.2,PF00578.14,PF08534.3,PF00578.13	TRIREDRAFT_55351
jgi|Trire2|103537|fgenesh5_pg.C_scaffold_2000125	103537	fgenesh5_pg.C_scaffold_2000125	-2.18705	0.2196	4.34432	5.93116e-52	2.36426e-50	down in ∆ypr2		103537	TRIRE2_103537	2	417616	417687	1	459	-	-	-	-	-	-	-	-	-	-	-	GCN5-N-acetyltransferase	NCU05291	0	0	ANID_05866	1286	239047	240332	-	acetyltransferase	I	PF00583.17,PF00583.16	TRIREDRAFT_103537
jgi|Trire2|55274|e_gw1.2.740.1	55274	e_gw1.2.740.1	-1.04269	0.485422	4.92518	5.00873e-15	4.57758e-14	down in ∆ypr2		55274	TRIRE2_55274	2	437867	438008	1	461	Transcription factors	0	Zn2Cys6	0	C6 finger domain-containing protein	34316	28488	YLR228C	-	-	-	Zn2Cys6 transcriptional regulator	NCU05294	0	0	ANID_05870	3139	251947	255085	-	C6 finger domain-containing protein	I	PF00172.11,PF00172.10	TRIREDRAFT_55274
jgi|Trire2|55644|e_gw1.2.519.1	55644	e_gw1.2.519.1	-1.13889	0.45411	7.43515	5.36536e-22	7.10791e-21	down in ∆ypr2		55644	TRIRE2_55644	2	441666	441839	1	462	-	-	-	-	-	-	-	-	psa5	non-peptidase proeosome, subunit alpha 5	alpha 5 subunit of the proteasome, noncatalytic,ea	20S proteasome alpha subunit Pup2	NCU05295	pca-5	0	ANID_05872	1089	257496	258584	-	proteasome component PUP2	I	PF10584.2,PF00227.18,PF10584.1,PF00227.19	TRIREDRAFT_55644
jgi|Trire2|38441|gw1.2.885.1	38441	gw1.2.885.1	-1.13871	0.454165	6.71094	5.24429e-18	5.61466e-17	down in ∆ypr2		38441	TRIRE2_38441	2	604655	605555	1	506	-	-	-	-	-	-	-	-	-	-	-	unknown protein	NCU09733	0	0	ANID_00726	1672	58535	60206	-	SUN domain-containing protein	VIII	PF03856.5,PF03856.6	TRIREDRAFT_38441
jgi|Trire2|44814|estExt_Genewise1.C_20342	44814	estExt_Genewise1.C_20342	-1.19955	0.43541	7.91411	2.25255e-22	3.03822e-21	down in ∆ypr2		44814	TRIRE2_44814	2	641145	641317	1	518	-	-	-	-	-	-	-	-	-	-	-	COPI-coated vesicle protein, putative	NCU07727	0	0	ANID_10033	902	93868	94769	+	COPI-coated vesicle protein	VIII	PF08507.2,PF08507.3	TRIREDRAFT_44814
jgi|Trire2|55990|e_gw1.2.303.1	55990	e_gw1.2.303.1	-1.36444	0.388385	5.08729	8.05118e-33	1.74488e-31	down in ∆ypr2		55990	TRIRE2_55990	2	650669	651586	1	521	-	-	-	-	-	-	-	-	-	-	-	unknown protein	-	-	-	-	-	-	-	-	-	-	-	TRIREDRAFT_55990
jgi|Trire2|103651|fgenesh5_pg.C_scaffold_2000239	103651	fgenesh5_pg.C_scaffold_2000239	-1.40087	0.378701	0.0338619	0.00121132	0.0030591	down in ∆ypr2		103651	TRIRE2_103651	2	763262	763929	1	551	-	-	-	-	-	-	-	-	-	-	-	unknown protein	-	-	-	-	-	-	-	-	-	-	-	TRIREDRAFT_103651
jgi|Trire2|55887|e_gw1.2.987.1	55887	e_gw1.2.987.1	-2.96977	0.127647	5.71678	4.23031e-158	1.98802e-155	down in ∆ypr2		55887	TRIRE2_55887	2	834681	834910	1	571	-	-	-	-	-	-	-	-	-	-	-	unknown protein, secreted	NCU07703	0	0	ANID_02112	1337	355464	356800	+	conserved hypothetical protein	VII	PF10282.1,PF10282.2	TRIREDRAFT_55887
jgi|Trire2|55886|e_gw1.2.995.1	55886	e_gw1.2.995.1	-1.35058	0.392136	3.77617	2.11265e-17	2.19602e-16	down in ∆ypr2		55886	TRIRE2_55886	2	946958	947107	1	595	CAZymes	0	Glycoside hydrolase	Glycoside hydrolase family16	candidate b-glycosidase realted to b-1,3-1,4-glucanase	310812	60900	0	\N	Glycoside Hydrolase Family 16	candidate b-glycosidase	GH16 glucan endo-1,3(4)-?-D-glucosidase	-	-	-	-	-	-	-	-	-	-	-	TRIREDRAFT_55886
jgi|Trire2|103712|fgenesh5_pg.C_scaffold_2000300	103712	fgenesh5_pg.C_scaffold_2000300	-3.28097	0.10288	1.81304	5.1063e-31	1.03859e-29	down in ∆ypr2		103712	TRIRE2_103712	2	987727	988155	1	606	-	-	-	-	-	-	-	-	-	-	-	unknown protein	-	-	-	-	-	-	-	-	-	-	-	TRIREDRAFT_103712
jgi|Trire2|120160|estExt_fgenesh5_pg.C_20334	120160	estExt_fgenesh5_pg.C_20334	-1.22682	0.427257	7.10832	8.92625e-28	1.53866e-26	down in ∆ypr2		120160	TRIRE2_120160	2	1108771	1108852	1	637	-	-	-	-	-	-	-	-	-	-	-	unknown protein	-	-	-	-	-	-	-	-	-	-	-	TRIREDRAFT_120160
jgi|Trire2|35768|gw1.2.742.1	35768	gw1.2.742.1	-1.10645	0.464435	5.66555	5.98421e-22	7.916e-21	down in ∆ypr2		35768	TRIRE2_35768	2	1156941	1159202	1	646	-	-	-	-	-	-	-	-	-	-	-	unknown protein	NCU08281	0	0	ANID_00572	2067	601105	603171	-	conserved hypothetical protein	VIII	0	TRIREDRAFT_35768
jgi|Trire2|31447|gw1.2.437.1	31447	gw1.2.437.1	-1.94916	0.258967	2.94547	1.92055e-25	2.998e-24	down in ∆ypr2		31447	TRIRE2_31447	2	1333710	1334360	1	703	-	-	-	-	-	-	-	-	-	-	-	unknown protein	-	-	-	-	-	-	-	-	-	-	-	TRIREDRAFT_31447
jgi|Trire2|33169|gw1.2.558.1	33169	gw1.2.558.1	-1.36589	0.387995	1.94133	4.99925e-09	2.74023e-08	down in ∆ypr2		33169	TRIRE2_33169	2	1338002	1338239	1	704	-	-	-	-	-	-	-	-	-	-	-	dienelactone hydrolase	-	-	-	ANID_01664	1008	231598	232605	-	dienelactone hydrolase	VII	PF01738.10,PF01738.11	TRIREDRAFT_33169
jgi|Trire2|74953|estExt_GeneWisePlus.C_20784	74953	estExt_GeneWisePlus.C_20784	-1.75195	0.296899	6.24519	2.47069e-63	1.34517e-61	down in ∆ypr2		74953	TRIRE2_74953	2	1487265	1487896	1	743	-	-	-	-	-	-	-	-	-	-	-	MFS permease	NCU04391	0	0	-	-	-	-	-	-	-	-	TRIREDRAFT_74953
jgi|Trire2|120224|estExt_fgenesh5_pg.C_20466	120224	estExt_fgenesh5_pg.C_20466	-1.32826	0.398248	8.45528	4.80641e-27	7.99189e-26	down in ∆ypr2		120224	TRIRE2_120224	2	1538310	1538494	1	754	-	-	-	-	-	-	-	-	-	-	-	C2H2 transcriptional regulator	NCU04341	0	0	-	-	-	-	-	-	-	-	TRIREDRAFT_120224
jgi|Trire2|55049|e_gw1.2.974.1	55049	e_gw1.2.974.1	-1.61321	0.32687	-0.502297	0.00182001	0.00443303	down in ∆ypr2		55049	TRIRE2_55049	2	1620874	1621337	1	772	protein kinases	ck1d	Casein kinase I	0	casein kinase I, related to N. crassa CK1a	-	-	YPL204W	\N	casein kinase 1, delta subunit	related to casein kinase 1 delta, probable hhp1-homologue (S. pombe) involved in DNA repair, related to D. melanogaster clock regulator Double time	casein kinase 1 delta	-	-	-	-	-	-	-	-	-	-	-	TRIREDRAFT_55049
jgi|Trire2|120290|estExt_fgenesh5_pg.C_20594	120290	estExt_fgenesh5_pg.C_20594	-1.03965	0.486447	6.81773	9.74541e-16	9.17898e-15	down in ∆ypr2		120290	TRIRE2_120290	2	1932642	1932682	1	864	-	-	-	-	-	-	-	-	-	-	-	thiamine pyrophosphokinase	NCU08029	0	0	ANID_00193	1015	133458	134472	-	thiamine pyrophosphokinase	VIII	PF00293.20,PF00293.21	TRIREDRAFT_120290
jgi|Trire2|122197|estExt_fgenesh5_pg.C_110050	122197	estExt_fgenesh5_pg.C_110050	-1.11853	0.460564	8.03352	1.06347e-21	1.3903e-20	down in ∆ypr2		122197	TRIRE2_122197	11	145678	145765	1	959	-	-	-	-	-	-	-	-	-	-	-	unknown protein	-	-	-	-	-	-	-	-	-	-	-	TRIREDRAFT_122197
jgi|Trire2|63200|e_gw1.11.102.1	63200	e_gw1.11.102.1	-1.45227	0.365445	5.36193	9.31911e-40	2.68421e-38	down in ∆ypr2		63200	TRIRE2_63200	11	163100	163191	1	966	Genome integrity	KU70	0	0	ATP-dependent DNA helicase II subunit 1	33616	83371	YMR284W	\N	conserved hypothetical protein	Similar to YKu70p (Hdf1p) of Saccharomyces cerevisiae, a component of the YKu70/80 heterodimer that functions in non-homologous end joining of DNA double strand breaks and telomere maintenance.	ku70	NCU08290	mus-51	KU70	ANID_07753	2166	49677	51842	+	DSB repair complex subunit Ku70	IV	PF03731.7,TIGR00578,PF02735.9,PF03730.6,PF03731.8,PF02037.19,PF02735.8,PF03730.7,PF02037.20	TRIREDRAFT_63200
jgi|Trire2|48792|estExt_Genewise1.C_110122	48792	estExt_Genewise1.C_110122	-1.22052	0.429128	5.4306	5.59534e-27	9.2864e-26	down in ∆ypr2		48792	TRIRE2_48792	11	196126	196372	1	973	-	-	-	-	-	-	-	-	-	-	-	amidase	NCU07309	0	0	ANID_10903	1821	12635	14455	-	chlorohydrolase	IV	TIGR02967,PF01979.13,PF01979.12	TRIREDRAFT_48792
jgi|Trire2|108096|fgenesh5_pg.C_scaffold_11000069	108096	fgenesh5_pg.C_scaffold_11000069	-1.52438	0.34763	1.53296	3.32711e-09	1.86023e-08	down in ∆ypr2		108096	TRIRE2_108096	11	198621	199495	1	974	-	-	-	-	-	-	-	-	-	-	-	unknown protein	-	-	-	-	-	-	-	-	-	-	-	TRIREDRAFT_108096
jgi|Trire2|122220|estExt_fgenesh5_pg.C_110085	122220	estExt_fgenesh5_pg.C_110085	-1.4726	0.360332	5.06807	4.38317e-33	9.71149e-32	down in ∆ypr2		122220	TRIRE2_122220	11	256846	257697	1	988	-	-	-	-	-	-	-	-	-	-	-	HET protein	-	-	-	-	-	-	-	-	-	-	-	TRIREDRAFT_122220
jgi|Trire2|78639|estExt_GeneWisePlus.C_110182	78639	estExt_GeneWisePlus.C_110182	-1.41196	0.3758	8.49343	2.13966e-30	4.1897e-29	down in ∆ypr2		78639	TRIRE2_78639	11	287331	287392	1	997	-	-	-	-	-	-	-	-	\N	Hypothetical protein	Contains and InterPro domain corresponding to extracellular aspartic proteases. Encodes a likely signal peptide based on SignalP ver. 3.0.	Serine/threonine protein kinase	NCU09728	0	0	-	-	-	-	-	-	-	-	TRIREDRAFT_78639
jgi|Trire2|108232|fgenesh5_pg.C_scaffold_11000205	108232	fgenesh5_pg.C_scaffold_11000205	-3.07638	0.118554	0.862971	4.92091e-17	4.98173e-16	down in ∆ypr2		108232	TRIRE2_108232	11	672364	672534	1	1088	-	-	-	-	-	-	-	-	-	-	-	orphan protein	-	-	-	-	-	-	-	-	-	-	-	TRIREDRAFT_108232
jgi|Trire2|62826|e_gw1.11.406.1	62826	e_gw1.11.406.1	-1.27951	0.411936	6.53498	5.20716e-38	1.39206e-36	down in ∆ypr2		62826	TRIRE2_62826	11	704400	705252	1	1096	-	-	-	-	-	-	-	-	-	-	-	unknown protein	NCU08517	0	0	-	-	-	-	-	-	-	-	TRIREDRAFT_62826
jgi|Trire2|108261|fgenesh5_pg.C_scaffold_11000234	108261	fgenesh5_pg.C_scaffold_11000234	-1.1641	0.446243	5.64842	9.97363e-28	1.7093e-26	down in ∆ypr2		108261	TRIRE2_108261	11	766018	766418	1	1111	-	-	-	-	-	-	-	-	-	-	-	SSCRP	NCU01653	0	0	-	-	-	-	-	-	-	-	TRIREDRAFT_108261
jgi|Trire2|108284|fgenesh5_pg.C_scaffold_11000257	108284	fgenesh5_pg.C_scaffold_11000257	-1.1699	0.444451	5.60657	3.43305e-22	4.59576e-21	down in ∆ypr2		108284	TRIRE2_108284	11	815053	815276	1	1127	-	-	-	-	-	-	-	-	-	-	-	unknown protein	-	-	-	-	-	-	-	-	-	-	-	TRIREDRAFT_108284
jgi|Trire2|63217|e_gw1.11.542.1	63217	e_gw1.11.542.1	-1.03512	0.487974	4.90247	2.21979e-11	1.54606e-10	down in ∆ypr2		63217	TRIRE2_63217	11	816416	817056	1	1128	-	-	-	-	-	-	-	-	-	-	-	unknown protein	NCU06737	0	0	ANID_04312	2186	23531	25716	-	conserved hypothetical protein	III	0	TRIREDRAFT_63217
jgi|Trire2|63290|e_gw1.11.489.1	63290	e_gw1.11.489.1	-1.26088	0.417289	0.476303	0.000553805	0.0014872	down in ∆ypr2		63290	TRIRE2_63290	11	1059754	1060531	1	1185	-	-	-	-	-	-	-	-	-	-	-	unknown protein	-	-	-	-	-	-	-	-	-	-	-	TRIREDRAFT_63290
jgi|Trire2|108357|fgenesh5_pg.C_scaffold_11000330	108357	fgenesh5_pg.C_scaffold_11000330	-1.79016	0.28914	9.25463	3.73759e-47	1.30363e-45	down in ∆ypr2		108357	TRIRE2_108357	11	1084725	1084980	1	1191	Transcription factors	0	C2H2 zinc finger	0	conserved hypothetical protein	167723	118500	YKL062W	-	-	-	C2H2 transcriptional regulator	NCU03552	0	0	-	-	-	-	-	-	-	-	TRIREDRAFT_108357
jgi|Trire2|29770|gw1.11.199.1	29770	gw1.11.199.1	-1.0285	0.490218	7.73202	1.49365e-15	1.39798e-14	down in ∆ypr2		29770	TRIRE2_29770	11	1097758	1098345	1	1193	-	-	-	-	-	-	-	-	-	-	-	unknown protein	NCU03549	0	0	ANID_00977	1332	324355	325686	-	conserved hypothetical protein	VIII	0	TRIREDRAFT_29770
jgi|Trire2|63107|e_gw1.11.524.1	63107	e_gw1.11.524.1	-1.40334	0.378053	3.70407	1.00353e-17	1.05666e-16	down in ∆ypr2		63107	TRIRE2_63107	11	1126462	1127328	1	1203	-	-	-	-	-	-	-	-	-	-	-	unknown protein	-	-	-	-	-	-	-	-	-	-	-	TRIREDRAFT_63107
jgi|Trire2|108381|fgenesh5_pg.C_scaffold_11000354	108381	fgenesh5_pg.C_scaffold_11000354	-1.25477	0.419062	5.235	1.34451e-23	1.91164e-22	down in ∆ypr2		108381	TRIRE2_108381	11	1152400	1153008	1	1210	Transcription factors	0	Zn2Cys6	0	predicted protein	83675	65068	YPL248C	-	-	-	Zn2Cys6 transcriptional regulator	-	-	-	-	-	-	-	-	-	-	-	TRIREDRAFT_108381
jgi|Trire2|41699|gw1.32.114.1	41699	gw1.32.114.1	-1.12873	0.457317	4.02376	1.04348e-13	8.61908e-13	down in ∆ypr2		41699	TRIRE2_41699	32	66210	66950	1	1228	-	-	-	-	-	-	-	-	-	-	-	HET protein	-	-	-	-	-	-	-	-	-	-	-	TRIREDRAFT_41699
jgi|Trire2|70096|e_gw1.32.33.1	70096	e_gw1.32.33.1	-1.36154	0.389166	3.88106	2.14062e-20	2.58991e-19	down in ∆ypr2		70096	TRIRE2_70096	32	68709	69623	1	1229	-	-	-	-	-	-	-	-	-	-	-	G߀-WD40 domain protein	-	-	-	-	-	-	-	-	-	-	-	TRIREDRAFT_70096
jgi|Trire2|41152|gw1.32.111.1	41152	gw1.32.111.1	-1.60837	0.327969	0.751528	8.6813e-06	3.16002e-05	down in ∆ypr2		41152	TRIRE2_41152	32	162868	163782	1	1253	-	-	-	-	-	-	-	-	-	-	-	unknown protein	-	-	-	-	-	-	-	-	-	-	-	TRIREDRAFT_41152
jgi|Trire2|112083|fgenesh5_pg.C_scaffold_32000044	112083	fgenesh5_pg.C_scaffold_32000044	-1.36298	0.388778	3.70758	3.47898e-14	3.00134e-13	down in ∆ypr2		112083	TRIRE2_112083	32	164232	166123	1	1254	-	-	-	-	-	-	-	-	-	-	-	HET protein	-	-	-	-	-	-	-	-	-	-	-	TRIREDRAFT_112083
jgi|Trire2|70021|e_gw1.32.8.1	70021	e_gw1.32.8.1	-1.81062	0.285069	3.74804	3.23251e-22	4.34031e-21	down in ∆ypr2		70021	TRIRE2_70021	32	203334	203404	1	1267	CAZymes	0	Carbohydrate esterase	Carbohydrate esterase family3	0	292337	29759	0	\N	Carbohydrate Esterase Family 3	candidate esterase related to acetyl xylan esterase	CE3 acetyl xylan Esterase	NCU04526	0	0	ANID_06464	3107	268829	271935	+	esterase	I	PF01839.15,PF00657.14,PF00657.15	TRIREDRAFT_70021
jgi|Trire2|82204|estExt_GeneWisePlus.C_320119	82204	estExt_GeneWisePlus.C_320119	-2.0911	0.234701	2.33503	3.59701e-16	3.45723e-15	down in ∆ypr2		82204	TRIRE2_82204	32	225310	225618	1	1273	-	-	-	-	-	-	-	-	-	-	-	ammonium transporter, high affinity	-	-	-	-	-	-	-	-	-	-	-	TRIREDRAFT_82204
jgi|Trire2|72788|kg2.C_scaffold_35000008	72788	kg2.C_scaffold_35000008	-2.28559	0.205102	3.82909	5.73782e-47	1.9935e-45	down in ∆ypr2		72788	TRIRE2_72788	35	96067	97713	1	1286	CAZymes	0	Glycosyl transferase	Glycosyl transferase family31	0	210706	39944	0	\N	Glycosyltransferase Family 31	distantly related to b-glycosyltransferases;Distant relative	GT 31 glycosyltransferase	NCU05878	0	0	-	-	-	-	-	-	-	-	TRIREDRAFT_72788
jgi|Trire2|112563|fgenesh5_pg.C_scaffold_45000005	112563	fgenesh5_pg.C_scaffold_45000005	-3.73925	0.0748814	1.68144	5.21663e-33	1.14727e-31	down in ∆ypr2		112563	TRIRE2_112563	45	12997	13482	1	1322	-	-	-	-	-	-	-	-	-	-	-	?-ketoglutarate dependent (FeII) dioxygenase	-	-	-	-	-	-	-	-	-	-	-	TRIREDRAFT_112563
jgi|Trire2|112564|fgenesh5_pg.C_scaffold_45000006	112564	fgenesh5_pg.C_scaffold_45000006	-1.7972	0.287732	0.293598	9.77583e-06	3.53251e-05	down in ∆ypr2		112564	TRIRE2_112564	45	14515	15270	1	1323	-	-	-	-	-	-	-	-	\N	Hypothetical protein	contains several InterPro motifs corresponding to aspartyl-tRNA synthetase, class IIb.	aspartyl-tRNA synthetase, class IIb.	-	-	-	-	-	-	-	-	-	-	-	TRIREDRAFT_112564
jgi|Trire2|112578|fgenesh5_pg.C_scaffold_45000020	112578	fgenesh5_pg.C_scaffold_45000020	-1.52977	0.346332	1.32601	0.0018837	0.00456681	down in ∆ypr2		112578	TRIRE2_112578	45	50149	50207	1	1334	-	-	-	-	-	-	-	-	-	-	-	unknown protein	NCU08847	0	0	-	-	-	-	-	-	-	-	TRIREDRAFT_112578
jgi|Trire2|60028|e_gw1.7.306.1	60028	e_gw1.7.306.1	-2.20504	0.216878	-0.0952143	1.83056e-06	7.40935e-06	down in ∆ypr2		60028	TRIRE2_60028	7	1403228	1404313	2	6	-	-	-	-	-	-	-	-	-	-	-	unknown protein	-	-	-	-	-	-	-	-	-	-	-	TRIREDRAFT_60028
jgi|Trire2|60518|e_gw1.7.792.1	60518	e_gw1.7.792.1	-3.08438	0.117899	5.92257	3.1095e-134	7.3065e-132	down in ∆ypr2		60518	TRIRE2_60518	7	1396135	1396902	2	9	-	-	-	-	-	-	-	-	-	-	-	short chain dehydrogenase/reductase	NCU02923	0	0	ANID_01300	823	344664	345486	-	conserved hypothetical protein	VIII	PF00106.18	TRIREDRAFT_60518
jgi|Trire2|60144|e_gw1.7.616.1	60144	e_gw1.7.616.1	-3.08046	0.11822	-0.881728	1.4032e-06	5.74471e-06	down in ∆ypr2		60144	TRIRE2_60144	7	1333050	1333317	2	28	Sulfur metabolism	0	sulfur assimilation	EC number 2.A.3.8.4	methionine permease, related to S. cerevisiae Mup1p	31104	47944	YGR055W	\N	high affinity methionine permease	hypothetical high affinity methionine permease, related to Aspergillus fumigatur high affinity methionine permease	Methionine transporter	NCU02195	0	0	ANID_09490	1732	280	2011	+	high affinity methionine permease	Unmapped scaffolds	PF00324.14	TRIREDRAFT_60144
jgi|Trire2|106646|fgenesh5_pg.C_scaffold_7000447	106646	fgenesh5_pg.C_scaffold_7000447	-1.93256	0.261964	7.97931	2.25278e-50	8.78389e-49	down in ∆ypr2		106646	TRIRE2_106646	7	1216429	1216747	2	63	Lipid Metabolism	0	Triglyceride utilization	Acyl-CoA synthetase	Acyl-CoA synthetase	302386	209780	YLR153C	-	-	-	Acyl-CoA synthetase	-	-	-	-	-	-	-	-	-	-	-	TRIREDRAFT_106646
jgi|Trire2|60182|e_gw1.7.316.1	60182	e_gw1.7.316.1	-1.87461	0.272701	-0.917035	0.00129214	0.00324908	down in ∆ypr2		60182	TRIRE2_60182	7	1153041	1153798	2	85	-	-	-	-	-	-	-	-	-	-	-	unknown protein	-	-	-	-	-	-	-	-	-	-	-	TRIREDRAFT_60182
jgi|Trire2|60337|e_gw1.7.318.1	60337	e_gw1.7.318.1	-1.14411	0.452468	3.83735	1.20788e-13	9.92198e-13	down in ∆ypr2		60337	TRIRE2_60337	7	1151513	1151620	2	86	-	-	-	-	-	-	-	-	-	-	-	unknown protein	-	-	-	-	-	-	-	-	-	-	-	TRIREDRAFT_60337
jgi|Trire2|106605|fgenesh5_pg.C_scaffold_7000406	106605	fgenesh5_pg.C_scaffold_7000406	-1.31434	0.40211	4.32772	1.65424e-17	1.73162e-16	down in ∆ypr2		106605	TRIRE2_106605	7	1119318	1119812	2	98	-	-	-	-	-	-	-	-	-	-	-	unknown protein	NCU08870	0	0	-	-	-	-	-	-	-	-	TRIREDRAFT_106605
jgi|Trire2|22129|estExt_fgenesh1_pm.C_70158	22129	estExt_fgenesh1_pm.C_70158	-1.35941	0.389742	7.2438	3.28029e-32	6.92428e-31	down in ∆ypr2		22129	TRIRE2_22129	7	1063004	1063792	2	117	CAZymes	0	Glycoside hydrolase	Glycoside hydrolase family61	0	302363	171588	0	\N	Glycoside hydrolases	distantly related and shorter than GH61 modules, Glycoside hydrolases not yet assigned to a family	GH61 polysaccharide monooxygenase	NCU01380	0	0	ANID_08175	1740	134059	135798	+	conserved hypothetical protein	II	PF03067.8	TRIREDRAFT_22129
jgi|Trire2|106538|fgenesh5_pg.C_scaffold_7000339	106538	fgenesh5_pg.C_scaffold_7000339	-1.8234	0.282554	7.86161	1.78032e-37	4.71705e-36	down in ∆ypr2		106538	TRIRE2_106538	7	951695	951736	2	150	Effector proteins (competition and defense)	hfb5	Hydrophobins	0	Hydrophobins	146062	19757	0	\N	class II hydrophobin	Putative class II hydrophobin, related to T. reesei HFB2.	HFB5	-	-	-	-	-	-	-	-	-	-	-	TRIREDRAFT_106538
jgi|Trire2|22115|estExt_fgenesh1_pm.C_70126	22115	estExt_fgenesh1_pm.C_70126	-1.84765	0.277844	5.67565	1.48236e-72	1.01815e-70	down in ∆ypr2		22115	TRIRE2_22115	7	878166	878882	2	171	Genome integrity	PARP1	0	0	Poly(ADP-ribose) polymerase 1	295780	89857	YLR330W	-	-	-	polyA polymerase (Poly[ADP-ribose] synthetase)	NCU08852	parp	npo	ANID_03129	2333	969035	971367	+	poly(ADP)-ribose polymerase	VI	PF05406.7,PF00533.18,PF00533.19,PF02877.6,PF05406.8,PF00644.13,PF00644.12,PF02877.7	TRIREDRAFT_22115
jgi|Trire2|121427|estExt_fgenesh5_pg.C_70307	121427	estExt_fgenesh5_pg.C_70307	-1.97196	0.254906	6.95763	8.97286e-66	5.27097e-64	down in ∆ypr2		121427	TRIRE2_121427	7	873887	875390	2	173	-	-	-	-	-	-	-	-	-	-	-	unknown protein	NCU01081	0	0	-	-	-	-	-	-	-	-	TRIREDRAFT_121427
jgi|Trire2|106491|fgenesh5_pg.C_scaffold_7000292	106491	fgenesh5_pg.C_scaffold_7000292	-1.34902	0.392558	0.794775	2.93779e-05	9.78423e-05	down in ∆ypr2		106491	TRIRE2_106491	7	827187	827339	2	190	-	-	-	-	-	-	-	-	-	-	-	unknown protein	NCU07592	0	0	-	-	-	-	-	-	-	-	TRIREDRAFT_106491
jgi|Trire2|106480|fgenesh5_pg.C_scaffold_7000281	106480	fgenesh5_pg.C_scaffold_7000281	-2.90566	0.133447	0.22115	3.96663e-11	2.69544e-10	down in ∆ypr2		106480	TRIRE2_106480	7	802324	803359	2	201	-	-	-	-	-	-	-	-	-	-	-	flavoprotein monooxygenases	NCU02925	fbm-1	0	-	-	-	-	-	-	-	-	TRIREDRAFT_106480
jgi|Trire2|121415|estExt_fgenesh5_pg.C_70273	121415	estExt_fgenesh5_pg.C_70273	-3.41986	0.093437	7.49579	1.71473e-155	6.95947e-153	down in ∆ypr2		121415	TRIRE2_121415	7	794294	795114	2	204	-	-	-	-	-	-	-	-	-	-	-	Zn2Cys6 transcriptional regulator	-	-	-	-	-	-	-	-	-	-	-	TRIREDRAFT_121415
jgi|Trire2|30776|gw1.7.341.1	30776	gw1.7.341.1	-3.82769	0.0704288	-0.634098	1.34244e-08	7.03027e-08	down in ∆ypr2		30776	TRIRE2_30776	7	708719	709003	2	230	Sulfur metabolism	0	sulfur assimilation	EC number 1.14.11.17	taurine dioxygenase	184293	17533	YLL057C	-	-	-	alpha-ketoglutarate-dependent sulfonate diounknown proteingenase	-	-	-	-	-	-	-	-	-	-	-	TRIREDRAFT_30776
jgi|Trire2|106405|fgenesh5_pg.C_scaffold_7000206	106405	fgenesh5_pg.C_scaffold_7000206	-3.28969	0.10226	1.9153	3.26212e-33	7.24563e-32	down in ∆ypr2		106405	TRIRE2_106405	7	555988	556313	2	262	CAZymes	0	Carbohydrate esterase	Carbohydrate esterase family5	0	322056	36225	YJR107W	\N	extracellular lipase-like protein	\N	CE5 extracellular lipase-like protein	NCU03639	0	0	ANID_08046	1041	98965	100005	+	lipase	II	PF01764.17,PF03893.8,PF03893.9,PF01764.18	TRIREDRAFT_106405
jgi|Trire2|106356|fgenesh5_pg.C_scaffold_7000157	106356	fgenesh5_pg.C_scaffold_7000157	-1.77517	0.292159	4.28814	3.30942e-30	6.38224e-29	down in ∆ypr2		106356	TRIRE2_106356	7	440981	441846	2	299	-	-	-	-	-	-	-	-	-	-	-	unknown protein	-	-	-	-	-	-	-	-	-	-	-	TRIREDRAFT_106356
jgi|Trire2|121350|estExt_fgenesh5_pg.C_70146	121350	estExt_fgenesh5_pg.C_70146	-1.50949	0.351234	11.2844	5.53556e-24	8.02386e-23	down in ∆ypr2		121350	TRIRE2_121350	7	427802	427817	2	305	-	-	-	-	-	-	-	-	\N	\N	related to CipC1	unknown protein	-	-	-	ANID_07937	487	192027	192513	-	CipC-like antibiotic response protein	II	PF12585.1	TRIREDRAFT_121350
jgi|Trire2|106315|fgenesh5_pg.C_scaffold_7000116	106315	fgenesh5_pg.C_scaffold_7000116	-1.35183	0.391795	3.90329	2.06397e-14	1.81033e-13	down in ∆ypr2		106315	TRIRE2_106315	7	333810	333833	2	332	-	-	-	-	-	-	-	-	-	-	-	serine protease	-	-	-	-	-	-	-	-	-	-	-	TRIREDRAFT_106315
jgi|Trire2|59827|e_gw1.7.469.1	59827	e_gw1.7.469.1	-1.09713	0.467444	2.8804	7.76044e-08	3.72743e-07	down in ∆ypr2		59827	TRIRE2_59827	7	326172	326684	2	335	-	-	-	-	-	-	-	-	-	-	-	unknown protein	-	-	-	-	-	-	-	-	-	-	-	TRIREDRAFT_59827
jgi|Trire2|121325|estExt_fgenesh5_pg.C_70092	121325	estExt_fgenesh5_pg.C_70092	-1.09672	0.467578	4.53417	9.94118e-19	1.10267e-17	down in ∆ypr2		121325	TRIRE2_121325	7	269031	269303	2	350	-	-	-	-	-	-	-	-	-	-	-	unknown protein	NCU03714	0	0	ANID_06915	1906	17030	18935	+	thioredoxin	I	PF05903.6,PF00085.12,PF08324.4,PF00085.13,PF05903.7,PF08324.3	TRIREDRAFT_121325
jgi|Trire2|121308|estExt_fgenesh5_pg.C_70059	121308	estExt_fgenesh5_pg.C_70059	-1.87299	0.273008	8.48176	7.28257e-50	2.79082e-48	down in ∆ypr2		121308	TRIRE2_121308	7	182615	182950	2	380	-	-	-	-	-	-	-	-	\N	\N	COG1012, PutA, NAD-dependent aldehyde dehydrogenases	PutA delta-1-pyrroline-5-carboxylate dehydrogenase	NCU09648	0	0	-	-	-	-	-	-	-	-	TRIREDRAFT_121308
jgi|Trire2|121306|estExt_fgenesh5_pg.C_70054	121306	estExt_fgenesh5_pg.C_70054	-1.16166	0.446999	7.25698	2.45617e-16	2.39423e-15	down in ∆ypr2		121306	TRIRE2_121306	7	167432	169284	2	385	-	-	-	-	-	-	-	-	-	-	-	Aspartyl protease	NCU07063	0	0	-	-	-	-	-	-	-	-	TRIREDRAFT_121306
jgi|Trire2|108649|fgenesh5_pg.C_scaffold_12000268	108649	fgenesh5_pg.C_scaffold_12000268	-1.22054	0.429123	6.68662	2.40095e-33	5.35953e-32	down in ∆ypr2		108649	TRIRE2_108649	12	986365	990284	2	440	Transcription factors	0	GATA type zinc finger	0	conserved hypothetical protein	77763	55566	YMR179W	-	-	-	GATA type Zn finger	NCU01461	0	0	ANID_06828	3718	87557	91274	-	GATA transcription factor	I	0	TRIREDRAFT_108649
jgi|Trire2|108645|fgenesh5_pg.C_scaffold_12000264	108645	fgenesh5_pg.C_scaffold_12000264	-1.09384	0.468512	4.81367	6.94531e-21	8.61314e-20	down in ∆ypr2		108645	TRIRE2_108645	12	975171	977927	2	444	-	-	-	-	-	-	-	-	-	-	-	unknown protein	NCU01176	0	0	ANID_08031	2562	51607	54168	-	conserved hypothetical protein	II	0	TRIREDRAFT_108645
jgi|Trire2|63526|e_gw1.12.567.1	63526	e_gw1.12.567.1	-1.30148	0.405708	1.96728	6.77002e-08	3.27462e-07	down in ∆ypr2		63526	TRIRE2_63526	12	829129	829626	2	480	-	-	-	-	-	-	-	-	-	-	-	SSCRP	-	-	-	-	-	-	-	-	-	-	-	TRIREDRAFT_63526
jgi|Trire2|108586|fgenesh5_pg.C_scaffold_12000205	108586	fgenesh5_pg.C_scaffold_12000205	-3.96871	0.0638704	1.15088	3.42142e-19	3.88181e-18	down in ∆ypr2	42	108586	TRIRE2_108586	12	746459	746495	2	505	-	-	-	-	-	-	-	-	-	-	-	unknown protein	-	-	-	-	-	-	-	-	-	-	-	TRIREDRAFT_108586
jgi|Trire2|79111|estExt_GeneWisePlus.C_120414	79111	estExt_GeneWisePlus.C_120414	-1.02489	0.491448	5.4981	6.86135e-20	8.09313e-19	down in ∆ypr2	42	79111	TRIRE2_79111	12	740321	740351	2	507	-	-	-	-	-	-	-	-	-	-	-	unknown protein	NCU08734	0	0	-	-	-	-	-	-	-	-	TRIREDRAFT_79111
jgi|Trire2|108583|fgenesh5_pg.C_scaffold_12000202	108583	fgenesh5_pg.C_scaffold_12000202	-1.47046	0.360868	6.33483	9.88675e-21	1.21764e-19	down in ∆ypr2	42	108583	TRIRE2_108583	12	738184	739110	2	508	-	-	-	-	-	-	-	-	-	-	-	unknown protein	-	-	-	-	-	-	-	-	-	-	-	TRIREDRAFT_108583
jgi|Trire2|63687|e_gw1.12.219.1	63687	e_gw1.12.219.1	-1.11989	0.46013	2.79254	5.22196e-09	2.86054e-08	down in ∆ypr2	42	63687	TRIRE2_63687	12	731430	731768	2	509	-	-	-	-	-	-	-	-	-	-	-	ankyrin	-	-	-	-	-	-	-	-	-	-	-	TRIREDRAFT_63687
jgi|Trire2|122448|estExt_fgenesh5_pg.C_120174	122448	estExt_fgenesh5_pg.C_120174	-1.79716	0.28774	7.59283	2.63577e-39	7.37768e-38	down in ∆ypr2		122448	TRIRE2_122448	12	645717	647258	2	536	-	-	-	-	-	-	-	-	-	-	-	C2H2 transcription factor	NCU04630	0	0	-	-	-	-	-	-	-	-	TRIREDRAFT_122448
jgi|Trire2|108553|fgenesh5_pg.C_scaffold_12000172	108553	fgenesh5_pg.C_scaffold_12000172	-1.28382	0.410707	0.012367	0.00396185	0.00895578	down in ∆ypr2		108553	TRIRE2_108553	12	619186	619230	2	540	-	-	-	-	-	-	-	-	-	-	-	orphan protein	-	-	-	-	-	-	-	-	-	-	-	TRIREDRAFT_108553
jgi|Trire2|4426|fgenesh1_pm.C_scaffold_12000104	4426	fgenesh1_pm.C_scaffold_12000104	-1.7358	0.300242	2.32202	3.07925e-14	2.66163e-13	down in ∆ypr2		4426	TRIRE2_4426	12	607333	609309	2	544	-	-	-	-	-	-	-	-	-	-	-	unknown protein	NCU04618	0	0	-	-	-	-	-	-	-	-	TRIREDRAFT_4426
jgi|Trire2|63653|e_gw1.12.543.1	63653	e_gw1.12.543.1	-1.18303	0.440427	2.57743	6.7742e-09	3.65921e-08	down in ∆ypr2		63653	TRIRE2_63653	12	546434	546940	2	561	-	-	-	-	-	-	-	-	-	-	-	ankyrin	-	-	-	-	-	-	-	-	-	-	-	TRIREDRAFT_63653
jgi|Trire2|122422|estExt_fgenesh5_pg.C_120123	122422	estExt_fgenesh5_pg.C_120123	-1.08444	0.471575	6.16208	4.1065e-30	7.88537e-29	down in ∆ypr2		122422	TRIRE2_122422	12	468977	468988	2	586	-	-	-	-	-	-	-	-	-	-	-	SSCRP	-	-	-	-	-	-	-	-	-	-	-	TRIREDRAFT_122422
jgi|Trire2|49193|estExt_Genewise1.C_120230	49193	estExt_Genewise1.C_120230	-1.03893	0.48669	8.30331	2.72583e-10	1.69491e-09	down in ∆ypr2		49193	TRIRE2_49193	12	412332	412503	2	599	CAZymes	0	Glycoside hydrolase	Glycoside hydrolase family17	candidate b-glycosidase distantly related to exo-1,3-glucanase	139054	2321	YGL028C	\N	Glycoside Hydrolase Family 17	candidate b-glycosidase	GH17 glucan 1,3-?-glucosidase	NCU09326	0	0	ANID_01551	1881	62235	64115	-	conserved hypothetical protein	VII	0	TRIREDRAFT_49193
jgi|Trire2|122376|estExt_fgenesh5_pg.C_120039	122376	estExt_fgenesh5_pg.C_120039	-1.09807	0.46714	6.7875	1.86078e-24	2.76455e-23	down in ∆ypr2		122376	TRIRE2_122376	12	146919	147704	2	671	-	-	-	-	-	-	-	-	-	-	-	unknown protein	NCU03074	0	0	-	-	-	-	-	-	-	-	TRIREDRAFT_122376
jgi|Trire2|122374|estExt_fgenesh5_pg.C_120035	122374	estExt_fgenesh5_pg.C_120035	-1.86289	0.274925	7.63371	3.78214e-56	1.69702e-54	down in ∆ypr2		122374	TRIRE2_122374	12	135763	135846	2	675	-	-	-	-	-	-	-	-	-	-	-	MRSP1/expansin-like	-	-	-	-	-	-	-	-	-	-	-	TRIREDRAFT_122374
jgi|Trire2|63837|e_gw1.12.393.1	63837	e_gw1.12.393.1	-1.17111	0.44408	3.39982	2.31377e-12	1.7361e-11	down in ∆ypr2		63837	TRIRE2_63837	12	35141	35734	2	698	Sexual development	mmi1	Regulation of meiosis	0	YTH family RNA binding protein,	163941	211736	YDR374C	-	-	-	YTH family RNA binding protein,	NCU09365	0	0	ANID_10537	2199	630	2828	+	splicing factor	II	PF00076.15,PF04146.8,PF00076.14,PF04146.7	TRIREDRAFT_63837
jgi|Trire2|108382|fgenesh5_pg.C_scaffold_12000001	108382	fgenesh5_pg.C_scaffold_12000001	-1.72695	0.302089	2.98282	4.12801e-21	5.1914e-20	down in ∆ypr2		108382	TRIRE2_108382	12	2751	2759	2	709	-	-	-	-	-	-	-	-	-	-	-	unknown protein	-	-	-	-	-	-	-	-	-	-	-	TRIREDRAFT_108382
jgi|Trire2|82599|estExt_GeneWisePlus.C_430014	82599	estExt_GeneWisePlus.C_430014	-1.36637	0.387866	7.95423	3.292e-31	6.72639e-30	down in ∆ypr2		82599	TRIRE2_82599	43	49812	50804	2	715	-	-	-	-	-	-	-	-	-	-	-	unknown protein	NCU03079	0	0	ANID_09466	1806	7200	9005	-	conserved hypothetical protein	Unmapped scaffolds	PF09423.3	TRIREDRAFT_82599
jgi|Trire2|110666|fgenesh5_pg.C_scaffold_21000132	110666	fgenesh5_pg.C_scaffold_21000132	-1.50578	0.352141	6.05191	3.68264e-20	4.39603e-19	down in ∆ypr2	43	110666	TRIRE2_110666	21	489914	490095	2	749	-	-	-	-	-	-	-	-	-	-	-	ferric reductase	NCU03868	0	0	-	-	-	-	-	-	-	-	TRIREDRAFT_110666
jgi|Trire2|110665|fgenesh5_pg.C_scaffold_21000131	110665	fgenesh5_pg.C_scaffold_21000131	-3.79428	0.072079	-1.72622	0.000485662	0.00132049	down in ∆ypr2	43	110665	TRIRE2_110665	21	483958	484359	2	750	-	-	-	-	-	-	-	-	-	-	-	orphan protein	-	-	-	-	-	-	-	-	-	-	-	TRIREDRAFT_110665
jgi|Trire2|80980|estExt_GeneWisePlus.C_210298	80980	estExt_GeneWisePlus.C_210298	-1.0866	0.470871	9.48658	2.43213e-16	2.37338e-15	down in ∆ypr2	43	80980	TRIRE2_80980	21	481168	482238	2	751	-	-	-	-	-	-	-	-	\N	porphyromonas-type peptidyl-arginine deiminase	hypothetical porphyromonas-type peptidyl-arginine deiminase, probably forms an alpha/beta propeller structure and may contain an FMN cofactor	peptidyl arginine deiminase	-	-	-	-	-	-	-	-	-	-	-	TRIREDRAFT_80980
jgi|Trire2|80973|estExt_GeneWisePlus.C_210285	80973	estExt_GeneWisePlus.C_210285	-1.14859	0.451066	4.99714	3.53145e-21	4.47267e-20	down in ∆ypr2		80973	TRIRE2_80973	21	452173	452909	2	758	Transport	0	ABC transporter	transporter containing IPR003439 domain	Pleiotropic drug resistance proteins (PDR1-15), ABC superfamily, related to S.cerevisiae Pdr5p	0	0	YNR070W	-	-	-	PDR-type ABC transporters	-	-	-	-	-	-	-	-	-	-	-	TRIREDRAFT_80973
jgi|Trire2|67418|e_gw1.21.222.1	67418	e_gw1.21.222.1	-1.42959	0.371237	5.30083	9.50737e-35	2.2458e-33	down in ∆ypr2		67418	TRIRE2_67418	21	371115	372215	2	775	Transcription factors	0	Fungal-trans	0	conserved hypothetical protein	292899	59084	YPR022C	-	-	-	C2H2 transcription factor	NCU03878	0	0	-	-	-	-	-	-	-	-	TRIREDRAFT_67418
jgi|Trire2|67377|e_gw1.21.80.1	67377	e_gw1.21.80.1	-1.32852	0.398176	4.00376	1.22657e-20	1.5044e-19	down in ∆ypr2		67377	TRIRE2_67377	21	163975	164138	2	834	Secondary metabolism	0	Cytochrome P450	p450 superfamily (cI12078)	0	0	0	0	-	-	-	Cytochrome P450 / E-class P450, group I	-	-	-	-	-	-	-	-	-	-	-	TRIREDRAFT_67377
jgi|Trire2|67504|e_gw1.21.320.1	67504	e_gw1.21.320.1	-3.43365	0.0925485	4.4685	1.91513e-113	3.0536e-111	down in ∆ypr2		67504	TRIRE2_67504	21	159159	160031	2	837	-	-	-	-	-	-	-	-	\N	Hypothetical protein	Predicted gene product contains Interpro motif IPR001865 that is typical of ribosomal protein S2.	ribosomal protein S2.	-	-	-	-	-	-	-	-	-	-	-	TRIREDRAFT_67504
jgi|Trire2|80879|estExt_GeneWisePlus.C_210099	80879	estExt_GeneWisePlus.C_210099	-2.41741	0.187192	4.235	6.90155e-59	3.31312e-57	down in ∆ypr2		80879	TRIRE2_80879	21	154699	154730	2	838	-	-	-	-	-	-	-	-	-	-	-	MFS H+/oligopeptide transporter	-	-	-	ANID_03408	2105	457722	459826	-	MFS peptide transporter Ptr2	VI	PF00854.13,PF07690.8,PF00854.14	TRIREDRAFT_80879
jgi|Trire2|120609|estExt_fgenesh5_pg.C_40110	120609	estExt_fgenesh5_pg.C_40110	-1.37206	0.38634	2.36282	1.58383e-10	1.01159e-09	down in ∆ypr2		120609	TRIRE2_120609	4	339105	340595	2	970	-	-	-	-	-	-	-	-	-	-	-	unknown protein	-	-	-	-	-	-	-	-	-	-	-	TRIREDRAFT_120609
jgi|Trire2|104762|fgenesh5_pg.C_scaffold_4000140	104762	fgenesh5_pg.C_scaffold_4000140	-1.02079	0.492846	3.0987	1.1805e-07	5.52157e-07	down in ∆ypr2		104762	TRIRE2_104762	4	418593	418919	2	991	Transcription factors	0	Myb	0	conserved hypothetical protein	248552	129172	0	-	-	-	unknown protein	NCU09329	0	0	-	-	-	-	-	-	-	-	TRIREDRAFT_104762
jgi|Trire2|104838|fgenesh5_pg.C_scaffold_4000216	104838	fgenesh5_pg.C_scaffold_4000216	-1.16277	0.446653	3.80679	3.75525e-11	2.55569e-10	down in ∆ypr2		104838	TRIRE2_104838	4	670863	672620	2	1047	-	-	-	-	-	-	-	-	-	-	-	unknown protein	NCU04576	0	0	ANID_02505	2014	55581	57594	+	F-box domain-containing protein	VII	PF00646.25	TRIREDRAFT_104838
jgi|Trire2|104842|fgenesh5_pg.C_scaffold_4000220	104842	fgenesh5_pg.C_scaffold_4000220	-1.05963	0.479755	7.57948	7.83543e-20	9.2056e-19	down in ∆ypr2		104842	TRIRE2_104842	4	687188	687646	2	1051	-	-	-	-	-	-	-	-	-	-	-	transthyretin-like protein	NCU01428	0	0	ANID_02910	447	273994	274440	+	transthyretin domain-containing protein	VI	PF00576.14,PF00576.13,TIGR02962	TRIREDRAFT_104842
jgi|Trire2|57424|e_gw1.4.787.1	57424	e_gw1.4.787.1	-1.1762	0.442514	3.96301	2.26939e-14	1.98078e-13	down in ∆ypr2		57424	TRIRE2_57424	4	839289	839411	2	1095	-	-	-	-	-	-	-	-	-	-	-	QIP, Putative exonuclease protein, involved in quelling	NCU00076	qip	0	ANID_02856	1616	112561	114176	-	conserved hypothetical protein	VI	0	TRIREDRAFT_57424
jgi|Trire2|105077|fgenesh5_pg.C_scaffold_4000455	105077	fgenesh5_pg.C_scaffold_4000455	-6.31187	0.0125875	-1.60858	5.14851e-05	0.00016614	down in ∆ypr2		105077	TRIRE2_105077	4	1384381	1385229	2	1243	-	-	-	-	-	-	-	-	-	-	-	pre-mRNA splicing factor ATP-dependent RNA helicase prp16	-	-	-	-	-	-	-	-	-	-	-	TRIREDRAFT_105077
jgi|Trire2|120813|estExt_fgenesh5_pg.C_40475	120813	estExt_fgenesh5_pg.C_40475	-1.01348	0.495349	5.64779	6.11907e-25	9.29204e-24	down in ∆ypr2		120813	TRIRE2_120813	4	1472200	1473403	2	1265	-	-	-	-	-	-	-	-	\N	hypothetical protein	pfam01302, CAP-Gly domain aligned	CAP-Gly domain aligned	NCU09139	0	0	ANID_05531	2002	495001	497002	+	tubulin-specific chaperone	V	PF01302.17,PF01302.18,PF00560.25	TRIREDRAFT_120813
jgi|Trire2|120821|estExt_fgenesh5_pg.C_40485	120821	estExt_fgenesh5_pg.C_40485	-1.23564	0.424655	11.5394	1.32047e-09	7.6711e-09	down in ∆ypr2		120821	TRIRE2_120821	4	1512258	1512605	2	1275	-	-	-	-	-	-	-	-	-	-	-	phytase	NCU09133	acw-7	0	-	-	-	-	-	-	-	-	TRIREDRAFT_120821
jgi|Trire2|120823|estExt_fgenesh5_pg.C_40488	120823	estExt_fgenesh5_pg.C_40488	-1.41261	0.37563	9.58564	2.18565e-23	3.07334e-22	down in ∆ypr2		120823	TRIRE2_120823	4	1524653	1524727	2	1278	Effector proteins (competition and defense)	0	Tandem repeat proteins	0	Tandem repeats: Trichoderma specific	0	0	0	\N	cell wall protein	Putative cell wall mannoprotein. Ser/Thr-rich.	cell wall mannoprotein	-	-	-	-	-	-	-	-	-	-	-	TRIREDRAFT_120823
jgi|Trire2|120837|estExt_fgenesh5_pg.C_40509	120837	estExt_fgenesh5_pg.C_40509	-1.1368	0.454767	8.78026	6.89163e-21	8.57038e-20	down in ∆ypr2		120837	TRIRE2_120837	4	1586513	1586807	2	1296	-	-	-	-	-	-	-	-	-	-	-	unknown protein, 1 TM domain	-	-	-	-	-	-	-	-	-	-	-	TRIREDRAFT_120837
jgi|Trire2|105156|fgenesh5_pg.C_scaffold_4000534	105156	fgenesh5_pg.C_scaffold_4000534	-1.33068	0.397581	2.24502	7.85009e-05	0.000245082	down in ∆ypr2		105156	TRIRE2_105156	4	1647474	1647808	2	1312	-	-	-	-	-	-	-	-	-	-	-	orphan protein	-	-	-	-	-	-	-	-	-	-	-	TRIREDRAFT_105156
jgi|Trire2|105171|fgenesh5_pg.C_scaffold_4000549	105171	fgenesh5_pg.C_scaffold_4000549	-2.35379	0.195632	1.70858	7.01631e-13	5.46196e-12	down in ∆ypr2		105171	TRIRE2_105171	4	1702100	1702922	2	1327	-	-	-	-	-	-	-	-	-	-	-	unknown protein	-	-	-	-	-	-	-	-	-	-	-	TRIREDRAFT_105171
jgi|Trire2|105196|fgenesh5_pg.C_scaffold_4000574	105196	fgenesh5_pg.C_scaffold_4000574	-1.38342	0.383308	5.34355	1.52361e-36	3.89808e-35	down in ∆ypr2		105196	TRIRE2_105196	4	1768811	1769328	2	1350	-	-	-	-	-	-	-	-	-	-	-	unknown protein	-	-	-	-	-	-	-	-	-	-	-	TRIREDRAFT_105196
jgi|Trire2|124283|estExt_fgenesh5_pg.C_490001	124283	estExt_fgenesh5_pg.C_490001	-1.62846	0.323434	6.73731	5.97047e-57	2.77658e-55	down in ∆ypr2		124283	TRIRE2_124283	49	5324	5740	2	1377	Chromatin and histone modification	0	HMKT family proteins	lysine methyltransferases (HMKTs) - SET domain	SmyD-like	29913	228756	YHR207C	-	-	-	unknown protein, SET and MYND domains	-	-	-	ANID_05998	1632	99953	101584	-	conserved hypothetical protein	I	PF01753.11,PF01753.10,PF00856.21	TRIREDRAFT_124283
jgi|Trire2|71029|e_gw1.48.21.1	71029	e_gw1.48.21.1	-1.73344	0.300734	6.72048	3.76313e-64	2.08702e-62	down in ∆ypr2		71029	TRIRE2_71029	48	3649	3738	2	1378	-	-	-	-	-	-	-	-	-	-	-	Ctr copper transporter, putative	NCU03281	tcu-2	0	ANID_02934	912	353515	354426	-	ctr copper transporter	VI	PF04145.8,PF04145.7	TRIREDRAFT_71029
jgi|Trire2|124277|estExt_fgenesh5_pg.C_480003	124277	estExt_fgenesh5_pg.C_480003	-1.12016	0.460043	7.64547	2.83792e-16	2.75433e-15	down in ∆ypr2		124277	TRIRE2_124277	48	7108	7824	2	1380	-	-	-	-	-	-	-	-	-	-	-	SSCRP	-	-	-	-	-	-	-	-	-	-	-	TRIREDRAFT_124277
jgi|Trire2|76590|estExt_GeneWisePlus.C_50791	76590	estExt_GeneWisePlus.C_50791	-1.13173	0.456367	6.91235	7.74653e-25	1.16642e-23	down in ∆ypr2		76590	TRIRE2_76590	5	1527881	1529784	2	1402	Transcription factors	0	Zn2Cys6	0	related to transcriptional regulatory protein Pro-1	135729	64402	YDR207C	-	-	-	Zn2Cys6 transcriptional regulator PRO1 (adv1), involved in hyphal fusion and fruiting body development	NCU07392	adv-1	0	ANID_01848	2352	136342	138693	-	C6 sexual development transcription factor	VII	PF11951.1,PF00172.11,PF00172.10	TRIREDRAFT_76590
jgi|Trire2|105652|fgenesh5_pg.C_scaffold_5000437	105652	fgenesh5_pg.C_scaffold_5000437	-1.43839	0.368979	-0.353717	0.00310026	0.00719392	down in ∆ypr2		105652	TRIRE2_105652	5	1332460	1332560	2	1451	heat shock proteins	0	HSP70 family	0	hypothetical protein, related to hsp70, related to S. cerevisiae KAR2p and to N. crassa hypothetical protein	31161	38815	YDL229W	-	-	-	unknown protein	NCU04396	0	0	ANID_07370	2320	121102	123421	-	conserved hypothetical protein	IV	PF00012.13	TRIREDRAFT_105652
jgi|Trire2|121058|estExt_fgenesh5_pg.C_50431	121058	estExt_fgenesh5_pg.C_50431	-2.00474	0.24918	0.436421	4.02901e-08	1.99529e-07	down in ∆ypr2		121058	TRIRE2_121058	5	1330343	1330842	2	1452	-	-	-	-	-	-	-	-	-	-	-	unknown protein	-	-	-	-	-	-	-	-	-	-	-	TRIREDRAFT_121058
jgi|Trire2|76539|estExt_GeneWisePlus.C_50676	76539	estExt_GeneWisePlus.C_50676	-1.08069	0.472802	6.39328	1.04159e-26	1.70648e-25	down in ∆ypr2		76539	TRIRE2_76539	5	1326265	1326812	2	1454	-	-	-	-	-	-	-	-	-	-	-	unknown protein	-	-	-	ANID_05771	477	476258	476734	-	conserved hypothetical protein	V	0	TRIREDRAFT_76539
jgi|Trire2|76522|estExt_GeneWisePlus.C_50639	76522	estExt_GeneWisePlus.C_50639	-1.07049	0.476156	9.47321	6.76274e-18	7.21439e-17	down in ∆ypr2		76522	TRIRE2_76522	5	1260262	1260268	2	1470	protein kinases	0	CAMK kinase	0	CAMK type kinase, related to N. crassa CAMK-1	301592	87272	YFR014C	\N	Calcium/calmodulin dependent protein kinase	hypothetical Calcium/calmodulin dependent protein kinase, may play a role in stress response (S. cerevisiae) or regulation of circadian clock (N. crassa)	Calcium/calmodulin-dependent protein kinase	NCU09123	camk-1	0	ANID_02412	2147	195758	197904	+	calmodulin-dependent protein kinase	VII	PF00069.17,PF07714.9,PF07714.10,PF00069.18	TRIREDRAFT_76522
jgi|Trire2|121033|estExt_fgenesh5_pg.C_50386	121033	estExt_fgenesh5_pg.C_50386	-1.18749	0.439066	8.21515	6.29721e-23	8.73102e-22	down in ∆ypr2		121033	TRIRE2_121033	5	1156205	1156888	2	1492	-	-	-	-	-	-	-	-	-	-	-	orphan protein	-	-	-	-	-	-	-	-	-	-	-	TRIREDRAFT_121033
jgi|Trire2|105538|fgenesh5_pg.C_scaffold_5000323	105538	fgenesh5_pg.C_scaffold_5000323	-1.08121	0.472632	3.84346	5.91736e-13	4.63068e-12	down in ∆ypr2		105538	TRIRE2_105538	5	997853	997858	2	1540	-	-	-	-	-	-	-	-	-	-	-	unknown protein	NCU00496	0	0	-	-	-	-	-	-	-	-	TRIREDRAFT_105538
jgi|Trire2|105515|fgenesh5_pg.C_scaffold_5000300	105515	fgenesh5_pg.C_scaffold_5000300	-2.02109	0.246372	3.44584	9.55018e-26	1.5066e-24	down in ∆ypr2		105515	TRIRE2_105515	5	941518	942060	2	1560	-	-	-	-	-	-	-	-	-	-	-	orphan protein	-	-	-	-	-	-	-	-	-	-	-	TRIREDRAFT_105515
jgi|Trire2|73048|kg2.C_scaffold_5000057	73048	kg2.C_scaffold_5000057	-1.36878	0.387219	8.83547	8.58964e-29	1.55572e-27	down in ∆ypr2		73048	TRIRE2_73048	5	897025	897579	2	1575	-	-	-	-	-	-	-	-	-	-	-	unknown protein	-	-	-	-	-	-	-	-	-	-	-	TRIREDRAFT_73048
jgi|Trire2|58602|e_gw1.5.377.1	58602	e_gw1.5.377.1	-1.64808	0.319065	6.43651	8.96051e-49	3.29253e-47	down in ∆ypr2		58602	TRIRE2_58602	5	796536	797120	2	1608	-	-	-	-	-	-	-	-	-	-	-	unknown protein	-	-	-	ANID_02117	504	375125	375628	+	conserved hypothetical protein	VII	0	TRIREDRAFT_58602
jgi|Trire2|105455|fgenesh5_pg.C_scaffold_5000240	105455	fgenesh5_pg.C_scaffold_5000240	-1.56094	0.338929	4.30322	2.17151e-14	1.90093e-13	down in ∆ypr2		105455	TRIRE2_105455	5	777589	777855	2	1614	-	-	-	-	-	-	-	-	-	-	-	unknown protein	-	-	-	-	-	-	-	-	-	-	-	TRIREDRAFT_105455
jgi|Trire2|58366|e_gw1.5.55.1	58366	e_gw1.5.55.1	-3.37687	0.0962632	0.0352714	1.3259e-08	6.94777e-08	down in ∆ypr2	44	58366	TRIRE2_58366	5	767731	767950	2	1617	-	-	-	-	-	-	-	-	-	-	-	AAA+-type ATPase	-	-	-	-	-	-	-	-	-	-	-	TRIREDRAFT_58366
jgi|Trire2|76360|estExt_GeneWisePlus.C_50357	76360	estExt_GeneWisePlus.C_50357	-1.81468	0.284267	1.3546	3.36926e-08	1.68444e-07	down in ∆ypr2	44	76360	TRIRE2_76360	5	763515	764015	2	1618	-	-	-	-	-	-	-	-	-	-	-	unknown protein, 1 TM domain	-	-	-	-	-	-	-	-	-	-	-	TRIREDRAFT_76360
jgi|Trire2|76359|estExt_GeneWisePlus.C_50356	76359	estExt_GeneWisePlus.C_50356	-1.01964	0.493239	9.69805	2.81376e-12	2.09717e-11	down in ∆ypr2	44	76359	TRIRE2_76359	5	760611	761058	2	1619	-	-	-	-	-	-	-	-	-	-	-	unknown protein, only present in ascomycota	NCU05356	0	0	-	-	-	-	-	-	-	-	TRIREDRAFT_76359
jgi|Trire2|105449|fgenesh5_pg.C_scaffold_5000234	105449	fgenesh5_pg.C_scaffold_5000234	-2.54344	0.171533	6.11014	8.23354e-79	6.7447e-77	down in ∆ypr2	44	105449	TRIRE2_105449	5	755643	755897	2	1620	-	-	-	-	-	-	-	-	-	-	-	Cyclin C-dependent kinase CDK8	-	-	-	-	-	-	-	-	-	-	-	TRIREDRAFT_105449
jgi|Trire2|120927|estExt_fgenesh5_pg.C_50180	120927	estExt_fgenesh5_pg.C_50180	-2.08425	0.235818	4.35165	4.90489e-32	1.02807e-30	down in ∆ypr2	45	120927	TRIRE2_120927	5	557781	557822	2	1665	-	-	-	-	-	-	-	-	-	-	-	ankyrin containing protein	-	-	-	-	-	-	-	-	-	-	-	TRIREDRAFT_120927
jgi|Trire2|120926|estExt_fgenesh5_pg.C_50179	120926	estExt_fgenesh5_pg.C_50179	-1.87934	0.271808	6.11337	8.61767e-22	1.13158e-20	down in ∆ypr2	45	120926	TRIRE2_120926	5	556579	556887	2	1666	-	-	-	-	-	-	-	-	-	-	-	orphan protein	-	-	-	-	-	-	-	-	-	-	-	TRIREDRAFT_120926
jgi|Trire2|41607|gw1.5.839.1	41607	gw1.5.839.1	-1.09814	0.46712	3.31593	4.97647e-10	3.0243e-09	down in ∆ypr2	45	41607	TRIRE2_41607	5	555077	555488	2	1667	-	-	-	-	-	-	-	-	-	-	-	unknown protein	-	-	-	ANID_06802	2062	3301	5362	-	conserved hypothetical protein	I	0	TRIREDRAFT_41607
jgi|Trire2|105393|fgenesh5_pg.C_scaffold_5000178	105393	fgenesh5_pg.C_scaffold_5000178	-1.36649	0.387834	2.15653	3.96191e-08	1.96424e-07	down in ∆ypr2	45	105393	TRIRE2_105393	5	551336	551420	2	1668	-	-	-	-	-	-	-	-	-	-	-	unknown protein	-	-	-	ANID_08323	1140	62814	63953	-	conserved hypothetical protein	Unmapped scaffolds	PF01048.12,PF01048.13	TRIREDRAFT_105393
jgi|Trire2|42571|gw1.5.885.1	42571	gw1.5.885.1	-2.43811	0.184525	0.839841	2.54983e-10	1.59324e-09	down in ∆ypr2		42571	TRIRE2_42571	5	478781	479320	2	1688	Genome integrity	MutT	0	0	Hydrolase that converts various nucleotide triphosphates (NTPs) to the corresponding nucleotide monophosphates and diphosphate, and nucleotide diphosphates to nucleotide monophosphates and inorganic phosphate	132598	46976	YOR163W	-	-	-	unknown protein	NCU09154	0	0	ANID_10096	857	383590	384446	-	NUDIX domain-containing protein	VIII	PF00293.20,PF00293.21	TRIREDRAFT_42571
jgi|Trire2|42267|gw1.5.873.1	42267	gw1.5.873.1	-1.22753	0.427047	2.35798	4.92445e-08	2.41596e-07	down in ∆ypr2		42267	TRIRE2_42267	5	414503	414658	2	1705	-	-	-	-	-	-	-	-	-	-	-	ankyrin repeat protein	-	-	-	-	-	-	-	-	-	-	-	TRIREDRAFT_42267
jgi|Trire2|58814|e_gw1.5.468.1	58814	e_gw1.5.468.1	-1.35105	0.392007	3.18054	2.13447e-13	1.72321e-12	down in ∆ypr2		58814	TRIRE2_58814	5	362724	364283	2	1721	-	-	-	-	-	-	-	-	-	-	-	unknown protein with WD repeats	-	-	-	-	-	-	-	-	-	-	-	TRIREDRAFT_58814
jgi|Trire2|120912|estExt_fgenesh5_pg.C_50119	120912	estExt_fgenesh5_pg.C_50119	-1.29755	0.406816	1.81119	8.1835e-07	3.43861e-06	down in ∆ypr2		120912	TRIRE2_120912	5	356197	357813	2	1723	-	-	-	-	-	-	-	-	-	-	-	unknown protein	-	-	-	-	-	-	-	-	-	-	-	TRIREDRAFT_120912
jgi|Trire2|105247|fgenesh5_pg.C_scaffold_5000032	105247	fgenesh5_pg.C_scaffold_5000032	-3.93121	0.0655524	-0.551196	3.04866e-09	1.70989e-08	down in ∆ypr2		105247	TRIRE2_105247	5	95803	95922	2	1796	CAZymes	0	Carbohydrate esterase	Carbohydrate esterase family10	0	307538	48872	0	-	-	-	dipeptidyl peptidase 5	NCU10680	-	-	-	-	-	-	-	-	-	-	TRIREDRAFT_105247
jgi|Trire2|105242|fgenesh5_pg.C_scaffold_5000027	105242	fgenesh5_pg.C_scaffold_5000027	-3.54117	0.0859019	1.08889	1.08235e-16	1.07024e-15	down in ∆ypr2		105242	TRIRE2_105242	5	83688	84471	2	1801	-	-	-	-	-	-	-	-	-	-	-	SAM-dependent methyltransferases	-	-	-	ANID_03717	832	526005	526836	-	conserved hypothetical protein	II	PF08242.4,PF08241.5,PF08241.4,PF08242.5,PF01209.11	TRIREDRAFT_105242
jgi|Trire2|105222|fgenesh5_pg.C_scaffold_5000007	105222	fgenesh5_pg.C_scaffold_5000007	-3.30312	0.101312	0.875185	3.51913e-18	3.80877e-17	down in ∆ypr2		105222	TRIRE2_105222	5	13504	13562	2	1818	Effector proteins (competition and defense)	0	Tandem repeat proteins	0	Tandem repeats	0	0	YML027W	-	-	-	orphan protein	-	-	-	-	-	-	-	-	-	-	-	TRIREDRAFT_105222
jgi|Trire2|58601|e_gw1.5.385.1	58601	e_gw1.5.385.1	-2.03863	0.243396	-0.30477	0.000110343	0.000336265	down in ∆ypr2		58601	TRIRE2_58601	5	4222	4589	2	1821	-	-	-	-	-	-	-	-	-	-	-	unknown protein	-	-	-	-	-	-	-	-	-	-	-	TRIREDRAFT_58601
jgi|Trire2|82146|estExt_GeneWisePlus.C_310125	82146	estExt_GeneWisePlus.C_310125	-1.22963	0.426428	5.65781	5.01092e-13	3.94903e-12	down in ∆ypr2		82146	TRIRE2_82146	31	202019	202419	3	8	-	-	-	-	-	-	-	-	-	-	-	unknown protein	-	-	-	-	-	-	-	-	-	-	-	TRIREDRAFT_82146
jgi|Trire2|112031|fgenesh5_pg.C_scaffold_31000069	112031	fgenesh5_pg.C_scaffold_31000069	-1.72942	0.301574	5.49863	1.34072e-18	1.47248e-17	down in ∆ypr2		112031	TRIRE2_112031	31	198986	199060	3	9	-	-	-	-	-	-	-	-	-	-	-	orphan protein, secreted	-	-	-	-	-	-	-	-	-	-	-	TRIREDRAFT_112031
jgi|Trire2|124043|estExt_fgenesh5_pg.C_310058	124043	estExt_fgenesh5_pg.C_310058	-2.65122	0.159185	-1.1795	0.000461967	0.00126067	down in ∆ypr2	46	124043	TRIRE2_124043	31	172323	172458	3	19	CAZymes	chi18-14	Glycoside hydrolase	Glycoside hydrolase family18	chitinase; fungal subgroup B chitinase	210297	85551	YLR286C	chi18-14	Glycoside Hydrolase Family 18, chitinase	candidate chitinase; C-terminal CBM1 module	GH18, chitinase CHI18-14	-	-	-	-	-	-	-	-	-	-	-	TRIREDRAFT_124043
jgi|Trire2|112018|fgenesh5_pg.C_scaffold_31000056	112018	fgenesh5_pg.C_scaffold_31000056	-1.426	0.372161	7.89194	5.3264e-28	9.27085e-27	down in ∆ypr2	46	112018	TRIRE2_112018	31	166272	166955	3	21	Secondary metabolism	tps2	Terpenoid synthase	0	Terpenoid synthase domain containing	296843	214993	0	-	-	-	Terpenoid synthase domain containing TPS2	-	-	-	-	-	-	-	-	-	-	-	TRIREDRAFT_112018
jgi|Trire2|5855|fgenesh1_pm.C_scaffold_31000019	5855	fgenesh1_pm.C_scaffold_31000019	-1.45422	0.364952	-0.426543	0.0031506	0.00730697	down in ∆ypr2	46	5855	TRIRE2_5855	31	164182	164980	3	22	-	-	-	-	-	-	-	-	-	-	-	NmrA family protein	-	-	-	ANID_12390	1174	11740	12913	+	conserved hypothetical protein	VII	PF05368.6	TRIREDRAFT_5855
jgi|Trire2|82141|estExt_GeneWisePlus.C_310101	82141	estExt_GeneWisePlus.C_310101	-1.00453	0.498433	7.1506	1.00214e-15	9.42897e-15	down in ∆ypr2	46	82141	TRIRE2_82141	31	161420	162558	3	23	-	-	-	-	-	-	-	-	-	-	-	serine carboxypeptidase S28, putative	NCU00831	scp	0	ANID_07231	1560	80125	81684	-	extracelular serine carboxypeptidase	IV	PF05577.4,PF05577.5	TRIREDRAFT_82141
jgi|Trire2|69863|e_gw1.31.20.1	69863	e_gw1.31.20.1	-1.10046	0.466369	6.10841	1.2451e-23	1.7788e-22	down in ∆ypr2		69863	TRIRE2_69863	31	18435	18631	3	65	-	-	-	-	-	-	-	-	\N	amidase	pfam01425, Amidase	Amidase	NCU08719	0	0	-	-	-	-	-	-	-	-	TRIREDRAFT_69863
jgi|Trire2|124249|estExt_fgenesh5_pg.C_410015	124249	estExt_fgenesh5_pg.C_410015	-1.00812	0.497193	5.19386	1.84708e-16	1.8084e-15	down in ∆ypr2		124249	TRIRE2_124249	41	46358	46441	3	76	-	-	-	-	-	-	-	-	-	-	-	unknown protein	NCU07123	0	0	ANID_01880	1759	223366	225124	+	conserved hypothetical protein	VII	0	TRIREDRAFT_124249
jgi|Trire2|112478|fgenesh5_pg.C_scaffold_41000007	112478	fgenesh5_pg.C_scaffold_41000007	-2.18173	0.220412	-0.450551	2.21618e-05	7.52405e-05	down in ∆ypr2		112478	TRIRE2_112478	41	16711	18237	3	84	-	-	-	-	-	-	-	-	-	-	-	unknown protein, only in A. oryzae	-	-	-	-	-	-	-	-	-	-	-	TRIREDRAFT_112478
jgi|Trire2|68582|e_gw1.25.153.1	68582	e_gw1.25.153.1	-1.00374	0.498707	8.05684	1.9215e-17	2.002e-16	down in ∆ypr2		68582	TRIRE2_68582	25	184341	186482	3	151	-	-	-	-	-	-	-	-	\N	Conserved hypothetical protein	Shares significant amino acid sequence identity (E = 0.0) with yeast tRNA ligase (TRL1 gene product).	tRNA ligase TRL1	NCU04410	0	0	ANID_01296	2481	323331	325811	+	tRNA ligase	VIII	PF08302.3,PF08303.3,PF09511.3,PF08304.3,PF08303.4,PF08302.4	TRIREDRAFT_68582
jgi|Trire2|123702|estExt_fgenesh5_pg.C_250085	123702	estExt_fgenesh5_pg.C_250085	-1.10202	0.465865	6.32159	3.27979e-28	5.78759e-27	down in ∆ypr2		123702	TRIRE2_123702	25	218229	218357	3	164	-	-	-	-	-	-	-	-	\N	transporter	protein belonging to the major facilitator superfamily, probable general substrate transporter, contains 10 transmembrane domains	MFS permease	-	-	-	ANID_11167	1700	233124	234823	+	sugar transporter	IV	PF07690.9,PF07690.8,PF00083.17	TRIREDRAFT_123702
jgi|Trire2|111250|fgenesh5_pg.C_scaffold_25000092	111250	fgenesh5_pg.C_scaffold_25000092	-1.57357	0.335975	-0.0964873	0.00188502	0.00456876	down in ∆ypr2		111250	TRIRE2_111250	25	239939	240503	3	170	-	-	-	-	-	-	-	-	-	-	-	unknown protein	-	-	-	-	-	-	-	-	-	-	-	TRIREDRAFT_111250
jgi|Trire2|111251|fgenesh5_pg.C_scaffold_25000093	111251	fgenesh5_pg.C_scaffold_25000093	-2.29897	0.203208	7.68961	2.02109e-65	1.15681e-63	down in ∆ypr2		111251	TRIRE2_111251	25	242180	242539	3	171	-	-	-	-	-	-	-	-	-	-	-	unknown protein	-	-	-	-	-	-	-	-	-	-	-	TRIREDRAFT_111251
jgi|Trire2|81517|estExt_GeneWisePlus.C_250157	81517	estExt_GeneWisePlus.C_250157	-1.52181	0.348248	8.58627	1.48911e-34	3.4716e-33	down in ∆ypr2		81517	TRIRE2_81517	25	250575	252326	3	174	-	-	-	-	-	-	-	-	-	-	-	unknown protein	NCU04859	nst-4	0	-	-	-	-	-	-	-	-	TRIREDRAFT_81517
jgi|Trire2|123713|estExt_fgenesh5_pg.C_250112	123713	estExt_fgenesh5_pg.C_250112	-1.03942	0.486523	9.6025	6.74113e-17	6.79363e-16	down in ∆ypr2		123713	TRIRE2_123713	25	309217	309261	3	186	Asexual development	medA	Orthologues of conidiation regulators of Aspergilli	0	F.graminearum - related to transcription factor medusa	139437	34415	0	-	-	-	transcriptional regulatorMedA, involved in fruiting body development	NCU07617	acon-3	0	ANID_06230	2281	47686	49966	+	transcriptional regulator Medusa	I	0	TRIREDRAFT_123713
jgi|Trire2|68615|e_gw1.25.188.1	68615	e_gw1.25.188.1	-1.04651	0.484139	3.5251	9.96356e-12	7.13429e-11	down in ∆ypr2		68615	TRIRE2_68615	25	350979	351237	3	196	-	-	-	-	-	-	-	-	\N	Amidase-like protein	pfam01425, Amidase	Amidase	-	-	-	ANID_11219	1513	266294	267806	-	glutamyl-tRNA(Gln) amidotransferase subunit A	VIII	PF01425.13,PF01425.14	TRIREDRAFT_68615
jgi|Trire2|108018|fgenesh5_pg.C_scaffold_10000408	108018	fgenesh5_pg.C_scaffold_10000408	-3.36309	0.0971873	2.95918	9.28891e-47	3.19003e-45	down in ∆ypr2		108018	TRIRE2_108018	10	1125697	1125876	3	226	-	-	-	-	-	-	-	-	-	-	-	unknown protein	-	-	-	ANID_10907	594	10716	11309	-	PLAC8 family protein	IV	TIGR01571,PF04749.9,PF04749.10	TRIREDRAFT_108018
jgi|Trire2|108010|fgenesh5_pg.C_scaffold_10000400	108010	fgenesh5_pg.C_scaffold_10000400	-1.7064	0.306425	5.11052	9.09163e-37	2.33274e-35	down in ∆ypr2		108010	TRIRE2_108010	10	1101250	1102005	3	235	-	-	-	-	-	-	-	-	-	-	-	ABC transporter	-	-	-	-	-	-	-	-	-	-	-	TRIREDRAFT_108010
jgi|Trire2|22453|estExt_fgenesh1_pm.C_100147	22453	estExt_fgenesh1_pm.C_100147	-1.03473	0.488109	2.09285	6.88839e-06	2.5458e-05	down in ∆ypr2		22453	TRIRE2_22453	10	1064822	1065392	3	248	Sulfur metabolism	0	sulfur related enzymes	EC number 2.5.1.18	glutathione S-transferase, cytosolic, related to S. cerevisiae Gtt2p	223166	89283	0	-	-	-	glutathione-S-transferase	NCU02888	0	0	ANID_02948	855	407206	408060	+	glutathione S-transferase	VI	0	TRIREDRAFT_22453
jgi|Trire2|78465|estExt_GeneWisePlus.C_100536	78465	estExt_GeneWisePlus.C_100536	-1.51898	0.348932	7.32822	5.16592e-39	1.4325e-37	down in ∆ypr2	47	78465	TRIRE2_78465	10	962843	964663	3	285	-	-	-	-	-	-	-	-	-	-	-	siderophore transporter	-	-	-	-	-	-	-	-	-	-	-	TRIREDRAFT_78465
jgi|Trire2|122127|estExt_fgenesh5_pg.C_100337	122127	estExt_fgenesh5_pg.C_100337	-2.14031	0.226831	9.50675	1.2493e-58	5.93352e-57	down in ∆ypr2	47	122127	TRIRE2_122127	10	961293	961555	3	286	-	-	-	-	-	-	-	-	-	-	-	SSCRP	NCU00399	0	0	ANID_08333	751	94675	95425	+	PhiA protein	Unmapped scaffolds	0	TRIREDRAFT_122127
jgi|Trire2|107949|fgenesh5_pg.C_scaffold_10000339	107949	fgenesh5_pg.C_scaffold_10000339	-3.69673	0.0771213	-1.78774	0.000842741	0.00218745	down in ∆ypr2	47	107949	TRIRE2_107949	10	960353	960784	3	287	-	-	-	-	-	-	-	-	-	-	-	unknown protein with ThiJ/PfpI domain	NCU01521	0	0	ANID_08527	855	23049	23903	-	conserved hypothetical protein	Unmapped scaffolds	PF01965.17,PF01965.16	TRIREDRAFT_107949
jgi|Trire2|122124|estExt_fgenesh5_pg.C_100326	122124	estExt_fgenesh5_pg.C_100326	-1.22814	0.426867	9.17218	1.33912e-23	1.90702e-22	down in ∆ypr2		122124	TRIRE2_122124	10	927050	929138	3	297	-	-	-	-	-	-	-	-	-	-	-	AAA ATPase	-	-	-	ANID_03615	3199	226610	229808	+	conserved hypothetical protein	II	PF00004.22,PF00004.21	TRIREDRAFT_122124
jgi|Trire2|62488|e_gw1.10.504.1	62488	e_gw1.10.504.1	-1.78239	0.290702	6.14837	3.32123e-68	2.0738e-66	down in ∆ypr2		62488	TRIRE2_62488	10	880817	881065	3	309	-	-	-	-	-	-	-	-	-	-	-	MFS permease	NCU06077	0	0	ANID_02675	1614	18962	20575	-	conserved hypothetical protein	VI	PF07690.9,PF07690.8,PF00083.17,TIGR00880	TRIREDRAFT_62488
jgi|Trire2|122102|estExt_fgenesh5_pg.C_100294	122102	estExt_fgenesh5_pg.C_100294	-1.47513	0.359701	2.63003	2.57399e-10	1.60721e-09	down in ∆ypr2		122102	TRIRE2_122102	10	831498	832361	3	325	-	-	-	-	-	-	-	-	-	-	-	unknown protein	-	-	-	-	-	-	-	-	-	-	-	TRIREDRAFT_122102
jgi|Trire2|4124|fgenesh1_pm.C_scaffold_10000102	4124	fgenesh1_pm.C_scaffold_10000102	-3.95068	0.0646737	3.85639	5.41394e-96	6.27806e-94	down in ∆ypr2		4124	TRIRE2_4124	10	782895	783443	3	342	Chromatin and histone modification	0	chromatin-binding domain proteins	SANT domain proteins	related to SANT_1	168012	16009	YER088C	-	-	-	myb transcriptional regulator	NCU06140	0	0	-	-	-	-	-	-	-	-	TRIREDRAFT_4124
jgi|Trire2|62172|e_gw1.10.495.1	62172	e_gw1.10.495.1	-1.2682	0.415177	3.42595	3.26348e-15	3.00718e-14	down in ∆ypr2		62172	TRIRE2_62172	10	776080	777723	3	343	-	-	-	-	-	-	-	-	\N	Amino acid transporter-like protein	COG0531, PotE, Amino acid transporters	amino acid permease (PotE?)	-	-	-	ANID_07150	1599	45568	47166	+	amino acid permease	IV	PF00324.14	TRIREDRAFT_62172
jgi|Trire2|122083|estExt_fgenesh5_pg.C_100236	122083	estExt_fgenesh5_pg.C_100236	-1.1244	0.458694	7.18854	4.30505e-24	6.2913e-23	down in ∆ypr2	48	122083	TRIRE2_122083	10	687315	687684	3	375	-	-	-	-	-	-	-	-	-	-	-	peptidase family M28	-	-	-	-	-	-	-	-	-	-	-	TRIREDRAFT_122083
jgi|Trire2|107848|fgenesh5_pg.C_scaffold_10000238	107848	fgenesh5_pg.C_scaffold_10000238	-1.50854	0.351467	4.28991	1.87371e-29	3.50011e-28	down in ∆ypr2	48	107848	TRIRE2_107848	10	685745	686137	3	376	-	-	-	-	-	-	-	-	-	-	-	multicopper oxidase type 1, secreted	-	-	-	ANID_11711	399	57584	57982	+	predicted protein	II	0	TRIREDRAFT_107848
jgi|Trire2|30084|gw1.10.197.1	30084	gw1.10.197.1	-1.11307	0.462309	1.99192	1.22289e-06	5.03421e-06	down in ∆ypr2	48	30084	TRIRE2_30084	10	684241	685152	3	377	-	-	-	-	-	-	-	-	-	-	-	unknown protein	-	-	-	-	-	-	-	-	-	-	-	TRIREDRAFT_30084
jgi|Trire2|107844|fgenesh5_pg.C_scaffold_10000234	107844	fgenesh5_pg.C_scaffold_10000234	-2.41862	0.187035	-0.553246	7.07875e-06	2.61075e-05	down in ∆ypr2	48	107844	TRIRE2_107844	10	676358	676574	3	380	-	-	-	-	-	-	-	-	-	-	-	unknown protein, 3 TM, only in Gibberella and Chaetomium	-	-	-	-	-	-	-	-	-	-	-	TRIREDRAFT_107844
jgi|Trire2|107843|fgenesh5_pg.C_scaffold_10000233	107843	fgenesh5_pg.C_scaffold_10000233	-2.45139	0.182834	-1.31038	0.00172952	0.00424489	down in ∆ypr2	48	107843	TRIRE2_107843	10	674910	675082	3	381	-	-	-	-	-	-	-	-	-	-	-	orphan protein	-	-	-	-	-	-	-	-	-	-	-	TRIREDRAFT_107843
jgi|Trire2|107835|fgenesh5_pg.C_scaffold_10000225	107835	fgenesh5_pg.C_scaffold_10000225	-3.19887	0.108904	2.53183	4.37941e-44	1.42195e-42	down in ∆ypr2		107835	TRIRE2_107835	10	656719	656737	3	387	CAZymes	0	Carbohydrate esterase	Carbohydrate esterase family10	0	-	68116	0	-	-	-	CE10 Arylacetamide deacetylase	-	-	-	-	-	-	-	-	-	-	-	TRIREDRAFT_107835
jgi|Trire2|62171|e_gw1.10.128.1	62171	e_gw1.10.128.1	-1.61616	0.326202	2.698	4.87281e-14	4.14375e-13	down in ∆ypr2		62171	TRIRE2_62171	10	654357	655214	3	388	-	-	-	-	-	-	-	-	-	-	-	MFS permease	-	-	-	-	-	-	-	-	-	-	-	TRIREDRAFT_62171
jgi|Trire2|62323|e_gw1.10.447.1	62323	e_gw1.10.447.1	-1.1337	0.455745	4.74095	2.36958e-20	2.85919e-19	down in ∆ypr2		62323	TRIRE2_62323	10	387484	388525	3	467	-	-	-	-	-	-	-	-	-	-	-	unknown protein	-	-	-	ANID_02604	1505	287922	289426	+	conserved hypothetical protein	VII	0	TRIREDRAFT_62323
jgi|Trire2|71496|kg2.C_scaffold_10000023	71496	kg2.C_scaffold_10000023	-1.10966	0.463402	3.12337	2.91021e-07	1.29216e-06	down in ∆ypr2		71496	TRIRE2_71496	10	256492	256643	3	501	-	-	-	-	-	-	-	-	\N	ADH_zinc_N, Zinc-binding dehydrogenase	pfam00107, ADH_zinc_N, Zinc-binding dehydrogenase	Zinc-binding dehydrogenase	-	-	-	-	-	-	-	-	-	-	-	TRIREDRAFT_71496
jgi|Trire2|22386|estExt_fgenesh1_pm.C_100027	22386	estExt_fgenesh1_pm.C_100027	-3.51089	0.0877238	5.79193	4.41964e-48	1.57852e-46	down in ∆ypr2		22386	TRIRE2_22386	10	192393	192952	3	517	-	-	-	-	-	-	-	-	-	-	-	Epl1/Sm1	NCU02884	0	0	-	-	-	-	-	-	-	-	TRIREDRAFT_22386
jgi|Trire2|4027|fgenesh1_pm.C_scaffold_10000005	4027	fgenesh1_pm.C_scaffold_10000005	-1.07911	0.473321	2.4453	8.15404e-08	3.90388e-07	down in ∆ypr2		4027	TRIRE2_4027	10	25878	26134	3	558	CAZymes	0	Glycosyl transferase	Glycosyl transferase family25	0	-	50803	0	\N	Glycosyltransferase Family 25	distantly related to b-glycosyltransferases	GT25 b-glycosyltransferases	NCU05138	0	0	ANID_10601	1379	13109	14487	+	LPS glycosyltransferase	III	0	TRIREDRAFT_4027
jgi|Trire2|106797|fgenesh5_pg.C_scaffold_8000076	106797	fgenesh5_pg.C_scaffold_8000076	-1.90803	0.266455	5.21963	3.16205e-62	1.66082e-60	down in ∆ypr2		106797	TRIRE2_106797	8	178622	179404	3	633	-	-	-	-	-	-	-	-	-	-	-	unknown protein	NCU05036	0	0	-	-	-	-	-	-	-	-	TRIREDRAFT_106797
jgi|Trire2|106798|fgenesh5_pg.C_scaffold_8000077	106798	fgenesh5_pg.C_scaffold_8000077	-1.33189	0.397248	6.31955	1.65499e-41	5.04348e-40	down in ∆ypr2		106798	TRIRE2_106798	8	181077	181703	3	634	-	-	-	-	-	-	-	-	-	-	-	GCN5-N-acetyltransferase	NCU07126	0	0	-	-	-	-	-	-	-	-	TRIREDRAFT_106798
jgi|Trire2|121556|estExt_fgenesh5_pg.C_80084	121556	estExt_fgenesh5_pg.C_80084	-1.77627	0.291936	3.9997	8.31596e-33	1.7979e-31	down in ∆ypr2		121556	TRIRE2_121556	8	208971	209205	3	640	-	-	-	-	-	-	-	-	-	-	-	unknown protein	-	-	-	ANID_08989	566	32436	33001	+	glyoxalase	VII	0	TRIREDRAFT_121556
jgi|Trire2|106821|fgenesh5_pg.C_scaffold_8000100	106821	fgenesh5_pg.C_scaffold_8000100	-1.526	0.347238	-0.0789313	0.000362836	0.00101164	down in ∆ypr2		106821	TRIRE2_106821	8	249468	250278	3	654	-	-	-	-	-	-	-	-	-	-	-	unknown protein	-	-	-	-	-	-	-	-	-	-	-	TRIREDRAFT_106821
jgi|Trire2|61227|e_gw1.8.590.1	61227	e_gw1.8.590.1	-5.46882	0.0225798	8.5612	4.01792e-110	5.88132e-108	down in ∆ypr2		61227	TRIRE2_61227	8	377547	377654	3	694	-	-	-	-	-	-	-	-	-	-	-	cobalamin synthesis protein	-	-	-	ANID_10344	1914	20288	22201	+	CobW domain-containing protein	VI	PF02492.11,PF02492.12,PF07683.7,PF07683.6	TRIREDRAFT_61227
jgi|Trire2|106869|fgenesh5_pg.C_scaffold_8000148	106869	fgenesh5_pg.C_scaffold_8000148	-2.2991	0.20319	-1.40323	0.00425042	0.00954528	down in ∆ypr2		106869	TRIRE2_106869	8	386575	386761	3	697	Lipid Metabolism	0	Triglyceride utilization	Acyl-CoA synthetase	Long chain fatty acid acyl-CoA ligase	36230	37084	YBR222C	-	-	-	acyl-CoA-synthase	-	-	-	-	-	-	-	-	-	-	-	TRIREDRAFT_106869
[truncated: 324 more rows]

## Sheet: overlapping regulation YPR2
Overlapping gene regulation by YPR2 (DD) with induction specific genes, photoreceptor regulation and CRE1 targets
(data for analysis from: Tisch et al., 2013 PMID 24070552; Monroy et al., 2017 PMID 28809958)
[truncated: 1,403 more rows]
